# Supplementary material for: Predicting clinical trial success for Clostridium difficile infections based on preclinical data
Source: Front Artif Intell. 2024 Oct 9;7:1487335. doi: 10.3389/frai.2024.1487335 (PMC11496251; doi:10.3389/frai.2024.1487335)
Supplement: Supplementary file 1 [file Data_Sheet_1.XLSX]

## Sheet: README
Sheet	Column	Description
Preclinical Raw	Link	Link to the preclinical trial publication.
	Year	Year of the preclinical trial publication.
	acute/sustained	Timepoint at which the effect of drug being studied was measured.
	sample group size	Total number of samples in the experiment arm.
	outcome count	Number of samples in the experiment arm that survived at the measured timepoint.
	gnotobiotic	Microbial status of experimental animal samples. SPF (specific pathogen-Free) or axenic.
	animal strain	Strain of the animal.
	animal sex	Gender of the animal.
	animal age value (days)	Age of the animal in days.
	animal weight value (g)	Weight of the animal in grams.
	species	Species of the animal.
	mechanism_of_action	Mechanism of action of the intervention drug.
	disease model	Disease model used by the preclinical trial. Challenge refers to the induction of C. difficile in the experimental subjects.
	success measure	Measure of success. Either mortality or survival is recorded in this dataset.
	tested dose dependently	Whether if the dosage of the drug was tested dependently.
	prophylactic / therapeutic	Prophylactic drugs are designed to prevent the occurrence of a disease, while therapeutic drugs focus on treating a disease that has already occurred.
	ribotype	Ribotype of C. difficile.
	c diff strain	Strain of C. difficile.
	c diff dose value	Dosage value of C. difficile.
	c diff dose units	Dosage unit of C. difficile.
	c diff dose vegetative/spores	Form of C. difficile.
	daily dosage	Dosage of drug per day.
	total dosage	Total dosage of drug throughout the period of study.
	dosage value	Dosage of drug per each time.
	dosage units	Unit of drug dosage.
	dosage times per day	How many times the drug was given each day.
	dosage duration	How many days the drug was given.
	intervention	Drug tested.
	result	Survival rate of the samples in this arm. (outcome count / sample group size)
Clinical Raw	URL	URL to the clinical trial.
	Title	Title of the clinical trial.
	acute/sustained	Timepoint at which the effect of drug being studied was measured.
	daily dosage	Dosage of drug per day.
	total dosage	Total dosage of drug throughout the period of study.
	dosage value	Dosage of drug per each time.
	dosage units	Unit of drug dosage.
	dosage times per day	How many times the drug was given each day.
	dosage duration	How many days the drug was given.
	intervention class	Category of the intervention drug.
	intervention	Drug tested.
	dose dependence	Whether if the dosage of the drug was tested dependently.
	sample group size	Total number of samples in the experiment arm.
	prophylactic / therapeutic	Prophylactic drugs are designed to prevent the occurrence of a disease, while therapeutic drugs focus on treating a disease that has already occurred.
	Gender	Gender of the samples.
	Age Groups	Age Groups of the samples.
	Phases	Clinical trial phase.
	intervention:Specific	Different nomenclature used for the drug.
	intervention:Variation	Different nomenclature used for the drug.
	outcome count	Number of samples in the experiment arm that recovered at the measured timepoint.
	result	Recovery rate of the samples in this arm. (outcome count / sample group size)

## Sheet: Preclinical Raw
Link	Year	acute/sustained	sample group size	outcome count	gnotobiotic	animal strain	animal sex	animal age value (days)	animal weight value (g)	species	mechanism_of_action	disease model	success measure	tested dose dependently	prophylactic / therapeutic	ribotype	c diff strain	c diff dose value	c diff dose units	c diff dose vegetative/spores	daily dosage	total dosage	dosage value	dosage units	dosage times per day	dosage duration	intervention	result
https://pubmed.ncbi.nlm.nih.gov/77366	1978	acute	4	4	n/a	goldensyrian	n/a	42		hamster		challenge	deathfromenterocolitis	f	p		na	13	cfu								negativecontrol	1
https://pubmed.ncbi.nlm.nih.gov/77366	1978	acute	4	0	n/a	goldensyrian	n/a	42		hamster		challenge	deathfromenterocolitis	f	p		na	13	cfu		3		3	mg/ml		7	vancomycin	0
https://pubmed.ncbi.nlm.nih.gov/26917573	2016	acute	13	6	n/a	c57bl/6	m	504		mouse		vancomycin,colistin,gentamicin,metronidazole+clindamycin+challenge	cumulativemortality	f	t	87	vpi10463	100000									oldcontrol	0.461538
https://pubmed.ncbi.nlm.nih.gov/26917573	2016	acute	8	8	n/a	c57bl/6	m	504		mouse		vancomycin,colistin,gentamicin,metronidazole+clindamycin+challenge	cumulativemortality	f	t	87	vpi10463	100000			50	250	50	mg/kg	qd	5	vancomycin	1
https://pubmed.ncbi.nlm.nih.gov/26917573	2016	sustained	8	2	n/a	c57bl/6	m	504		mouse		vancomycin,colistin,gentamicin,metronidazole+clindamycin+challenge	cumulativemortality	f	t	87	vpi10463	100000			50	250	50	mg/kg	qd	5	vancomycin	0.25
https://pubmed.ncbi.nlm.nih.gov/26917573	2016	acute	13	7	n/a	c57bl/6	m	56		mouse		vancomycin,colistin,gentamicin,metronidazole+clindamycin+challenge	cumulativemortality	f	t	87	vpi10463	100000									youngcontrol	0.538462
https://pubmed.ncbi.nlm.nih.gov/26917573	2016	acute	8	8	n/a	c57bl/6	m	56		mouse		vancomycin,colistin,gentamicin,metronidazole+clindamycin+challenge	cumulativemortality	f	t	87	vpi10463	100000			50	250	50	mg/kg	qd	5	vancomycin	1
https://pubmed.ncbi.nlm.nih.gov/26917573	2016	sustained	8	8	n/a	c57bl/6	m	56		mouse		vancomycin,colistin,gentamicin,metronidazole+clindamycin+challenge	cumulativemortality	f	t	87	vpi10463	100000			50	250	50	mg/kg	qd	5	vancomycin	1
https://pubmed.ncbi.nlm.nih.gov/33305657	2020	acute	12	12	n/a	c57bl/6	n/a	84		mouse		neomycin+metronidazole+vancomycin+clindamycin+challenge	cumulativemortality	f	p	87	vpi10463	1000		spores	1000	1000	10^3	spores	qd	1	ntcd-035	1
https://pubmed.ncbi.nlm.nih.gov/33305657	2020	acute	12	4	n/a	c57bl/6	n/a	84		mouse		neomycin+metronidazole+vancomycin+clindamycin+challenge	cumulativemortality	f	p	87	vpi10463	1000		spores							negativecontrol	0.333333
https://pubmed.ncbi.nlm.nih.gov/24277020	2014	acute	10	4	n/a	goldensyrian	m	58	111	hamster		clindamycin+challenge	cumulativemortality	t	t	87	vpi10463	100000	cfu	spores	0.3	1.5	0.3	mg/kg	qd	5	cadazolid	0.4
https://pubmed.ncbi.nlm.nih.gov/24277020	2014	acute	10	3	n/a	goldensyrian	m	58	111	hamster		clindamycin+challenge	cumulativemortality	t	t	87	vpi10463	100000	cfu	spores	0.3	1.5	0.3	mg/kg	qd	5	vancomycin	0.3
https://pubmed.ncbi.nlm.nih.gov/24277020	2014	acute	10	10	n/a	goldensyrian	m	58	111	hamster		clindamycin+challenge	cumulativemortality	t	t	87	vpi10463	100000	cfu	spores	10	50	10	mg/kg	qd	5	cadazolid	1
https://pubmed.ncbi.nlm.nih.gov/24277020	2014	acute	10	10	n/a	goldensyrian	m	58	111	hamster		clindamycin+challenge	cumulativemortality	t	t	87	vpi10463	100000	cfu	spores	100	500	100	mg/kg	qd	5	cadazolid	1
https://pubmed.ncbi.nlm.nih.gov/24277020	2014	acute	10	10	n/a	goldensyrian	m	58	111	hamster		clindamycin+challenge	cumulativemortality	t	t	87	vpi10463	100000	cfu	spores	12.5	62.5	12.5	mg/kg	qd	5	cadazolid	1
https://pubmed.ncbi.nlm.nih.gov/24277020	2014	acute	10	10	n/a	goldensyrian	m	58	111	hamster		clindamycin+challenge	cumulativemortality	t	t	87	vpi10463	100000	cfu	spores	12.5	62.5	12.5	mg/kg	qd	5	vancomycin	1
https://pubmed.ncbi.nlm.nih.gov/24277020	2014	acute	10	10	n/a	goldensyrian	m	58	111	hamster		clindamycin+challenge	cumulativemortality	t	t	87	vpi10463	100000	cfu	spores	25	125	25	mg/kg	qd	5	cadazolid	1
https://pubmed.ncbi.nlm.nih.gov/24277020	2014	acute	10	10	n/a	goldensyrian	m	58	111	hamster		clindamycin+challenge	cumulativemortality	t	t	87	vpi10463	100000	cfu	spores	25	125	25	mg/kg	qd	5	vancomycin	1
https://pubmed.ncbi.nlm.nih.gov/24277020	2014	acute	10	10	n/a	goldensyrian	m	58	111	hamster		clindamycin+challenge	cumulativemortality	t	t	87	vpi10463	100000	cfu	spores	3	15	3	mg/kg	qd	5	cadazolid	1
https://pubmed.ncbi.nlm.nih.gov/24277020	2014	acute	10	10	n/a	goldensyrian	m	58	111	hamster		clindamycin+challenge	cumulativemortality	t	t	87	vpi10463	100000	cfu	spores	3	15	3	mg/kg	qd	5	vancomycin	1
https://pubmed.ncbi.nlm.nih.gov/24277020	2014	acute	20	20	n/a	goldensyrian	m	58	111	hamster		clindamycin+challenge	cumulativemortality	t	t	87	vpi10463	100000	cfu	spores	30	150	30	mg/kg	qd	5	cadazolid	1
https://pubmed.ncbi.nlm.nih.gov/24277020	2014	acute	10	10	n/a	goldensyrian	m	58	111	hamster		clindamycin+challenge	cumulativemortality	t	t	87	vpi10463	100000	cfu	spores	30	150	30	mg/kg	qd	5	vancomycin	1
https://pubmed.ncbi.nlm.nih.gov/24277020	2014	acute	10	10	n/a	goldensyrian	m	58	111	hamster		clindamycin+challenge	cumulativemortality	t	t	87	vpi10463	100000	cfu	spores	300	1500	300	mg/kg	qd	5	cadazolid	1
https://pubmed.ncbi.nlm.nih.gov/24277020	2014	acute	10	10	n/a	goldensyrian	m	58	111	hamster		clindamycin+challenge	cumulativemortality	t	t	87	vpi10463	100000	cfu	spores	300	1500	300	mg/kg	qd	5	vancomycin	1
https://pubmed.ncbi.nlm.nih.gov/24277020	2014	acute	10	10	n/a	goldensyrian	m	58	111	hamster		clindamycin+challenge	cumulativemortality	t	t	87	vpi10463	100000	cfu	spores	50	250	50	mg/kg	qd	5	cadazolid	1
https://pubmed.ncbi.nlm.nih.gov/24277020	2014	acute	20	20	n/a	goldensyrian	m	58	111	hamster		clindamycin+challenge	cumulativemortality	t	t	87	vpi10463	100000	cfu	spores	50	250	50	mg/kg	qd	5	vancomycin	1
https://pubmed.ncbi.nlm.nih.gov/24277020	2014	acute	30	2	n/a	goldensyrian	m	58	111	hamster		clindamycin+challenge	cumulativemortality	t	t	87	vpi10463	100000	cfu	spores							control	0.0666667
https://pubmed.ncbi.nlm.nih.gov/24277020	2014	sustained	10	2	n/a	goldensyrian	m	58	111	hamster		clindamycin+challenge	cumulativemortality	t	t	87	vpi10463	100000	cfu	spores	0.3	1.5	0.3	mg/kg	qd	5	cadazolid	0.2
https://pubmed.ncbi.nlm.nih.gov/24277020	2014	sustained	10	0	n/a	goldensyrian	m	58	111	hamster		clindamycin+challenge	cumulativemortality	t	t	87	vpi10463	100000	cfu	spores	0.3	1.5	0.3	mg/kg	qd	5	vancomycin	0
https://pubmed.ncbi.nlm.nih.gov/24277020	2014	sustained	10	4	n/a	goldensyrian	m	58	111	hamster		clindamycin+challenge	cumulativemortality	t	t	87	vpi10463	100000	cfu	spores	10	50	10	mg/kg	qd	5	cadazolid	0.4
https://pubmed.ncbi.nlm.nih.gov/24277020	2014	sustained	10	8	n/a	goldensyrian	m	58	111	hamster		clindamycin+challenge	cumulativemortality	t	t	87	vpi10463	100000	cfu	spores	100	500	100	mg/kg	qd	5	cadazolid	0.8
https://pubmed.ncbi.nlm.nih.gov/24277020	2014	sustained	10	4	n/a	goldensyrian	m	58	111	hamster		clindamycin+challenge	cumulativemortality	t	t	87	vpi10463	100000	cfu	spores	12.5	62.5	12.5	mg/kg	qd	5	cadazolid	0.4
https://pubmed.ncbi.nlm.nih.gov/24277020	2014	sustained	10	3	n/a	goldensyrian	m	58	111	hamster		clindamycin+challenge	cumulativemortality	t	t	87	vpi10463	100000	cfu	spores	12.5	62.5	12.5	mg/kg	qd	5	vancomycin	0.3
https://pubmed.ncbi.nlm.nih.gov/24277020	2014	sustained	10	6	n/a	goldensyrian	m	58	111	hamster		clindamycin+challenge	cumulativemortality	t	t	87	vpi10463	100000	cfu	spores	25	125	25	mg/kg	qd	5	cadazolid	0.6
https://pubmed.ncbi.nlm.nih.gov/24277020	2014	sustained	10	4	n/a	goldensyrian	m	58	111	hamster		clindamycin+challenge	cumulativemortality	t	t	87	vpi10463	100000	cfu	spores	25	125	25	mg/kg	qd	5	vancomycin	0.4
https://pubmed.ncbi.nlm.nih.gov/24277020	2014	sustained	10	2	n/a	goldensyrian	m	58	111	hamster		clindamycin+challenge	cumulativemortality	t	t	87	vpi10463	100000	cfu	spores	3	15	3	mg/kg	qd	5	cadazolid	0.2
https://pubmed.ncbi.nlm.nih.gov/24277020	2014	sustained	10	6	n/a	goldensyrian	m	58	111	hamster		clindamycin+challenge	cumulativemortality	t	t	87	vpi10463	100000	cfu	spores	3	15	3	mg/kg	qd	5	vancomycin	0.6
https://pubmed.ncbi.nlm.nih.gov/24277020	2014	sustained	20	10	n/a	goldensyrian	m	58	111	hamster		clindamycin+challenge	cumulativemortality	t	t	87	vpi10463	100000	cfu	spores	30	150	30	mg/kg	qd	5	cadazolid	0.5
https://pubmed.ncbi.nlm.nih.gov/24277020	2014	sustained	10	8	n/a	goldensyrian	m	58	111	hamster		clindamycin+challenge	cumulativemortality	t	t	87	vpi10463	100000	cfu	spores	30	150	30	mg/kg	qd	5	vancomycin	0.8
https://pubmed.ncbi.nlm.nih.gov/24277020	2014	sustained	10	6	n/a	goldensyrian	m	58	111	hamster		clindamycin+challenge	cumulativemortality	t	t	87	vpi10463	100000	cfu	spores	300	1500	300	mg/kg	qd	5	cadazolid	0.6
https://pubmed.ncbi.nlm.nih.gov/24277020	2014	sustained	10	8	n/a	goldensyrian	m	58	111	hamster		clindamycin+challenge	cumulativemortality	t	t	87	vpi10463	100000	cfu	spores	300	1500	300	mg/kg	qd	5	vancomycin	0.8
https://pubmed.ncbi.nlm.nih.gov/24277020	2014	sustained	10	4	n/a	goldensyrian	m	58	111	hamster		clindamycin+challenge	cumulativemortality	t	t	87	vpi10463	100000	cfu	spores	50	250	50	mg/kg	qd	5	cadazolid	0.4
https://pubmed.ncbi.nlm.nih.gov/24277020	2014	sustained	20	20	n/a	goldensyrian	m	58	111	hamster		clindamycin+challenge	cumulativemortality	t	t	87	vpi10463	100000	cfu	spores	50	250	50	mg/kg	qd	5	vancomycin	1
https://pubmed.ncbi.nlm.nih.gov/24277020	2014	sustained	30	2	n/a	goldensyrian	m	58	111	hamster		clindamycin+challenge	cumulativemortality	t	t	87	vpi10463	100000	cfu	spores							control	0.0666667
https://pubmed.ncbi.nlm.nih.gov/23689716	2013	acute	8	2	axenic	n/a	n/a	5		pig		challenge	cumulativemortality	t	t	27	uk6	1000000		spores							control	0.25
https://pubmed.ncbi.nlm.nih.gov/23689716	2013	acute	9	8	axenic	n/a	n/a	5		pig		challenge	cumulativemortality	t	t	27	uk6	1000000		spores	200	1400	100	mg/kg	bid	7	mbx-500	0.888889
https://pubmed.ncbi.nlm.nih.gov/23689716	2013	acute	4	3	axenic	n/a	n/a	5		pig		challenge	cumulativemortality	t	t	27	uk6	1000000		spores	400	2800	200	mg/kg	bid	7	mbx-500	0.75
https://pubmed.ncbi.nlm.nih.gov/23689716	2013	acute	6	6	axenic	n/a	n/a	5		pig		challenge	cumulativemortality	t	t	27	uk6	1000000		spores	800	5600	400	mg/kg	bid	7	mbx-500	1
https://pubmed.ncbi.nlm.nih.gov/23689716	2013	acute	4	4	axenic	n/a	n/a	5		pig		challenge	cumulativemortality	t	t	27	uk6	1000000		spores	40	280	20	mg/kg	bid	7	vancomycin	1
https://pubmed.ncbi.nlm.nih.gov/33495229	2021	acute	10	0	spf	goldensyrian	m	39		hamster		challenge+clindamycin	survival	t	t	87	vpi10463	1000000	cfu		0.04	0.2	0.04	mg/kg	qd	5	fidaxomicin	0
https://pubmed.ncbi.nlm.nih.gov/33495229	2021	acute	10	0	spf	goldensyrian	m	39		hamster		challenge+clindamycin	survival	t	t	87	vpi10463	1000000	cfu		0.04	0.2	0.04	mg/kg	qd	5	vancomycin	0
https://pubmed.ncbi.nlm.nih.gov/33495229	2021	acute	10	3	spf	goldensyrian	m	39		hamster		challenge+clindamycin	survival	t	t	87	vpi10463	1000000	cfu		0.2	1	0.2	mg/kg	qd	5	fidaxomicin	0.3
https://pubmed.ncbi.nlm.nih.gov/33495229	2021	acute	10	0	spf	goldensyrian	m	39		hamster		challenge+clindamycin	survival	t	t	87	vpi10463	1000000	cfu		0.2	1	0.2	mg/kg	qd	5	vancomycin	0
https://pubmed.ncbi.nlm.nih.gov/33495229	2021	acute	10	10	spf	goldensyrian	m	39		hamster		challenge+clindamycin	survival	t	t	87	vpi10463	1000000	cfu		1	5	1	mg/kg	qd	5	fidaxomicin	1
https://pubmed.ncbi.nlm.nih.gov/33495229	2021	acute	10	5	spf	goldensyrian	m	39		hamster		challenge+clindamycin	survival	t	t	87	vpi10463	1000000	cfu		1	5	1	mg/kg	qd	5	vancomycin	0.5
https://pubmed.ncbi.nlm.nih.gov/33495229	2021	acute	10	10	spf	goldensyrian	m	39		hamster		challenge+clindamycin	survival	t	t	87	vpi10463	1000000	cfu		5	25	5	mg/kg	qd	5	fidaxomicin	1
https://pubmed.ncbi.nlm.nih.gov/33495229	2021	acute	10	10	spf	goldensyrian	m	39		hamster		challenge+clindamycin	survival	t	t	87	vpi10463	1000000	cfu		5	25	5	mg/kg	qd	5	vancomycin	1
https://pubmed.ncbi.nlm.nih.gov/33495229	2021	acute	10	0	spf	goldensyrian	m	39		hamster		challenge+clindamycin	survival	t	t	87	vpi10463	1000000	cfu								vehiclecontrol	0
https://pubmed.ncbi.nlm.nih.gov/33495229	2021	sustained	10	0	spf	goldensyrian	m	39		hamster		challenge+clindamycin	survival	t	t	87	vpi10463	1000000	cfu		0.04	0.2	0.04	mg/kg	qd	5	fidaxomicin	0
https://pubmed.ncbi.nlm.nih.gov/33495229	2021	sustained	10	0	spf	goldensyrian	m	39		hamster		challenge+clindamycin	survival	t	t	87	vpi10463	1000000	cfu		0.04	0.2	0.04	mg/kg	qd	5	vancomycin	0
https://pubmed.ncbi.nlm.nih.gov/33495229	2021	sustained	10	0	spf	goldensyrian	m	39		hamster		challenge+clindamycin	survival	t	t	87	vpi10463	1000000	cfu		0.2	1	0.2	mg/kg	qd	5	fidaxomicin	0
https://pubmed.ncbi.nlm.nih.gov/33495229	2021	sustained	10	0	spf	goldensyrian	m	39		hamster		challenge+clindamycin	survival	t	t	87	vpi10463	1000000	cfu		0.2	1	0.2	mg/kg	qd	5	vancomycin	0
https://pubmed.ncbi.nlm.nih.gov/33495229	2021	sustained	10	3	spf	goldensyrian	m	39		hamster		challenge+clindamycin	survival	t	t	87	vpi10463	1000000	cfu		1	5	1	mg/kg	qd	5	fidaxomicin	0.3
https://pubmed.ncbi.nlm.nih.gov/33495229	2021	sustained	10	5	spf	goldensyrian	m	39		hamster		challenge+clindamycin	survival	t	t	87	vpi10463	1000000	cfu		1	5	1	mg/kg	qd	5	vancomycin	0.5
https://pubmed.ncbi.nlm.nih.gov/33495229	2021	sustained	10	9	spf	goldensyrian	m	39		hamster		challenge+clindamycin	survival	t	t	87	vpi10463	1000000	cfu		5	25	5	mg/kg	qd	5	fidaxomicin	0.9
https://pubmed.ncbi.nlm.nih.gov/33495229	2021	sustained	10	9	spf	goldensyrian	m	39		hamster		challenge+clindamycin	survival	t	t	87	vpi10463	1000000	cfu		5	25	5	mg/kg	qd	5	vancomycin	0.9
https://pubmed.ncbi.nlm.nih.gov/33495229	2021	sustained	10	0	spf	goldensyrian	m	39		hamster		challenge+clindamycin	survival	t	t	87	vpi10463	1000000	cfu								vehiclecontrol	0
https://pubmed.ncbi.nlm.nih.gov/25824219	2015	acute	10	9	spf	c57bl/6	m	39		mouse		kanamycin,gentamicin,colistin,metronidazole,vancomycin+clindamycin+challenge	cumulativemortality	f	t	87	vpi10463	10000	cfu		50	250	50	mg/kg	qd	5	vancomycin	0.9
https://pubmed.ncbi.nlm.nih.gov/25824219	2015	acute	10	2	spf	c57bl/6	m	39		mouse		kanamycin,gentamicin,colistin,metronidazole,vancomycin+clindamycin+challenge	cumulativemortality	f	t	87	vpi10463	10000	cfu								untreatedcontrol	0.2
https://pubmed.ncbi.nlm.nih.gov/25824219	2015	sustained	10	3	spf	c57bl/6	m	39		mouse		kanamycin,gentamicin,colistin,metronidazole,vancomycin+clindamycin+challenge	cumulativemortality	f	t	87	vpi10463	10000	cfu		50	250	50	mg/kg	qd	5	vancomycin	0.3
https://pubmed.ncbi.nlm.nih.gov/25824219	2015	sustained	10	2	spf	c57bl/6	m	39		mouse		kanamycin,gentamicin,colistin,metronidazole,vancomycin+clindamycin+challenge	cumulativemortality	f	t	87	vpi10463	10000	cfu								untreatedcontrol	0.2
https://pubmed.ncbi.nlm.nih.gov/26461425	2015	acute	10	8	n/a	c57bl/6	f	39		mouse		ampicillin,kanamycin,gentamycin,colistin,metronidazole,vancomycin+clindamycin+challenge	cumulativemortality	f	p	27	uk6	10000000		spores	2000000	4000000	10^6	vegetativecells	bid	2	clostridiumdifficilecd37	0.8
https://pubmed.ncbi.nlm.nih.gov/26461425	2015	acute	10	2	n/a	c57bl/6	f	39		mouse		ampicillin,kanamycin,gentamycin,colistin,metronidazole,vancomycin+clindamycin+challenge	cumulativemortality	f	p	27	uk6	10000000		spores							control	0.2
https://pubmed.ncbi.nlm.nih.gov/23324518	2013	acute	11	8	n/a	goldensyrian	m	54	93	hamster	antibody	clindamycin+challenge	cumulativemortality	t	t	12	atcc43596	3400000	cfu	vegetative	100	500	50	mg/kg	bid	5	mdx	0.727273
https://pubmed.ncbi.nlm.nih.gov/23324518	2013	acute	11	11	n/a	goldensyrian	m	54	93	hamster	antibody	clindamycin+challenge	cumulativemortality	t	t	12	atcc43596	3400000	cfu	vegetative	100	500	50	mg/kg	bid	5	ucb	1
https://pubmed.ncbi.nlm.nih.gov/23324518	2013	acute	11	8	n/a	goldensyrian	m	54	93	hamster	antibody	clindamycin+challenge	cumulativemortality	t	t	12	atcc43596	3400000	cfu	vegetative	10	50	5	mg/kg	bid	5	mdx	0.727273
https://pubmed.ncbi.nlm.nih.gov/23324518	2013	acute	11	11	n/a	goldensyrian	m	54	93	hamster	antibody	clindamycin+challenge	cumulativemortality	t	t	12	atcc43596	3400000	cfu	vegetative	10	50	5	mg/kg	bid	5	ucb	1
https://pubmed.ncbi.nlm.nih.gov/23324518	2013	acute	5	5	n/a	goldensyrian	m	54	93	hamster	antibody	clindamycin+challenge	cumulativemortality	t	t	12	atcc43596	3400000	cfu	vegetative	10	50	5	mg/kg	bid	5	vancomycin	1
https://pubmed.ncbi.nlm.nih.gov/23324518	2013	sustained	11	2	n/a	goldensyrian	m	54	93	hamster	antibody	clindamycin+challenge	cumulativemortality	t	t	12	atcc43596	3400000	cfu	vegetative	100	500	50	mg/kg	bid	5	mdx	0.181818
https://pubmed.ncbi.nlm.nih.gov/23324518	2013	sustained	11	8	n/a	goldensyrian	m	54	93	hamster	antibody	clindamycin+challenge	cumulativemortality	t	t	12	atcc43596	3400000	cfu	vegetative	100	500	50	mg/kg	bid	5	ucb	0.727273
https://pubmed.ncbi.nlm.nih.gov/23324518	2013	sustained	11	1	n/a	goldensyrian	m	54	93	hamster	antibody	clindamycin+challenge	cumulativemortality	t	t	12	atcc43596	3400000	cfu	vegetative	10	50	5	mg/kg	bid	5	mdx	0.0909091
https://pubmed.ncbi.nlm.nih.gov/23324518	2013	sustained	11	0	n/a	goldensyrian	m	54	93	hamster	antibody	clindamycin+challenge	cumulativemortality	t	t	12	atcc43596	3400000	cfu	vegetative	10	50	5	mg/kg	bid	5	ucb	0
https://pubmed.ncbi.nlm.nih.gov/23324518	2013	sustained	5	0	n/a	goldensyrian	m	54	93	hamster	antibody	clindamycin+challenge	cumulativemortality	t	t	12	atcc43596	3400000	cfu	vegetative	10	50	5	mg/kg	bid	5	vancomycin	0
https://pubmed.ncbi.nlm.nih.gov/29483125	2018	acute	10	10	n/a	goldensyrian	f	42	100	hamster		clindamycin+challenge	survival	f	t	12	630	100		spores	10	50	5	mg/kg	bid	5	vancomycin	1
https://pubmed.ncbi.nlm.nih.gov/29483125	2018	acute	10	1	n/a	goldensyrian	f	42	100	hamster		clindamycin+challenge	survival	f	t	12	630	100		spores							negativecontrol	0.1
https://pubmed.ncbi.nlm.nih.gov/29483125	2018	sustained	10	4	n/a	goldensyrian	f	42	100	hamster		clindamycin+challenge	survival	f	t	12	630	100		spores	10	50	5	mg/kg	bid	5	vancomycin	0.4
https://pubmed.ncbi.nlm.nih.gov/29483125	2018	sustained	10	1	n/a	goldensyrian	f	42	100	hamster		clindamycin+challenge	survival	f	t	12	630	100		spores							negativecontrol	0.1
https://pubmed.ncbi.nlm.nih.gov/19251726	2009	acute	8	6	n/a	goldensyrian	m	42	99	hamster	methionyl-trnasynthetaseinhibitor	clindamycin+challenge	cumulativemortality	f	t	12	atcc43596	16000000	cfu	vegetative	1	5	0.5	mg/kg	bid	5	rep3123	0.75
https://pubmed.ncbi.nlm.nih.gov/19251726	2009	acute	8	5	n/a	goldensyrian	m	42	99	hamster	methionyl-trnasynthetaseinhibitor	clindamycin+challenge	cumulativemortality	f	t	12	atcc43596	16000000	cfu	vegetative	1	5	0.5	mg/kg	bid	5	vancomycin	0.625
https://pubmed.ncbi.nlm.nih.gov/19251726	2009	acute	8	7	n/a	goldensyrian	m	42	99	hamster	methionyl-trnasynthetaseinhibitor	clindamycin+challenge	cumulativemortality	f	t	12	atcc43596	16000000	cfu	vegetative	10	50	5	mg/kg	bid	5	rep3123	0.875
https://pubmed.ncbi.nlm.nih.gov/19251726	2009	acute	8	8	n/a	goldensyrian	m	42	99	hamster	methionyl-trnasynthetaseinhibitor	clindamycin+challenge	cumulativemortality	f	t	12	atcc43596	16000000	cfu	vegetative	10	50	5	mg/kg	bid	5	vancomycin	1
https://pubmed.ncbi.nlm.nih.gov/19251726	2009	acute	8	0	n/a	goldensyrian	m	42	99	hamster	methionyl-trnasynthetaseinhibitor	clindamycin+challenge	cumulativemortality	f	t	12	atcc43596	16000000	cfu	vegetative							control	0
https://pubmed.ncbi.nlm.nih.gov/19251726	2009	sustained	8	5	n/a	goldensyrian	m	42	99	hamster	methionyl-trnasynthetaseinhibitor	clindamycin+challenge	cumulativemortality	f	t	12	atcc43596	16000000	cfu	vegetative	1	5	0.5	mg/kg	bid	5	rep3123	0.625
https://pubmed.ncbi.nlm.nih.gov/19251726	2009	sustained	8	5	n/a	goldensyrian	m	42	99	hamster	methionyl-trnasynthetaseinhibitor	clindamycin+challenge	cumulativemortality	f	t	12	atcc43596	16000000	cfu	vegetative	1	5	0.5	mg/kg	bid	5	vancomycin	0.625
https://pubmed.ncbi.nlm.nih.gov/19251726	2009	sustained	8	6	n/a	goldensyrian	m	42	99	hamster	methionyl-trnasynthetaseinhibitor	clindamycin+challenge	cumulativemortality	f	t	12	atcc43596	16000000	cfu	vegetative	10	50	5	mg/kg	bid	5	rep3123	0.75
https://pubmed.ncbi.nlm.nih.gov/19251726	2009	sustained	8	0	n/a	goldensyrian	m	42	99	hamster	methionyl-trnasynthetaseinhibitor	clindamycin+challenge	cumulativemortality	f	t	12	atcc43596	16000000	cfu	vegetative	10	50	5	mg/kg	bid	5	vancomycin	0
https://pubmed.ncbi.nlm.nih.gov/19251726	2009	sustained	8	0	n/a	goldensyrian	m	42	99	hamster	methionyl-trnasynthetaseinhibitor	clindamycin+challenge	cumulativemortality	f	t	12	atcc43596	16000000	cfu	vegetative							control	0
https://pubmed.ncbi.nlm.nih.gov/33045352	2020	acute	10	0	n/a	c57bl/6	f	42		mouse		kanamycin,gentamicin,colistin,metronidazole,vancomycin+clindamycin+challenge	cumulativemortality	t	t	87	vpi10463	800000	cfu	spores	1	6	1	mg/kg	qd	6	metronidazole	0
https://pubmed.ncbi.nlm.nih.gov/33045352	2020	acute	10	6	n/a	c57bl/6	f	42		mouse		kanamycin,gentamicin,colistin,metronidazole,vancomycin+clindamycin+challenge	cumulativemortality	t	t	87	vpi10463	800000	cfu	spores	10	60	10	mg/kg	qd	6	metronidazole	0.6
https://pubmed.ncbi.nlm.nih.gov/33045352	2020	acute	10	10	n/a	c57bl/6	f	42		mouse		kanamycin,gentamicin,colistin,metronidazole,vancomycin+clindamycin+challenge	cumulativemortality	t	t	87	vpi10463	800000	cfu	spores	10	60	10	mg/kg	qd	6	vancomycin	1
https://pubmed.ncbi.nlm.nih.gov/33045352	2020	acute	10	2	n/a	c57bl/6	f	42		mouse		kanamycin,gentamicin,colistin,metronidazole,vancomycin+clindamycin+challenge	cumulativemortality	t	t	87	vpi10463	800000	cfu	spores							control	0.2
https://pubmed.ncbi.nlm.nih.gov/32501140	2020	acute	20	14	n/a	c57bl/6	f	46		mouse		kanamycin,gentamicin,colistin,metronidazole,vancomycin+clindamycin+challenge	cumulativemortality	f	t	27	r20291	8000	cfu	vegetative							fmt-fd	0.7
https://pubmed.ncbi.nlm.nih.gov/32501140	2020	acute	20	11	n/a	c57bl/6	f	46		mouse		kanamycin,gentamicin,colistin,metronidazole,vancomycin+clindamycin+challenge	cumulativemortality	f	t	27	r20291	8000	cfu	vegetative							fmt-g10	0.55
https://pubmed.ncbi.nlm.nih.gov/32501140	2020	acute	20	12	n/a	c57bl/6	f	46		mouse		kanamycin,gentamicin,colistin,metronidazole,vancomycin+clindamycin+challenge	cumulativemortality	f	t	27	r20291	8000	cfu	vegetative							fmt-g80	0.6
https://pubmed.ncbi.nlm.nih.gov/32501140	2020	acute	10	2	n/a	c57bl/6	f	46		mouse		kanamycin,gentamicin,colistin,metronidazole,vancomycin+clindamycin+challenge	cumulativemortality	f	t	27	r20291	8000	cfu	vegetative							negativecontrol	0.2
https://pubmed.ncbi.nlm.nih.gov/23939887/	2013	acute	10	10	n/a	goldensyrian	m	49		hamster		clindamycin+challenge	mortality	f	p	27	bi1	100	cfu	spores	1000000		10^6	cfuofspores	qd	1	m3,antcdstrain	1
https://pubmed.ncbi.nlm.nih.gov/23939887/	2013	acute	10	10	n/a	goldensyrian	m	49		hamster		clindamycin+challenge	mortality	f	p	27	bi1	100	cfu	spores	1000000		10^6	cfuofspores	qd	1	t7,antcdstrain	1
https://pubmed.ncbi.nlm.nih.gov/23939887/	2013	acute	2	0	n/a	goldensyrian	m	49		hamster		clindamycin+challenge	mortality	f	p	27	bi1	100	cfu	spores							control	0
https://pubmed.ncbi.nlm.nih.gov/23939887/	2013	sustained	10	9	n/a	goldensyrian	m	49		hamster		clindamycin+challenge	mortality	f	p	27	bi1	100	cfu	spores	1000000	1000000	10^6	cfuofspores	qd	1	m3,antcdstrain	0.9
https://pubmed.ncbi.nlm.nih.gov/23939887/	2013	sustained	10	8	n/a	goldensyrian	m	49		hamster		clindamycin+challenge	mortality	f	p	27	bi1	100	cfu	spores	1000000	1000000	10^6	cfuofspores	qd	1	t7,antcdstrain	0.8
https://pubmed.ncbi.nlm.nih.gov/23939887/	2013	sustained	2	0	n/a	goldensyrian	m	49		hamster		clindamycin+challenge	mortality	f	p	27	bi1	100	cfu	spores							control	0
https://pubmed.ncbi.nlm.nih.gov/25486992	2015	acute	4	4	n/a	c57bl/6	n/a	49		mouse		kanamycin,gentamicin,colistin,metronidazole,vancomycin+clindamycin+challenge+20dayrecovery+challenge	survival	f	p	27	uk1	100000		spores	10	50	10	mg/kg	qd	5	actoxumab-bezlotoxumab	1
https://pubmed.ncbi.nlm.nih.gov/25486992	2015	acute	4	4	n/a	c57bl/6	n/a	49		mouse		kanamycin,gentamicin,colistin,metronidazole,vancomycin+clindamycin+challenge+20dayrecovery+challenge	survival	f	p	27	uk1	100000		spores	2	10	2	mg/kg	qd	5	actoxumab-bezlotoxumab	1
https://pubmed.ncbi.nlm.nih.gov/25486992	2015	acute	5	4	n/a	c57bl/6	n/a	49		mouse		kanamycin,gentamicin,colistin,metronidazole,vancomycin+clindamycin+challenge	survival	f	t	27	uk1	100000		spores	5	25	5	mg/kg	qd	5	actoxumab-bezlotoxumab	0.8
https://pubmed.ncbi.nlm.nih.gov/25486992	2015	acute	4	4	n/a	c57bl/6	n/a	49		mouse		kanamycin,gentamicin,colistin,metronidazole,vancomycin+clindamycin+challenge+20dayrecovery+challenge	survival	f	p	27	uk1	100000		spores	50	250	50	mg/kg	qd	5	actoxumab-bezlotoxumab	1
https://pubmed.ncbi.nlm.nih.gov/25486992	2015	acute	6	6	n/a	c57bl/6	n/a	49		mouse		kanamycin,gentamicin,colistin,metronidazole,vancomycin+clindamycin+challenge	survival	f	p	27	uk1	100000		spores	50	50	50	mg/kg	qd	1	actoxumab-bezlotoxumab	1
https://pubmed.ncbi.nlm.nih.gov/25486992	2015	acute	5	5	n/a	c57bl/6	n/a	49		mouse		kanamycin,gentamicin,colistin,metronidazole,vancomycin+clindamycin+challenge	survival	f	t	27	uk1	100000		spores	50	50	50	mg/kg	qd	1	actoxumab-bezlotoxumab	1
https://pubmed.ncbi.nlm.nih.gov/25486992	2015	acute	6	6	n/a	c57bl/6	n/a	49		mouse		kanamycin,gentamicin,colistin,metronidazole,vancomycin+clindamycin+challenge	survival	f	p	27	uk1	100000		spores	50	50	50	mg/kg	qd	1	n297qmutantactoxumab-bezlotoxumab	1
https://pubmed.ncbi.nlm.nih.gov/25486992	2015	acute	10	2	n/a	c57bl/6	n/a	49		mouse		kanamycin,gentamicin,colistin,metronidazole,vancomycin+clindamycin+challenge+20dayrecovery+challenge	survival	f	p	27	uk1	100000		spores							control	0.2
https://pubmed.ncbi.nlm.nih.gov/25486992	2015	acute	15	8	n/a	c57bl/6	n/a	49		mouse		kanamycin,gentamicin,colistin,metronidazole,vancomycin+clindamycin+challenge	survival	f	p	27	uk1	100000		spores							control	0.533333
https://pubmed.ncbi.nlm.nih.gov/25486992	2015	acute	10	1	n/a	c57bl/6	n/a	49		mouse		kanamycin,gentamicin,colistin,metronidazole,vancomycin+clindamycin+challenge	survival	f	t	27	uk1	100000		spores							control	0.1
https://pubmed.ncbi.nlm.nih.gov/25486992	2015	sustained	4	4	n/a	c57bl/6	n/a	49		mouse		kanamycin,gentamicin,colistin,metronidazole,vancomycin+clindamycin+challenge+20dayrecovery+challenge	survival	f	p	27	uk1	100000		spores	10	50	10	mg/kg	qd	5	actoxumab-bezlotoxumab	1
https://pubmed.ncbi.nlm.nih.gov/25486992	2015	sustained	4	4	n/a	c57bl/6	n/a	49		mouse		kanamycin,gentamicin,colistin,metronidazole,vancomycin+clindamycin+challenge+20dayrecovery+challenge	survival	f	p	27	uk1	100000		spores	2	10	2	mg/kg	qd	5	actoxumab-bezlotoxumab	1
https://pubmed.ncbi.nlm.nih.gov/25486992	2015	sustained	5	4	n/a	c57bl/6	n/a	49		mouse		kanamycin,gentamicin,colistin,metronidazole,vancomycin+clindamycin+challenge	survival	f	t	27	uk1	100000		spores	5	25	5	mg/kg	qd	5	actoxumab-bezlotoxumab	0.8
https://pubmed.ncbi.nlm.nih.gov/25486992	2015	sustained	6	6	n/a	c57bl/6	n/a	49		mouse		kanamycin,gentamicin,colistin,metronidazole,vancomycin+clindamycin+challenge	survival	f	p	27	uk1	100000		spores	50	50	50	mg/kg	qd	1	actoxumab-bezlotoxumab	1
https://pubmed.ncbi.nlm.nih.gov/25486992	2015	sustained	5	5	n/a	c57bl/6	n/a	49		mouse		kanamycin,gentamicin,colistin,metronidazole,vancomycin+clindamycin+challenge	survival	f	t	27	uk1	100000		spores	50	50	50	mg/kg	qd	1	actoxumab-bezlotoxumab	1
https://pubmed.ncbi.nlm.nih.gov/25486992	2015	sustained	6	6	n/a	c57bl/6	n/a	49		mouse		kanamycin,gentamicin,colistin,metronidazole,vancomycin+clindamycin+challenge	survival	f	p	27	uk1	100000		spores	50	50	50	mg/kg	qd	1	n297qmutantactoxumab-bezlotoxumab	1
https://pubmed.ncbi.nlm.nih.gov/25486992	2015	sustained	4	4	n/a	c57bl/6	n/a	49		mouse		kanamycin,gentamicin,colistin,metronidazole,vancomycin+clindamycin+challenge+20dayrecovery+challenge	survival	f	p	27	uk1	100000		spores	50	250	50	mg/kg	qd	5	actoxumab-bezlotoxumab	1
https://pubmed.ncbi.nlm.nih.gov/25486992	2015	sustained	10	2	n/a	c57bl/6	n/a	49		mouse		kanamycin,gentamicin,colistin,metronidazole,vancomycin+clindamycin+challenge+20dayrecovery+challenge	survival	f	p	27	uk1	100000		spores							control	0.2
https://pubmed.ncbi.nlm.nih.gov/25486992	2015	sustained	15	8	n/a	c57bl/6	n/a	49		mouse		kanamycin,gentamicin,colistin,metronidazole,vancomycin+clindamycin+challenge	survival	f	p	27	uk1	100000		spores							control	0.533333
https://pubmed.ncbi.nlm.nih.gov/25486992	2015	sustained	10	1	n/a	c57bl/6	n/a	49		mouse		kanamycin,gentamicin,colistin,metronidazole,vancomycin+clindamycin+challenge	survival	f	t	27	uk1	100000		spores							control	0.1
https://pubmed.ncbi.nlm.nih.gov/25486992	2015	acute	6	0	n/a	cd1	n/a	49		mouse		25ngeachtcdaandtcdb+ip	survival	f	p	87	vpi10463	5	ug		0.1	0.1	0.1	mg/kg	qd	1	actoxumab-bezlotoxumab	0
https://pubmed.ncbi.nlm.nih.gov/25486992	2015	acute	6	0	n/a	cd1	n/a	49		mouse		25ngeachtcdaandtcdb+ip	survival	f	p	87	vpi10463	5	ug		1	1	1	mg/kg	qd	1	actoxumab-bezlotoxumab	0
https://pubmed.ncbi.nlm.nih.gov/25486992	2015	acute	6	2	n/a	cd1	n/a	49		mouse		25ngeachtcdaandtcdb+ip	survival	f	p	87	vpi10463	5	ug		10	10	10	mg/kg	qd	1	actoxumab-bezlotoxumab	0.333333
https://pubmed.ncbi.nlm.nih.gov/25486992	2015	acute	6	0	n/a	cd1	n/a	49		mouse		25ngeachtcdaandtcdb+ip	survival	f	p	87	vpi10463	5	ug								control	0
https://pubmed.ncbi.nlm.nih.gov/26568840	2015	acute	6	5	n/a	c57bl/6j	f	49	19	mouse		kanamycin,gentamicin,colistin,metronidazole,vancomycin+clindamycin+challenge	cumulativemortality	f	t	87	vpi10463	200000	cfu		100	1000	50 vancomycin + 50 metronidazole	mg/kg	qd	10	vancomycin+metronidazole	0.833333
https://pubmed.ncbi.nlm.nih.gov/26568840	2015	acute	6	4	n/a	c57bl/6j	f	49	19	mouse		kanamycin,gentamicin,colistin,metronidazole,vancomycin+clindamycin+challenge	cumulativemortality	f	t	87	vpi10463	200000	cfu		50	500	50	mg/kg	qd	10	metronidazole	0.666667
https://pubmed.ncbi.nlm.nih.gov/26568840	2015	acute	6	6	n/a	c57bl/6j	f	49	19	mouse		kanamycin,gentamicin,colistin,metronidazole,vancomycin+clindamycin+challenge	cumulativemortality	f	t	87	vpi10463	200000	cfu		50	500	50	mg/kg	qd	10	vancomycin	1
https://pubmed.ncbi.nlm.nih.gov/26568840	2015	acute	9	4	n/a	c57bl/6j	f	49	19	mouse		kanamycin,gentamicin,colistin,metronidazole,vancomycin+clindamycin+challenge	cumulativemortality	f	t	87	vpi10463	200000	cfu								infectedcontrol	0.444444
https://pubmed.ncbi.nlm.nih.gov/26568840	2015	sustained	6	4	n/a	c57bl/6j	f	49	19	mouse		kanamycin,gentamicin,colistin,metronidazole,vancomycin+clindamycin+challenge	cumulativemortality	f	t	87	vpi10463	200000	cfu		100	1000	50 vancomycin + 50 metronidazole	mg/kg	qd	10	vancomycin+metronidazole	0.666667
https://pubmed.ncbi.nlm.nih.gov/26568840	2015	sustained	6	4	n/a	c57bl/6j	f	49	19	mouse		kanamycin,gentamicin,colistin,metronidazole,vancomycin+clindamycin+challenge	cumulativemortality	f	t	87	vpi10463	200000	cfu		50	500	50	mg/kg	qd	10	metronidazole	0.666667
https://pubmed.ncbi.nlm.nih.gov/26568840	2015	sustained	6	3	n/a	c57bl/6j	f	49	19	mouse		kanamycin,gentamicin,colistin,metronidazole,vancomycin+clindamycin+challenge	cumulativemortality	f	t	87	vpi10463	200000	cfu		50	500	50	mg/kg	qd	10	vancomycin	0.5
https://pubmed.ncbi.nlm.nih.gov/26568840	2015	sustained	9	4	n/a	c57bl/6j	f	49	19	mouse		kanamycin,gentamicin,colistin,metronidazole,vancomycin+clindamycin+challenge	cumulativemortality	f	t	87	vpi10463	200000	cfu								infectedcontrol	0.444444
https://pubmed.ncbi.nlm.nih.gov/31849218	2020	acute	10	5	n/a	c57/b6	f	49		mouse		cefoperazone+clindamycin+challenge	cumulativemortality	f	t	87	vpi10463	8600000	cfu		20	140	20	mg/kg	qd	7	metronidazole	0.5
https://pubmed.ncbi.nlm.nih.gov/31849218	2020	acute	10	10	n/a	c57/b6	f	49		mouse		cefoperazone+clindamycin+challenge	cumulativemortality	f	t	87	vpi10463	8600000	cfu		20	140	20	mg/kg	qd	7	vancomycin	1
https://pubmed.ncbi.nlm.nih.gov/31849218	2020	acute	10	3	n/a	c57/b6	f	49		mouse		cefoperazone+clindamycin+challenge	cumulativemortality	f	t	87	vpi10463	8600000	cfu								vehiclecontrol	0.3
https://pubmed.ncbi.nlm.nih.gov/31849218	2020	sustained	10	5	n/a	c57/b6	f	49		mouse		cefoperazone+clindamycin+challenge	cumulativemortality	f	t	87	vpi10463	8600000	cfu		20	140	20	mg/kg	qd	7	metronidazole	0.5
https://pubmed.ncbi.nlm.nih.gov/31849218	2020	sustained	10	3	n/a	c57/b6	f	49		mouse		cefoperazone+clindamycin+challenge	cumulativemortality	f	t	87	vpi10463	8600000	cfu		20	140	20	mg/kg	qd	7	vancomycin	0.3
https://pubmed.ncbi.nlm.nih.gov/31849218	2020	sustained	10	3	n/a	c57/b6	f	49		mouse		cefoperazone+clindamycin+challenge	cumulativemortality	f	t	87	vpi10463	8600000	cfu								vehiclecontrol	0.3
https://pubmed.ncbi.nlm.nih.gov/27527088	2016	acute	10	10	spf	c57bl/6	n/a	56		mouse		cefoperazone+clindamycin+challenge	cumulativemortality	f	t	87	vpi10463	1000000	cfu	vegetative	20	100	10	mg/kg	bid	5	vancomycin	1
https://pubmed.ncbi.nlm.nih.gov/27527088	2016	acute	10	10	spf	c57bl/6	n/a	56		mouse		cefoperazone+clindamycin+challenge	cumulativemortality	f	p	87	vpi10463	1000000	cfu	vegetative	50	100	50	mg/kg	qd	2	actoxumab-bezlotoxumab	1
https://pubmed.ncbi.nlm.nih.gov/27527088	2016	acute	10	3	spf	c57bl/6	n/a	56		mouse		cefoperazone+clindamycin+challenge	cumulativemortality	f	t	87	vpi10463	1000000	cfu	vegetative							vehiclecontrol	0.3
https://pubmed.ncbi.nlm.nih.gov/27527088	2016	sustained	10	2	spf	c57bl/6	n/a	56		mouse		cefoperazone+clindamycin+challenge	cumulativemortality	f	t	87	vpi10463	1000000	cfu	vegetative	20	100	10	mg/kg	bid	5	vancomycin	0.2
https://pubmed.ncbi.nlm.nih.gov/27527088	2016	sustained	10	9	spf	c57bl/6	n/a	56		mouse		cefoperazone+clindamycin+challenge	cumulativemortality	f	p	87	vpi10463	1000000	cfu	vegetative	50	100	50	mg/kg	qd	2	actoxumab-bezlotoxumab	0.9
https://pubmed.ncbi.nlm.nih.gov/27527088	2016	sustained	10	3	spf	c57bl/6	n/a	56		mouse		cefoperazone+clindamycin+challenge	cumulativemortality	f	t	87	vpi10463	1000000	cfu	vegetative							vehiclecontrol	0.3
https://pubmed.ncbi.nlm.nih.gov/22585229	2012	acute	8	4	n/a	c57bl/6	m	56		mouse	aninhibitorofpyruvate:ferredoxinoxidoreductase(pfor)	vancomycin,colistin,gentamicin,metronidazole+clindamycin+challenge	cumulativemortality	f	t	87	vpi10463	10000	cfu		20	100	20	mg/kg	qd	5	amixicile	0.5
https://pubmed.ncbi.nlm.nih.gov/22585229	2012	acute	8	2	n/a	c57bl/6	m	56		mouse		vancomycin,colistin,gentamicin,metronidazole+clindamycin+challenge	cumulativemortality	f	t	87	vpi10463	10000	cfu		20	100	20	mg/kg	qd	5	nitazoxanide	0.25
https://pubmed.ncbi.nlm.nih.gov/22585229	2012	acute	8	8	n/a	c57bl/6	m	56		mouse		vancomycin,colistin,gentamicin,metronidazole+clindamycin+challenge	cumulativemortality	f	t	87	vpi10463	10000	cfu		20	100	20	mg/kg	qd	5	vancomycin	1
https://pubmed.ncbi.nlm.nih.gov/22585229	2012	acute	8	2	n/a	c57bl/6	m	56		mouse		vancomycin,colistin,gentamicin,metronidazole+clindamycin+challenge	cumulativemortality	f	t	87	vpi10463	10000	cfu		20	100	20	mg/kg	qd	5	vpc161183	0.25
https://pubmed.ncbi.nlm.nih.gov/22585229	2012	acute	8	2	n/a	c57bl/6	m	56		mouse		vancomycin,colistin,gentamicin,metronidazole+clindamycin+challenge	cumulativemortality	f	t	87	vpi10463	10000	cfu								control	0.25
https://pubmed.ncbi.nlm.nih.gov/22585229	2012	sustained	8	4	n/a	c57bl/6	m	56		mouse	aninhibitorofpyruvate:ferredoxinoxidoreductase(pfor)	vancomycin,colistin,gentamicin,metronidazole+clindamycin+challenge	cumulativemortality	f	t	87	vpi10463	10000	cfu		20	100	20	mg/kg	qd	5	amixicile	0.5
https://pubmed.ncbi.nlm.nih.gov/22585229	2012	sustained	8	2	n/a	c57bl/6	m	56		mouse		vancomycin,colistin,gentamicin,metronidazole+clindamycin+challenge	cumulativemortality	f	t	87	vpi10463	10000	cfu		20	100	20	mg/kg	qd	5	nitazoxanide	0.25
https://pubmed.ncbi.nlm.nih.gov/22585229	2012	sustained	8	1	n/a	c57bl/6	m	56		mouse		vancomycin,colistin,gentamicin,metronidazole+clindamycin+challenge	cumulativemortality	f	t	87	vpi10463	10000	cfu		20	100	20	mg/kg	qd	5	vancomycin	0.125
https://pubmed.ncbi.nlm.nih.gov/22585229	2012	sustained	8	2	n/a	c57bl/6	m	56		mouse		vancomycin,colistin,gentamicin,metronidazole+clindamycin+challenge	cumulativemortality	f	t	87	vpi10463	10000	cfu		20	100	20	mg/kg	qd	5	vpc161183	0.25
https://pubmed.ncbi.nlm.nih.gov/22585229	2012	sustained	8	2	n/a	c57bl/6	m	56		mouse		vancomycin,colistin,gentamicin,metronidazole+clindamycin+challenge	cumulativemortality	f	t	87	vpi10463	10000	cfu								control	0.25
https://pubmed.ncbi.nlm.nih.gov/23147742	2012	acute	16	10	n/a	c57bl/6	m	56		mouse		vancomycin,colistin,gentamicin,metronidazole+clindamycin+challenge	cumulativemortality	f	t	87	vpi10463	50000			20	100	20	mg/kg	qd	5	nitazoxanide	0.625
https://pubmed.ncbi.nlm.nih.gov/23147742	2012	acute	16	16	n/a	c57bl/6	m	56		mouse		vancomycin,colistin,gentamicin,metronidazole+clindamycin+challenge	cumulativemortality	f	t	87	vpi10463	50000			20	100	20	mg/kg	qd	5	vancomycin	1
https://pubmed.ncbi.nlm.nih.gov/23147742	2012	sustained	16	10	n/a	c57bl/6	m	56		mouse		vancomycin,colistin,gentamicin,metronidazole+clindamycin+challenge	cumulativemortality	f	t	87	vpi10463	50000			20	100	20	mg/kg	qd	5	nitazoxanide	0.625
https://pubmed.ncbi.nlm.nih.gov/23147742	2012	sustained	16	5	n/a	c57bl/6	m	56		mouse		vancomycin,colistin,gentamicin,metronidazole+clindamycin+challenge	cumulativemortality	f	t	87	vpi10463	50000			20	100	20	mg/kg	qd	5	vancomycin	0.3125
https://pubmed.ncbi.nlm.nih.gov/22585229	2012	acute	10	7	n/a	c57bl/6	m	56		mouse	aninhibitorofpyruvate:ferredoxinoxidoreductase(pfor)	vancomycin,colistin,gentamicin,metronidazole+clindamycin+challenge	cumulativemortality	f	t	87	vpi10463	100000	cfu		20	100	20	mg/kg	qd	5	amixicile	0.7
https://pubmed.ncbi.nlm.nih.gov/22585229	2012	acute	6	2	n/a	c57bl/6	m	56		mouse		vancomycin,colistin,gentamicin,metronidazole+clindamycin+challenge	cumulativemortality	f	t	87	vpi10463	100000	cfu		20	100	20	mg/kg	qd	5	amixicile+vancomycin	0.333333
https://pubmed.ncbi.nlm.nih.gov/22585229	2012	acute	10	8	n/a	c57bl/6	m	56		mouse		vancomycin,colistin,gentamicin,metronidazole+clindamycin+challenge	cumulativemortality	f	t	87	vpi10463	100000	cfu		20	100	20	mg/kg	qd	5	fidaxomicin	0.8
https://pubmed.ncbi.nlm.nih.gov/22585229	2012	acute	10	8	n/a	c57bl/6	m	56		mouse		vancomycin,colistin,gentamicin,metronidazole+clindamycin+challenge	cumulativemortality	f	t	87	vpi10463	100000	cfu		20	100	20	mg/kg	qd	5	vancomycin	0.8
https://pubmed.ncbi.nlm.nih.gov/22585229	2012	acute	10	0	n/a	c57bl/6	m	56		mouse		vancomycin,colistin,gentamicin,metronidazole+clindamycin+challenge	cumulativemortality	f	t	87	vpi10463	100000	cfu								control	0
https://pubmed.ncbi.nlm.nih.gov/22585229	2012	sustained	10	7	n/a	c57bl/6	m	56		mouse	aninhibitorofpyruvate:ferredoxinoxidoreductase(pfor)	vancomycin,colistin,gentamicin,metronidazole+clindamycin+challenge	cumulativemortality	f	t	87	vpi10463	100000	cfu		20	100	20	mg/kg	qd	5	amixicile	0.7
https://pubmed.ncbi.nlm.nih.gov/22585229	2012	sustained	6	1	n/a	c57bl/6	m	56		mouse		vancomycin,colistin,gentamicin,metronidazole+clindamycin+challenge	cumulativemortality	f	t	87	vpi10463	100000	cfu		20	100	20	mg/kg	qd	5	amixicile+vancomycin	0.166667
https://pubmed.ncbi.nlm.nih.gov/22585229	2012	sustained	10	2	n/a	c57bl/6	m	56		mouse		vancomycin,colistin,gentamicin,metronidazole+clindamycin+challenge	cumulativemortality	f	t	87	vpi10463	100000	cfu		20	100	20	mg/kg	qd	5	fidaxomicin	0.2
https://pubmed.ncbi.nlm.nih.gov/22585229	2012	sustained	10	3	n/a	c57bl/6	m	56		mouse		vancomycin,colistin,gentamicin,metronidazole+clindamycin+challenge	cumulativemortality	f	t	87	vpi10463	100000	cfu		20	100	20	mg/kg	qd	5	vancomycin	0.3
https://pubmed.ncbi.nlm.nih.gov/22585229	2012	sustained	10	0	n/a	c57bl/6	m	56		mouse		vancomycin,colistin,gentamicin,metronidazole+clindamycin+challenge	cumulativemortality	f	t	87	vpi10463	100000	cfu								control	0
https://pubmed.ncbi.nlm.nih.gov/23147742	2012	acute	8	2	n/a	c57bl/6	m	56		mouse		vancomycin,colistin,gentamicin,metronidazole+clindamycin+challenge	cumulativemortality	f	t	87	vpi10463	100000									control	0.25
https://pubmed.ncbi.nlm.nih.gov/23147742	2012	acute	8	8	n/a	c57bl/6	m	56		mouse		vancomycin,colistin,gentamicin,metronidazole+clindamycin+challenge	cumulativemortality	f	t	87	vpi10463	100000			50	50	50	mg/kg	qd	1	vancomycin	1
https://pubmed.ncbi.nlm.nih.gov/23147742	2012	acute	8	8	n/a	c57bl/6	m	56		mouse		vancomycin,colistin,gentamicin,metronidazole+clindamycin+challenge	cumulativemortality	f	t	87	vpi10463	100000			50	100	50	mg/kg	qd	2	vancomycin	1
https://pubmed.ncbi.nlm.nih.gov/23147742	2012	acute	8	8	n/a	c57bl/6	m	56		mouse		vancomycin,colistin,gentamicin,metronidazole+clindamycin+challenge	cumulativemortality	f	t	87	vpi10463	100000			50	150	50	mg/kg	qd	3	vancomycin	1
https://pubmed.ncbi.nlm.nih.gov/23147742	2012	acute	8	7	n/a	c57bl/6	m	56		mouse		vancomycin,colistin,gentamicin,metronidazole+clindamycin+challenge	cumulativemortality	f	t	87	vpi10463	100000			50	250	50	mg/kg	qd	5	vancomycin	0.875
https://pubmed.ncbi.nlm.nih.gov/23147742	2012	sustained	8	2	n/a	c57bl/6	m	56		mouse		vancomycin,colistin,gentamicin,metronidazole+clindamycin+challenge	cumulativemortality	f	t	87	vpi10463	100000									control	0.25
https://pubmed.ncbi.nlm.nih.gov/23147742	2012	sustained	8	4	n/a	c57bl/6	m	56		mouse		vancomycin,colistin,gentamicin,metronidazole+clindamycin+challenge	cumulativemortality	f	t	87	vpi10463	100000			50	50	50	mg/kg	qd	1	vancomycin	0.5
https://pubmed.ncbi.nlm.nih.gov/23147742	2012	sustained	8	2	n/a	c57bl/6	m	56		mouse		vancomycin,colistin,gentamicin,metronidazole+clindamycin+challenge	cumulativemortality	f	t	87	vpi10463	100000			50	100	50	mg/kg	qd	2	vancomycin	0.25
https://pubmed.ncbi.nlm.nih.gov/23147742	2012	sustained	8	1	n/a	c57bl/6	m	56		mouse		vancomycin,colistin,gentamicin,metronidazole+clindamycin+challenge	cumulativemortality	f	t	87	vpi10463	100000			50	150	50	mg/kg	qd	3	vancomycin	0.125
https://pubmed.ncbi.nlm.nih.gov/23147742	2012	sustained	8	0	n/a	c57bl/6	m	56		mouse		vancomycin,colistin,gentamicin,metronidazole+clindamycin+challenge	cumulativemortality	f	t	87	vpi10463	100000			50	250	50	mg/kg	qd	5	vancomycin	0
https://pubmed.ncbi.nlm.nih.gov/23147742	2012	acute	6	2	n/a	c57bl/6	m	56		mouse		vancomycin,colistin,gentamicin,metronidazole+clindamycin+challenge	cumulativemortality	f	t	87	vpi10463	100000									vancomycin	0.333333
https://pubmed.ncbi.nlm.nih.gov/23147742	2012	acute	6	6	n/a	c57bl/6	m	56		mouse		vancomycin,colistin,gentamicin,metronidazole+clindamycin+challenge	cumulativemortality	f	t	87	vpi10463	100000			20	100	20	mg/kg	qd	5	vancomycin	1
https://pubmed.ncbi.nlm.nih.gov/23147742	2012	acute	6	6	n/a	c57bl/6	m	56		mouse		vancomycin,colistin,gentamicin,metronidazole+clindamycin+challenge	cumulativemortality	f	t	87	vpi10463	100000			20	200	20	mg/kg	qd	10	vancomycin	1
https://pubmed.ncbi.nlm.nih.gov/23147742	2012	sustained	6	2	n/a	c57bl/6	m	56		mouse		vancomycin,colistin,gentamicin,metronidazole+clindamycin+challenge	cumulativemortality	f	t	87	vpi10463	100000									vancomycin	0.333333
https://pubmed.ncbi.nlm.nih.gov/23147742	2012	sustained	6	2	n/a	c57bl/6	m	56		mouse		vancomycin,colistin,gentamicin,metronidazole+clindamycin+challenge	cumulativemortality	f	t	87	vpi10463	100000			20	100	20	mg/kg	qd	5	vancomycin	0.333333
https://pubmed.ncbi.nlm.nih.gov/23147742	2012	sustained	6	0	n/a	c57bl/6	m	56		mouse		vancomycin,colistin,gentamicin,metronidazole+clindamycin+challenge	cumulativemortality	f	t	87	vpi10463	100000			20	200	20	mg/kg	qd	10	vancomycin	0
https://pubmed.ncbi.nlm.nih.gov/23147742	2012	acute	6	5	n/a	c57bl/6	m	56		mouse		vancomycin,colistin,gentamicin,metronidazole+clindamycin+challenge	cumulativemortality	f	t	87	vpi10463	100000			20	100	20	mg/kg	qd	5	metronidazole	0.833333
https://pubmed.ncbi.nlm.nih.gov/23147742	2012	acute	6	6	n/a	c57bl/6	m	56		mouse		vancomycin,colistin,gentamicin,metronidazole+clindamycin+challenge	cumulativemortality	f	t	87	vpi10463	100000			20	100	20	mg/kg	qd	5	fidaxomicin	1
https://pubmed.ncbi.nlm.nih.gov/23147742	2012	sustained	6	5	n/a	c57bl/6	m	56		mouse		vancomycin,colistin,gentamicin,metronidazole+clindamycin+challenge	cumulativemortality	f	t	87	vpi10463	100000			20	100	20	mg/kg	qd	5	metronidazole	0.833333
https://pubmed.ncbi.nlm.nih.gov/23147742	2012	sustained	6	1	n/a	c57bl/6	m	56		mouse		vancomycin,colistin,gentamicin,metronidazole+clindamycin+challenge	cumulativemortality	f	t	87	vpi10463	100000			20	100	20	mg/kg	qd	5	fidaxomicin	0.166667
https://pubmed.ncbi.nlm.nih.gov/23217055	2012	acute	6	1	n/a	c57bl/6	m	56		mouse		vancomycin,colistin,gentamicin,metronidazole+clindamycin+challenge	cumulativemortality	f	t	87	vpi10463	100000	cfu		50	150	50	mg/kg	qd	3	atl370	0.166667
https://pubmed.ncbi.nlm.nih.gov/23217055	2012	acute	6	6	n/a	c57bl/6	m	56		mouse		vancomycin,colistin,gentamicin,metronidazole+clindamycin+challenge	cumulativemortality	f	t	87	vpi10463	100000	cfu		50	150	50	mg/kg	qd	3	vancomycin	1
https://pubmed.ncbi.nlm.nih.gov/23217055	2012	acute	6	6	n/a	c57bl/6	m	56		mouse		vancomycin,colistin,gentamicin,metronidazole+clindamycin+challenge	cumulativemortality	f	t	87	vpi10463	100000	cfu		50	150	50	mg/kg	qd	3	vancomycin+atl370	1
https://pubmed.ncbi.nlm.nih.gov/23217055	2012	sustained	6	1	n/a	c57bl/6	m	56		mouse		vancomycin,colistin,gentamicin,metronidazole+clindamycin+challenge	cumulativemortality	f	t	87	vpi10463	100000	cfu		50	150	50	mg/kg	qd	3	atl370	0.166667
https://pubmed.ncbi.nlm.nih.gov/23217055	2012	sustained	6	0	n/a	c57bl/6	m	56		mouse		vancomycin,colistin,gentamicin,metronidazole+clindamycin+challenge	cumulativemortality	f	t	87	vpi10463	100000	cfu		50	150	50	mg/kg	qd	3	vancomycin	0
https://pubmed.ncbi.nlm.nih.gov/23217055	2012	sustained	6	2	n/a	c57bl/6	m	56		mouse		vancomycin,colistin,gentamicin,metronidazole+clindamycin+challenge	cumulativemortality	f	t	87	vpi10463	100000	cfu		50	150	50	mg/kg	qd	3	vancomycin+atl370	0.333333
https://pubmed.ncbi.nlm.nih.gov/26832756	2016	acute	19	19	n/a	c57bl/6	m	56		mouse		vancomycin,colistin,gentamicin,metronidazole+clindamycin+challenge	cumulativemortality	f	t	87	vpi10463	100000	cfu	vegetative	20	100	20	mg/kg	qd	5	vancomycin	1
https://pubmed.ncbi.nlm.nih.gov/26832756	2016	acute	44	6	n/a	c57bl/6	m	56		mouse		vancomycin,colistin,gentamicin,metronidazole+clindamycin+challenge	cumulativemortality	f	t	87	vpi10463	100000	cfu	vegetative							vehiclecontrol	0.136364
https://pubmed.ncbi.nlm.nih.gov/26832756	2016	sustained	19	7	n/a	c57bl/6	m	56		mouse		vancomycin,colistin,gentamicin,metronidazole+clindamycin+challenge	cumulativemortality	f	t	87	vpi10463	100000	cfu	vegetative	20	100	20	mg/kg	qd	5	vancomycin	0.368421
https://pubmed.ncbi.nlm.nih.gov/26832756	2016	sustained	44	6	n/a	c57bl/6	m	56		mouse		vancomycin,colistin,gentamicin,metronidazole+clindamycin+challenge	cumulativemortality	f	t	87	vpi10463	100000	cfu	vegetative							vehiclecontrol	0.136364
https://pubmed.ncbi.nlm.nih.gov/29109161	2017	acute	5	3	n/a	c57bl/6	f	56		mouse		kanamycin,gentamicin,colistin,metronidazole,vancomycin+clindamycin+challenge	cumulativemortality	f	t	87	vpi10463	1000000	cfu	vegetative	20	100	20	mg/kg	qd	5	vancomycin	0.6
https://pubmed.ncbi.nlm.nih.gov/29109161	2017	acute	7	0	n/a	c57bl/6	f	56		mouse		kanamycin,gentamicin,colistin,metronidazole,vancomycin+clindamycin+challenge	cumulativemortality	f	t	87	vpi10463	1000000	cfu	vegetative							pbscontrol	0
https://pubmed.ncbi.nlm.nih.gov/30482680	2018	acute	14	13	n/a	c57bl/6j	f	63		mouse		kanamycin,gentamicin,colistin,metronidazole,vancomycin+clindamycin+challenge	cumulativemortality	f	t	87	vpi10463	500000		spores	1.8	7.2	0.6	mg/kg	tid	4	it2s4	0.928571
https://pubmed.ncbi.nlm.nih.gov/30482680	2018	acute	17	17	n/a	c57bl/6j	f	63		mouse		kanamycin,gentamicin,colistin,metronidazole,vancomycin+clindamycin+challenge	cumulativemortality	f	t	87	vpi10463	500000		spores	36	144	12	mg/kg	tid	4	it2s4	1
https://pubmed.ncbi.nlm.nih.gov/30482680	2018	acute	12	12	n/a	c57bl/6j	f	63		mouse		kanamycin,gentamicin,colistin,metronidazole,vancomycin+clindamycin+challenge	cumulativemortality	f	t	87	vpi10463	500000		spores	900	3600	300	mg/kg	tid	4	it2s4	1
https://pubmed.ncbi.nlm.nih.gov/30482680	2018	acute	18	18	n/a	c57bl/6j	f	63		mouse		kanamycin,gentamicin,colistin,metronidazole,vancomycin+clindamycin+challenge	cumulativemortality	f	t	87	vpi10463	500000		spores	50	250	50	mg/kg	qd	5	vancomycin	1
https://pubmed.ncbi.nlm.nih.gov/30482680	2018	acute	14	14	n/a	c57bl/6j	f	63		mouse		kanamycin,gentamicin,colistin,metronidazole,vancomycin+clindamycin+challenge	cumulativemortality	f	t	87	vpi10463	500000		spores	18	72	6	mg/kg	tid	4	it2s4	1
https://pubmed.ncbi.nlm.nih.gov/30482680	2018	acute	25	25	n/a	c57bl/6j	f	63		mouse		kanamycin,gentamicin,colistin,metronidazole,vancomycin+clindamycin+challenge	cumulativemortality	f	t	87	vpi10463	500000		spores	180	720	60	mg/kg	tid	4	it2s4	1
https://pubmed.ncbi.nlm.nih.gov/30482680	2018	sustained	14	6	n/a	c57bl/6j	f	63		mouse		kanamycin,gentamicin,colistin,metronidazole,vancomycin+clindamycin+challenge	cumulativemortality	f	t	87	vpi10463	500000		spores	1.8	7.2	0.6	mg/kg	tid	4	it2s4	0.428571
https://pubmed.ncbi.nlm.nih.gov/30482680	2018	sustained	17	7	n/a	c57bl/6j	f	63		mouse		kanamycin,gentamicin,colistin,metronidazole,vancomycin+clindamycin+challenge	cumulativemortality	f	t	87	vpi10463	500000		spores	36	144	12	mg/kg	tid	4	it2s4	0.411765
https://pubmed.ncbi.nlm.nih.gov/30482680	2018	sustained	12	4	n/a	c57bl/6j	f	63		mouse		kanamycin,gentamicin,colistin,metronidazole,vancomycin+clindamycin+challenge	cumulativemortality	f	t	87	vpi10463	500000		spores	900	3600	300	mg/kg	tid	4	it2s4	0.333333
https://pubmed.ncbi.nlm.nih.gov/30482680	2018	sustained	18	7	n/a	c57bl/6j	f	63		mouse		kanamycin,gentamicin,colistin,metronidazole,vancomycin+clindamycin+challenge	cumulativemortality	f	t	87	vpi10463	500000		spores	50	250	50	mg/kg	qd	5	vancomycin	0.388889
https://pubmed.ncbi.nlm.nih.gov/30482680	2018	sustained	14	11	n/a	c57bl/6j	f	63		mouse		kanamycin,gentamicin,colistin,metronidazole,vancomycin+clindamycin+challenge	cumulativemortality	f	t	87	vpi10463	500000		spores	18	72	6	mg/kg	tid	4	it2s4	0.785714
https://pubmed.ncbi.nlm.nih.gov/30482680	2018	sustained	25	9	n/a	c57bl/6j	f	63		mouse		kanamycin,gentamicin,colistin,metronidazole,vancomycin+clindamycin+challenge	cumulativemortality	f	t	87	vpi10463	500000		spores	180	720	60	mg/kg	tid	4	it2s4	0.36
https://pubmed.ncbi.nlm.nih.gov/24277020	2014	acute	107	50	n/a	c57bl/6	f	70		mouse		kanamycin,gentamicin,colistin,metronidazole,vancomycin+clindamycin+challenge	cumulativemortality	t	t	87	vpi10463	100000	cfu	spores	0.2	1	0.1	mg/kg	bid	5	cadazolid	0.46729
https://pubmed.ncbi.nlm.nih.gov/24277020	2014	acute	11	1	n/a	c57bl/6	f	70		mouse		kanamycin,gentamicin,colistin,metronidazole,vancomycin+clindamycin+challenge	cumulativemortality	t	t	87	vpi10463	100000	cfu	spores	0.2	1	0.1	mg/kg	bid	5	vancomycin	0.0909091
https://pubmed.ncbi.nlm.nih.gov/24277020	2014	acute	114	110	n/a	c57bl/6	f	70		mouse		kanamycin,gentamicin,colistin,metronidazole,vancomycin+clindamycin+challenge	cumulativemortality	t	t	87	vpi10463	100000	cfu	spores	2	10	1	mg/kg	bid	5	cadazolid	0.964912
https://pubmed.ncbi.nlm.nih.gov/24277020	2014	acute	17	15	n/a	c57bl/6	f	70		mouse		kanamycin,gentamicin,colistin,metronidazole,vancomycin+clindamycin+challenge	cumulativemortality	t	t	87	vpi10463	100000	cfu	spores	2	10	1	mg/kg	bid	5	vancomycin	0.882353
https://pubmed.ncbi.nlm.nih.gov/24277020	2014	acute	107	107	n/a	c57bl/6	f	70		mouse		kanamycin,gentamicin,colistin,metronidazole,vancomycin+clindamycin+challenge	cumulativemortality	t	t	87	vpi10463	100000	cfu	spores	20	100	10	mg/kg	bid	5	cadazolid	1
https://pubmed.ncbi.nlm.nih.gov/24277020	2014	acute	11	11	n/a	c57bl/6	f	70		mouse		kanamycin,gentamicin,colistin,metronidazole,vancomycin+clindamycin+challenge	cumulativemortality	t	t	87	vpi10463	100000	cfu	spores	20	100	10	mg/kg	bid	5	vancomycin	1
https://pubmed.ncbi.nlm.nih.gov/24277020	2014	acute	137	24	n/a	c57bl/6	f	70		mouse		kanamycin,gentamicin,colistin,metronidazole,vancomycin+clindamycin+challenge	cumulativemortality	t	t	87	vpi10463	100000	cfu	spores							cadazolidcontrol	0.175182
https://pubmed.ncbi.nlm.nih.gov/24277020	2014	acute	16	2	n/a	c57bl/6	f	70		mouse		kanamycin,gentamicin,colistin,metronidazole,vancomycin+clindamycin+challenge	cumulativemortality	t	t	87	vpi10463	100000	cfu	spores							vancomycincontrol	0.125
https://pubmed.ncbi.nlm.nih.gov/24277020	2014	sustained	107	43	n/a	c57bl/6	f	70		mouse		kanamycin,gentamicin,colistin,metronidazole,vancomycin+clindamycin+challenge	cumulativemortality	t	t	87	vpi10463	100000	cfu	spores	0.2	1	0.1	mg/kg	bid	5	cadazolid	0.401869
https://pubmed.ncbi.nlm.nih.gov/24277020	2014	sustained	11	1	n/a	c57bl/6	f	70		mouse		kanamycin,gentamicin,colistin,metronidazole,vancomycin+clindamycin+challenge	cumulativemortality	t	t	87	vpi10463	100000	cfu	spores	0.2	1	0.1	mg/kg	bid	5	vancomycin	0.0909091
https://pubmed.ncbi.nlm.nih.gov/24277020	2014	sustained	114	105	n/a	c57bl/6	f	70		mouse		kanamycin,gentamicin,colistin,metronidazole,vancomycin+clindamycin+challenge	cumulativemortality	t	t	87	vpi10463	100000	cfu	spores	2	10	1	mg/kg	bid	5	cadazolid	0.921053
https://pubmed.ncbi.nlm.nih.gov/24277020	2014	sustained	17	12	n/a	c57bl/6	f	70		mouse		kanamycin,gentamicin,colistin,metronidazole,vancomycin+clindamycin+challenge	cumulativemortality	t	t	87	vpi10463	100000	cfu	spores	2	10	1	mg/kg	bid	5	vancomycin	0.705882
https://pubmed.ncbi.nlm.nih.gov/24277020	2014	sustained	107	94	n/a	c57bl/6	f	70		mouse		kanamycin,gentamicin,colistin,metronidazole,vancomycin+clindamycin+challenge	cumulativemortality	t	t	87	vpi10463	100000	cfu	spores	20	100	10	mg/kg	bid	5	cadazolid	0.878505
https://pubmed.ncbi.nlm.nih.gov/24277020	2014	sustained	11	9	n/a	c57bl/6	f	70		mouse		kanamycin,gentamicin,colistin,metronidazole,vancomycin+clindamycin+challenge	cumulativemortality	t	t	87	vpi10463	100000	cfu	spores	20	100	10	mg/kg	bid	5	vancomycin	0.818182
https://pubmed.ncbi.nlm.nih.gov/24277020	2014	sustained	137	17	n/a	c57bl/6	f	70		mouse		kanamycin,gentamicin,colistin,metronidazole,vancomycin+clindamycin+challenge	cumulativemortality	t	t	87	vpi10463	100000	cfu	spores							cadazolidcontrol	0.124088
https://pubmed.ncbi.nlm.nih.gov/24277020	2014	sustained	16	2	n/a	c57bl/6	f	70		mouse		kanamycin,gentamicin,colistin,metronidazole,vancomycin+clindamycin+challenge	cumulativemortality	t	t	87	vpi10463	100000	cfu	spores							vancomycincontrol	0.125
https://pubmed.ncbi.nlm.nih.gov/18848941	2008	acute	12	12	n/a	c57bl/6	f	63		mouse		kanamycin,gentamicin,colistin,metronidazole,vancomycin+clindamycin+challenge	cumulativemortality	t	p	87	vpi10463	10000	cfu		50	50	50	mg/kg	qd	1	vancomycin	1
https://pubmed.ncbi.nlm.nih.gov/18848941	2008	acute	12	6	n/a	c57bl/6	f	63		mouse		kanamycin,gentamicin,colistin,metronidazole,vancomycin+clindamycin+challenge	cumulativemortality	t	p	87	vpi10463	10000	cfu								control	0.5
https://pubmed.ncbi.nlm.nih.gov/18848941	2008	sustained	12	5	n/a	c57bl/6	f	63		mouse		kanamycin,gentamicin,colistin,metronidazole,vancomycin+clindamycin+challenge	cumulativemortality	t	p	87	vpi10463	10000	cfu		50	50	50	mg/kg	qd	1	vancomycin	0.416667
https://pubmed.ncbi.nlm.nih.gov/18848941	2008	sustained	12	6	n/a	c57bl/6	f	63		mouse		kanamycin,gentamicin,colistin,metronidazole,vancomycin+clindamycin+challenge	cumulativemortality	t	p	87	vpi10463	10000	cfu								control	0.5
https://pubmed.ncbi.nlm.nih.gov/33202811	2020	acute	9	8	n/a	goldensyrian	f		95	hamster		clindamycin+challenge	cumulativemortality	f	p	27	cd13-12	5000	cfu	spores	1000000	1000000	10^6	spores	qd	1	pcd130+027	0.888889
https://pubmed.ncbi.nlm.nih.gov/33202811	2020	acute	9	8	n/a	goldensyrian	f		95	hamster		clindamycin+challenge	cumulativemortality	f	p	27	cd13-12	5000	cfu	spores	1000000	1000000	10^6	spores	qd	1	pcd182+027	0.888889
https://pubmed.ncbi.nlm.nih.gov/33202811	2020	acute	8	0	n/a	goldensyrian	f		95	hamster		clindamycin+challenge	cumulativemortality	f	p	27	cd13-12	5000	cfu	spores							negativecontrol	0
https://pubmed.ncbi.nlm.nih.gov/33202811	2020	sustained	9	5	n/a	goldensyrian	f		95	hamster		clindamycin+challenge	cumulativemortality	f	p	27	cd13-12	5000	cfu	spores	1000000	1000000	10^6	spores	qd	1	pcd130+027	0.555556
https://pubmed.ncbi.nlm.nih.gov/33202811	2020	sustained	9	8	n/a	goldensyrian	f		95	hamster		clindamycin+challenge	cumulativemortality	f	p	27	cd13-12	5000	cfu	spores	1000000	1000000	10^6	spores	qd	1	pcd182+027	0.888889
https://pubmed.ncbi.nlm.nih.gov/33202811	2020	sustained	8	0	n/a	goldensyrian	f		95	hamster		clindamycin+challenge	cumulativemortality	f	p	27	cd13-12	5000	cfu	spores							negativecontrol	0
https://pubmed.ncbi.nlm.nih.gov/22802252	2012	acute	33	32	n/a	goldensyrian	m			hamster		clindamycin+challenge	cumulativemortality	t	t	12	atcc43596	20		spores	20	100	10	mg/kg	bid	5	cb-183,315	0.969697
https://pubmed.ncbi.nlm.nih.gov/22802252	2012	acute	24	24	n/a	goldensyrian	m			hamster		clindamycin+challenge	cumulativemortality	t	t	12	atcc43596	20		spores	20	100	10	mg/kg	bid	5	vancomycin	1
https://pubmed.ncbi.nlm.nih.gov/22802252	2012	acute	32	32	n/a	goldensyrian	m			hamster		clindamycin+challenge	cumulativemortality	t	t	12	atcc43596	20		spores	4	20	2	mg/kg	bid	5	cb-183,315	1
https://pubmed.ncbi.nlm.nih.gov/22802252	2012	acute	24	24	n/a	goldensyrian	m			hamster		clindamycin+challenge	cumulativemortality	t	t	12	atcc43596	20		spores	4	20	2	mg/kg	bid	5	vancomycin	1
https://pubmed.ncbi.nlm.nih.gov/22802252	2012	acute	16	16	n/a	goldensyrian	m			hamster		clindamycin+challenge	cumulativemortality	t	t	12	atcc43596	20		spores	50	250	25	mg/kg	bid	5	cb-183,315	1
https://pubmed.ncbi.nlm.nih.gov/22802252	2012	acute	16	16	n/a	goldensyrian	m			hamster		clindamycin+challenge	cumulativemortality	t	t	12	atcc43596	20		spores	50	250	25	mg/kg	bid	5	vancomycin	1
https://pubmed.ncbi.nlm.nih.gov/22802252	2012	acute	15	0	n/a	goldensyrian	m			hamster		clindamycin+challenge	cumulativemortality	t	t	12	atcc43596	20		spores							control	0
https://pubmed.ncbi.nlm.nih.gov/22802252	2012	sustained	33	25	n/a	goldensyrian	m			hamster		clindamycin+challenge	cumulativemortality	t	t	12	atcc43596	20		spores	20	100	10	mg/kg	bid	5	cb-183,315	0.757576
https://pubmed.ncbi.nlm.nih.gov/22802252	2012	sustained	24	21	n/a	goldensyrian	m			hamster		clindamycin+challenge	cumulativemortality	t	t	12	atcc43596	20		spores	20	100	10	mg/kg	bid	5	vancomycin	0.875
https://pubmed.ncbi.nlm.nih.gov/22802252	2012	sustained	32	16	n/a	goldensyrian	m			hamster		clindamycin+challenge	cumulativemortality	t	t	12	atcc43596	20		spores	4	20	2	mg/kg	bid	5	cb-183,315	0.5
https://pubmed.ncbi.nlm.nih.gov/22802252	2012	sustained	24	13	n/a	goldensyrian	m			hamster		clindamycin+challenge	cumulativemortality	t	t	12	atcc43596	20		spores	4	20	2	mg/kg	bid	5	vancomycin	0.541667
https://pubmed.ncbi.nlm.nih.gov/22802252	2012	sustained	16	13	n/a	goldensyrian	m			hamster		clindamycin+challenge	cumulativemortality	t	t	12	atcc43596	20		spores	50	250	25	mg/kg	bid	5	cb-183,315	0.8125
https://pubmed.ncbi.nlm.nih.gov/22802252	2012	sustained	16	11	n/a	goldensyrian	m			hamster		clindamycin+challenge	cumulativemortality	t	t	12	atcc43596	20		spores	50	250	25	mg/kg	bid	5	vancomycin	0.6875
https://pubmed.ncbi.nlm.nih.gov/22802252	2012	sustained	15	0	n/a	goldensyrian	m			hamster		clindamycin+challenge	cumulativemortality	t	t	12	atcc43596	20		spores							control	0
https://pubmed.ncbi.nlm.nih.gov/25993059	2015	acute	8	8	n/a	goldensyrian	m			hamster		clindamycin+challenge	cumulativemortality	f	t	12	atcc43596	20		spores	0.5	2.5	0.5	mg/kg	qd	5	surotomycin	1
https://pubmed.ncbi.nlm.nih.gov/25993059	2015	acute	8	8	n/a	goldensyrian	m			hamster		clindamycin+challenge	cumulativemortality	f	t	12	atcc43596	20		spores	0.5	2.5	0.5	mg/kg	qd	5	vancomycin	1
https://pubmed.ncbi.nlm.nih.gov/25993059	2015	acute	5	0	n/a	goldensyrian	m			hamster		clindamycin+challenge	cumulativemortality	f	t	12	atcc43596	20		spores							vehiclecontrol	0
https://pubmed.ncbi.nlm.nih.gov/25993059	2015	sustained	8	8	n/a	goldensyrian	m			hamster		clindamycin+challenge	cumulativemortality	f	t	12	atcc43596	20		spores	0.5	2.5	0.5	mg/kg	qd	5	surotomycin	1
https://pubmed.ncbi.nlm.nih.gov/25993059	2015	sustained	8	2	n/a	goldensyrian	m			hamster		clindamycin+challenge	cumulativemortality	f	t	12	atcc43596	20		spores	0.5	2.5	0.5	mg/kg	qd	5	vancomycin	0.25
https://pubmed.ncbi.nlm.nih.gov/25993059	2015	sustained	5	0	n/a	goldensyrian	m			hamster		clindamycin+challenge	cumulativemortality	f	t	12	atcc43596	20		spores							vehiclecontrol	0
https://pubmed.ncbi.nlm.nih.gov/24514098	2014	acute	5	4	n/a	goldensyrian	m		98	hamster	inhibitoroftypeiitopoisomeraseenzymes	clindamycin+challenge	cumulativemortality	t	t	53	b1	53		spores	3.12	12.48	1.56	mg/kg	bid	4	kibdelomycin	0.8
https://pubmed.ncbi.nlm.nih.gov/24514098	2014	acute	5	5	n/a	goldensyrian	m		98	hamster	inhibitoroftypeiitopoisomeraseenzymes	clindamycin+challenge	cumulativemortality	t	t	53	b1	53		spores	25	100	12.5	mg/kg	bid	4	kibdelomycin	1
https://pubmed.ncbi.nlm.nih.gov/24514098	2014	acute	5	5	n/a	goldensyrian	m		98	hamster	inhibitoroftypeiitopoisomeraseenzymes	clindamycin+challenge	cumulativemortality	t	t	53	b1	53		spores	12.5	50	6.25	mg/kg	bid	4	kibdelomycin	1
https://pubmed.ncbi.nlm.nih.gov/24514098	2014	acute	5	5	n/a	goldensyrian	m		98	hamster	inhibitoroftypeiitopoisomeraseenzymes	clindamycin+challenge	cumulativemortality	t	t	53	b1	53		spores	12.5	50	6.25	mg/kg	bid	4	vancomycin	1
https://pubmed.ncbi.nlm.nih.gov/24514098	2014	sustained	5	4	n/a	goldensyrian	m		98	hamster	inhibitoroftypeiitopoisomeraseenzymes	clindamycin+challenge	cumulativemortality	t	t	53	b1	53		spores	3.12	12.48	1.56	mg/kg	bid	4	kibdelomycin	0.8
https://pubmed.ncbi.nlm.nih.gov/24514098	2014	sustained	5	5	n/a	goldensyrian	m		98	hamster	inhibitoroftypeiitopoisomeraseenzymes	clindamycin+challenge	cumulativemortality	t	t	53	b1	53		spores	25	100	12.5	mg/kg	bid	4	kibdelomycin	1
https://pubmed.ncbi.nlm.nih.gov/24514098	2014	sustained	5	5	n/a	goldensyrian	m		98	hamster	inhibitoroftypeiitopoisomeraseenzymes	clindamycin+challenge	cumulativemortality	t	t	53	b1	53		spores	12.5	50	6.25	mg/kg	bid	4	kibdelomycin	1
https://pubmed.ncbi.nlm.nih.gov/24514098	2014	sustained	5	5	n/a	goldensyrian	m		98	hamster	inhibitoroftypeiitopoisomeraseenzymes	clindamycin+challenge	cumulativemortality	t	t	53	b1	53		spores	12.5	50	6.25	mg/kg	bid	4	vancomycin	1
https://pubmed.ncbi.nlm.nih.gov/16966409	2006	acute	50	12	n/a	swisswebster	n/a			mouse	antibody	toxinaintraperitoneally	survival	f	p	87	vpi10463	100	ngtoxina				100 to 250	ug			1b11	0.24
https://pubmed.ncbi.nlm.nih.gov/16966409	2006	acute	70	52	n/a	swisswebster	n/a			mouse	antibody	toxinaintraperitoneally	survival	f	p	87	vpi10463	100	ngtoxina				100 to 250	ug			3h2	0.742857
https://pubmed.ncbi.nlm.nih.gov/16966409	2006	acute	90	60	n/a	swisswebster	n/a			mouse	antibody	toxinaintraperitoneally	survival	f	p	87	vpi10463	100	ngtoxina				100 to 250	ug			cda1	0.666667
https://pubmed.ncbi.nlm.nih.gov/16966409	2006	acute	105	24	n/a	swisswebster	n/a			mouse	antibody	toxinaintraperitoneally	survival	f	p	87	vpi10463	100	ngtoxina								control-irrelevanthumab	0.228571
https://pubmed.ncbi.nlm.nih.gov/16966409	2006	acute	17	3	n/a	goldensyrian	n/a		75	hamster		clindamycin+challenge	cumulativemortality	f	p	87	vpi10463	140	cfu	spores			10 to 50	mg/kg	qd	4	mdx1388	0.176471
https://pubmed.ncbi.nlm.nih.gov/16966409	2006	acute	42	23	n/a	goldensyrian	n/a		75	hamster		clindamycin+challenge	cumulativemortality	f	p	87	vpi10463	140	cfu	spores	50	200	50	mg/kg	qd	4	cda1	0.547619
https://pubmed.ncbi.nlm.nih.gov/16966409	2006	acute	65	61	n/a	goldensyrian	n/a		75	hamster		clindamycin+challenge	cumulativemortality	f	p	87	vpi10463	140	cfu	spores			50 CDA1 + 10 to 50 MDX1388	mg/kg	qd	4	cda1+mdx1388	0.938462
https://pubmed.ncbi.nlm.nih.gov/16966409	2006	acute	55	3	n/a	goldensyrian	n/a		75	hamster		clindamycin+challenge	cumulativemortality	f	p	87	vpi10463	140	cfu	spores							control	0.0545455
https://pubmed.ncbi.nlm.nih.gov/16966409	2006	sustained	17	0	n/a	goldensyrian	n/a		75	hamster		clindamycin+challenge	cumulativemortality	f	p	87	vpi10463	140	cfu	spores			10 to 50	mg/kg	qd	4	mdx1388	0
https://pubmed.ncbi.nlm.nih.gov/16966409	2006	sustained	42	2	n/a	goldensyrian	n/a		75	hamster		clindamycin+challenge	cumulativemortality	f	p	87	vpi10463	140	cfu	spores	50	200	50	mg/kg	qd	4	cda1	0.047619
https://pubmed.ncbi.nlm.nih.gov/16966409	2006	sustained	65	36	n/a	goldensyrian	n/a		75	hamster		clindamycin+challenge	cumulativemortality	f	p	87	vpi10463	140	cfu	spores			50 CDA1 + 10 to 50 MDX1388	mg/kg	qd	4	cda1+mdx1388	0.553846
https://pubmed.ncbi.nlm.nih.gov/16966409	2006	sustained	55	0	n/a	goldensyrian	n/a		75	hamster		clindamycin+challenge	cumulativemortality	f	p	87	vpi10463	140	cfu	spores							control	0
https://pubmed.ncbi.nlm.nih.gov/27527088	2016	acute	10	10	spf	goldensyrian	n/a			hamster		clindamycin+challenge	cumulativemortality	f	t	12	630	680	cfu	spores	20	100	10	mg/kg	bid	5	vancomycin	1
https://pubmed.ncbi.nlm.nih.gov/27527088	2016	acute	10	5	spf	goldensyrian	n/a			hamster		clindamycin+challenge	cumulativemortality	f	p	12	630	680	cfu	spores	50	200	50	mg/kg	qd	4	actoxumab-bezlotoxumab	0.5
https://pubmed.ncbi.nlm.nih.gov/27527088	2016	acute	10	0	spf	goldensyrian	n/a			hamster		clindamycin+challenge	cumulativemortality	f	t	12	630	680	cfu	spores							vehiclecontrol	0
https://pubmed.ncbi.nlm.nih.gov/27527088	2016	sustained	10	0	spf	goldensyrian	n/a			hamster		clindamycin+challenge	cumulativemortality	f	t	12	630	680	cfu	spores	20	100	10	mg/kg	bid	5	vancomycin	0
https://pubmed.ncbi.nlm.nih.gov/27527088	2016	sustained	10	4	spf	goldensyrian	n/a			hamster		clindamycin+challenge	cumulativemortality	f	p	12	630	680	cfu	spores	50	200	50	mg/kg	qd	4	actoxumab-bezlotoxumab	0.4
https://pubmed.ncbi.nlm.nih.gov/27527088	2016	sustained	10	0	spf	goldensyrian	n/a			hamster		clindamycin+challenge	cumulativemortality	f	t	12	630	680	cfu	spores							vehiclecontrol	0
https://pubmed.ncbi.nlm.nih.gov/16966409	2006	acute	15	4	n/a	goldensyrian	n/a		75	hamster		clindamycin+challenge+vancomycin	cumulativemortality	f	t	87	vpi10463	140000	cfu	spores	20	80	20	mg/kg	qd	4	mdx1388	0.266667
https://pubmed.ncbi.nlm.nih.gov/16966409	2006	acute	22	15	n/a	goldensyrian	n/a		75	hamster		clindamycin+challenge+vancomycin	cumulativemortality	f	t	87	vpi10463	140000	cfu	spores	80	320	60 CDA1 + 20 MDX1388	mg/kg	qd	4	cda1+mdx1388	0.681818
https://pubmed.ncbi.nlm.nih.gov/16966409	2006	acute	86	48	n/a	goldensyrian	n/a		75	hamster		clindamycin+challenge+vancomycin	cumulativemortality	f	t	87	vpi10463	140000	cfu	spores	60	240	60	mg/kg	qd	4	cda1	0.55814
https://pubmed.ncbi.nlm.nih.gov/16966409	2006	acute	82	31	n/a	goldensyrian	n/a		75	hamster		clindamycin+challenge+vancomycin	cumulativemortality	f	t	87	vpi10463	140000	cfu	spores							control	0.378049
https://pubmed.ncbi.nlm.nih.gov/16966409	2006	sustained	15	4	n/a	goldensyrian	n/a		75	hamster		clindamycin+challenge+vancomycin	cumulativemortality	f	t	87	vpi10463	140000	cfu	spores	20	80	20	mg/kg	qd	4	mdx1388	0.266667
https://pubmed.ncbi.nlm.nih.gov/16966409	2006	sustained	22	15	n/a	goldensyrian	n/a		75	hamster		clindamycin+challenge+vancomycin	cumulativemortality	f	t	87	vpi10463	140000	cfu	spores	80	320	60 CDA1 + 20 MDX1388	mg/kg	qd	4	cda1+mdx1388	0.681818
https://pubmed.ncbi.nlm.nih.gov/16966409	2006	sustained	86	28	n/a	goldensyrian	n/a		75	hamster		clindamycin+challenge+vancomycin	cumulativemortality	f	t	87	vpi10463	140000	cfu	spores	60	240	60	mg/kg	qd	4	cda1	0.325581
https://pubmed.ncbi.nlm.nih.gov/16966409	2006	sustained	82	18	n/a	goldensyrian	n/a		75	hamster		clindamycin+challenge+vancomycin	cumulativemortality	f	t	87	vpi10463	140000	cfu	spores							control	0.219512
https://pubmed.ncbi.nlm.nih.gov/25652749	2015	acute	10	10	spf	goldensyrian	n/a			hamster		clindamycin+challenge	cumulativemortality	t	t	12	630	225		spores	2	10	1	mg/kg	bid	5	fidaxomicin	1
https://pubmed.ncbi.nlm.nih.gov/25652749	2015	sustained	10	3	spf	goldensyrian	n/a			hamster		clindamycin+challenge	cumulativemortality	t	t	12	630	225		spores	2	10	1	mg/kg	bid	5	fidaxomicin	0.3
https://pubmed.ncbi.nlm.nih.gov/25652749	2015	acute	10	10	spf	goldensyrian	n/a			hamster		clindamycin+challenge	cumulativemortality	t	t	12	630	225		spores	20	100	10	mg/kg	bid	5	fidaxomicin	1
https://pubmed.ncbi.nlm.nih.gov/25652749	2015	sustained	10	0	spf	goldensyrian	n/a			hamster		clindamycin+challenge	cumulativemortality	t	t	12	630	225		spores	20	100	10	mg/kg	bid	5	fidaxomicin	0
https://pubmed.ncbi.nlm.nih.gov/25652749	2015	acute	10	10	spf	goldensyrian	n/a			hamster		clindamycin+challenge	cumulativemortality	t	t	12	630	225		spores	20	100	10	mg/kg	bid	5	vancomycin	1
https://pubmed.ncbi.nlm.nih.gov/25652749	2015	sustained	10	0	spf	goldensyrian	n/a			hamster		clindamycin+challenge	cumulativemortality	t	t	12	630	225		spores	20	100	10	mg/kg	bid	5	vancomycin	0
https://pubmed.ncbi.nlm.nih.gov/25652749	2015	acute	10	10	spf	goldensyrian	n/a			hamster		clindamycin+challenge	cumulativemortality	t	t	12	630	225		spores	25	125	12.5	mg/kg	bid	5	smt19969	1
https://pubmed.ncbi.nlm.nih.gov/25652749	2015	sustained	10	10	spf	goldensyrian	n/a			hamster		clindamycin+challenge	cumulativemortality	t	t	12	630	225		spores	25	125	12.5	mg/kg	bid	5	smt19969	1
https://pubmed.ncbi.nlm.nih.gov/25652749	2015	acute	10	10	spf	goldensyrian	n/a			hamster		clindamycin+challenge	cumulativemortality	t	t	12	630	225		spores	5	25	2.5	mg/kg	bid	5	fidaxomicin	1
https://pubmed.ncbi.nlm.nih.gov/25652749	2015	sustained	10	4	spf	goldensyrian	n/a			hamster		clindamycin+challenge	cumulativemortality	t	t	12	630	225		spores	5	25	2.5	mg/kg	bid	5	fidaxomicin	0.4
https://pubmed.ncbi.nlm.nih.gov/25652749	2015	acute	10	10	spf	goldensyrian	n/a			hamster		clindamycin+challenge	cumulativemortality	t	t	12	630	225		spores	50	250	25	mg/kg	bid	5	fidaxomicin	1
https://pubmed.ncbi.nlm.nih.gov/25652749	2015	sustained	10	0	spf	goldensyrian	n/a			hamster		clindamycin+challenge	cumulativemortality	t	t	12	630	225		spores	50	250	25	mg/kg	bid	5	fidaxomicin	0
https://pubmed.ncbi.nlm.nih.gov/25652749	2015	acute	10	10	spf	goldensyrian	n/a			hamster		clindamycin+challenge	cumulativemortality	t	t	12	630	225		spores	50	250	25	mg/kg	bid	5	smt19969	1
https://pubmed.ncbi.nlm.nih.gov/25652749	2015	sustained	10	8	spf	goldensyrian	n/a			hamster		clindamycin+challenge	cumulativemortality	t	t	12	630	225		spores	50	250	25	mg/kg	bid	5	smt19969	0.8
https://pubmed.ncbi.nlm.nih.gov/25652749	2015	acute	10	0	spf	goldensyrian	n/a			hamster		clindamycin+challenge	cumulativemortality	t	t	12	630	225		spores							vehiclecontrol	0
https://pubmed.ncbi.nlm.nih.gov/25652749	2015	sustained	10	0	spf	goldensyrian	n/a			hamster		clindamycin+challenge	cumulativemortality	t	t	12	630	225		spores							vehiclecontrol	0
https://pubmed.ncbi.nlm.nih.gov/25652749	2015	acute	10	10	spf	goldensyrian	n/a			hamster		clindamycin+challenge	cumulativemortality	t	t	27	bi1	225		spores	2	10	1	mg/kg	bid	5	fidaxomicin	1
https://pubmed.ncbi.nlm.nih.gov/25652749	2015	sustained	10	9	spf	goldensyrian	n/a			hamster		clindamycin+challenge	cumulativemortality	t	t	27	bi1	225		spores	2	10	1	mg/kg	bid	5	fidaxomicin	0.9
https://pubmed.ncbi.nlm.nih.gov/25652749	2015	acute	10	10	spf	goldensyrian	n/a			hamster		clindamycin+challenge	cumulativemortality	t	t	27	bi1	225		spores	20	100	10	mg/kg	bid	5	vancomycin	1
https://pubmed.ncbi.nlm.nih.gov/25652749	2015	sustained	10	1	spf	goldensyrian	n/a			hamster		clindamycin+challenge	cumulativemortality	t	t	27	bi1	225		spores	20	100	10	mg/kg	bid	5	vancomycin	0.1
https://pubmed.ncbi.nlm.nih.gov/25652749	2015	acute	10	10	spf	goldensyrian	n/a			hamster		clindamycin+challenge	cumulativemortality	t	t	27	bi1	225		spores	25	125	12.5	mg/kg	bid	5	smt19969	1
https://pubmed.ncbi.nlm.nih.gov/25652749	2015	sustained	10	9	spf	goldensyrian	n/a			hamster		clindamycin+challenge	cumulativemortality	t	t	27	bi1	225		spores	25	125	12.5	mg/kg	bid	5	smt19969	0.9
https://pubmed.ncbi.nlm.nih.gov/25652749	2015	acute	10	10	spf	goldensyrian	n/a			hamster		clindamycin+challenge	cumulativemortality	t	t	27	bi1	225		spores	5	25	2.5	mg/kg	bid	5	fidaxomicin	1
https://pubmed.ncbi.nlm.nih.gov/25652749	2015	sustained	10	9	spf	goldensyrian	n/a			hamster		clindamycin+challenge	cumulativemortality	t	t	27	bi1	225		spores	5	25	2.5	mg/kg	bid	5	fidaxomicin	0.9
https://pubmed.ncbi.nlm.nih.gov/25652749	2015	acute	10	10	spf	goldensyrian	n/a			hamster		clindamycin+challenge	cumulativemortality	t	t	27	bi1	225		spores	50	250	25	mg/kg	bid	5	smt19969	1
https://pubmed.ncbi.nlm.nih.gov/25652749	2015	sustained	10	10	spf	goldensyrian	n/a			hamster		clindamycin+challenge	cumulativemortality	t	t	27	bi1	225		spores	50	250	25	mg/kg	bid	5	smt19969	1
https://pubmed.ncbi.nlm.nih.gov/25652749	2015	acute	10	0	spf	goldensyrian	n/a			hamster		clindamycin+challenge	cumulativemortality	t	t	27	bi1	225		spores							vehiclecontrol	0
https://pubmed.ncbi.nlm.nih.gov/25652749	2015	sustained	10	0	spf	goldensyrian	n/a			hamster		clindamycin+challenge	cumulativemortality	t	t	27	bi1	225		spores							vehiclecontrol	0
https://pubmed.ncbi.nlm.nih.gov/22203600	2012	acute	11	1	n/a	goldensyrian	f		85	hamster	selectivelyinhibitsthereplication-specificdnapolymeraseofclostridiumdifficile	clindamycin+challenge	cumulativemortality	t	t	87	vpi10463	5000000	cfu	spores							control	0.0909091
https://pubmed.ncbi.nlm.nih.gov/22203600	2012	sustained	11	0	n/a	goldensyrian	f		85	hamster	selectivelyinhibitsthereplication-specificdnapolymeraseofclostridiumdifficile	clindamycin+challenge	cumulativemortality	t	t	87	vpi10463	5000000	cfu	spores							control	0
https://pubmed.ncbi.nlm.nih.gov/22203600	2012	acute	6	6	n/a	goldensyrian	f		85	hamster	selectivelyinhibitsthereplication-specificdnapolymeraseofclostridiumdifficile	clindamycin+challenge	cumulativemortality	t	t	87	vpi10463	5000000	cfu	spores	100	300	50	mg/kg	bid	3	vancomycin	1
https://pubmed.ncbi.nlm.nih.gov/22203600	2012	sustained	6	1	n/a	goldensyrian	f		85	hamster	selectivelyinhibitsthereplication-specificdnapolymeraseofclostridiumdifficile	clindamycin+challenge	cumulativemortality	t	t	87	vpi10463	5000000	cfu	spores	100	300	50	mg/kg	bid	3	vancomycin	0.166667
https://pubmed.ncbi.nlm.nih.gov/22203600	2012	acute	6	6	n/a	goldensyrian	f		85	hamster	selectivelyinhibitsthereplication-specificdnapolymeraseofclostridiumdifficile	clindamycin+challenge	cumulativemortality	t	t	87	vpi10463	5000000	cfu	spores	100	300	50	mg/kg	bid	3	more-dcbg(362e)	1
https://pubmed.ncbi.nlm.nih.gov/22203600	2012	sustained	6	1	n/a	goldensyrian	f		85	hamster	selectivelyinhibitsthereplication-specificdnapolymeraseofclostridiumdifficile	clindamycin+challenge	cumulativemortality	t	t	87	vpi10463	5000000	cfu	spores	100	300	50	mg/kg	bid	3	more-dcbg(362e)	0.166667
https://pubmed.ncbi.nlm.nih.gov/22203600	2012	sustained	5	3	n/a	goldensyrian	f		85	hamster	selectivelyinhibitsthereplication-specificdnapolymeraseofclostridiumdifficile	clindamycin+challenge	cumulativemortality	t	t	87	vpi10463	5000000	cfu	spores	100	700	50	mg/kg	bid	7	more-dcbg(362e)	0.6
https://pubmed.ncbi.nlm.nih.gov/22203600	2012	acute	5	5	n/a	goldensyrian	f		85	hamster	selectivelyinhibitsthereplication-specificdnapolymeraseofclostridiumdifficile	clindamycin+challenge	cumulativemortality	t	t	87	vpi10463	5000000	cfu	spores	100	700	50	mg/kg	bid	7	more-dcbg(362e)	1
https://pubmed.ncbi.nlm.nih.gov/22203600	2012	sustained	5	5	n/a	goldensyrian	f		85	hamster	selectivelyinhibitsthereplication-specificdnapolymeraseofclostridiumdifficile	clindamycin+challenge	cumulativemortality	t	t	87	vpi10463	5000000	cfu	spores	100	1400	50	mg/kg	bid	14	more-dcbg(362e)	1
https://pubmed.ncbi.nlm.nih.gov/22203600	2012	acute	5	5	n/a	goldensyrian	f		85	hamster	selectivelyinhibitsthereplication-specificdnapolymeraseofclostridiumdifficile	clindamycin+challenge	cumulativemortality	t	t	87	vpi10463	5000000	cfu	spores	100	1400	50	mg/kg	bid	14	more-dcbg(362e)	1
https://pubmed.ncbi.nlm.nih.gov/30736358	2019	acute	10	10	n/a	goldensyrian	m		100	hamster		clindamycin+challenge	cumulativemortality	t	t	12	630	100		spores	30	93.75	10	ml/kg	tid	3.125	anti-cd-wpiinducesatcdaneutralizationcapacityof100	1
https://pubmed.ncbi.nlm.nih.gov/30736358	2019	acute	10	10	n/a	goldensyrian	m		100	hamster		clindamycin+challenge	cumulativemortality	t	t	12	630	100		spores	30	93.75	10	ml/kg	tid	3.125	anti-cd-wpiinducesatcdaneutralizationcapacityof1000	1
https://pubmed.ncbi.nlm.nih.gov/30736358	2019	acute	10	10	n/a	goldensyrian	m		100	hamster		clindamycin+challenge	cumulativemortality	t	t	12	630	100		spores	30	93.75	10	ml/kg	tid	3.125	anti-cd-wpiinducesatcdaneutralizationcapacityof10000	1
https://pubmed.ncbi.nlm.nih.gov/30736358	2019	acute	10	10	n/a	goldensyrian	m		100	hamster		clindamycin+challenge	cumulativemortality	t	t	12	630	100		spores	20	60	20	mg/kg	qd	3	vancomycin	1
https://pubmed.ncbi.nlm.nih.gov/30736358	2019	sustained	10	8	n/a	goldensyrian	m		100	hamster		clindamycin+challenge	cumulativemortality	t	t	12	630	100		spores	30	93.75	10	ml/kg	tid	3.125	anti-cd-wpiinducesatcdaneutralizationcapacityof100	0.8
https://pubmed.ncbi.nlm.nih.gov/30736358	2019	sustained	10	5	n/a	goldensyrian	m		100	hamster		clindamycin+challenge	cumulativemortality	t	t	12	630	100		spores	30	93.75	10	ml/kg	tid	3.125	anti-cd-wpiinducesatcdaneutralizationcapacityof1000	0.5
https://pubmed.ncbi.nlm.nih.gov/30736358	2019	sustained	10	10	n/a	goldensyrian	m		100	hamster		clindamycin+challenge	cumulativemortality	t	t	12	630	100		spores	30	93.75	10	ml/kg	tid	3.125	anti-cd-wpiinducesatcdaneutralizationcapacityof10000	1
https://pubmed.ncbi.nlm.nih.gov/30736358	2019	sustained	10	1	n/a	goldensyrian	m		100	hamster		clindamycin+challenge	cumulativemortality	t	t	12	630	100		spores	20	60	20	mg/kg	qd	3	vancomycin	0.1
https://pubmed.ncbi.nlm.nih.gov/7309245	1981	acute	30	24	n/a	goldensyrian	m		85	hamster		vancomyin+challenge	survivors	f	p		49a	100000	cfu								cecalhomogenates	0.8
https://pubmed.ncbi.nlm.nih.gov/7309245	1981	acute	20	1	n/a	goldensyrian	m		85	hamster		vancomyin+challenge	survivors	f	p		49a	100000	cfu								negativecontrol	0.05
https://pubmed.ncbi.nlm.nih.gov/10952564	2000	acute	10	10	n/a	goldensyrian	m		90	hamster		clindamycin+challenge	cumulativemortality	f	t		ttu614	100000			150	900	150	mg/kg	qd	6	metronidazole	1
https://pubmed.ncbi.nlm.nih.gov/10952564	2000	acute	10	10	n/a	goldensyrian	m		90	hamster		clindamycin+challenge	cumulativemortality	f	t		ttu614	100000			150	900	150	mg/kg	qd	6	nitazoxanide	1
https://pubmed.ncbi.nlm.nih.gov/10952564	2000	acute	10	5	n/a	goldensyrian	m		90	hamster		clindamycin+challenge	cumulativemortality	f	t		ttu614	100000			30	180	30	mg/kg	qd	6	nitazoxanide	0.5
https://pubmed.ncbi.nlm.nih.gov/10952564	2000	acute	10	10	n/a	goldensyrian	m		90	hamster		clindamycin+challenge	cumulativemortality	f	t		ttu614	100000			50	300	50	mg/kg	qd	6	vancomycin	1
https://pubmed.ncbi.nlm.nih.gov/10952564	2000	acute	10	10	n/a	goldensyrian	m		90	hamster		clindamycin+challenge	cumulativemortality	f	t		ttu614	100000			75	450	75	mg/kg	qd	6	nitazoxanide	1
https://pubmed.ncbi.nlm.nih.gov/10952564	2000	acute	10	0	n/a	goldensyrian	m		90	hamster		clindamycin+challenge	cumulativemortality	f	t		ttu614	100000									salinecontrol	0
https://pubmed.ncbi.nlm.nih.gov/10952564	2000	sustained	10	0	n/a	goldensyrian	m		90	hamster		clindamycin+challenge	cumulativemortality	f	t		ttu614	100000			150	900	150	mg/kg	qd	6	metronidazole	0
https://pubmed.ncbi.nlm.nih.gov/10952564	2000	sustained	10	0	n/a	goldensyrian	m		90	hamster		clindamycin+challenge	cumulativemortality	f	t		ttu614	100000			150	900	150	mg/kg	qd	6	nitazoxanide	0
https://pubmed.ncbi.nlm.nih.gov/10952564	2000	sustained	10	0	n/a	goldensyrian	m		90	hamster		clindamycin+challenge	cumulativemortality	f	t		ttu614	100000			30	180	30	mg/kg	qd	6	nitazoxanide	0
https://pubmed.ncbi.nlm.nih.gov/10952564	2000	sustained	10	3	n/a	goldensyrian	m		90	hamster		clindamycin+challenge	cumulativemortality	f	t		ttu614	100000			50	300	50	mg/kg	qd	6	vancomycin	0.3
https://pubmed.ncbi.nlm.nih.gov/10952564	2000	sustained	10	0	n/a	goldensyrian	m		90	hamster		clindamycin+challenge	cumulativemortality	f	t		ttu614	100000			75	450	75	mg/kg	qd	6	nitazoxanide	0
https://pubmed.ncbi.nlm.nih.gov/10952564	2000	sustained	10	0	n/a	goldensyrian	m		90	hamster		clindamycin+challenge	cumulativemortality	f	t		ttu614	100000									salinecontrol	0
https://pubmed.ncbi.nlm.nih.gov/15388461	2004	acute	10	10	n/a	goldensyrian	n/a		113	hamster		clindamycin+challenge	cumulativemortality	t	t	87	vpi10463	100000	cfu		20	100	20	mg/kg	qd	5	rifalazil	1
https://pubmed.ncbi.nlm.nih.gov/15388461	2004	acute	14	14	n/a	goldensyrian	n/a		113	hamster		clindamycin+challenge	cumulativemortality	t	t	87	vpi10463	100000	cfu		50	250	50	mg/kg	qd	5	vancomycin	1
https://pubmed.ncbi.nlm.nih.gov/15388461	2004	acute	10	0	n/a	goldensyrian	n/a		113	hamster		clindamycin+challenge	cumulativemortality	t	t	87	vpi10463	100000	cfu								vehiclecontrol	0
https://pubmed.ncbi.nlm.nih.gov/15388461	2004	sustained	10	10	n/a	goldensyrian	n/a		113	hamster		clindamycin+challenge	cumulativemortality	t	t	87	vpi10463	100000	cfu		20	100	20	mg/kg	qd	5	rifalazil	1
https://pubmed.ncbi.nlm.nih.gov/15388461	2004	sustained	14	5	n/a	goldensyrian	n/a		113	hamster		clindamycin+challenge	cumulativemortality	t	t	87	vpi10463	100000	cfu		50	250	50	mg/kg	qd	5	vancomycin	0.357143
https://pubmed.ncbi.nlm.nih.gov/15388461	2004	sustained	10	0	n/a	goldensyrian	n/a		113	hamster		clindamycin+challenge	cumulativemortality	t	t	87	vpi10463	100000	cfu								vehiclecontrol	0
https://pubmed.ncbi.nlm.nih.gov/18195066	2008	acute	10	8	n/a	goldensyrian	n/a			hamster		clindamycin+challenge	cumulativemortality	t	p	87	vpi10463	100000	cfu		100	500	100	mg/kg	qd	5	rifaximin	0.8
https://pubmed.ncbi.nlm.nih.gov/18195066	2008	acute	20	18	n/a	goldensyrian	n/a			hamster		clindamycin+challenge	cumulativemortality	t	t	87	vpi10463	100000	cfu		100	500	100	mg/kg	qd	5	rifaximin	0.9
https://pubmed.ncbi.nlm.nih.gov/18195066	2008	acute	10	6	n/a	goldensyrian	n/a			hamster		clindamycin+challenge	cumulativemortality	t	p	87	vpi10463	100000	cfu		25	125	25	mg/kg	qd	5	rifaximin	0.6
https://pubmed.ncbi.nlm.nih.gov/18195066	2008	acute	20	9	n/a	goldensyrian	n/a			hamster		clindamycin+challenge	cumulativemortality	t	t	87	vpi10463	100000	cfu		25	125	25	mg/kg	qd	5	rifaximin	0.45
https://pubmed.ncbi.nlm.nih.gov/18195066	2008	acute	10	7	n/a	goldensyrian	n/a			hamster		clindamycin+challenge	cumulativemortality	t	p	87	vpi10463	100000	cfu		50	250	50	mg/kg	qd	5	rifaximin	0.7
https://pubmed.ncbi.nlm.nih.gov/18195066	2008	acute	20	13	n/a	goldensyrian	n/a			hamster		clindamycin+challenge	cumulativemortality	t	t	87	vpi10463	100000	cfu		50	250	50	mg/kg	qd	5	rifaximin	0.65
https://pubmed.ncbi.nlm.nih.gov/18195066	2008	acute	10	7	n/a	goldensyrian	n/a			hamster		clindamycin+challenge	cumulativemortality	t	p	87	vpi10463	100000	cfu		50	250	50	mg/kg	qd	5	vancomycin	0.7
https://pubmed.ncbi.nlm.nih.gov/18195066	2008	acute	20	18	n/a	goldensyrian	n/a			hamster		clindamycin+challenge	cumulativemortality	t	t	87	vpi10463	100000	cfu		50	250	50	mg/kg	qd	5	vancomycin	0.9
https://pubmed.ncbi.nlm.nih.gov/18195066	2008	acute	10	0	n/a	goldensyrian	n/a			hamster		clindamycin+challenge	cumulativemortality	t	p	87	vpi10463	100000	cfu								vehiclecontrol	0
https://pubmed.ncbi.nlm.nih.gov/18195066	2008	acute	20	0	n/a	goldensyrian	n/a			hamster		clindamycin+challenge	cumulativemortality	t	t	87	vpi10463	100000	cfu								vehiclecontrol	0
https://pubmed.ncbi.nlm.nih.gov/18195066	2008	sustained	8	8	n/a	goldensyrian	n/a			hamster		clindamycin+challenge	cumulativemortality	t	t	87	vpi10463	100000	cfu		100	500	100	mg/kg	qd	5	rifaximin	1
https://pubmed.ncbi.nlm.nih.gov/18195066	2008	sustained	1	1	n/a	goldensyrian	n/a			hamster		clindamycin+challenge	cumulativemortality	t	t	87	vpi10463	100000	cfu		25	125	25	mg/kg	qd	5	rifaximin	1
https://pubmed.ncbi.nlm.nih.gov/18195066	2008	sustained	3	3	n/a	goldensyrian	n/a			hamster		clindamycin+challenge	cumulativemortality	t	t	87	vpi10463	100000	cfu		50	250	50	mg/kg	qd	5	rifaximin	1
https://pubmed.ncbi.nlm.nih.gov/18195066	2008	sustained	8	2	n/a	goldensyrian	n/a			hamster		clindamycin+challenge	cumulativemortality	t	t	87	vpi10463	100000	cfu		50	250	50	mg/kg	qd	5	vancomycin	0.25
https://pubmed.ncbi.nlm.nih.gov/18195066	2008	sustained	10	0	n/a	goldensyrian	n/a			hamster		clindamycin+challenge	cumulativemortality	t	t	87	vpi10463	100000	cfu								vehiclecontrol	0
https://pubmed.ncbi.nlm.nih.gov/1929250	1991	acute	8	8	n/a	goldensyrian	m		90	hamster		clindamycin+challenge	cumulativemortality	t	t	1	atcc9689	1000000			0.2	1	0.2	mg/kg	qd	5	tiacumicinsb	1
https://pubmed.ncbi.nlm.nih.gov/1929250	1991	acute	8	8	n/a	goldensyrian	m		90	hamster		clindamycin+challenge	cumulativemortality	t	t	1	atcc9689	1000000			0.2	1	0.2	mg/kg	qd	5	tiacumicinsc	1
https://pubmed.ncbi.nlm.nih.gov/1929250	1991	acute	8	8	n/a	goldensyrian	m		90	hamster		clindamycin+challenge	cumulativemortality	t	t	1	atcc9689	1000000			0.2	1	0.2	mg/kg	qd	5	vancomycin	1
https://pubmed.ncbi.nlm.nih.gov/1929250	1991	acute	5	3	n/a	goldensyrian	m		90	hamster		clindamycin+challenge	cumulativemortality	t	t		2926	1000000			1	5	1	mg/kg	qd	5	tiacumicinsb	0.6
https://pubmed.ncbi.nlm.nih.gov/1929250	1991	acute	8	8	n/a	goldensyrian	m		90	hamster		clindamycin+challenge	cumulativemortality	t	t	1	atcc9689	1000000			1	5	1	mg/kg	qd	5	tiacumicinsb	1
https://pubmed.ncbi.nlm.nih.gov/1929250	1991	acute	8	8	n/a	goldensyrian	m		90	hamster		clindamycin+challenge	cumulativemortality	t	t	1	atcc9689	1000000			1	5	1	mg/kg	qd	5	tiacumicinsc	1
https://pubmed.ncbi.nlm.nih.gov/1929250	1991	acute	5	3	n/a	goldensyrian	m		90	hamster		clindamycin+challenge	cumulativemortality	t	t		2926	1000000			1	5	1	mg/kg	qd	5	vancomycin	0.6
https://pubmed.ncbi.nlm.nih.gov/1929250	1991	acute	8	8	n/a	goldensyrian	m		90	hamster		clindamycin+challenge	cumulativemortality	t	t	1	atcc9689	1000000			1	5	1	mg/kg	qd	5	vancomycin	1
https://pubmed.ncbi.nlm.nih.gov/1929250	1991	acute	5	5	n/a	goldensyrian	m		90	hamster		clindamycin+challenge	cumulativemortality	t	t		2926	1000000			5	25	5	mg/kg	qd	5	tiacumicinsb	1
https://pubmed.ncbi.nlm.nih.gov/1929250	1991	acute	8	8	n/a	goldensyrian	m		90	hamster		clindamycin+challenge	cumulativemortality	t	t	1	atcc9689	1000000			5	25	5	mg/kg	qd	5	tiacumicinsb	1
https://pubmed.ncbi.nlm.nih.gov/1929250	1991	acute	8	8	n/a	goldensyrian	m		90	hamster		clindamycin+challenge	cumulativemortality	t	t	1	atcc9689	1000000			5	25	5	mg/kg	qd	5	tiacumicinsc	1
https://pubmed.ncbi.nlm.nih.gov/1929250	1991	acute	5	5	n/a	goldensyrian	m		90	hamster		clindamycin+challenge	cumulativemortality	t	t		2926	1000000			5	25	5	mg/kg	qd	5	vancomycin	1
https://pubmed.ncbi.nlm.nih.gov/1929250	1991	acute	8	8	n/a	goldensyrian	m		90	hamster		clindamycin+challenge	cumulativemortality	t	t	1	atcc9689	1000000			5	25	5	mg/kg	qd	5	vancomycin	1
https://pubmed.ncbi.nlm.nih.gov/1929250	1991	acute	5	3	n/a	goldensyrian	m		90	hamster		clindamycin+challenge	cumulativemortality	t	t		2926	1000000									control	0.6
https://pubmed.ncbi.nlm.nih.gov/1929250	1991	acute	8	6	n/a	goldensyrian	m		90	hamster		clindamycin+challenge	cumulativemortality	t	t	1	atcc9689	1000000									control	0.75
https://pubmed.ncbi.nlm.nih.gov/1929250	1991	sustained	8	8	n/a	goldensyrian	m		90	hamster		clindamycin+challenge	cumulativemortality	t	t	1	atcc9689	1000000			0.2	1	0.2	mg/kg	qd	5	tiacumicinsb	1
https://pubmed.ncbi.nlm.nih.gov/1929250	1991	sustained	8	8	n/a	goldensyrian	m		90	hamster		clindamycin+challenge	cumulativemortality	t	t	1	atcc9689	1000000			0.2	1	0.2	mg/kg	qd	5	tiacumicinsc	1
https://pubmed.ncbi.nlm.nih.gov/1929250	1991	sustained	8	0	n/a	goldensyrian	m		90	hamster		clindamycin+challenge	cumulativemortality	t	t	1	atcc9689	1000000			0.2	1	0.2	mg/kg	qd	5	vancomycin	0
https://pubmed.ncbi.nlm.nih.gov/1929250	1991	sustained	5	3	n/a	goldensyrian	m		90	hamster		clindamycin+challenge	cumulativemortality	t	t		2926	1000000			1	5	1	mg/kg	qd	5	tiacumicinsb	0.6
https://pubmed.ncbi.nlm.nih.gov/1929250	1991	sustained	8	8	n/a	goldensyrian	m		90	hamster		clindamycin+challenge	cumulativemortality	t	t	1	atcc9689	1000000			1	5	1	mg/kg	qd	5	tiacumicinsb	1
https://pubmed.ncbi.nlm.nih.gov/1929250	1991	sustained	8	8	n/a	goldensyrian	m		90	hamster		clindamycin+challenge	cumulativemortality	t	t	1	atcc9689	1000000			1	5	1	mg/kg	qd	5	tiacumicinsc	1
https://pubmed.ncbi.nlm.nih.gov/1929250	1991	sustained	5	0	n/a	goldensyrian	m		90	hamster		clindamycin+challenge	cumulativemortality	t	t		2926	1000000			1	5	1	mg/kg	qd	5	vancomycin	0
https://pubmed.ncbi.nlm.nih.gov/1929250	1991	sustained	8	1	n/a	goldensyrian	m		90	hamster		clindamycin+challenge	cumulativemortality	t	t	1	atcc9689	1000000			1	5	1	mg/kg	qd	5	vancomycin	0.125
https://pubmed.ncbi.nlm.nih.gov/1929250	1991	sustained	5	5	n/a	goldensyrian	m		90	hamster		clindamycin+challenge	cumulativemortality	t	t		2926	1000000			5	25	5	mg/kg	qd	5	tiacumicinsb	1
https://pubmed.ncbi.nlm.nih.gov/1929250	1991	sustained	8	8	n/a	goldensyrian	m		90	hamster		clindamycin+challenge	cumulativemortality	t	t	1	atcc9689	1000000			5	25	5	mg/kg	qd	5	tiacumicinsb	1
https://pubmed.ncbi.nlm.nih.gov/1929250	1991	sustained	8	8	n/a	goldensyrian	m		90	hamster		clindamycin+challenge	cumulativemortality	t	t	1	atcc9689	1000000			5	25	5	mg/kg	qd	5	tiacumicinsc	1
https://pubmed.ncbi.nlm.nih.gov/1929250	1991	sustained	5	5	n/a	goldensyrian	m		90	hamster		clindamycin+challenge	cumulativemortality	t	t		2926	1000000			5	25	5	mg/kg	qd	5	vancomycin	1
https://pubmed.ncbi.nlm.nih.gov/1929250	1991	sustained	8	3	n/a	goldensyrian	m		90	hamster		clindamycin+challenge	cumulativemortality	t	t	1	atcc9689	1000000			5	25	5	mg/kg	qd	5	vancomycin	0.375
https://pubmed.ncbi.nlm.nih.gov/1929250	1991	sustained	5	0	n/a	goldensyrian	m		90	hamster		clindamycin+challenge	cumulativemortality	t	t		2926	1000000									control	0
https://pubmed.ncbi.nlm.nih.gov/1929250	1991	sustained	8	2	n/a	goldensyrian	m		90	hamster		clindamycin+challenge	cumulativemortality	t	t	1	atcc9689	1000000									control	0.25
https://pubmed.ncbi.nlm.nih.gov/11451694	2001	acute	10	10	n/a	n/a	n/a			hamster		challenge+clindamycin	cumulativemortality	t	p		huc2-4	1000000	cfu		1000	7000	1000	mg/kg	qd	7	gt160-246	1
https://pubmed.ncbi.nlm.nih.gov/11451694	2001	acute	10	7	n/a	n/a	n/a			hamster		challenge+clindamycin	cumulativemortality	t	t		huc2-4	1000000	cfu		1000	7000	1000	mg/kg	qd	7	gt160-246	0.7
https://pubmed.ncbi.nlm.nih.gov/11451694	2001	acute	10	7	n/a	n/a	n/a			hamster		challenge+clindamycin	cumulativemortality	t	t		huc2-4	1000000	cfu		1500	10500	1500	mg/kg	qd	7	gt160-246	0.7
https://pubmed.ncbi.nlm.nih.gov/11451694	2001	acute	10	10	n/a	n/a	n/a			hamster		challenge+clindamycin	cumulativemortality	t	t		huc2-4	1000000	cfu		210	1050	210	mg/kg	qd	5	metronidazole	1
https://pubmed.ncbi.nlm.nih.gov/11451694	2001	acute	10	8	n/a	n/a	n/a			hamster		challenge+clindamycin	cumulativemortality	t	p		huc2-4	1000000	cfu		500	3500	500	mg/kg	qd	7	gt160-246	0.8
https://pubmed.ncbi.nlm.nih.gov/11451694	2001	acute	10	9	n/a	n/a	n/a			hamster		challenge+clindamycin	cumulativemortality	t	t		huc2-4	1000000	cfu		500	3500	500	mg/kg	qd	7	gt160-246	0.9
https://pubmed.ncbi.nlm.nih.gov/11451694	2001	acute	10	0	n/a	n/a	n/a			hamster		challenge+clindamycin	cumulativemortality	t	p		huc2-4	1000000	cfu								salinecontrol	0
https://pubmed.ncbi.nlm.nih.gov/11451694	2001	sustained	10	9	n/a	n/a	n/a			hamster		challenge+clindamycin	cumulativemortality	t	p		huc2-4	1000000	cfu		1000	7000	1000	mg/kg	qd	7	gt160-246	0.9
https://pubmed.ncbi.nlm.nih.gov/11451694	2001	sustained	10	7	n/a	n/a	n/a			hamster		challenge+clindamycin	cumulativemortality	t	t		huc2-4	1000000	cfu		1000	7000	1000	mg/kg	qd	7	gt160-246	0.7
https://pubmed.ncbi.nlm.nih.gov/11451694	2001	sustained	10	7	n/a	n/a	n/a			hamster		challenge+clindamycin	cumulativemortality	t	t		huc2-4	1000000	cfu		1500	10500	1500	mg/kg	qd	7	gt160-246	0.7
https://pubmed.ncbi.nlm.nih.gov/11451694	2001	sustained	10	2	n/a	n/a	n/a			hamster		challenge+clindamycin	cumulativemortality	t	t		huc2-4	1000000	cfu		210	1050	210	mg/kg	qd	5	metronidazole	0.2
https://pubmed.ncbi.nlm.nih.gov/11451694	2001	sustained	10	7	n/a	n/a	n/a			hamster		challenge+clindamycin	cumulativemortality	t	p		huc2-4	1000000	cfu		500	3500	500	mg/kg	qd	7	gt160-246	0.7
https://pubmed.ncbi.nlm.nih.gov/11451694	2001	sustained	10	9	n/a	n/a	n/a			hamster		challenge+clindamycin	cumulativemortality	t	t		huc2-4	1000000	cfu		500	3500	500	mg/kg	qd	7	gt160-246	0.9
https://pubmed.ncbi.nlm.nih.gov/11451694	2001	sustained	10	0	n/a	n/a	n/a			hamster		challenge+clindamycin	cumulativemortality	t	p		huc2-4	1000000	cfu								salinecontrol	0
https://pubmed.ncbi.nlm.nih.gov/22203600	2012	acute	6	0	n/a	goldensyrian	f		85	hamster	selectivelyinhibitsthereplication-specificdnapolymeraseofclostridiumdifficile	clindamycin+challenge	cumulativemortality	t	t	87	vpi10463	10000000	cfu	spores							control	0
https://pubmed.ncbi.nlm.nih.gov/22203600	2012	acute	6	6	n/a	goldensyrian	f		85	hamster	selectivelyinhibitsthereplication-specificdnapolymeraseofclostridiumdifficile	clindamycin+challenge	cumulativemortality	t	t	87	vpi10463	10000000	cfu	spores	100	300	50	mg/kg	bid	3	vancomycin	1
https://pubmed.ncbi.nlm.nih.gov/22203600	2012	acute	3	1	n/a	goldensyrian	f		85	hamster	selectivelyinhibitsthereplication-specificdnapolymeraseofclostridiumdifficile	clindamycin+challenge	cumulativemortality	t	t	87	vpi10463	10000000	cfu	spores	12.5	37.5	6.25	mg/kg	bid	3	359e	0.333333
https://pubmed.ncbi.nlm.nih.gov/22203600	2012	acute	6	5	n/a	goldensyrian	f		85	hamster	selectivelyinhibitsthereplication-specificdnapolymeraseofclostridiumdifficile	clindamycin+challenge	cumulativemortality	t	t	87	vpi10463	10000000	cfu	spores	25	75	12.5	mg/kg	bid	3	359e	0.833333
https://pubmed.ncbi.nlm.nih.gov/22203600	2012	acute	6	6	n/a	goldensyrian	f		85	hamster	selectivelyinhibitsthereplication-specificdnapolymeraseofclostridiumdifficile	clindamycin+challenge	cumulativemortality	t	t	87	vpi10463	10000000	cfu	spores	50	150	25	mg/kg	bid	3	359e	1
https://pubmed.ncbi.nlm.nih.gov/22203600	2012	acute	6	6	n/a	goldensyrian	f		85	hamster	selectivelyinhibitsthereplication-specificdnapolymeraseofclostridiumdifficile	clindamycin+challenge	cumulativemortality	t	t	87	vpi10463	10000000	cfu	spores	100	300	50	mg/kg	bid	3	359e	1
https://pubmed.ncbi.nlm.nih.gov/22203600	2012	acute	6	6	n/a	goldensyrian	f		85	hamster	selectivelyinhibitsthereplication-specificdnapolymeraseofclostridiumdifficile	clindamycin+challenge	cumulativemortality	t	t	87	vpi10463	10000000	cfu	spores	12.5	37.5	6.25	mg/kg	bid	3	more-dcbg(362e)	1
https://pubmed.ncbi.nlm.nih.gov/22203600	2012	acute	6	6	n/a	goldensyrian	f		85	hamster	selectivelyinhibitsthereplication-specificdnapolymeraseofclostridiumdifficile	clindamycin+challenge	cumulativemortality	t	t	87	vpi10463	10000000	cfu	spores	25	75	12.5	mg/kg	bid	3	more-dcbg(362e)	1
https://pubmed.ncbi.nlm.nih.gov/22203600	2012	acute	6	6	n/a	goldensyrian	f		85	hamster	selectivelyinhibitsthereplication-specificdnapolymeraseofclostridiumdifficile	clindamycin+challenge	cumulativemortality	t	t	87	vpi10463	10000000	cfu	spores	50	150	25	mg/kg	bid	3	more-dcbg(362e)	1
https://pubmed.ncbi.nlm.nih.gov/22203600	2012	acute	6	6	n/a	goldensyrian	f		85	hamster	selectivelyinhibitsthereplication-specificdnapolymeraseofclostridiumdifficile	clindamycin+challenge	cumulativemortality	t	t	87	vpi10463	10000000	cfu	spores	100	300	50	mg/kg	bid	3	more-dcbg(362e)	1
https://pubmed.ncbi.nlm.nih.gov/29439962	2018	acute	6	2	n/a	goldensyrian	m			hamster		clindamycin+challenge	cumulativemortality	t	t	27	2009155	30000		spores	0.03	0.15	0.03	mg/kg	qd	5	fidaxomicin	0.333333
https://pubmed.ncbi.nlm.nih.gov/29439962	2018	acute	6	3	n/a	goldensyrian	m			hamster		clindamycin+challenge	cumulativemortality	t	t	27	2009155	30000		spores	0.3	1.5	0.3	mg/kg	qd	5	fidaxomicin	0.5
https://pubmed.ncbi.nlm.nih.gov/29439962	2018	acute	6	6	n/a	goldensyrian	m			hamster		clindamycin+challenge	cumulativemortality	t	t	27	2009155	30000		spores	3	15	3	mg/kg	qd	5	fidaxomicin	1
https://pubmed.ncbi.nlm.nih.gov/29439962	2018	acute	6	5	n/a	goldensyrian	m			hamster		clindamycin+challenge	cumulativemortality	t	t	27	2009155	30000		spores	100	500	50	mg/kg	bid	5	vancomycin	0.833333
https://pubmed.ncbi.nlm.nih.gov/29439962	2018	acute	6	0	n/a	goldensyrian	m			hamster		clindamycin+challenge	cumulativemortality	t	t	27	2009155	30000		spores							negativecontrol	0
https://pubmed.ncbi.nlm.nih.gov/29439962	2018	sustained	6	0	n/a	goldensyrian	m			hamster		clindamycin+challenge	cumulativemortality	t	t	27	2009155	30000		spores	0.03	0.15	0.03	mg/kg	qd	5	fidaxomicin	0
https://pubmed.ncbi.nlm.nih.gov/29439962	2018	sustained	6	1	n/a	goldensyrian	m			hamster		clindamycin+challenge	cumulativemortality	t	t	27	2009155	30000		spores	0.3	1.5	0.3	mg/kg	qd	5	fidaxomicin	0.166667
https://pubmed.ncbi.nlm.nih.gov/29439962	2018	sustained	6	0	n/a	goldensyrian	m			hamster		clindamycin+challenge	cumulativemortality	t	t	27	2009155	30000		spores							negativecontrol	0
https://pubmed.ncbi.nlm.nih.gov/29439962	2018	acute	5	5	n/a	goldensyrian	m			hamster		clindamycin+challenge	cumulativemortality	t	t	27	2009155	40000		spores	2	10	1	mg/kg	bid	5	fidaxomicin	1
https://pubmed.ncbi.nlm.nih.gov/29439962	2018	acute	5	1	n/a	goldensyrian	m			hamster		clindamycin+challenge	cumulativemortality	t	t	27	2009155	40000		spores	1	1	1	mg/kg	qd	1	fidaxomicin	0.2
https://pubmed.ncbi.nlm.nih.gov/29439962	2018	acute	5	0	n/a	goldensyrian	m			hamster		clindamycin+challenge	cumulativemortality	t	t	27	2009155	40000		spores							negativecontrol	0
https://pubmed.ncbi.nlm.nih.gov/29439962	2018	sustained	5	2	n/a	goldensyrian	m			hamster		clindamycin+challenge	cumulativemortality	t	t	27	2009155	40000		spores	2	10	1	mg/kg	bid	5	fidaxomicin	0.4
https://pubmed.ncbi.nlm.nih.gov/29439962	2018	sustained	5	0	n/a	goldensyrian	m			hamster		clindamycin+challenge	cumulativemortality	t	t	27	2009155	40000		spores	1	1	1	mg/kg	qd	1	fidaxomicin	0
https://pubmed.ncbi.nlm.nih.gov/29439962	2018	sustained	6	3	n/a	goldensyrian	m			hamster		clindamycin+challenge	cumulativemortality	t	t	27	2009155	40000		spores	3	15	3	mg/kg	qd	5	fidaxomicin	0.5
https://pubmed.ncbi.nlm.nih.gov/29439962	2018	sustained	6	0	n/a	goldensyrian	m			hamster		clindamycin+challenge	cumulativemortality	t	t	27	2009155	40000		spores	100	500	50	mg/kg	bid	5	vancomycin	0
https://pubmed.ncbi.nlm.nih.gov/29439962	2018	sustained	5	0	n/a	goldensyrian	m			hamster		clindamycin+challenge	cumulativemortality	t	t	27	2009155	40000		spores							negativecontrol	0
https://pubmed.ncbi.nlm.nih.gov/22869573	2012	acute	6	6	n/a	goldensyrian	n/a		90	hamster		clindamycin+challenge	cumulativemortality	f	t	12	atcc43596	50000000	cfu		300	1500	150	mg/kg	bid	5	metronidazole	1
https://pubmed.ncbi.nlm.nih.gov/22869573	2012	acute	6	6	n/a	goldensyrian	n/a		90	hamster		clindamycin+challenge	cumulativemortality	f	t	12	atcc43596	50000000	cfu		100	500	50	mg/kg	bid	5	rbx14255	1
https://pubmed.ncbi.nlm.nih.gov/22869573	2012	acute	6	6	n/a	goldensyrian	n/a		90	hamster		clindamycin+challenge	cumulativemortality	f	t	12	atcc43596	50000000	cfu		100	500	50	mg/kg	bid	5	vancomycin	1
https://pubmed.ncbi.nlm.nih.gov/22869573	2012	sustained	6	0	n/a	goldensyrian	n/a		90	hamster		clindamycin+challenge	cumulativemortality	f	t	12	atcc43596	50000000	cfu		300	1500	150	mg/kg	bid	5	metronidazole	0
https://pubmed.ncbi.nlm.nih.gov/22869573	2012	sustained	6	3	n/a	goldensyrian	n/a		90	hamster		clindamycin+challenge	cumulativemortality	f	t	12	atcc43596	50000000	cfu		100	500	50	mg/kg	bid	5	rbx14255	0.5
https://pubmed.ncbi.nlm.nih.gov/22869573	2012	sustained	6	0	n/a	goldensyrian	n/a		90	hamster		clindamycin+challenge	cumulativemortality	f	t	12	atcc43596	50000000	cfu		100	500	50	mg/kg	bid	5	vancomycin	0
https://pubmed.ncbi.nlm.nih.gov/33782498	2021	acute	20	20	n/a	goldensyrian	m		90	hamster		clindamycin+challenge	survival	t	t	428	va11	7500000	cfu		20	100	20	mg/kg	qd	5	vancomycin	1
https://pubmed.ncbi.nlm.nih.gov/33782498	2021	acute	20	1	n/a	goldensyrian	m		90	hamster		clindamycin+challenge	survival	t	t	428	va11	7500000	cfu								negativecontrol	0.05
https://pubmed.ncbi.nlm.nih.gov/33782498	2021	sustained	20	14	n/a	goldensyrian	m		90	hamster		clindamycin+challenge	survival	t	t	428	va11	7500000	cfu		20	100	20	mg/kg	qd	5	vancomycin	0.7
https://pubmed.ncbi.nlm.nih.gov/33782498	2021	sustained	20	0	n/a	goldensyrian	m		90	hamster		clindamycin+challenge	survival	t	t	428	va11	7500000	cfu								negativecontrol	0
https://pubmed.ncbi.nlm.nih.gov/25022586	2014	acute	10	10	n/a	goldensyrian	m		100	hamster		challenge+clindamycin	cumulativemortality	t	t	27	va5	894206	cfu		10	50	10	mg/kg	qd	5	smt19969	1
https://pubmed.ncbi.nlm.nih.gov/25022586	2014	acute	20	20	n/a	goldensyrian	m		100	hamster		challenge+clindamycin	cumulativemortality	t	t	27	va5	894206	cfu		20	100	20	mg/kg	qd	5	smt19969	1
https://pubmed.ncbi.nlm.nih.gov/25022586	2014	acute	20	20	n/a	goldensyrian	m		100	hamster		challenge+clindamycin	cumulativemortality	t	t	27	va5	894206	cfu		20	100	20	mg/kg	qd	5	vancomycin	1
https://pubmed.ncbi.nlm.nih.gov/25022586	2014	acute	20	20	n/a	goldensyrian	m		100	hamster		challenge+clindamycin	cumulativemortality	t	t	27	va5	894206	cfu		50	250	50	mg/kg	qd	5	smt19969	1
https://pubmed.ncbi.nlm.nih.gov/25022586	2014	sustained	10	0	n/a	goldensyrian	m		100	hamster		challenge+clindamycin	cumulativemortality	t	t	27	va5	894206	cfu		10	50	10	mg/kg	qd	5	smt19969	0
https://pubmed.ncbi.nlm.nih.gov/25022586	2014	sustained	20	11	n/a	goldensyrian	m		100	hamster		challenge+clindamycin	cumulativemortality	t	t	27	va5	894206	cfu		20	100	20	mg/kg	qd	5	smt19969	0.55
https://pubmed.ncbi.nlm.nih.gov/25022586	2014	sustained	20	11	n/a	goldensyrian	m		100	hamster		challenge+clindamycin	cumulativemortality	t	t	27	va5	894206	cfu		40	200	20	mg/kg	bid	5	vancomycin	0.55
https://pubmed.ncbi.nlm.nih.gov/25022586	2014	sustained	20	14	n/a	goldensyrian	m		100	hamster		challenge+clindamycin	cumulativemortality	t	t	27	va5	894206	cfu		50	250	50	mg/kg	qd	5	smt19969	0.7
https://pubmed.ncbi.nlm.nih.gov/25022586	2014	acute	10	9	n/a	goldensyrian	m		100	hamster		challenge+clindamycin	cumulativemortality	t	t	428	va11	752846	cfu		10	50	10	mg/kg	qd	5	smt19969	0.9
https://pubmed.ncbi.nlm.nih.gov/25022586	2014	acute	20	19	n/a	goldensyrian	m		100	hamster		challenge+clindamycin	cumulativemortality	t	t	428	va11	752846	cfu		20	100	20	mg/kg	qd	5	smt19969	0.95
https://pubmed.ncbi.nlm.nih.gov/25022586	2014	acute	20	20	n/a	goldensyrian	m		100	hamster		challenge+clindamycin	cumulativemortality	t	t	428	va11	752846	cfu		20	100	20	mg/kg	qd	5	vancomycin	1
https://pubmed.ncbi.nlm.nih.gov/25022586	2014	acute	20	19	n/a	goldensyrian	m		100	hamster		challenge+clindamycin	cumulativemortality	t	t	428	va11	752846	cfu		50	250	50	mg/kg	qd	5	smt19969	0.95
https://pubmed.ncbi.nlm.nih.gov/25022586	2014	sustained	10	8	n/a	goldensyrian	m		100	hamster		challenge+clindamycin	cumulativemortality	t	t	428	va11	752846	cfu		10	50	10	mg/kg	qd	5	smt19969	0.8
https://pubmed.ncbi.nlm.nih.gov/25022586	2014	sustained	20	18	n/a	goldensyrian	m		100	hamster		challenge+clindamycin	cumulativemortality	t	t	428	va11	752846	cfu		20	100	20	mg/kg	qd	5	smt19969	0.9
https://pubmed.ncbi.nlm.nih.gov/25022586	2014	sustained	20	12	n/a	goldensyrian	m		100	hamster		challenge+clindamycin	cumulativemortality	t	t	428	va11	752846	cfu		20	100	20	mg/kg	qd	5	vancomycin	0.6
https://pubmed.ncbi.nlm.nih.gov/25022586	2014	sustained	20	19	n/a	goldensyrian	m		100	hamster		challenge+clindamycin	cumulativemortality	t	t	428	va11	752846	cfu		50	250	50	mg/kg	qd	5	smt19969	0.95

## Sheet: Clinical Raw
URL	Title	acute/sustained	daily dosage	total dosage	dosage value	dosage units	dosage times per day	dosage duration	intervention class	intervention	dose dependence	sample group size	prophylactic / therapeutic	Gender	Age Groups	Phases	intervention:Specific	intervention:Variation	outcome count	result
https://ClinicalTrials.gov/show/NCT02626104	Bovine Lactoferrin and Antibiotic-associated Diarrhoea.	sustained							control	100mgofplacebo-maltodextrintwiceadayorallyforthewholeperiodofantibiotictherapy.	no	78	prophylactic	all	child,adult	phase2			71	0.910256
https://ClinicalTrials.gov/show/NCT00958308	Efficacy and Safety Study in the Prevention of Antibiotic-Associated Diarrhea (AAD) and Clostridium Difficile-Associated Diarrhea (CDAD) in Hospitalized Adult Patients Exposed to Nosocomial Infection	sustained			1	capsule			probiotic	bio-k+cl-1285,onecapsule+onecapsuleplacebo	yes	85	prophylactic	all	adult,olderadult	phase3		Lactobacillus acidophilus	77	0.905882
https://ClinicalTrials.gov/show/NCT00958308	Efficacy and Safety Study in the Prevention of Antibiotic-Associated Diarrhea (AAD) and Clostridium Difficile-Associated Diarrhea (CDAD) in Hospitalized Adult Patients Exposed to Nosocomial Infection	sustained			2	capsule			probiotic	bio-k+cl-1285,twocapsules	yes	86	prophylactic	all	adult,olderadult	phase3		Lactobacillus acidophilus	85	0.988372
https://ClinicalTrials.gov/show/NCT02626104	Bovine Lactoferrin and Antibiotic-associated Diarrhoea.	sustained	200		100	mg	bid		other	bovinelactoferrin	no	78	prophylactic	all	child,adult	phase2			62	0.794872
https://ClinicalTrials.gov/show/NCT01983683	Efficacy and Safety of Cadazolid Versus Vancomycin in Subjects With Clostridium Difficile-associated Diarrhea	acute	500	5000	250	mg	bid	10	antibiotic	cadazolid	no	290	therapeutic	all	adult,olderadult	phase3	Cadazolid		234.9	0.806897
https://ClinicalTrials.gov/show/NCT01983683	Efficacy and Safety of Cadazolid Versus Vancomycin in Subjects With Clostridium Difficile-associated Diarrhea	sustained	500	5000	250	mg	bid	10	antibiotic	cadazolid	no	290	therapeutic	all	adult,olderadult	phase3	Cadazolid		183.86	0.631034
https://ClinicalTrials.gov/show/NCT01987895	Efficacy and Safety of Cadazolid Versus Vancomycin in Subjects With Clostridium Difficile - Associated Diarrhea	acute	500	5000	250	mg	bid	10	antibiotic	cadazolid	no	302	therapeutic	all	adult,olderadult	phase3	Cadazolid		253.076	0.837748
https://ClinicalTrials.gov/show/NCT01987895	Efficacy and Safety of Cadazolid Versus Vancomycin in Subjects With Clostridium Difficile - Associated Diarrhea	sustained	500	5000	250	mg	bid	10	antibiotic	cadazolid	no	302	therapeutic	all	adult,olderadult	phase3	Cadazolid		198.112	0.655629
https://ClinicalTrials.gov/show/NCT01222702	Efficacy, Safety and Tolerability of Cadazolid in Subjects With Clostridium Difficile Associated Diarrhea (CDAD)	acute	500	5000	250	mg	bid	10	antibiotic	cadazolid	yes	17	therapeutic	all	adult,olderadult	phase2	Cadazolid		16	0.941176
https://ClinicalTrials.gov/show/NCT01222702	Efficacy, Safety and Tolerability of Cadazolid in Subjects With Clostridium Difficile Associated Diarrhea (CDAD)	acute	1000	10000	500	mg	bid	10	antibiotic	cadazolid	yes	20	therapeutic	all	adult,olderadult	phase2	Cadazolid		18	0.9
https://ClinicalTrials.gov/show/NCT01222702	Efficacy, Safety and Tolerability of Cadazolid in Subjects With Clostridium Difficile Associated Diarrhea (CDAD)	acute	2000	20000	1000	mg	bid	10	antibiotic	cadazolid	yes	19	therapeutic	all	adult,olderadult	phase2	Cadazolid		16	0.842105
https://ClinicalTrials.gov/show/NCT01222702	Efficacy, Safety and Tolerability of Cadazolid in Subjects With Clostridium Difficile Associated Diarrhea (CDAD)	sustained	500	5000	250	mg	bid	10	antibiotic	cadazolid	yes	17	therapeutic	all	adult,olderadult	phase2	Cadazolid		13	0.764706
https://ClinicalTrials.gov/show/NCT01222702	Efficacy, Safety and Tolerability of Cadazolid in Subjects With Clostridium Difficile Associated Diarrhea (CDAD)	sustained	1000	10000	500	mg	bid	10	antibiotic	cadazolid	yes	20	therapeutic	all	adult,olderadult	phase2	Cadazolid		14	0.7
https://ClinicalTrials.gov/show/NCT01222702	Efficacy, Safety and Tolerability of Cadazolid in Subjects With Clostridium Difficile Associated Diarrhea (CDAD)	sustained	2000	20000	1000	mg	bid	10	antibiotic	cadazolid	yes	18	therapeutic	all	adult,olderadult	phase2	Cadazolid		10	0.555556
https://ClinicalTrials.gov/show/NCT01085591	Study of CB-183,315 in Participants With Clostridium Difficile Infection	acute	250	2500	125	mg	bid	10	antibiotic	cb-183,315	yes	66	therapeutic	all	adult,olderadult	phase2	CB-183,315;surotomycin		61	0.924242
https://ClinicalTrials.gov/show/NCT01085591	Study of CB-183,315 in Participants With Clostridium Difficile Infection	acute	500	5000	250	mg	bid	10	antibiotic	cb-183,315	yes	67	therapeutic	all	adult,olderadult	phase2	CB-183,315;surotomycin		58	0.865672
https://ClinicalTrials.gov/show/NCT01085591	Study of CB-183,315 in Participants With Clostridium Difficile Infection	sustained	250	2500	125	mg	bid	10	antibiotic	cb-183,315	yes	61	therapeutic	all	adult,olderadult	phase2	CB-183,315;surotomycin		44	0.721311
https://ClinicalTrials.gov/show/NCT01085591	Study of CB-183,315 in Participants With Clostridium Difficile Infection	sustained	500	5000	250	mg	bid	10	antibiotic	cb-183,315	yes	58	therapeutic	all	adult,olderadult	phase2	CB-183,315;surotomycin		48	0.827586
https://ClinicalTrials.gov/show/NCT02254967	A Phase IIIB/IV Study to Compare the Efficacy of Vancomycin Therapy to Extended Duration of Fidaxomicin Therapy in the Clinical Cure of Clostridium Difficile Infection (CDI) in an Older Population	acute	400	5600	200	mg	bid	5	antibiotic	extended-pulsedfidaxomicin	no	177	therapeutic	all	adult,olderadult	phase4		fidaxomicin;Tiacumicins B	138	0.779661
https://ClinicalTrials.gov/show/NCT02254967	A Phase IIIB/IV Study to Compare the Efficacy of Vancomycin Therapy to Extended Duration of Fidaxomicin Therapy in the Clinical Cure of Clostridium Difficile Infection (CDI) in an Older Population	sustained	400	5600	200	mg	bid	5	antibiotic	extended-pulsedfidaxomicin	no	177	therapeutic	all	adult,olderadult	phase4		fidaxomicin;Tiacumicins B	124	0.700565
https://ClinicalTrials.gov/show/NCT01704937	Fecal Microbiota Transplant (FMT) for Relapsing C. Difficile Infection in Adults and Children Using a Frozen Inoculum	sustained							fmt	fecalmicrobiotatransplant("stooltransplant")fromhealthy,unrelateddonorviacolonoscopy	no	10	therapeutic	all	child,adult,olderadult	phase1		FMT-FD;FMT-G10;FMT-G80;caecal contents;FMT;cecal homogenates	8	0.8
https://ClinicalTrials.gov/show/NCT01704937	Fecal Microbiota Transplant (FMT) for Relapsing C. Difficile Infection in Adults and Children Using a Frozen Inoculum	sustained							fmt	fecalmicrobiotatransplant("stooltransplant")fromhealthy,unrelateddonorviangt	no	10	therapeutic	all	child,adult,olderadult	phase1		FMT-FD;FMT-G10;FMT-G80;caecal contents;FMT;cecal homogenates	6	0.6
https://ClinicalTrials.gov/show/NCT02465463	Early FMT for C.Difficile	sustained	250	250	250	ml	qd	1	fmt	fecalmicrobiotatransplant(fmt):250mlofdonorstoolwillbeinfusedintothecolonbyflexiblesigmoidoscopy	no	4	therapeutic	all	adult,olderadult	phase1|phase2		FMT-FD;FMT-G10;FMT-G80;caecal contents;FMT;cecal homogenates	3	0.75
https://ClinicalTrials.gov/show/NCT02254811	FMT Delivered by Capsule Versus Colonoscopy for Recurrent C. Diff	sustained							fmt	fecalmicrobiotatransplantdeliveredbycolonoscopy	no	59	therapeutic	all	adult,olderadult	phase2|phase3		FMT-FD;FMT-G10;FMT-G80;caecal contents;FMT;cecal homogenates	50	0.847458
https://ClinicalTrials.gov/show/NCT02254811	FMT Delivered by Capsule Versus Colonoscopy for Recurrent C. Diff	sustained							fmt	fecalmicrobiotatransplantisdeliveredbyoralcapsules	no	57	therapeutic	all	adult,olderadult	phase2|phase3		FMT-FD;FMT-G10;FMT-G80;caecal contents;FMT;cecal homogenates	51	0.894737
https://ClinicalTrials.gov/show/NCT02148601	Fecal Microbiota Transplantation by Colonoscopy for Recurrent C. Difficile Infection	sustained							fmt	fecalmicrobiotatransplantation	no	20	therapeutic	all	adult,olderadult	phase2		FMT-FD;FMT-G10;FMT-G80;caecal contents;FMT;cecal homogenates	18	0.9
https://ClinicalTrials.gov/show/NCT03106844	The ICON Study: Outcomes After FMT for Patients With IBD and CDI	sustained							fmt	fecalmicrobiotatransplantation	no	49	therapeutic	all	adult,olderadult	phase1|phase2		FMT-FD;FMT-G10;FMT-G80;caecal contents;FMT;cecal homogenates	45	0.918367
https://ClinicalTrials.gov/show/NCT01087892	Probiotics in Preventing Antibiotic Associated Diarrhoea Including Clostridium Difficile Infection	acute	200	1400	100	g	bid	7	probiotic	fermentedmilkpreparationofl.caseidn114001(108colony-formingunits(cfu)/ml)aswellastworegularyoghurtculturesl.delbrueckiisubspeciesbulgaricusands.thermophilus(106cfu/ml)	no	549	prophylactic	all	adult,olderadult	notapplicable			541	0.985428
https://ClinicalTrials.gov/show/NCT01591863	Safety, Tolerability, and Pharmacokinetics of Fidaxomicin in Pediatric Subjects With Clostridium Difficile-associated Diarrhea (CDAD)	acute	400	4000	200	mg	bid	10	antibiotic	fidaxomicin	no	38	therapeutic	all	child,adult	phase2	fidaxomicin;Tiacumicins B		34.998	0.894737
https://ClinicalTrials.gov/show/NCT01591863	Safety, Tolerability, and Pharmacokinetics of Fidaxomicin in Pediatric Subjects With Clostridium Difficile-associated Diarrhea (CDAD)	sustained	400	4000	200	mg	bid	10	antibiotic	fidaxomicin	no	38	therapeutic	all	child,adult	phase2	fidaxomicin;Tiacumicins B		25.004	0.657895
https://ClinicalTrials.gov/show/NCT02179658	A Study to Compare Safety and Efficacy of OPT-80(Fidaxomicin) With Vancomycin in Subjects With Clostridium Difficile-associated Diarrhea (CDAD)	acute	400	4000	200	mg	bid	10	antibiotic	fidaxomicin	no	104	therapeutic	all	adult,olderadult	phase3	fidaxomicin;Tiacumicins B		87	0.836538
https://ClinicalTrials.gov/show/NCT02179658	A Study to Compare Safety and Efficacy of OPT-80(Fidaxomicin) With Vancomycin in Subjects With Clostridium Difficile-associated Diarrhea (CDAD)	sustained	400	4000	200	mg	bid	10	antibiotic	fidaxomicin	no	104	therapeutic	all	adult,olderadult	phase3	fidaxomicin;Tiacumicins B		70	0.673077
https://ClinicalTrials.gov/show/NCT02743234	Fecal Microbiota Transplantation for Relapsing Clostridium Difficile Infection	acute	400	4000	200	mg	bid	10	antibiotic	fidaxomicin	no	24	therapeutic	all	adult,olderadult	phase3	fidaxomicin;Tiacumicins B		8	0.333333
https://ClinicalTrials.gov/show/NCT02743234	Fecal Microbiota Transplantation for Relapsing Clostridium Difficile Infection	sustained	400	4000	200	mg	bid	10	antibiotic	fidaxomicin	no	24	therapeutic	all	adult,olderadult	phase3	fidaxomicin;Tiacumicins B		13	0.541667
https://ClinicalTrials.gov/show/NCT02784002	A Study of Ridinilazole (SMT19969) Compared With Fidaxomicin for the Treatment of Clostridium Difficile Infection (CDI)	sustained	400	4000	200	mg	bid	10	antibiotic	fidaxomicin	no	13	therapeutic	all	adult,olderadult	phase2	fidaxomicin;Tiacumicins B		6	0.461538
https://ClinicalTrials.gov/show/NCT02218372	A Study to Investigate the Safety and Efficacy of Fidaxomicin (Oral Suspension or Tablets) and Vancomycin (Oral Liquid or Capsules) in Pediatric Subjects With Clostridium Difficile-associated Diarrhea (CDAD)	acute	400	4000	200	mg	bid	10	antibiotic	fidaxomicin	no	98	therapeutic	all	child	phase3	fidaxomicin;Tiacumicins B		76.048	0.77551
https://ClinicalTrials.gov/show/NCT02218372	A Study to Investigate the Safety and Efficacy of Fidaxomicin (Oral Suspension or Tablets) and Vancomycin (Oral Liquid or Capsules) in Pediatric Subjects With Clostridium Difficile-associated Diarrhea (CDAD)	sustained	400	4000	200	mg	bid	10	antibiotic	fidaxomicin	no	76	therapeutic	all	child	phase3	fidaxomicin;Tiacumicins B		71.972	0.934211
https://ClinicalTrials.gov/show/NCT01691248	Safety and Efficacy of Fidaxomicin Versus Placebo for Prophylaxis Against Clostridium Difficile-Associated Diarrhea in Adults Undergoing Hematopoietic Stem Cell Transplantation (MK-5119-001)	sustained	200	16000	200	mg	qd	40	antibiotic	fidaxomicin	no	301	prophylactic	all	adult,olderadult	phase3	fidaxomicin;Tiacumicins B		214.914	0.710963
https://ClinicalTrials.gov/show/NCT02437591	Study to Evaluate the Pharmacokinetics of Fidaxomicin in Inflammatory Bowel Disease (IBD) Subjects With Clostridium Difficile Infection (CDI)	acute	400	4000	200	mg	bid	10	antibiotic	fidaxomicin	no	25	therapeutic	all	adult,olderadult	phase4	fidaxomicin;Tiacumicins B		20	0.8
https://ClinicalTrials.gov/show/NCT00314951	Fidaxomicin Versus Vancomycin for the Treatment of Clostridium Difficile-Associated Diarrhea (CDAD) (MK-5119-018)	acute	400	4000	200	mg	bid	10	antibiotic	fidaxomicin	no	289	therapeutic	all	child,adult,olderadult	phase3	fidaxomicin;Tiacumicins B		254.898	0.878893
https://ClinicalTrials.gov/show/NCT00314951	Fidaxomicin Versus Vancomycin for the Treatment of Clostridium Difficile-Associated Diarrhea (CDAD) (MK-5119-018)	sustained	400	4000	200	mg	bid	10	antibiotic	fidaxomicin	no	255	therapeutic	all	child,adult,olderadult	phase3	fidaxomicin;Tiacumicins B		214.965	0.839216
https://ClinicalTrials.gov/show/NCT01818141	Study to Assess Inhibition of Spore Production in Patients With C. Difficile Infections: Fidaxomicin Versus Vancomycin	acute	400	4000	200	mg	bid	10	antibiotic	fidaxomicin200mgbymouthevery12hoursfor10days	no	12	therapeutic	all	adult,olderadult	phase4	fidaxomicin;Tiacumicins B		11	0.916667
https://ClinicalTrials.gov/show/NCT01818141	Study to Assess Inhibition of Spore Production in Patients With C. Difficile Infections: Fidaxomicin Versus Vancomycin	acute	400	4000	200	mg	bid	10	antibiotic	fidaxomicin200mgbymouthevery12hoursfor10days	no	7	therapeutic	all	adult,olderadult	phase4	fidaxomicin;Tiacumicins B		4	0.571429
https://ClinicalTrials.gov/show/NCT02743234	Fecal Microbiota Transplantation for Relapsing Clostridium Difficile Infection	acute							fmt	fmtfollowing4-10daysvancomycin125mgx4daily	no	24	therapeutic	all	adult,olderadult	phase3		FMT-FD;FMT-G10;FMT-G80;caecal contents;FMT;cecal homogenates	17	0.708333
https://ClinicalTrials.gov/show/NCT02743234	Fecal Microbiota Transplantation for Relapsing Clostridium Difficile Infection	sustained							fmt	fmtfollowing4-10daysvancomycin125mgx4daily	no	24	therapeutic	all	adult,olderadult	phase3		FMT-FD;FMT-G10;FMT-G80;caecal contents;FMT;cecal homogenates	22	0.916667
https://ClinicalTrials.gov/show/NCT01398969	Multi-Centre Trial of Fresh vs. Frozen-and-Thawed HBT(Fecal Transplant)for Recurrent CDI	sustained							fmt	freshhumanbiotherapy	no	111	therapeutic	all	adult,olderadult	phase2		FMT-FD;FMT-G10;FMT-G80;caecal contents;FMT;cecal homogenates	78	0.702703
https://ClinicalTrials.gov/show/NCT01398969	Multi-Centre Trial of Fresh vs. Frozen-and-Thawed HBT(Fecal Transplant)for Recurrent CDI	sustained							fmt	frozen-and-thawedhumanbiotherapy	no	108	therapeutic	all	adult,olderadult	phase2		FMT-FD;FMT-G10;FMT-G80;caecal contents;FMT;cecal homogenates	81	0.75
https://ClinicalTrials.gov/show/NCT02951702	Oral Vancomyin for Primary Clostridium Difficile Infection Prophylaxis in Patients Receiving High-Risk Antibiotics	sustained							control	historicalcontrol	no	34	prophylactic	all	olderadult	phase4			32	0.941176
https://ClinicalTrials.gov/show/NCT02865616	MET-2 Clinical Study for Recurrent Clostridium Difficile Infection (CDI)	sustained							probiotic	met-2	no	19	therapeutic	all	adult,olderadult	phase1			18	0.947368
https://ClinicalTrials.gov/show/NCT00182429	Efficacy of Metronidazole Versus Metronidazole and Rifampin in CDAD Treatment	sustained	1500	15000	500	mg	tid	10	antibiotic	metronidazole	no	20	therapeutic	all	child,adult,olderadult	phase3	metronidazole		4	0.2
https://ClinicalTrials.gov/show/NCT00196794	A Study of GT267-004 Versus Vancomycin and GT267-004 Versus Metronidazole in Patients With C. Difficile-Associated Diarrhea	acute	1500	15000	375	mg	qid	10	antibiotic	metronidazole	no	135	therapeutic	all	adult,olderadult	phase3	metronidazole		98.955	0.725926
https://ClinicalTrials.gov/show/NCT00196794	A Study of GT267-004 Versus Vancomycin and GT267-004 Versus Metronidazole in Patients With C. Difficile-Associated Diarrhea	sustained	1500	15000	375	mg	qid	10	antibiotic	metronidazole	no	106	therapeutic	all	adult,olderadult	phase3	metronidazole		85.966	0.801887
https://ClinicalTrials.gov/show/NCT00106509	A Study of GT267-004 Versus Vancomycin and GT267-004 Versus Metronidazole in Patients With C.Difficile - Associated Diarrhea	acute	1500	15000	375	mg	qid	10	antibiotic	metronidazole	no	143	therapeutic	all	adult,olderadult	phase3	metronidazole		102.96	0.713287
https://ClinicalTrials.gov/show/NCT00106509	A Study of GT267-004 Versus Vancomycin and GT267-004 Versus Metronidazole in Patients With C.Difficile - Associated Diarrhea	sustained	1500	15000	375	mg	qid	10	antibiotic	metronidazole	no	107	therapeutic	all	adult,olderadult	phase3	metronidazole		78.003	0.728972
https://ClinicalTrials.gov/show/NCT01241552	A Study of MK-3415, MK-6072, and MK-3415A in Participants Receiving Antibiotic Therapy for Clostridium Difficile Infection (MK-3415A-001)	sustained	10	10	10	mg/kg	qd	1	antibody	mk-3415+standardofcare	no	232	therapeutic	all	adult,olderadult	phase3		CDA1	171.912	0.737069
https://ClinicalTrials.gov/show/NCT01513239	A Study of MK-6072 and MK-3415A in Participants Receiving Antibiotic Therapy for Clostridium Difficile Infection (MK-3415A-002)	sustained	10	10	10	mg/kg	qd	1	antibody	mk-6072+standardofcare	no	390	therapeutic	all	adult,olderadult	phase3		MDX1388	331.89	0.848718
https://ClinicalTrials.gov/show/NCT01241552	A Study of MK-3415, MK-6072, and MK-3415A in Participants Receiving Antibiotic Therapy for Clostridium Difficile Infection (MK-3415A-001)	sustained	10	10	10	mg/kg	qd	1	antibody	mk-6072+standardofcare	no	386	therapeutic	all	adult,olderadult	phase3		MDX1388	318.836	0.823834
https://ClinicalTrials.gov/show/NCT00304356	Compassionate Use of Nitazoxanide for the Treatment of Clostridium Difficile Infection	sustained	1000		500	mg	bid		other	nitazoxanide	no	27	therapeutic	all	adult,olderadult	phase3	Nitazoxanide		27	1
https://ClinicalTrials.gov/show/NCT02465463	Early FMT for C.Difficile	sustained							control	nointervention	no	4	therapeutic	all	adult,olderadult	phase1|phase2			2	0.5
https://ClinicalTrials.gov/show/NCT00350298	Study of the Clinical Effectiveness of a Human Monoclonal Antibody to C. Difficile Toxin A and Toxin B in Patients With Clostridium Difficile Associated Disease	sustained							control	normalsaline	no	99	therapeutic	all	adult,olderadult	phase2			74	0.747475
https://ClinicalTrials.gov/show/NCT00097422	OPT-80 in Clostridium Difficile-Associated Diarrhea (CDAD)	acute	100	1000	50	mg	bid	10	antibiotic	opt-80	yes	14	therapeutic	all	adult,olderadult	phase2	fidaxomicin;Tiacumicins B		10	0.714286
https://ClinicalTrials.gov/show/NCT00097422	OPT-80 in Clostridium Difficile-Associated Diarrhea (CDAD)	acute	200	2000	100	mg	bid	10	antibiotic	opt-80	yes	15	therapeutic	all	adult,olderadult	phase2	fidaxomicin;Tiacumicins B		12	0.8
https://ClinicalTrials.gov/show/NCT00097422	OPT-80 in Clostridium Difficile-Associated Diarrhea (CDAD)	acute	400	4000	200	mg	bid	10	antibiotic	opt-80	yes	16	therapeutic	all	adult,olderadult	phase2	fidaxomicin;Tiacumicins B		15	0.9375
https://ClinicalTrials.gov/show/NCT00097422	OPT-80 in Clostridium Difficile-Associated Diarrhea (CDAD)	sustained	100	1000	50	mg	bid	10	antibiotic	opt-80	yes	10	therapeutic	all	adult,olderadult	phase2	fidaxomicin;Tiacumicins B		9	0.9
https://ClinicalTrials.gov/show/NCT00097422	OPT-80 in Clostridium Difficile-Associated Diarrhea (CDAD)	sustained	200	2000	100	mg	bid	10	antibiotic	opt-80	yes	12	therapeutic	all	adult,olderadult	phase2	fidaxomicin;Tiacumicins B		12	1
https://ClinicalTrials.gov/show/NCT00097422	OPT-80 in Clostridium Difficile-Associated Diarrhea (CDAD)	sustained	400	4000	200	mg	bid	10	antibiotic	opt-80	yes	15	therapeutic	all	adult,olderadult	phase2	fidaxomicin;Tiacumicins B		14	0.933333
https://ClinicalTrials.gov/show/NCT03110133	Efficacy, Safety, and Tolerability Study of Oral Full-Spectrum MicrobiotaTM (CP101) in Subjects With Recurrent C. Diff	sustained							probiotic	oralfull-spectrummicrobiotatm(cp101)	no	102	therapeutic	all	adult,olderadult	phase2			76	0.745098
https://ClinicalTrials.gov/show/NCT01085591	Study of CB-183,315 in Participants With Clostridium Difficile Infection	acute	500	5000	125	mg	qid	10	antibiotic	oralvancomycin	yes	66	therapeutic	all	adult,olderadult	phase2	vancomycin		59	0.893939
https://ClinicalTrials.gov/show/NCT01085591	Study of CB-183,315 in Participants With Clostridium Difficile Infection	sustained	500	5000	125	mg	qid	10	antibiotic	oralvancomycin	yes	59	therapeutic	all	adult,olderadult	phase2	vancomycin		38	0.644068
https://ClinicalTrials.gov/show/NCT02951702	Oral Vancomyin for Primary Clostridium Difficile Infection Prophylaxis in Patients Receiving High-Risk Antibiotics	sustained	125		125	mg	qd		antibiotic	oralvancomycin125mgdaily	no	17	prophylactic	all	olderadult	phase4	vancomycin		17	1
https://ClinicalTrials.gov/show/NCT01914731	Fecal Microbiota Transplant for Relapsing Clostridium Difficile Infection in Adults and Children Using a Frozen Encapsulated Inoculum	acute							fmt	oral,capsulized,frozenfecalmicrobiotatransplantation	no	20	therapeutic	all	child,adult,olderadult	phase1		FMT-FD;FMT-G10;FMT-G80;caecal contents;FMT;cecal homogenates	14	0.7
https://ClinicalTrials.gov/show/NCT01914731	Fecal Microbiota Transplant for Relapsing Clostridium Difficile Infection in Adults and Children Using a Frozen Encapsulated Inoculum	acute							fmt	oral,capsulized,frozenfecalmicrobiotatransplantation	no	6	therapeutic	all	child,adult,olderadult	phase1		FMT-FD;FMT-G10;FMT-G80;caecal contents;FMT;cecal homogenates	5	0.833333
https://ClinicalTrials.gov/show/NCT01914731	Fecal Microbiota Transplant for Relapsing Clostridium Difficile Infection in Adults and Children Using a Frozen Encapsulated Inoculum	sustained							fmt	oral,capsulized,frozenfecalmicrobiotatransplantation	no	20	therapeutic	all	child,adult,olderadult	phase1		FMT-FD;FMT-G10;FMT-G80;caecal contents;FMT;cecal homogenates	19	0.95
https://ClinicalTrials.gov/show/NCT00468728	PAR-101/OPT-80 Versus Vancomycin for the Treatment of Clostridium Difficile-Associated Diarrhea (CDAD)	acute	400	4000	200	mg	bid	10	antibiotic	par-101/opt-80	no	253	therapeutic	all	child,adult,olderadult	phase3	fidaxomicin;Tiacumicins B		221.881	0.873518
https://ClinicalTrials.gov/show/NCT00468728	PAR-101/OPT-80 Versus Vancomycin for the Treatment of Clostridium Difficile-Associated Diarrhea (CDAD)	sustained	400	4000	200	mg	bid	10	antibiotic	par-101/opt-80	no	222	therapeutic	all	child,adult,olderadult	phase3	fidaxomicin;Tiacumicins B		194.028	0.873874
https://ClinicalTrials.gov/show/NCT02437487	SER-109 Versus Placebo to Prevent Recurrent Clostridium Difficile Infection (RCDI)	acute							control	placebo	no	30	therapeutic	all	adult,olderadult	phase2			14	0.466667
https://ClinicalTrials.gov/show/NCT02437487	SER-109 Versus Placebo to Prevent Recurrent Clostridium Difficile Infection (RCDI)	sustained							control	placebo	no	30	therapeutic	all	adult,olderadult	phase2			14	0.466667
https://ClinicalTrials.gov/show/NCT01259726	Safety and Efficacy Study of VP20621 for Prevention of Recurrent Clostridium Difficile Infection	sustained							control	placebo	yes	43	therapeutic	all	adult,olderadult	phase2			30	0.697674
https://ClinicalTrials.gov/show/NCT02299570	Microbiota Restoration Therapy for Recurrent Clostridium Difficile Infection	sustained							control	placebo	yes	44	therapeutic	all	adult,olderadult	phase2			19	0.431818
https://ClinicalTrials.gov/show/NCT01691248	Safety and Efficacy of Fidaxomicin Versus Placebo for Prophylaxis Against Clostridium Difficile-Associated Diarrhea in Adults Undergoing Hematopoietic Stem Cell Transplantation (MK-5119-001)	sustained							control	placebo	no	209	prophylactic	all	adult,olderadult	phase3			144.628	0.688995
https://ClinicalTrials.gov/show/NCT00958308	Efficacy and Safety Study in the Prevention of Antibiotic-Associated Diarrhea (AAD) and Clostridium Difficile-Associated Diarrhea (CDAD) in Hospitalized Adult Patients Exposed to Nosocomial Infection	sustained							control	placebo	yes	84	prophylactic	all	adult,olderadult	phase3			64	0.761905
https://ClinicalTrials.gov/show/NCT01680874	Probiotics for Clostridium Difficile Infection in Older Adults	sustained							control	placebo	no	15	therapeutic	all	adult,olderadult	phase2			14	0.933333
https://ClinicalTrials.gov/show/NCT01087892	Probiotics in Preventing Antibiotic Associated Diarrhoea Including Clostridium Difficile Infection	acute							control	placebo	no	577	prophylactic	all	adult,olderadult	notapplicable			566	0.980936
https://ClinicalTrials.gov/show/NCT03110133	Efficacy, Safety, and Tolerability Study of Oral Full-Spectrum MicrobiotaTM (CP101) in Subjects With Recurrent C. Diff	sustained							control	placebo	no	96	therapeutic	all	adult,olderadult	phase2			59	0.614583
https://ClinicalTrials.gov/show/NCT01295918	Probiotic Lactobacillus Reuteri to Prevent Antibiotic-associated Diarrhea and Clostridium Difficile-related Infections in Hospitalized Children	sustained							control	placebo	no	48	prophylactic	all	child,adult	phase3			47	0.979167
https://ClinicalTrials.gov/show/NCT01670149	Rifaximin for Preventing Relapse of Clostridium Associated Diarrhoea	sustained							control	placebo	no	61	prophylactic	all	adult,olderadult	phase4			43	0.704918
https://ClinicalTrials.gov/show/NCT00973908	Probiotics for the Prevention of Antibiotics Associated Diarrhoea and Clostridium Difficile Associated Diarrhoea	acute							control	placebo	no	117	prophylactic	all	adult,olderadult	phase2|phase3			117	1
https://ClinicalTrials.gov/show/NCT02563106	A Study of SYN-004 for the Prevention of C.Diff in Patients With a LRTI	sustained							control	placebo	no	206	prophylactic	all	adult,olderadult	phase2			199	0.966019
https://ClinicalTrials.gov/show/NCT01513239	A Study of MK-6072 and MK-3415A in Participants Receiving Antibiotic Therapy for Clostridium Difficile Infection (MK-3415A-002)	sustained							control	placebo+standardofcare	no	378	therapeutic	all	adult,olderadult	phase3		vancomycin;vancomycin + metronidazole;metronidazole	280.854	0.740741
https://ClinicalTrials.gov/show/NCT01241552	A Study of MK-3415, MK-6072, and MK-3415A in Participants Receiving Antibiotic Therapy for Clostridium Difficile Infection (MK-3415A-001)	sustained							antibiotic	placebo+standardofcare	no	395	therapeutic	all	adult,olderadult	phase3		vancomycin;vancomycin + metronidazole;metronidazole	285.98	0.721519
https://ClinicalTrials.gov/show/NCT01680874	Probiotics for Clostridium Difficile Infection in Older Adults	sustained			1	capsule	qd	28	probiotic	probioticcombinationwhichwillconsistofequalamountsoflactobacillusacidophilusncfm®(atcc700396),lactobacillusparacaseilpc-37(atccsd5275),bifidobacteriumlactisbi-07(atccsc5220),andbifidobacteriumlactisbl-04(atccsd5219)	no	16	therapeutic	all	adult,olderadult	phase2		consortium of probiotics including five Lactobacilli strains and two Bifidobacterium strains	15	0.9375
https://ClinicalTrials.gov/show/NCT00973908	Probiotics for the Prevention of Antibiotics Associated Diarrhoea and Clostridium Difficile Associated Diarrhoea	acute	2	14	1	sachet	bid	7	probiotic	probioticformulationvsl#3	no	112	prophylactic	all	adult,olderadult	phase2|phase3			112	1
https://ClinicalTrials.gov/show/NCT01295918	Probiotic Lactobacillus Reuteri to Prevent Antibiotic-associated Diarrhea and Clostridium Difficile-related Infections in Hospitalized Children	sustained	100000000	700000000	100000000	cfu	qd	7	probiotic	probioticsupplementcontaining1x108cfulactobacillusreuteridsm17938intheformofonechewabletabletonceperda	no	49	prophylactic	all	child,adult	phase3		Lactobacillus reuteri, LMG P-27481	48	0.979592
https://ClinicalTrials.gov/show/NCT02589847	Microbiota Restoration Therapy for Recurrent Clostridium Difficile Infection	acute							probiotic	rbx2660	no	142	therapeutic	all	adult,olderadult	phase2			112	0.788732
https://ClinicalTrials.gov/show/NCT02589847	Microbiota Restoration Therapy for Recurrent Clostridium Difficile Infection	sustained							probiotic	rbx2660	no	142	therapeutic	all	adult,olderadult	phase2			112	0.788732
https://ClinicalTrials.gov/show/NCT02299570	Microbiota Restoration Therapy for Recurrent Clostridium Difficile Infection	sustained			2	enema			probiotic	rbx2660	yes	45	therapeutic	all	adult,olderadult	phase2			25	0.555556
https://ClinicalTrials.gov/show/NCT02299570	Microbiota Restoration Therapy for Recurrent Clostridium Difficile Infection	sustained			1	enema			probiotic	rbx2660	yes	44	therapeutic	all	adult,olderadult	phase2			25	0.568182
https://ClinicalTrials.gov/show/NCT01925417	Microbiota Restoration Therapy for Recurrent Clostridium Difficile-associated Diarrhea	sustained							probiotic	rbx2660	no	31	therapeutic	all	adult,olderadult	phase2			27	0.870968
https://ClinicalTrials.gov/show/NCT02981316	Treatment of Recurrent Clostridium Difficile Infection With RBX7455	sustained	8	32	4	capsules	bid	4	probiotic	rbx7455	yes	10	therapeutic	all	adult,olderadult	phase1			9	0.9
https://ClinicalTrials.gov/show/NCT02981316	Treatment of Recurrent Clostridium Difficile Infection With RBX7455	sustained	8	16	4	capsules	bid	2	probiotic	rbx7455	yes	10	therapeutic	all	adult,olderadult	phase1			8	0.8
https://ClinicalTrials.gov/show/NCT02981316	Treatment of Recurrent Clostridium Difficile Infection With RBX7455	sustained	4	8	2	capsules	bid	2	probiotic	rbx7455	yes	10	therapeutic	all	adult,olderadult	phase1			10	1
https://ClinicalTrials.gov/show/NCT02092935	A Study of SMT19969 Compared With Vancomycin for the Treatment of Clostridium Difficile-Associated Diarrhoea (CDAD)	acute	400	4000	200	mg	bid	10	antibiotic	ridinilazole	no	36	therapeutic	all	adult,olderadult	phase2	SMT19969 [2,2'-bis(4-pyridyl)3H,3'-H 5,5-bibenzimidazole];SMT19969		28	0.777778
https://ClinicalTrials.gov/show/NCT02092935	A Study of SMT19969 Compared With Vancomycin for the Treatment of Clostridium Difficile-Associated Diarrhoea (CDAD)	sustained	400	4000	200	mg	bid	10	antibiotic	ridinilazole	no	28	therapeutic	all	adult,olderadult	phase2	SMT19969 [2,2'-bis(4-pyridyl)3H,3'-H 5,5-bibenzimidazole];SMT19969		24	0.857143
https://ClinicalTrials.gov/show/NCT02784002	A Study of Ridinilazole (SMT19969) Compared With Fidaxomicin for the Treatment of Clostridium Difficile Infection (CDI)	sustained	400	4000	200	mg	bid	10	antibiotic	ridinilazole	no	14	therapeutic	all	adult,olderadult	phase2	SMT19969 [2,2'-bis(4-pyridyl)3H,3'-H 5,5-bibenzimidazole];SMT19969		7	0.5
https://ClinicalTrials.gov/show/NCT01670149	Rifaximin for Preventing Relapse of Clostridium Associated Diarrhoea	sustained	1200	25200	400	mg	tid	14	antibiotic	rifaximin	no	69	prophylactic	all	adult,olderadult	phase4	rifaximin		58	0.84058
https://ClinicalTrials.gov/show/NCT00269399	A Trial to Compare Xifaxan to Vancomycin for the Treatment of Clostridium Difficile-Associated Diarrhea (CDAD)	acute	1200	12000	400	mg	tid	10	antibiotic	rifaximin	no	117	therapeutic	all	adult,olderadult	phase3	rifaximin		67	0.57265
https://ClinicalTrials.gov/show/NCT00269399	A Trial to Compare Xifaxan to Vancomycin for the Treatment of Clostridium Difficile-Associated Diarrhea (CDAD)	sustained	1200	12000	400	mg	tid	10	antibiotic	rifaximin	no	67	therapeutic	all	adult,olderadult	phase3	rifaximin		61	0.910448
https://ClinicalTrials.gov/show/NCT02437487	SER-109 Versus Placebo to Prevent Recurrent Clostridium Difficile Infection (RCDI)	acute			1	108sporq			probiotic	ser-109	no	59	therapeutic	all	adult,olderadult	phase2			33	0.559322
https://ClinicalTrials.gov/show/NCT02437487	SER-109 Versus Placebo to Prevent Recurrent Clostridium Difficile Infection (RCDI)	sustained			1	108sporq			probiotic	ser-109	no	59	therapeutic	all	adult,olderadult	phase2			33	0.559322
https://ClinicalTrials.gov/show/NCT02148601	Fecal Microbiota Transplantation by Colonoscopy for Recurrent C. Difficile Infection	sustained							antibiotic	standardantibiotictherapy	no	19	therapeutic	all	adult,olderadult	phase2		vancomycin;vancomycin + metronidazole;metronidazole	5	0.263158
https://ClinicalTrials.gov/show/NCT02589847	Microbiota Restoration Therapy for Recurrent Clostridium Difficile Infection	acute							antibiotic	standardofcareantibiotics	no	75	therapeutic	all	adult,olderadult	phase2		vancomycin;vancomycin + metronidazole;metronidazole	23	0.306667
https://ClinicalTrials.gov/show/NCT02589847	Microbiota Restoration Therapy for Recurrent Clostridium Difficile Infection	sustained							antibiotic	standardofcareantibiotics	no	75	therapeutic	all	adult,olderadult	phase2		vancomycin;vancomycin + metronidazole;metronidazole	23	0.306667
https://ClinicalTrials.gov/show/NCT01597505	Study of CB-183,315 in Participants With Clostridium Difficile Associated Diarrhea (MK-4261-005)	acute	500	5000	250	mg	bid	10	antibiotic	surotomycin	no	290	therapeutic	all	adult,olderadult	phase3	CB-183,315;surotomycin		229.1	0.789655
https://ClinicalTrials.gov/show/NCT01597505	Study of CB-183,315 in Participants With Clostridium Difficile Associated Diarrhea (MK-4261-005)	sustained	500	5000	250	mg	bid	10	antibiotic	surotomycin	no	290	therapeutic	all	adult,olderadult	phase3	CB-183,315;surotomycin		175.74	0.603448
https://ClinicalTrials.gov/show/NCT01598311	A Study of CB-183,315 in Participants With Clostridium Difficile Associated Diarrhea (MK-4261-006)	acute	500	5000	250	mg	bid	10	antibiotic	surotomycin	no	285	therapeutic	all	adult,olderadult	phase3	CB-183,315;surotomycin		237.69	0.831579
https://ClinicalTrials.gov/show/NCT01598311	A Study of CB-183,315 in Participants With Clostridium Difficile Associated Diarrhea (MK-4261-006)	sustained	500	5000	250	mg	bid	10	antibiotic	surotomycin	no	285	therapeutic	all	adult,olderadult	phase3	CB-183,315;surotomycin		180.405	0.631579
https://ClinicalTrials.gov/show/NCT02563106	A Study of SYN-004 for the Prevention of C.Diff in Patients With a LRTI	sustained	600	4800	150	mg	qid	8	other	syn-004	no	206	prophylactic	all	adult,olderadult	phase2			204	0.990291
https://ClinicalTrials.gov/show/NCT00196794	A Study of GT267-004 Versus Vancomycin and GT267-004 Versus Metronidazole in Patients With C. Difficile-Associated Diarrhea	acute	9	135	3	g	tid	14	antibiotic	tolevamerpotassium-sodium(gt267-004)	no	268	therapeutic	all	adult,olderadult	phase3	GT160-246		112.024	0.41791
https://ClinicalTrials.gov/show/NCT00196794	A Study of GT267-004 Versus Vancomycin and GT267-004 Versus Metronidazole in Patients With C. Difficile-Associated Diarrhea	sustained	9	135	3	g	tid	14	antibiotic	tolevamerpotassium-sodium(gt267-004)	no	105	therapeutic	all	adult,olderadult	phase3	GT160-246		99.015	0.942857
https://ClinicalTrials.gov/show/NCT00106509	A Study of GT267-004 Versus Vancomycin and GT267-004 Versus Metronidazole in Patients With C.Difficile - Associated Diarrhea	acute	9	135	3	g	tid	14	antibiotic	tolevamerpotassium-sodium(gt267-004)	no	266	therapeutic	all	adult,olderadult	phase3	GT160-246		123.956	0.462406
https://ClinicalTrials.gov/show/NCT00106509	A Study of GT267-004 Versus Vancomycin and GT267-004 Versus Metronidazole in Patients With C.Difficile - Associated Diarrhea	sustained	9	135	3	g	tid	14	antibiotic	tolevamerpotassium-sodium(gt267-004)	no	117	therapeutic	all	adult,olderadult	phase3	GT160-246		113.022	0.965812
https://ClinicalTrials.gov/show/NCT02423967	Fresh Versus Frozen Stool for Fecal Transplant in Children	sustained							fmt	transplantusesfreshfamilialstool	no	2	therapeutic	all	child,adult	phase1		FMT-FD;FMT-G10;FMT-G80;caecal contents;FMT;cecal homogenates	1	0.5
https://ClinicalTrials.gov/show/NCT02423967	Fresh Versus Frozen Stool for Fecal Transplant in Children	sustained							fmt	transplantusesfrozenanonymousstool	no	6	therapeutic	all	child,adult	phase1		FMT-FD;FMT-G10;FMT-G80;caecal contents;FMT;cecal homogenates	6	1
https://ClinicalTrials.gov/show/NCT01983683	Efficacy and Safety of Cadazolid Versus Vancomycin in Subjects With Clostridium Difficile-associated Diarrhea	acute	500	5000	125	mg	qid	10	antibiotic	vancomycin	no	301	therapeutic	all	adult,olderadult	phase3	vancomycin		257.957	0.853821
https://ClinicalTrials.gov/show/NCT01983683	Efficacy and Safety of Cadazolid Versus Vancomycin in Subjects With Clostridium Difficile-associated Diarrhea	sustained	500	5000	125	mg	qid	10	antibiotic	vancomycin	no	301	therapeutic	all	adult,olderadult	phase3	vancomycin		186.018	0.61794
https://ClinicalTrials.gov/show/NCT01987895	Efficacy and Safety of Cadazolid Versus Vancomycin in Subjects With Clostridium Difficile - Associated Diarrhea	acute	500	5000	125	mg	qid	10	antibiotic	vancomycin	no	318	therapeutic	all	adult,olderadult	phase3	vancomycin		270.936	0.849057
https://ClinicalTrials.gov/show/NCT01987895	Efficacy and Safety of Cadazolid Versus Vancomycin in Subjects With Clostridium Difficile - Associated Diarrhea	sustained	500	5000	125	mg	qid	10	antibiotic	vancomycin	no	318	therapeutic	all	adult,olderadult	phase3	vancomycin		198.114	0.622642
https://ClinicalTrials.gov/show/NCT02254967	A Phase IIIB/IV Study to Compare the Efficacy of Vancomycin Therapy to Extended Duration of Fidaxomicin Therapy in the Clinical Cure of Clostridium Difficile Infection (CDI) in an Older Population	acute	500	5000	125	mg	qid	10	antibiotic	vancomycin	no	179	therapeutic	all	adult,olderadult	phase4	vancomycin		147	0.821229
https://ClinicalTrials.gov/show/NCT02254967	A Phase IIIB/IV Study to Compare the Efficacy of Vancomycin Therapy to Extended Duration of Fidaxomicin Therapy in the Clinical Cure of Clostridium Difficile Infection (CDI) in an Older Population	sustained	500	5000	125	mg	qid	10	antibiotic	vancomycin	no	179	therapeutic	all	adult,olderadult	phase4	vancomycin		106	0.592179
https://ClinicalTrials.gov/show/NCT01597505	Study of CB-183,315 in Participants With Clostridium Difficile Associated Diarrhea (MK-4261-005)	acute	500	5000	125	mg	qid	10	antibiotic	vancomycin	no	280	therapeutic	all	adult,olderadult	phase3	vancomycin		234.08	0.835714
https://ClinicalTrials.gov/show/NCT01597505	Study of CB-183,315 in Participants With Clostridium Difficile Associated Diarrhea (MK-4261-005)	sustained	500	5000	125	mg	qid	10	antibiotic	vancomycin	no	280	therapeutic	all	adult,olderadult	phase3	vancomycin		171.92	0.610714
https://ClinicalTrials.gov/show/NCT01598311	A Study of CB-183,315 in Participants With Clostridium Difficile Associated Diarrhea (MK-4261-006)	acute	500	5000	125	mg	qid	10	antibiotic	vancomycin	no	292	therapeutic	all	adult,olderadult	phase3	vancomycin		239.732	0.818493
https://ClinicalTrials.gov/show/NCT01598311	A Study of CB-183,315 in Participants With Clostridium Difficile Associated Diarrhea (MK-4261-006)	sustained	500	5000	125	mg	qid	10	antibiotic	vancomycin	no	292	therapeutic	all	adult,olderadult	phase3	vancomycin		172.28	0.589041
https://ClinicalTrials.gov/show/NCT02179658	A Study to Compare Safety and Efficacy of OPT-80(Fidaxomicin) With Vancomycin in Subjects With Clostridium Difficile-associated Diarrhea (CDAD)	acute	500	5000	125	mg	qid	10	antibiotic	vancomycin	no	108	therapeutic	all	adult,olderadult	phase3	vancomycin		95	0.87963
https://ClinicalTrials.gov/show/NCT02179658	A Study to Compare Safety and Efficacy of OPT-80(Fidaxomicin) With Vancomycin in Subjects With Clostridium Difficile-associated Diarrhea (CDAD)	sustained	500	5000	125	mg	qid	10	antibiotic	vancomycin	no	108	therapeutic	all	adult,olderadult	phase3	vancomycin		71	0.657407
https://ClinicalTrials.gov/show/NCT02743234	Fecal Microbiota Transplantation for Relapsing Clostridium Difficile Infection	acute	500	5000	125	mg	qid	10	antibiotic	vancomycin	no	16	therapeutic	all	adult,olderadult	phase3	vancomycin		3	0.1875
https://ClinicalTrials.gov/show/NCT02743234	Fecal Microbiota Transplantation for Relapsing Clostridium Difficile Infection	sustained	500	5000	125	mg	qid	10	antibiotic	vancomycin	no	16	therapeutic	all	adult,olderadult	phase3	vancomycin		5	0.3125
https://ClinicalTrials.gov/show/NCT01222702	Efficacy, Safety and Tolerability of Cadazolid in Subjects With Clostridium Difficile Associated Diarrhea (CDAD)	acute	500	5000	125	mg	qid	10	antibiotic	vancomycin	yes	22	therapeutic	all	adult,olderadult	phase2	vancomycin		19	0.863636
https://ClinicalTrials.gov/show/NCT01222702	Efficacy, Safety and Tolerability of Cadazolid in Subjects With Clostridium Difficile Associated Diarrhea (CDAD)	sustained	500	5000	125	mg	qid	10	antibiotic	vancomycin	yes	22	therapeutic	all	adult,olderadult	phase2	vancomycin		12	0.545455
https://ClinicalTrials.gov/show/NCT02218372	A Study to Investigate the Safety and Efficacy of Fidaxomicin (Oral Suspension or Tablets) and Vancomycin (Oral Liquid or Capsules) in Pediatric Subjects With Clostridium Difficile-associated Diarrhea (CDAD)	acute	500	5000	125	mg	qid	10	antibiotic	vancomycin	no	44	therapeutic	all	child	phase3	vancomycin		31.02	0.704545
https://ClinicalTrials.gov/show/NCT02218372	A Study to Investigate the Safety and Efficacy of Fidaxomicin (Oral Suspension or Tablets) and Vancomycin (Oral Liquid or Capsules) in Pediatric Subjects With Clostridium Difficile-associated Diarrhea (CDAD)	sustained	500	5000	125	mg	qid	10	antibiotic	vancomycin	no	31	therapeutic	all	child	phase3	vancomycin		23.994	0.741935
https://ClinicalTrials.gov/show/NCT00468728	PAR-101/OPT-80 Versus Vancomycin for the Treatment of Clostridium Difficile-Associated Diarrhea (CDAD)	acute	500	5000	125	mg	qid	10	antibiotic	vancomycin	no	256	therapeutic	all	child,adult,olderadult	phase3	vancomycin		221.952	0.863281
https://ClinicalTrials.gov/show/NCT00468728	PAR-101/OPT-80 Versus Vancomycin for the Treatment of Clostridium Difficile-Associated Diarrhea (CDAD)	sustained	500	5000	125	mg	qid	10	antibiotic	vancomycin	no	222	therapeutic	all	child,adult,olderadult	phase3	vancomycin		173.16	0.779279
https://ClinicalTrials.gov/show/NCT00314951	Fidaxomicin Versus Vancomycin for the Treatment of Clostridium Difficile-Associated Diarrhea (CDAD) (MK-5119-018)	acute	500	5000	125	mg	qid	10	antibiotic	vancomycin	no	307	therapeutic	all	child,adult,olderadult	phase3	vancomycin		263.099	0.856678
https://ClinicalTrials.gov/show/NCT00314951	Fidaxomicin Versus Vancomycin for the Treatment of Clostridium Difficile-Associated Diarrhea (CDAD) (MK-5119-018)	sustained	500	5000	125	mg	qid	10	antibiotic	vancomycin	no	263	therapeutic	all	child,adult,olderadult	phase3	vancomycin		196.987	0.745247
https://ClinicalTrials.gov/show/NCT00269399	A Trial to Compare Xifaxan to Vancomycin for the Treatment of Clostridium Difficile-Associated Diarrhea (CDAD)	acute	500	5000	125	mg	qid	10	antibiotic	vancomycin	no	115	therapeutic	all	adult,olderadult	phase3	vancomycin		73	0.634783
https://ClinicalTrials.gov/show/NCT00269399	A Trial to Compare Xifaxan to Vancomycin for the Treatment of Clostridium Difficile-Associated Diarrhea (CDAD)	sustained	500	5000	125	mg	qid	10	antibiotic	vancomycin	no	73	therapeutic	all	adult,olderadult	phase3	vancomycin		63	0.863014
https://ClinicalTrials.gov/show/NCT00196794	A Study of GT267-004 Versus Vancomycin and GT267-004 Versus Metronidazole in Patients With C. Difficile-Associated Diarrhea	acute	500	5000	125	mg	qid	10	antibiotic	vancomycin	no	125	therapeutic	all	adult,olderadult	phase3	vancomycin		101	0.808
https://ClinicalTrials.gov/show/NCT00196794	A Study of GT267-004 Versus Vancomycin and GT267-004 Versus Metronidazole in Patients With C. Difficile-Associated Diarrhea	sustained	500	5000	125	mg	qid	10	antibiotic	vancomycin	no	102	therapeutic	all	adult,olderadult	phase3	vancomycin		84.048	0.823529
https://ClinicalTrials.gov/show/NCT00106509	A Study of GT267-004 Versus Vancomycin and GT267-004 Versus Metronidazole in Patients With C.Difficile - Associated Diarrhea	acute	500	5000	125	mg	qid	10	antibiotic	vancomycin	no	134	therapeutic	all	adult,olderadult	phase3	vancomycin		108.942	0.80597
https://ClinicalTrials.gov/show/NCT00106509	A Study of GT267-004 Versus Vancomycin and GT267-004 Versus Metronidazole in Patients With C.Difficile - Associated Diarrhea	sustained	500	5000	125	mg	qid	10	antibiotic	vancomycin	no	107	therapeutic	all	adult,olderadult	phase3	vancomycin		81.962	0.757009
https://ClinicalTrials.gov/show/NCT02092935	A Study of SMT19969 Compared With Vancomycin for the Treatment of Clostridium Difficile-Associated Diarrhoea (CDAD)	acute	500	5000	125	mg	qid	10	antibiotic	vancomycin	no	33	therapeutic	all	adult,olderadult	phase2	vancomycin		23	0.69697
https://ClinicalTrials.gov/show/NCT02092935	A Study of SMT19969 Compared With Vancomycin for the Treatment of Clostridium Difficile-Associated Diarrhoea (CDAD)	sustained	500	5000	125	mg	qid	10	antibiotic	vancomycin	no	23	therapeutic	all	adult,olderadult	phase2	vancomycin		14	0.608696
https://ClinicalTrials.gov/show/NCT01818141	Study to Assess Inhibition of Spore Production in Patients With C. Difficile Infections: Fidaxomicin Versus Vancomycin	acute	500	5000	125	mg	qid	10	antibiotic	vancomycin125mgbymouthevery6hoursfor10days	no	9	therapeutic	all	adult,olderadult	phase4	vancomycin		6	0.666667
https://ClinicalTrials.gov/show/NCT01818141	Study to Assess Inhibition of Spore Production in Patients With C. Difficile Infections: Fidaxomicin Versus Vancomycin	acute	500	5000	125	mg	qid	10	antibiotic	vancomycin125mgbymouthevery6hoursfor10days	no	5	therapeutic	all	adult,olderadult	phase4	vancomycin		5	1
https://ClinicalTrials.gov/show/NCT01259726	Safety and Efficacy Study of VP20621 for Prevention of Recurrent Clostridium Difficile Infection	sustained	10000	70000	10000	spores	qd	7	probiotic	vp20621	yes	41	therapeutic	all	adult,olderadult	phase2	M3, a NTCD strain	Z31, a NTCD strain;NTCD-035;PCD130 + 027;PCD182 + 027;Strain 630;Clostridium difficile CD37;T7, a NTCD strain	35	0.853659
https://ClinicalTrials.gov/show/NCT01259726	Safety and Efficacy Study of VP20621 for Prevention of Recurrent Clostridium Difficile Infection	sustained	10000000	70000000	10000000	spores	qd	7	probiotic	vp20621	yes	43	therapeutic	all	adult,olderadult	phase2	M3, a NTCD strain	Z31, a NTCD strain;NTCD-035;PCD130 + 027;PCD182 + 027;Strain 630;Clostridium difficile CD37;T7, a NTCD strain	41	0.953488
https://ClinicalTrials.gov/show/NCT01259726	Safety and Efficacy Study of VP20621 for Prevention of Recurrent Clostridium Difficile Infection	sustained	10000000	140000000	10000000	spores	qd	14	probiotic	vp20621	yes	41	therapeutic	all	adult,olderadult	phase2	M3, a NTCD strain	Z31, a NTCD strain;NTCD-035;PCD130 + 027;PCD182 + 027;Strain 630;Clostridium difficile CD37;T7, a NTCD strain	35	0.853659
