# Supplementary material for: Predicting clinical trial success for Clostridium difficile infections based on preclinical data
Source: Front Artif Intell. 2024 Oct 9;7:1487335. doi: 10.3389/frai.2024.1487335 (PMC11496251; doi:10.3389/frai.2024.1487335)
Supplement: Supplementary file 2 [file Data_Sheet_2.XLSX]

## Sheet: README
Sheet	Column	Preclinical or Clinical	Description
Paired	Link preclinical	Preclinical	Link to the preclinical trial publication.
	Year preclinical	Preclinical	Year of the preclinical trial publication.
	acute/sustained preclinical	Preclinical	Timepoint at which the effect of drug being studied was measured.
	gnotobiotic preclinical	Preclinical	Microbial status of experimental animal samples. SPF (specific pathogen-Free) or axenic.
	animal strain preclinical	Preclinical	Strain of the animal.
	animal sex preclinical	Preclinical	Gender of the animal.
	animal age value (days) preclinical	Preclinical	Age of the animal in days.
	animal weight value (g) preclinical	Preclinical	Weight of the animal in grams.
	species preclinical	Preclinical	Species of the animal.
	mechanism_of_action preclinical	Preclinical	Mechanism of action of the intervention drug.
	disease model preclinical	Preclinical	Disease model used by the preclinical trial. Challenge refers to the induction of C. difficile in the experimental subjects.
	success measure preclinical	Preclinical	Measure of success. Either mortality or survival is recorded in this dataset.
	tested dose dependently preclinical	Preclinical	Whether if the dosage of the drug was tested dependently.
	prophylactic / therapeutic preclinical	Preclinical	Prophylactic drugs are designed to prevent the occurrence of a disease, while therapeutic drugs focus on treating a disease that has already occurred.
	ribotype preclinical	Preclinical	Ribotype of C. difficile.
	c diff strain preclinical	Preclinical	Strain of C. difficile.
	c diff dose value preclinical	Preclinical	Dosage value of C. difficile.
	c diff dose units preclinical	Preclinical	Dosage unit of C. difficile.
	c diff dose vegetative/spores preclinical	Preclinical	Form of C. difficile.
	daily dosage preclinical	Preclinical	Dosage of drug per day.
	total dosage preclinical	Preclinical	Total dosage of drug throughout the period of study.
	dosage value preclinical	Preclinical	Dosage of drug per each time.
	dosage units preclinical	Preclinical	Unit of drug dosage.
	dosage times per day preclinical	Preclinical	How many times the drug was given each day.
	dosage duration preclinical	Preclinical	How many days the drug was given.
	intervention preclinical	Preclinical	Drug tested.
	result preclinical	Preclinical	Survival rate of the samples in this arm. (outcome count / sample group size)
	acute/sustained clinical	Clinical	Timepoint at which the effect of drug being studied was measured.
	daily dosage clinical	Clinical	Dosage of drug per day.
	total dosage clinical	Clinical	Total dosage of drug throughout the period of study.
	dosage value clinical	Clinical	Dosage of drug per each time.
	dosage units clinical	Clinical	Unit of drug dosage.
	dosage times per day clinical	Clinical	How many times the drug was given each day.
	dosage duration clinical	Clinical	How many days the drug was given.
	intervention class clinical	Clinical	Category of the intervention drug.
	intervention clinical	Clinical	Drug tested.
	dose dependence clinical	Clinical	Whether if the dosage of the drug was tested dependently.
	prophylactic / therapeutic clinical	Clinical	Prophylactic drugs are designed to prevent the occurrence of a disease, while therapeutic drugs focus on treating a disease that has already occurred.
	Gender clinical	Clinical	Gender of the samples.
	Age Groups clinical	Clinical	Age Groups of the samples.
	Phases clinical	Clinical	Clinical trial phase.
	result clinical	Clinical	Recovery rate of the samples in this arm. (outcome count / sample group size)

## Sheet: Paired
Link preclinical	Year preclinical	acute/sustained preclinical	gnotobiotic preclinical	animal strain preclinical	animal sex preclinical	animal age value (days) preclinical	animal weight value (g) preclinical	species preclinical	mechanism_of_action preclinical	disease model preclinical	success measure preclinical	tested dose dependently preclinical	prophylactic / therapeutic preclinical	ribotype preclinical	c diff strain preclinical	c diff dose value preclinical	c diff dose units preclinical	c diff dose vegetative/spores preclinical	daily dosage preclinical	total dosage preclinical	dosage value preclinical	dosage units preclinical	dosage times per day preclinical	dosage duration preclinical	intervention preclinical	result preclinical	acute/sustained clinical	daily dosage clinical	total dosage clinical	dosage value clinical	dosage units clinical	dosage times per day clinical	dosage duration clinical	intervention class clinical	intervention clinical	dose dependence clinical	prophylactic / therapeutic clinical	Gender clinical	Age Groups clinical	Phases clinical	result clinical
https://pubmed.ncbi.nlm.nih.gov/77366	1978	acute	n/a	goldensyrian	n/a	42		hamster		challenge	deathfromenterocolitis	f	p		na	13	cfu		3		3	mg/ml		7	vancomycin	0	acute	500	5000	125	mg	qid	10	antibiotic	vancomycin	yes	therapeutic	all	adult,olderadult	phase2	0.893939
https://pubmed.ncbi.nlm.nih.gov/77366	1978	acute	n/a	goldensyrian	n/a	42		hamster		challenge	deathfromenterocolitis	f	p		na	13	cfu		3		3	mg/ml		7	vancomycin	0	sustained	500	5000	125	mg	qid	10	antibiotic	vancomycin	yes	therapeutic	all	adult,olderadult	phase2	0.644068
https://pubmed.ncbi.nlm.nih.gov/77366	1978	acute	n/a	goldensyrian	n/a	42		hamster		challenge	deathfromenterocolitis	f	p		na	13	cfu		3		3	mg/ml		7	vancomycin	0	sustained	125		125	mg	qd		antibiotic	vancomycin	no	prophylactic	all	olderadult	phase4	1
https://pubmed.ncbi.nlm.nih.gov/77366	1978	acute	n/a	goldensyrian	n/a	42		hamster		challenge	deathfromenterocolitis	f	p		na	13	cfu		3		3	mg/ml		7	vancomycin	0	acute	500	5000	125	mg	qid	10	antibiotic	vancomycin	no	therapeutic	all	adult,olderadult	phase3	0.853821
https://pubmed.ncbi.nlm.nih.gov/77366	1978	acute	n/a	goldensyrian	n/a	42		hamster		challenge	deathfromenterocolitis	f	p		na	13	cfu		3		3	mg/ml		7	vancomycin	0	sustained	500	5000	125	mg	qid	10	antibiotic	vancomycin	no	therapeutic	all	adult,olderadult	phase3	0.61794
https://pubmed.ncbi.nlm.nih.gov/77366	1978	acute	n/a	goldensyrian	n/a	42		hamster		challenge	deathfromenterocolitis	f	p		na	13	cfu		3		3	mg/ml		7	vancomycin	0	acute	500	5000	125	mg	qid	10	antibiotic	vancomycin	no	therapeutic	all	adult,olderadult	phase3	0.849057
https://pubmed.ncbi.nlm.nih.gov/77366	1978	acute	n/a	goldensyrian	n/a	42		hamster		challenge	deathfromenterocolitis	f	p		na	13	cfu		3		3	mg/ml		7	vancomycin	0	sustained	500	5000	125	mg	qid	10	antibiotic	vancomycin	no	therapeutic	all	adult,olderadult	phase3	0.622642
https://pubmed.ncbi.nlm.nih.gov/77366	1978	acute	n/a	goldensyrian	n/a	42		hamster		challenge	deathfromenterocolitis	f	p		na	13	cfu		3		3	mg/ml		7	vancomycin	0	acute	500	5000	125	mg	qid	10	antibiotic	vancomycin	no	therapeutic	all	adult,olderadult	phase4	0.821229
https://pubmed.ncbi.nlm.nih.gov/77366	1978	acute	n/a	goldensyrian	n/a	42		hamster		challenge	deathfromenterocolitis	f	p		na	13	cfu		3		3	mg/ml		7	vancomycin	0	sustained	500	5000	125	mg	qid	10	antibiotic	vancomycin	no	therapeutic	all	adult,olderadult	phase4	0.592179
https://pubmed.ncbi.nlm.nih.gov/77366	1978	acute	n/a	goldensyrian	n/a	42		hamster		challenge	deathfromenterocolitis	f	p		na	13	cfu		3		3	mg/ml		7	vancomycin	0	acute	500	5000	125	mg	qid	10	antibiotic	vancomycin	no	therapeutic	all	adult,olderadult	phase3	0.835714
https://pubmed.ncbi.nlm.nih.gov/77366	1978	acute	n/a	goldensyrian	n/a	42		hamster		challenge	deathfromenterocolitis	f	p		na	13	cfu		3		3	mg/ml		7	vancomycin	0	sustained	500	5000	125	mg	qid	10	antibiotic	vancomycin	no	therapeutic	all	adult,olderadult	phase3	0.610714
https://pubmed.ncbi.nlm.nih.gov/77366	1978	acute	n/a	goldensyrian	n/a	42		hamster		challenge	deathfromenterocolitis	f	p		na	13	cfu		3		3	mg/ml		7	vancomycin	0	acute	500	5000	125	mg	qid	10	antibiotic	vancomycin	no	therapeutic	all	adult,olderadult	phase3	0.818493
https://pubmed.ncbi.nlm.nih.gov/77366	1978	acute	n/a	goldensyrian	n/a	42		hamster		challenge	deathfromenterocolitis	f	p		na	13	cfu		3		3	mg/ml		7	vancomycin	0	sustained	500	5000	125	mg	qid	10	antibiotic	vancomycin	no	therapeutic	all	adult,olderadult	phase3	0.589041
https://pubmed.ncbi.nlm.nih.gov/77366	1978	acute	n/a	goldensyrian	n/a	42		hamster		challenge	deathfromenterocolitis	f	p		na	13	cfu		3		3	mg/ml		7	vancomycin	0	acute	500	5000	125	mg	qid	10	antibiotic	vancomycin	no	therapeutic	all	adult,olderadult	phase3	0.87963
https://pubmed.ncbi.nlm.nih.gov/77366	1978	acute	n/a	goldensyrian	n/a	42		hamster		challenge	deathfromenterocolitis	f	p		na	13	cfu		3		3	mg/ml		7	vancomycin	0	sustained	500	5000	125	mg	qid	10	antibiotic	vancomycin	no	therapeutic	all	adult,olderadult	phase3	0.657407
https://pubmed.ncbi.nlm.nih.gov/77366	1978	acute	n/a	goldensyrian	n/a	42		hamster		challenge	deathfromenterocolitis	f	p		na	13	cfu		3		3	mg/ml		7	vancomycin	0	acute	500	5000	125	mg	qid	10	antibiotic	vancomycin	no	therapeutic	all	adult,olderadult	phase3	0.1875
https://pubmed.ncbi.nlm.nih.gov/77366	1978	acute	n/a	goldensyrian	n/a	42		hamster		challenge	deathfromenterocolitis	f	p		na	13	cfu		3		3	mg/ml		7	vancomycin	0	sustained	500	5000	125	mg	qid	10	antibiotic	vancomycin	no	therapeutic	all	adult,olderadult	phase3	0.3125
https://pubmed.ncbi.nlm.nih.gov/77366	1978	acute	n/a	goldensyrian	n/a	42		hamster		challenge	deathfromenterocolitis	f	p		na	13	cfu		3		3	mg/ml		7	vancomycin	0	acute	500	5000	125	mg	qid	10	antibiotic	vancomycin	yes	therapeutic	all	adult,olderadult	phase2	0.863636
https://pubmed.ncbi.nlm.nih.gov/77366	1978	acute	n/a	goldensyrian	n/a	42		hamster		challenge	deathfromenterocolitis	f	p		na	13	cfu		3		3	mg/ml		7	vancomycin	0	sustained	500	5000	125	mg	qid	10	antibiotic	vancomycin	yes	therapeutic	all	adult,olderadult	phase2	0.545455
https://pubmed.ncbi.nlm.nih.gov/77366	1978	acute	n/a	goldensyrian	n/a	42		hamster		challenge	deathfromenterocolitis	f	p		na	13	cfu		3		3	mg/ml		7	vancomycin	0	acute	500	5000	125	mg	qid	10	antibiotic	vancomycin	no	therapeutic	all	child	phase3	0.704545
https://pubmed.ncbi.nlm.nih.gov/77366	1978	acute	n/a	goldensyrian	n/a	42		hamster		challenge	deathfromenterocolitis	f	p		na	13	cfu		3		3	mg/ml		7	vancomycin	0	sustained	500	5000	125	mg	qid	10	antibiotic	vancomycin	no	therapeutic	all	child	phase3	0.741935
https://pubmed.ncbi.nlm.nih.gov/77366	1978	acute	n/a	goldensyrian	n/a	42		hamster		challenge	deathfromenterocolitis	f	p		na	13	cfu		3		3	mg/ml		7	vancomycin	0	acute	500	5000	125	mg	qid	10	antibiotic	vancomycin	no	therapeutic	all	child,adult,olderadult	phase3	0.863281
https://pubmed.ncbi.nlm.nih.gov/77366	1978	acute	n/a	goldensyrian	n/a	42		hamster		challenge	deathfromenterocolitis	f	p		na	13	cfu		3		3	mg/ml		7	vancomycin	0	sustained	500	5000	125	mg	qid	10	antibiotic	vancomycin	no	therapeutic	all	child,adult,olderadult	phase3	0.779279
https://pubmed.ncbi.nlm.nih.gov/77366	1978	acute	n/a	goldensyrian	n/a	42		hamster		challenge	deathfromenterocolitis	f	p		na	13	cfu		3		3	mg/ml		7	vancomycin	0	acute	500	5000	125	mg	qid	10	antibiotic	vancomycin	no	therapeutic	all	child,adult,olderadult	phase3	0.856678
https://pubmed.ncbi.nlm.nih.gov/77366	1978	acute	n/a	goldensyrian	n/a	42		hamster		challenge	deathfromenterocolitis	f	p		na	13	cfu		3		3	mg/ml		7	vancomycin	0	sustained	500	5000	125	mg	qid	10	antibiotic	vancomycin	no	therapeutic	all	child,adult,olderadult	phase3	0.745247
https://pubmed.ncbi.nlm.nih.gov/77366	1978	acute	n/a	goldensyrian	n/a	42		hamster		challenge	deathfromenterocolitis	f	p		na	13	cfu		3		3	mg/ml		7	vancomycin	0	acute	500	5000	125	mg	qid	10	antibiotic	vancomycin	no	therapeutic	all	adult,olderadult	phase3	0.634783
https://pubmed.ncbi.nlm.nih.gov/77366	1978	acute	n/a	goldensyrian	n/a	42		hamster		challenge	deathfromenterocolitis	f	p		na	13	cfu		3		3	mg/ml		7	vancomycin	0	sustained	500	5000	125	mg	qid	10	antibiotic	vancomycin	no	therapeutic	all	adult,olderadult	phase3	0.863014
https://pubmed.ncbi.nlm.nih.gov/77366	1978	acute	n/a	goldensyrian	n/a	42		hamster		challenge	deathfromenterocolitis	f	p		na	13	cfu		3		3	mg/ml		7	vancomycin	0	acute	500	5000	125	mg	qid	10	antibiotic	vancomycin	no	therapeutic	all	adult,olderadult	phase3	0.808
https://pubmed.ncbi.nlm.nih.gov/77366	1978	acute	n/a	goldensyrian	n/a	42		hamster		challenge	deathfromenterocolitis	f	p		na	13	cfu		3		3	mg/ml		7	vancomycin	0	sustained	500	5000	125	mg	qid	10	antibiotic	vancomycin	no	therapeutic	all	adult,olderadult	phase3	0.823529
https://pubmed.ncbi.nlm.nih.gov/77366	1978	acute	n/a	goldensyrian	n/a	42		hamster		challenge	deathfromenterocolitis	f	p		na	13	cfu		3		3	mg/ml		7	vancomycin	0	acute	500	5000	125	mg	qid	10	antibiotic	vancomycin	no	therapeutic	all	adult,olderadult	phase3	0.80597
https://pubmed.ncbi.nlm.nih.gov/77366	1978	acute	n/a	goldensyrian	n/a	42		hamster		challenge	deathfromenterocolitis	f	p		na	13	cfu		3		3	mg/ml		7	vancomycin	0	sustained	500	5000	125	mg	qid	10	antibiotic	vancomycin	no	therapeutic	all	adult,olderadult	phase3	0.757009
https://pubmed.ncbi.nlm.nih.gov/77366	1978	acute	n/a	goldensyrian	n/a	42		hamster		challenge	deathfromenterocolitis	f	p		na	13	cfu		3		3	mg/ml		7	vancomycin	0	acute	500	5000	125	mg	qid	10	antibiotic	vancomycin	no	therapeutic	all	adult,olderadult	phase2	0.69697
https://pubmed.ncbi.nlm.nih.gov/77366	1978	acute	n/a	goldensyrian	n/a	42		hamster		challenge	deathfromenterocolitis	f	p		na	13	cfu		3		3	mg/ml		7	vancomycin	0	sustained	500	5000	125	mg	qid	10	antibiotic	vancomycin	no	therapeutic	all	adult,olderadult	phase2	0.608696
https://pubmed.ncbi.nlm.nih.gov/77366	1978	acute	n/a	goldensyrian	n/a	42		hamster		challenge	deathfromenterocolitis	f	p		na	13	cfu		3		3	mg/ml		7	vancomycin	0	acute	500	5000	125	mg	qid	10	antibiotic	vancomycin	no	therapeutic	all	adult,olderadult	phase4	0.666667
https://pubmed.ncbi.nlm.nih.gov/77366	1978	acute	n/a	goldensyrian	n/a	42		hamster		challenge	deathfromenterocolitis	f	p		na	13	cfu		3		3	mg/ml		7	vancomycin	0	acute	500	5000	125	mg	qid	10	antibiotic	vancomycin	no	therapeutic	all	adult,olderadult	phase4	1
https://pubmed.ncbi.nlm.nih.gov/77366	1978	acute	n/a	goldensyrian	n/a	42		hamster		challenge	deathfromenterocolitis	f	p		na	13	cfu		3		3	mg/ml		7	vancomycin	0	sustained							control	vancomycin	no	therapeutic	all	adult,olderadult	phase3	0.740741
https://pubmed.ncbi.nlm.nih.gov/77366	1978	acute	n/a	goldensyrian	n/a	42		hamster		challenge	deathfromenterocolitis	f	p		na	13	cfu		3		3	mg/ml		7	vancomycin	0	sustained							antibiotic	vancomycin	no	therapeutic	all	adult,olderadult	phase3	0.721519
https://pubmed.ncbi.nlm.nih.gov/77366	1978	acute	n/a	goldensyrian	n/a	42		hamster		challenge	deathfromenterocolitis	f	p		na	13	cfu		3		3	mg/ml		7	vancomycin	0	sustained							antibiotic	vancomycin	no	therapeutic	all	adult,olderadult	phase2	0.263158
https://pubmed.ncbi.nlm.nih.gov/77366	1978	acute	n/a	goldensyrian	n/a	42		hamster		challenge	deathfromenterocolitis	f	p		na	13	cfu		3		3	mg/ml		7	vancomycin	0	acute							antibiotic	vancomycin	no	therapeutic	all	adult,olderadult	phase2	0.306667
https://pubmed.ncbi.nlm.nih.gov/77366	1978	acute	n/a	goldensyrian	n/a	42		hamster		challenge	deathfromenterocolitis	f	p		na	13	cfu		3		3	mg/ml		7	vancomycin	0	sustained							antibiotic	vancomycin	no	therapeutic	all	adult,olderadult	phase2	0.306667
https://pubmed.ncbi.nlm.nih.gov/26917573	2016	acute	n/a	c57bl/6	m	504		mouse		vancomycin,colistin,gentamicin,metronidazole+clindamycin+challenge	cumulativemortality	f	t	87	vpi10463	100000			50	250	50	mg/kg	qd	5	vancomycin	1	acute	500	5000	125	mg	qid	10	antibiotic	vancomycin	yes	therapeutic	all	adult,olderadult	phase2	0.893939
https://pubmed.ncbi.nlm.nih.gov/26917573	2016	acute	n/a	c57bl/6	m	504		mouse		vancomycin,colistin,gentamicin,metronidazole+clindamycin+challenge	cumulativemortality	f	t	87	vpi10463	100000			50	250	50	mg/kg	qd	5	vancomycin	1	sustained	500	5000	125	mg	qid	10	antibiotic	vancomycin	yes	therapeutic	all	adult,olderadult	phase2	0.644068
https://pubmed.ncbi.nlm.nih.gov/26917573	2016	acute	n/a	c57bl/6	m	504		mouse		vancomycin,colistin,gentamicin,metronidazole+clindamycin+challenge	cumulativemortality	f	t	87	vpi10463	100000			50	250	50	mg/kg	qd	5	vancomycin	1	sustained	125		125	mg	qd		antibiotic	vancomycin	no	prophylactic	all	olderadult	phase4	1
https://pubmed.ncbi.nlm.nih.gov/26917573	2016	acute	n/a	c57bl/6	m	504		mouse		vancomycin,colistin,gentamicin,metronidazole+clindamycin+challenge	cumulativemortality	f	t	87	vpi10463	100000			50	250	50	mg/kg	qd	5	vancomycin	1	acute	500	5000	125	mg	qid	10	antibiotic	vancomycin	no	therapeutic	all	adult,olderadult	phase3	0.853821
https://pubmed.ncbi.nlm.nih.gov/26917573	2016	acute	n/a	c57bl/6	m	504		mouse		vancomycin,colistin,gentamicin,metronidazole+clindamycin+challenge	cumulativemortality	f	t	87	vpi10463	100000			50	250	50	mg/kg	qd	5	vancomycin	1	sustained	500	5000	125	mg	qid	10	antibiotic	vancomycin	no	therapeutic	all	adult,olderadult	phase3	0.61794
https://pubmed.ncbi.nlm.nih.gov/26917573	2016	acute	n/a	c57bl/6	m	504		mouse		vancomycin,colistin,gentamicin,metronidazole+clindamycin+challenge	cumulativemortality	f	t	87	vpi10463	100000			50	250	50	mg/kg	qd	5	vancomycin	1	acute	500	5000	125	mg	qid	10	antibiotic	vancomycin	no	therapeutic	all	adult,olderadult	phase3	0.849057
https://pubmed.ncbi.nlm.nih.gov/26917573	2016	acute	n/a	c57bl/6	m	504		mouse		vancomycin,colistin,gentamicin,metronidazole+clindamycin+challenge	cumulativemortality	f	t	87	vpi10463	100000			50	250	50	mg/kg	qd	5	vancomycin	1	sustained	500	5000	125	mg	qid	10	antibiotic	vancomycin	no	therapeutic	all	adult,olderadult	phase3	0.622642
https://pubmed.ncbi.nlm.nih.gov/26917573	2016	acute	n/a	c57bl/6	m	504		mouse		vancomycin,colistin,gentamicin,metronidazole+clindamycin+challenge	cumulativemortality	f	t	87	vpi10463	100000			50	250	50	mg/kg	qd	5	vancomycin	1	acute	500	5000	125	mg	qid	10	antibiotic	vancomycin	no	therapeutic	all	adult,olderadult	phase4	0.821229
https://pubmed.ncbi.nlm.nih.gov/26917573	2016	acute	n/a	c57bl/6	m	504		mouse		vancomycin,colistin,gentamicin,metronidazole+clindamycin+challenge	cumulativemortality	f	t	87	vpi10463	100000			50	250	50	mg/kg	qd	5	vancomycin	1	sustained	500	5000	125	mg	qid	10	antibiotic	vancomycin	no	therapeutic	all	adult,olderadult	phase4	0.592179
https://pubmed.ncbi.nlm.nih.gov/26917573	2016	acute	n/a	c57bl/6	m	504		mouse		vancomycin,colistin,gentamicin,metronidazole+clindamycin+challenge	cumulativemortality	f	t	87	vpi10463	100000			50	250	50	mg/kg	qd	5	vancomycin	1	acute	500	5000	125	mg	qid	10	antibiotic	vancomycin	no	therapeutic	all	adult,olderadult	phase3	0.835714
https://pubmed.ncbi.nlm.nih.gov/26917573	2016	acute	n/a	c57bl/6	m	504		mouse		vancomycin,colistin,gentamicin,metronidazole+clindamycin+challenge	cumulativemortality	f	t	87	vpi10463	100000			50	250	50	mg/kg	qd	5	vancomycin	1	sustained	500	5000	125	mg	qid	10	antibiotic	vancomycin	no	therapeutic	all	adult,olderadult	phase3	0.610714
https://pubmed.ncbi.nlm.nih.gov/26917573	2016	acute	n/a	c57bl/6	m	504		mouse		vancomycin,colistin,gentamicin,metronidazole+clindamycin+challenge	cumulativemortality	f	t	87	vpi10463	100000			50	250	50	mg/kg	qd	5	vancomycin	1	acute	500	5000	125	mg	qid	10	antibiotic	vancomycin	no	therapeutic	all	adult,olderadult	phase3	0.818493
https://pubmed.ncbi.nlm.nih.gov/26917573	2016	acute	n/a	c57bl/6	m	504		mouse		vancomycin,colistin,gentamicin,metronidazole+clindamycin+challenge	cumulativemortality	f	t	87	vpi10463	100000			50	250	50	mg/kg	qd	5	vancomycin	1	sustained	500	5000	125	mg	qid	10	antibiotic	vancomycin	no	therapeutic	all	adult,olderadult	phase3	0.589041
https://pubmed.ncbi.nlm.nih.gov/26917573	2016	acute	n/a	c57bl/6	m	504		mouse		vancomycin,colistin,gentamicin,metronidazole+clindamycin+challenge	cumulativemortality	f	t	87	vpi10463	100000			50	250	50	mg/kg	qd	5	vancomycin	1	acute	500	5000	125	mg	qid	10	antibiotic	vancomycin	no	therapeutic	all	adult,olderadult	phase3	0.87963
https://pubmed.ncbi.nlm.nih.gov/26917573	2016	acute	n/a	c57bl/6	m	504		mouse		vancomycin,colistin,gentamicin,metronidazole+clindamycin+challenge	cumulativemortality	f	t	87	vpi10463	100000			50	250	50	mg/kg	qd	5	vancomycin	1	sustained	500	5000	125	mg	qid	10	antibiotic	vancomycin	no	therapeutic	all	adult,olderadult	phase3	0.657407
https://pubmed.ncbi.nlm.nih.gov/26917573	2016	acute	n/a	c57bl/6	m	504		mouse		vancomycin,colistin,gentamicin,metronidazole+clindamycin+challenge	cumulativemortality	f	t	87	vpi10463	100000			50	250	50	mg/kg	qd	5	vancomycin	1	acute	500	5000	125	mg	qid	10	antibiotic	vancomycin	no	therapeutic	all	adult,olderadult	phase3	0.1875
https://pubmed.ncbi.nlm.nih.gov/26917573	2016	acute	n/a	c57bl/6	m	504		mouse		vancomycin,colistin,gentamicin,metronidazole+clindamycin+challenge	cumulativemortality	f	t	87	vpi10463	100000			50	250	50	mg/kg	qd	5	vancomycin	1	sustained	500	5000	125	mg	qid	10	antibiotic	vancomycin	no	therapeutic	all	adult,olderadult	phase3	0.3125
https://pubmed.ncbi.nlm.nih.gov/26917573	2016	acute	n/a	c57bl/6	m	504		mouse		vancomycin,colistin,gentamicin,metronidazole+clindamycin+challenge	cumulativemortality	f	t	87	vpi10463	100000			50	250	50	mg/kg	qd	5	vancomycin	1	acute	500	5000	125	mg	qid	10	antibiotic	vancomycin	yes	therapeutic	all	adult,olderadult	phase2	0.863636
https://pubmed.ncbi.nlm.nih.gov/26917573	2016	acute	n/a	c57bl/6	m	504		mouse		vancomycin,colistin,gentamicin,metronidazole+clindamycin+challenge	cumulativemortality	f	t	87	vpi10463	100000			50	250	50	mg/kg	qd	5	vancomycin	1	sustained	500	5000	125	mg	qid	10	antibiotic	vancomycin	yes	therapeutic	all	adult,olderadult	phase2	0.545455
https://pubmed.ncbi.nlm.nih.gov/26917573	2016	acute	n/a	c57bl/6	m	504		mouse		vancomycin,colistin,gentamicin,metronidazole+clindamycin+challenge	cumulativemortality	f	t	87	vpi10463	100000			50	250	50	mg/kg	qd	5	vancomycin	1	acute	500	5000	125	mg	qid	10	antibiotic	vancomycin	no	therapeutic	all	child	phase3	0.704545
https://pubmed.ncbi.nlm.nih.gov/26917573	2016	acute	n/a	c57bl/6	m	504		mouse		vancomycin,colistin,gentamicin,metronidazole+clindamycin+challenge	cumulativemortality	f	t	87	vpi10463	100000			50	250	50	mg/kg	qd	5	vancomycin	1	sustained	500	5000	125	mg	qid	10	antibiotic	vancomycin	no	therapeutic	all	child	phase3	0.741935
https://pubmed.ncbi.nlm.nih.gov/26917573	2016	acute	n/a	c57bl/6	m	504		mouse		vancomycin,colistin,gentamicin,metronidazole+clindamycin+challenge	cumulativemortality	f	t	87	vpi10463	100000			50	250	50	mg/kg	qd	5	vancomycin	1	acute	500	5000	125	mg	qid	10	antibiotic	vancomycin	no	therapeutic	all	child,adult,olderadult	phase3	0.863281
https://pubmed.ncbi.nlm.nih.gov/26917573	2016	acute	n/a	c57bl/6	m	504		mouse		vancomycin,colistin,gentamicin,metronidazole+clindamycin+challenge	cumulativemortality	f	t	87	vpi10463	100000			50	250	50	mg/kg	qd	5	vancomycin	1	sustained	500	5000	125	mg	qid	10	antibiotic	vancomycin	no	therapeutic	all	child,adult,olderadult	phase3	0.779279
https://pubmed.ncbi.nlm.nih.gov/26917573	2016	acute	n/a	c57bl/6	m	504		mouse		vancomycin,colistin,gentamicin,metronidazole+clindamycin+challenge	cumulativemortality	f	t	87	vpi10463	100000			50	250	50	mg/kg	qd	5	vancomycin	1	acute	500	5000	125	mg	qid	10	antibiotic	vancomycin	no	therapeutic	all	child,adult,olderadult	phase3	0.856678
https://pubmed.ncbi.nlm.nih.gov/26917573	2016	acute	n/a	c57bl/6	m	504		mouse		vancomycin,colistin,gentamicin,metronidazole+clindamycin+challenge	cumulativemortality	f	t	87	vpi10463	100000			50	250	50	mg/kg	qd	5	vancomycin	1	sustained	500	5000	125	mg	qid	10	antibiotic	vancomycin	no	therapeutic	all	child,adult,olderadult	phase3	0.745247
https://pubmed.ncbi.nlm.nih.gov/26917573	2016	acute	n/a	c57bl/6	m	504		mouse		vancomycin,colistin,gentamicin,metronidazole+clindamycin+challenge	cumulativemortality	f	t	87	vpi10463	100000			50	250	50	mg/kg	qd	5	vancomycin	1	acute	500	5000	125	mg	qid	10	antibiotic	vancomycin	no	therapeutic	all	adult,olderadult	phase3	0.634783
https://pubmed.ncbi.nlm.nih.gov/26917573	2016	acute	n/a	c57bl/6	m	504		mouse		vancomycin,colistin,gentamicin,metronidazole+clindamycin+challenge	cumulativemortality	f	t	87	vpi10463	100000			50	250	50	mg/kg	qd	5	vancomycin	1	sustained	500	5000	125	mg	qid	10	antibiotic	vancomycin	no	therapeutic	all	adult,olderadult	phase3	0.863014
https://pubmed.ncbi.nlm.nih.gov/26917573	2016	acute	n/a	c57bl/6	m	504		mouse		vancomycin,colistin,gentamicin,metronidazole+clindamycin+challenge	cumulativemortality	f	t	87	vpi10463	100000			50	250	50	mg/kg	qd	5	vancomycin	1	acute	500	5000	125	mg	qid	10	antibiotic	vancomycin	no	therapeutic	all	adult,olderadult	phase3	0.808
https://pubmed.ncbi.nlm.nih.gov/26917573	2016	acute	n/a	c57bl/6	m	504		mouse		vancomycin,colistin,gentamicin,metronidazole+clindamycin+challenge	cumulativemortality	f	t	87	vpi10463	100000			50	250	50	mg/kg	qd	5	vancomycin	1	sustained	500	5000	125	mg	qid	10	antibiotic	vancomycin	no	therapeutic	all	adult,olderadult	phase3	0.823529
https://pubmed.ncbi.nlm.nih.gov/26917573	2016	acute	n/a	c57bl/6	m	504		mouse		vancomycin,colistin,gentamicin,metronidazole+clindamycin+challenge	cumulativemortality	f	t	87	vpi10463	100000			50	250	50	mg/kg	qd	5	vancomycin	1	acute	500	5000	125	mg	qid	10	antibiotic	vancomycin	no	therapeutic	all	adult,olderadult	phase3	0.80597
https://pubmed.ncbi.nlm.nih.gov/26917573	2016	acute	n/a	c57bl/6	m	504		mouse		vancomycin,colistin,gentamicin,metronidazole+clindamycin+challenge	cumulativemortality	f	t	87	vpi10463	100000			50	250	50	mg/kg	qd	5	vancomycin	1	sustained	500	5000	125	mg	qid	10	antibiotic	vancomycin	no	therapeutic	all	adult,olderadult	phase3	0.757009
https://pubmed.ncbi.nlm.nih.gov/26917573	2016	acute	n/a	c57bl/6	m	504		mouse		vancomycin,colistin,gentamicin,metronidazole+clindamycin+challenge	cumulativemortality	f	t	87	vpi10463	100000			50	250	50	mg/kg	qd	5	vancomycin	1	acute	500	5000	125	mg	qid	10	antibiotic	vancomycin	no	therapeutic	all	adult,olderadult	phase2	0.69697
https://pubmed.ncbi.nlm.nih.gov/26917573	2016	acute	n/a	c57bl/6	m	504		mouse		vancomycin,colistin,gentamicin,metronidazole+clindamycin+challenge	cumulativemortality	f	t	87	vpi10463	100000			50	250	50	mg/kg	qd	5	vancomycin	1	sustained	500	5000	125	mg	qid	10	antibiotic	vancomycin	no	therapeutic	all	adult,olderadult	phase2	0.608696
https://pubmed.ncbi.nlm.nih.gov/26917573	2016	acute	n/a	c57bl/6	m	504		mouse		vancomycin,colistin,gentamicin,metronidazole+clindamycin+challenge	cumulativemortality	f	t	87	vpi10463	100000			50	250	50	mg/kg	qd	5	vancomycin	1	acute	500	5000	125	mg	qid	10	antibiotic	vancomycin	no	therapeutic	all	adult,olderadult	phase4	0.666667
https://pubmed.ncbi.nlm.nih.gov/26917573	2016	acute	n/a	c57bl/6	m	504		mouse		vancomycin,colistin,gentamicin,metronidazole+clindamycin+challenge	cumulativemortality	f	t	87	vpi10463	100000			50	250	50	mg/kg	qd	5	vancomycin	1	acute	500	5000	125	mg	qid	10	antibiotic	vancomycin	no	therapeutic	all	adult,olderadult	phase4	1
https://pubmed.ncbi.nlm.nih.gov/26917573	2016	acute	n/a	c57bl/6	m	504		mouse		vancomycin,colistin,gentamicin,metronidazole+clindamycin+challenge	cumulativemortality	f	t	87	vpi10463	100000			50	250	50	mg/kg	qd	5	vancomycin	1	sustained							control	vancomycin	no	therapeutic	all	adult,olderadult	phase3	0.740741
https://pubmed.ncbi.nlm.nih.gov/26917573	2016	acute	n/a	c57bl/6	m	504		mouse		vancomycin,colistin,gentamicin,metronidazole+clindamycin+challenge	cumulativemortality	f	t	87	vpi10463	100000			50	250	50	mg/kg	qd	5	vancomycin	1	sustained							antibiotic	vancomycin	no	therapeutic	all	adult,olderadult	phase3	0.721519
https://pubmed.ncbi.nlm.nih.gov/26917573	2016	acute	n/a	c57bl/6	m	504		mouse		vancomycin,colistin,gentamicin,metronidazole+clindamycin+challenge	cumulativemortality	f	t	87	vpi10463	100000			50	250	50	mg/kg	qd	5	vancomycin	1	sustained							antibiotic	vancomycin	no	therapeutic	all	adult,olderadult	phase2	0.263158
https://pubmed.ncbi.nlm.nih.gov/26917573	2016	acute	n/a	c57bl/6	m	504		mouse		vancomycin,colistin,gentamicin,metronidazole+clindamycin+challenge	cumulativemortality	f	t	87	vpi10463	100000			50	250	50	mg/kg	qd	5	vancomycin	1	acute							antibiotic	vancomycin	no	therapeutic	all	adult,olderadult	phase2	0.306667
https://pubmed.ncbi.nlm.nih.gov/26917573	2016	acute	n/a	c57bl/6	m	504		mouse		vancomycin,colistin,gentamicin,metronidazole+clindamycin+challenge	cumulativemortality	f	t	87	vpi10463	100000			50	250	50	mg/kg	qd	5	vancomycin	1	sustained							antibiotic	vancomycin	no	therapeutic	all	adult,olderadult	phase2	0.306667
https://pubmed.ncbi.nlm.nih.gov/26917573	2016	sustained	n/a	c57bl/6	m	504		mouse		vancomycin,colistin,gentamicin,metronidazole+clindamycin+challenge	cumulativemortality	f	t	87	vpi10463	100000			50	250	50	mg/kg	qd	5	vancomycin	0.25	acute	500	5000	125	mg	qid	10	antibiotic	vancomycin	yes	therapeutic	all	adult,olderadult	phase2	0.893939
https://pubmed.ncbi.nlm.nih.gov/26917573	2016	sustained	n/a	c57bl/6	m	504		mouse		vancomycin,colistin,gentamicin,metronidazole+clindamycin+challenge	cumulativemortality	f	t	87	vpi10463	100000			50	250	50	mg/kg	qd	5	vancomycin	0.25	sustained	500	5000	125	mg	qid	10	antibiotic	vancomycin	yes	therapeutic	all	adult,olderadult	phase2	0.644068
https://pubmed.ncbi.nlm.nih.gov/26917573	2016	sustained	n/a	c57bl/6	m	504		mouse		vancomycin,colistin,gentamicin,metronidazole+clindamycin+challenge	cumulativemortality	f	t	87	vpi10463	100000			50	250	50	mg/kg	qd	5	vancomycin	0.25	sustained	125		125	mg	qd		antibiotic	vancomycin	no	prophylactic	all	olderadult	phase4	1
https://pubmed.ncbi.nlm.nih.gov/26917573	2016	sustained	n/a	c57bl/6	m	504		mouse		vancomycin,colistin,gentamicin,metronidazole+clindamycin+challenge	cumulativemortality	f	t	87	vpi10463	100000			50	250	50	mg/kg	qd	5	vancomycin	0.25	acute	500	5000	125	mg	qid	10	antibiotic	vancomycin	no	therapeutic	all	adult,olderadult	phase3	0.853821
https://pubmed.ncbi.nlm.nih.gov/26917573	2016	sustained	n/a	c57bl/6	m	504		mouse		vancomycin,colistin,gentamicin,metronidazole+clindamycin+challenge	cumulativemortality	f	t	87	vpi10463	100000			50	250	50	mg/kg	qd	5	vancomycin	0.25	sustained	500	5000	125	mg	qid	10	antibiotic	vancomycin	no	therapeutic	all	adult,olderadult	phase3	0.61794
https://pubmed.ncbi.nlm.nih.gov/26917573	2016	sustained	n/a	c57bl/6	m	504		mouse		vancomycin,colistin,gentamicin,metronidazole+clindamycin+challenge	cumulativemortality	f	t	87	vpi10463	100000			50	250	50	mg/kg	qd	5	vancomycin	0.25	acute	500	5000	125	mg	qid	10	antibiotic	vancomycin	no	therapeutic	all	adult,olderadult	phase3	0.849057
https://pubmed.ncbi.nlm.nih.gov/26917573	2016	sustained	n/a	c57bl/6	m	504		mouse		vancomycin,colistin,gentamicin,metronidazole+clindamycin+challenge	cumulativemortality	f	t	87	vpi10463	100000			50	250	50	mg/kg	qd	5	vancomycin	0.25	sustained	500	5000	125	mg	qid	10	antibiotic	vancomycin	no	therapeutic	all	adult,olderadult	phase3	0.622642
https://pubmed.ncbi.nlm.nih.gov/26917573	2016	sustained	n/a	c57bl/6	m	504		mouse		vancomycin,colistin,gentamicin,metronidazole+clindamycin+challenge	cumulativemortality	f	t	87	vpi10463	100000			50	250	50	mg/kg	qd	5	vancomycin	0.25	acute	500	5000	125	mg	qid	10	antibiotic	vancomycin	no	therapeutic	all	adult,olderadult	phase4	0.821229
https://pubmed.ncbi.nlm.nih.gov/26917573	2016	sustained	n/a	c57bl/6	m	504		mouse		vancomycin,colistin,gentamicin,metronidazole+clindamycin+challenge	cumulativemortality	f	t	87	vpi10463	100000			50	250	50	mg/kg	qd	5	vancomycin	0.25	sustained	500	5000	125	mg	qid	10	antibiotic	vancomycin	no	therapeutic	all	adult,olderadult	phase4	0.592179
https://pubmed.ncbi.nlm.nih.gov/26917573	2016	sustained	n/a	c57bl/6	m	504		mouse		vancomycin,colistin,gentamicin,metronidazole+clindamycin+challenge	cumulativemortality	f	t	87	vpi10463	100000			50	250	50	mg/kg	qd	5	vancomycin	0.25	acute	500	5000	125	mg	qid	10	antibiotic	vancomycin	no	therapeutic	all	adult,olderadult	phase3	0.835714
https://pubmed.ncbi.nlm.nih.gov/26917573	2016	sustained	n/a	c57bl/6	m	504		mouse		vancomycin,colistin,gentamicin,metronidazole+clindamycin+challenge	cumulativemortality	f	t	87	vpi10463	100000			50	250	50	mg/kg	qd	5	vancomycin	0.25	sustained	500	5000	125	mg	qid	10	antibiotic	vancomycin	no	therapeutic	all	adult,olderadult	phase3	0.610714
https://pubmed.ncbi.nlm.nih.gov/26917573	2016	sustained	n/a	c57bl/6	m	504		mouse		vancomycin,colistin,gentamicin,metronidazole+clindamycin+challenge	cumulativemortality	f	t	87	vpi10463	100000			50	250	50	mg/kg	qd	5	vancomycin	0.25	acute	500	5000	125	mg	qid	10	antibiotic	vancomycin	no	therapeutic	all	adult,olderadult	phase3	0.818493
https://pubmed.ncbi.nlm.nih.gov/26917573	2016	sustained	n/a	c57bl/6	m	504		mouse		vancomycin,colistin,gentamicin,metronidazole+clindamycin+challenge	cumulativemortality	f	t	87	vpi10463	100000			50	250	50	mg/kg	qd	5	vancomycin	0.25	sustained	500	5000	125	mg	qid	10	antibiotic	vancomycin	no	therapeutic	all	adult,olderadult	phase3	0.589041
https://pubmed.ncbi.nlm.nih.gov/26917573	2016	sustained	n/a	c57bl/6	m	504		mouse		vancomycin,colistin,gentamicin,metronidazole+clindamycin+challenge	cumulativemortality	f	t	87	vpi10463	100000			50	250	50	mg/kg	qd	5	vancomycin	0.25	acute	500	5000	125	mg	qid	10	antibiotic	vancomycin	no	therapeutic	all	adult,olderadult	phase3	0.87963
https://pubmed.ncbi.nlm.nih.gov/26917573	2016	sustained	n/a	c57bl/6	m	504		mouse		vancomycin,colistin,gentamicin,metronidazole+clindamycin+challenge	cumulativemortality	f	t	87	vpi10463	100000			50	250	50	mg/kg	qd	5	vancomycin	0.25	sustained	500	5000	125	mg	qid	10	antibiotic	vancomycin	no	therapeutic	all	adult,olderadult	phase3	0.657407
https://pubmed.ncbi.nlm.nih.gov/26917573	2016	sustained	n/a	c57bl/6	m	504		mouse		vancomycin,colistin,gentamicin,metronidazole+clindamycin+challenge	cumulativemortality	f	t	87	vpi10463	100000			50	250	50	mg/kg	qd	5	vancomycin	0.25	acute	500	5000	125	mg	qid	10	antibiotic	vancomycin	no	therapeutic	all	adult,olderadult	phase3	0.1875
https://pubmed.ncbi.nlm.nih.gov/26917573	2016	sustained	n/a	c57bl/6	m	504		mouse		vancomycin,colistin,gentamicin,metronidazole+clindamycin+challenge	cumulativemortality	f	t	87	vpi10463	100000			50	250	50	mg/kg	qd	5	vancomycin	0.25	sustained	500	5000	125	mg	qid	10	antibiotic	vancomycin	no	therapeutic	all	adult,olderadult	phase3	0.3125
https://pubmed.ncbi.nlm.nih.gov/26917573	2016	sustained	n/a	c57bl/6	m	504		mouse		vancomycin,colistin,gentamicin,metronidazole+clindamycin+challenge	cumulativemortality	f	t	87	vpi10463	100000			50	250	50	mg/kg	qd	5	vancomycin	0.25	acute	500	5000	125	mg	qid	10	antibiotic	vancomycin	yes	therapeutic	all	adult,olderadult	phase2	0.863636
https://pubmed.ncbi.nlm.nih.gov/26917573	2016	sustained	n/a	c57bl/6	m	504		mouse		vancomycin,colistin,gentamicin,metronidazole+clindamycin+challenge	cumulativemortality	f	t	87	vpi10463	100000			50	250	50	mg/kg	qd	5	vancomycin	0.25	sustained	500	5000	125	mg	qid	10	antibiotic	vancomycin	yes	therapeutic	all	adult,olderadult	phase2	0.545455
https://pubmed.ncbi.nlm.nih.gov/26917573	2016	sustained	n/a	c57bl/6	m	504		mouse		vancomycin,colistin,gentamicin,metronidazole+clindamycin+challenge	cumulativemortality	f	t	87	vpi10463	100000			50	250	50	mg/kg	qd	5	vancomycin	0.25	acute	500	5000	125	mg	qid	10	antibiotic	vancomycin	no	therapeutic	all	child	phase3	0.704545
https://pubmed.ncbi.nlm.nih.gov/26917573	2016	sustained	n/a	c57bl/6	m	504		mouse		vancomycin,colistin,gentamicin,metronidazole+clindamycin+challenge	cumulativemortality	f	t	87	vpi10463	100000			50	250	50	mg/kg	qd	5	vancomycin	0.25	sustained	500	5000	125	mg	qid	10	antibiotic	vancomycin	no	therapeutic	all	child	phase3	0.741935
https://pubmed.ncbi.nlm.nih.gov/26917573	2016	sustained	n/a	c57bl/6	m	504		mouse		vancomycin,colistin,gentamicin,metronidazole+clindamycin+challenge	cumulativemortality	f	t	87	vpi10463	100000			50	250	50	mg/kg	qd	5	vancomycin	0.25	acute	500	5000	125	mg	qid	10	antibiotic	vancomycin	no	therapeutic	all	child,adult,olderadult	phase3	0.863281
https://pubmed.ncbi.nlm.nih.gov/26917573	2016	sustained	n/a	c57bl/6	m	504		mouse		vancomycin,colistin,gentamicin,metronidazole+clindamycin+challenge	cumulativemortality	f	t	87	vpi10463	100000			50	250	50	mg/kg	qd	5	vancomycin	0.25	sustained	500	5000	125	mg	qid	10	antibiotic	vancomycin	no	therapeutic	all	child,adult,olderadult	phase3	0.779279
https://pubmed.ncbi.nlm.nih.gov/26917573	2016	sustained	n/a	c57bl/6	m	504		mouse		vancomycin,colistin,gentamicin,metronidazole+clindamycin+challenge	cumulativemortality	f	t	87	vpi10463	100000			50	250	50	mg/kg	qd	5	vancomycin	0.25	acute	500	5000	125	mg	qid	10	antibiotic	vancomycin	no	therapeutic	all	child,adult,olderadult	phase3	0.856678
https://pubmed.ncbi.nlm.nih.gov/26917573	2016	sustained	n/a	c57bl/6	m	504		mouse		vancomycin,colistin,gentamicin,metronidazole+clindamycin+challenge	cumulativemortality	f	t	87	vpi10463	100000			50	250	50	mg/kg	qd	5	vancomycin	0.25	sustained	500	5000	125	mg	qid	10	antibiotic	vancomycin	no	therapeutic	all	child,adult,olderadult	phase3	0.745247
https://pubmed.ncbi.nlm.nih.gov/26917573	2016	sustained	n/a	c57bl/6	m	504		mouse		vancomycin,colistin,gentamicin,metronidazole+clindamycin+challenge	cumulativemortality	f	t	87	vpi10463	100000			50	250	50	mg/kg	qd	5	vancomycin	0.25	acute	500	5000	125	mg	qid	10	antibiotic	vancomycin	no	therapeutic	all	adult,olderadult	phase3	0.634783
https://pubmed.ncbi.nlm.nih.gov/26917573	2016	sustained	n/a	c57bl/6	m	504		mouse		vancomycin,colistin,gentamicin,metronidazole+clindamycin+challenge	cumulativemortality	f	t	87	vpi10463	100000			50	250	50	mg/kg	qd	5	vancomycin	0.25	sustained	500	5000	125	mg	qid	10	antibiotic	vancomycin	no	therapeutic	all	adult,olderadult	phase3	0.863014
https://pubmed.ncbi.nlm.nih.gov/26917573	2016	sustained	n/a	c57bl/6	m	504		mouse		vancomycin,colistin,gentamicin,metronidazole+clindamycin+challenge	cumulativemortality	f	t	87	vpi10463	100000			50	250	50	mg/kg	qd	5	vancomycin	0.25	acute	500	5000	125	mg	qid	10	antibiotic	vancomycin	no	therapeutic	all	adult,olderadult	phase3	0.808
https://pubmed.ncbi.nlm.nih.gov/26917573	2016	sustained	n/a	c57bl/6	m	504		mouse		vancomycin,colistin,gentamicin,metronidazole+clindamycin+challenge	cumulativemortality	f	t	87	vpi10463	100000			50	250	50	mg/kg	qd	5	vancomycin	0.25	sustained	500	5000	125	mg	qid	10	antibiotic	vancomycin	no	therapeutic	all	adult,olderadult	phase3	0.823529
https://pubmed.ncbi.nlm.nih.gov/26917573	2016	sustained	n/a	c57bl/6	m	504		mouse		vancomycin,colistin,gentamicin,metronidazole+clindamycin+challenge	cumulativemortality	f	t	87	vpi10463	100000			50	250	50	mg/kg	qd	5	vancomycin	0.25	acute	500	5000	125	mg	qid	10	antibiotic	vancomycin	no	therapeutic	all	adult,olderadult	phase3	0.80597
https://pubmed.ncbi.nlm.nih.gov/26917573	2016	sustained	n/a	c57bl/6	m	504		mouse		vancomycin,colistin,gentamicin,metronidazole+clindamycin+challenge	cumulativemortality	f	t	87	vpi10463	100000			50	250	50	mg/kg	qd	5	vancomycin	0.25	sustained	500	5000	125	mg	qid	10	antibiotic	vancomycin	no	therapeutic	all	adult,olderadult	phase3	0.757009
https://pubmed.ncbi.nlm.nih.gov/26917573	2016	sustained	n/a	c57bl/6	m	504		mouse		vancomycin,colistin,gentamicin,metronidazole+clindamycin+challenge	cumulativemortality	f	t	87	vpi10463	100000			50	250	50	mg/kg	qd	5	vancomycin	0.25	acute	500	5000	125	mg	qid	10	antibiotic	vancomycin	no	therapeutic	all	adult,olderadult	phase2	0.69697
https://pubmed.ncbi.nlm.nih.gov/26917573	2016	sustained	n/a	c57bl/6	m	504		mouse		vancomycin,colistin,gentamicin,metronidazole+clindamycin+challenge	cumulativemortality	f	t	87	vpi10463	100000			50	250	50	mg/kg	qd	5	vancomycin	0.25	sustained	500	5000	125	mg	qid	10	antibiotic	vancomycin	no	therapeutic	all	adult,olderadult	phase2	0.608696
https://pubmed.ncbi.nlm.nih.gov/26917573	2016	sustained	n/a	c57bl/6	m	504		mouse		vancomycin,colistin,gentamicin,metronidazole+clindamycin+challenge	cumulativemortality	f	t	87	vpi10463	100000			50	250	50	mg/kg	qd	5	vancomycin	0.25	acute	500	5000	125	mg	qid	10	antibiotic	vancomycin	no	therapeutic	all	adult,olderadult	phase4	0.666667
https://pubmed.ncbi.nlm.nih.gov/26917573	2016	sustained	n/a	c57bl/6	m	504		mouse		vancomycin,colistin,gentamicin,metronidazole+clindamycin+challenge	cumulativemortality	f	t	87	vpi10463	100000			50	250	50	mg/kg	qd	5	vancomycin	0.25	acute	500	5000	125	mg	qid	10	antibiotic	vancomycin	no	therapeutic	all	adult,olderadult	phase4	1
https://pubmed.ncbi.nlm.nih.gov/26917573	2016	sustained	n/a	c57bl/6	m	504		mouse		vancomycin,colistin,gentamicin,metronidazole+clindamycin+challenge	cumulativemortality	f	t	87	vpi10463	100000			50	250	50	mg/kg	qd	5	vancomycin	0.25	sustained							control	vancomycin	no	therapeutic	all	adult,olderadult	phase3	0.740741
https://pubmed.ncbi.nlm.nih.gov/26917573	2016	sustained	n/a	c57bl/6	m	504		mouse		vancomycin,colistin,gentamicin,metronidazole+clindamycin+challenge	cumulativemortality	f	t	87	vpi10463	100000			50	250	50	mg/kg	qd	5	vancomycin	0.25	sustained							antibiotic	vancomycin	no	therapeutic	all	adult,olderadult	phase3	0.721519
https://pubmed.ncbi.nlm.nih.gov/26917573	2016	sustained	n/a	c57bl/6	m	504		mouse		vancomycin,colistin,gentamicin,metronidazole+clindamycin+challenge	cumulativemortality	f	t	87	vpi10463	100000			50	250	50	mg/kg	qd	5	vancomycin	0.25	sustained							antibiotic	vancomycin	no	therapeutic	all	adult,olderadult	phase2	0.263158
https://pubmed.ncbi.nlm.nih.gov/26917573	2016	sustained	n/a	c57bl/6	m	504		mouse		vancomycin,colistin,gentamicin,metronidazole+clindamycin+challenge	cumulativemortality	f	t	87	vpi10463	100000			50	250	50	mg/kg	qd	5	vancomycin	0.25	acute							antibiotic	vancomycin	no	therapeutic	all	adult,olderadult	phase2	0.306667
https://pubmed.ncbi.nlm.nih.gov/26917573	2016	sustained	n/a	c57bl/6	m	504		mouse		vancomycin,colistin,gentamicin,metronidazole+clindamycin+challenge	cumulativemortality	f	t	87	vpi10463	100000			50	250	50	mg/kg	qd	5	vancomycin	0.25	sustained							antibiotic	vancomycin	no	therapeutic	all	adult,olderadult	phase2	0.306667
https://pubmed.ncbi.nlm.nih.gov/26917573	2016	acute	n/a	c57bl/6	m	56		mouse		vancomycin,colistin,gentamicin,metronidazole+clindamycin+challenge	cumulativemortality	f	t	87	vpi10463	100000			50	250	50	mg/kg	qd	5	vancomycin	1	acute	500	5000	125	mg	qid	10	antibiotic	vancomycin	yes	therapeutic	all	adult,olderadult	phase2	0.893939
https://pubmed.ncbi.nlm.nih.gov/26917573	2016	acute	n/a	c57bl/6	m	56		mouse		vancomycin,colistin,gentamicin,metronidazole+clindamycin+challenge	cumulativemortality	f	t	87	vpi10463	100000			50	250	50	mg/kg	qd	5	vancomycin	1	sustained	500	5000	125	mg	qid	10	antibiotic	vancomycin	yes	therapeutic	all	adult,olderadult	phase2	0.644068
https://pubmed.ncbi.nlm.nih.gov/26917573	2016	acute	n/a	c57bl/6	m	56		mouse		vancomycin,colistin,gentamicin,metronidazole+clindamycin+challenge	cumulativemortality	f	t	87	vpi10463	100000			50	250	50	mg/kg	qd	5	vancomycin	1	sustained	125		125	mg	qd		antibiotic	vancomycin	no	prophylactic	all	olderadult	phase4	1
https://pubmed.ncbi.nlm.nih.gov/26917573	2016	acute	n/a	c57bl/6	m	56		mouse		vancomycin,colistin,gentamicin,metronidazole+clindamycin+challenge	cumulativemortality	f	t	87	vpi10463	100000			50	250	50	mg/kg	qd	5	vancomycin	1	acute	500	5000	125	mg	qid	10	antibiotic	vancomycin	no	therapeutic	all	adult,olderadult	phase3	0.853821
https://pubmed.ncbi.nlm.nih.gov/26917573	2016	acute	n/a	c57bl/6	m	56		mouse		vancomycin,colistin,gentamicin,metronidazole+clindamycin+challenge	cumulativemortality	f	t	87	vpi10463	100000			50	250	50	mg/kg	qd	5	vancomycin	1	sustained	500	5000	125	mg	qid	10	antibiotic	vancomycin	no	therapeutic	all	adult,olderadult	phase3	0.61794
https://pubmed.ncbi.nlm.nih.gov/26917573	2016	acute	n/a	c57bl/6	m	56		mouse		vancomycin,colistin,gentamicin,metronidazole+clindamycin+challenge	cumulativemortality	f	t	87	vpi10463	100000			50	250	50	mg/kg	qd	5	vancomycin	1	acute	500	5000	125	mg	qid	10	antibiotic	vancomycin	no	therapeutic	all	adult,olderadult	phase3	0.849057
https://pubmed.ncbi.nlm.nih.gov/26917573	2016	acute	n/a	c57bl/6	m	56		mouse		vancomycin,colistin,gentamicin,metronidazole+clindamycin+challenge	cumulativemortality	f	t	87	vpi10463	100000			50	250	50	mg/kg	qd	5	vancomycin	1	sustained	500	5000	125	mg	qid	10	antibiotic	vancomycin	no	therapeutic	all	adult,olderadult	phase3	0.622642
https://pubmed.ncbi.nlm.nih.gov/26917573	2016	acute	n/a	c57bl/6	m	56		mouse		vancomycin,colistin,gentamicin,metronidazole+clindamycin+challenge	cumulativemortality	f	t	87	vpi10463	100000			50	250	50	mg/kg	qd	5	vancomycin	1	acute	500	5000	125	mg	qid	10	antibiotic	vancomycin	no	therapeutic	all	adult,olderadult	phase4	0.821229
https://pubmed.ncbi.nlm.nih.gov/26917573	2016	acute	n/a	c57bl/6	m	56		mouse		vancomycin,colistin,gentamicin,metronidazole+clindamycin+challenge	cumulativemortality	f	t	87	vpi10463	100000			50	250	50	mg/kg	qd	5	vancomycin	1	sustained	500	5000	125	mg	qid	10	antibiotic	vancomycin	no	therapeutic	all	adult,olderadult	phase4	0.592179
https://pubmed.ncbi.nlm.nih.gov/26917573	2016	acute	n/a	c57bl/6	m	56		mouse		vancomycin,colistin,gentamicin,metronidazole+clindamycin+challenge	cumulativemortality	f	t	87	vpi10463	100000			50	250	50	mg/kg	qd	5	vancomycin	1	acute	500	5000	125	mg	qid	10	antibiotic	vancomycin	no	therapeutic	all	adult,olderadult	phase3	0.835714
https://pubmed.ncbi.nlm.nih.gov/26917573	2016	acute	n/a	c57bl/6	m	56		mouse		vancomycin,colistin,gentamicin,metronidazole+clindamycin+challenge	cumulativemortality	f	t	87	vpi10463	100000			50	250	50	mg/kg	qd	5	vancomycin	1	sustained	500	5000	125	mg	qid	10	antibiotic	vancomycin	no	therapeutic	all	adult,olderadult	phase3	0.610714
https://pubmed.ncbi.nlm.nih.gov/26917573	2016	acute	n/a	c57bl/6	m	56		mouse		vancomycin,colistin,gentamicin,metronidazole+clindamycin+challenge	cumulativemortality	f	t	87	vpi10463	100000			50	250	50	mg/kg	qd	5	vancomycin	1	acute	500	5000	125	mg	qid	10	antibiotic	vancomycin	no	therapeutic	all	adult,olderadult	phase3	0.818493
https://pubmed.ncbi.nlm.nih.gov/26917573	2016	acute	n/a	c57bl/6	m	56		mouse		vancomycin,colistin,gentamicin,metronidazole+clindamycin+challenge	cumulativemortality	f	t	87	vpi10463	100000			50	250	50	mg/kg	qd	5	vancomycin	1	sustained	500	5000	125	mg	qid	10	antibiotic	vancomycin	no	therapeutic	all	adult,olderadult	phase3	0.589041
https://pubmed.ncbi.nlm.nih.gov/26917573	2016	acute	n/a	c57bl/6	m	56		mouse		vancomycin,colistin,gentamicin,metronidazole+clindamycin+challenge	cumulativemortality	f	t	87	vpi10463	100000			50	250	50	mg/kg	qd	5	vancomycin	1	acute	500	5000	125	mg	qid	10	antibiotic	vancomycin	no	therapeutic	all	adult,olderadult	phase3	0.87963
https://pubmed.ncbi.nlm.nih.gov/26917573	2016	acute	n/a	c57bl/6	m	56		mouse		vancomycin,colistin,gentamicin,metronidazole+clindamycin+challenge	cumulativemortality	f	t	87	vpi10463	100000			50	250	50	mg/kg	qd	5	vancomycin	1	sustained	500	5000	125	mg	qid	10	antibiotic	vancomycin	no	therapeutic	all	adult,olderadult	phase3	0.657407
https://pubmed.ncbi.nlm.nih.gov/26917573	2016	acute	n/a	c57bl/6	m	56		mouse		vancomycin,colistin,gentamicin,metronidazole+clindamycin+challenge	cumulativemortality	f	t	87	vpi10463	100000			50	250	50	mg/kg	qd	5	vancomycin	1	acute	500	5000	125	mg	qid	10	antibiotic	vancomycin	no	therapeutic	all	adult,olderadult	phase3	0.1875
https://pubmed.ncbi.nlm.nih.gov/26917573	2016	acute	n/a	c57bl/6	m	56		mouse		vancomycin,colistin,gentamicin,metronidazole+clindamycin+challenge	cumulativemortality	f	t	87	vpi10463	100000			50	250	50	mg/kg	qd	5	vancomycin	1	sustained	500	5000	125	mg	qid	10	antibiotic	vancomycin	no	therapeutic	all	adult,olderadult	phase3	0.3125
https://pubmed.ncbi.nlm.nih.gov/26917573	2016	acute	n/a	c57bl/6	m	56		mouse		vancomycin,colistin,gentamicin,metronidazole+clindamycin+challenge	cumulativemortality	f	t	87	vpi10463	100000			50	250	50	mg/kg	qd	5	vancomycin	1	acute	500	5000	125	mg	qid	10	antibiotic	vancomycin	yes	therapeutic	all	adult,olderadult	phase2	0.863636
https://pubmed.ncbi.nlm.nih.gov/26917573	2016	acute	n/a	c57bl/6	m	56		mouse		vancomycin,colistin,gentamicin,metronidazole+clindamycin+challenge	cumulativemortality	f	t	87	vpi10463	100000			50	250	50	mg/kg	qd	5	vancomycin	1	sustained	500	5000	125	mg	qid	10	antibiotic	vancomycin	yes	therapeutic	all	adult,olderadult	phase2	0.545455
https://pubmed.ncbi.nlm.nih.gov/26917573	2016	acute	n/a	c57bl/6	m	56		mouse		vancomycin,colistin,gentamicin,metronidazole+clindamycin+challenge	cumulativemortality	f	t	87	vpi10463	100000			50	250	50	mg/kg	qd	5	vancomycin	1	acute	500	5000	125	mg	qid	10	antibiotic	vancomycin	no	therapeutic	all	child	phase3	0.704545
https://pubmed.ncbi.nlm.nih.gov/26917573	2016	acute	n/a	c57bl/6	m	56		mouse		vancomycin,colistin,gentamicin,metronidazole+clindamycin+challenge	cumulativemortality	f	t	87	vpi10463	100000			50	250	50	mg/kg	qd	5	vancomycin	1	sustained	500	5000	125	mg	qid	10	antibiotic	vancomycin	no	therapeutic	all	child	phase3	0.741935
https://pubmed.ncbi.nlm.nih.gov/26917573	2016	acute	n/a	c57bl/6	m	56		mouse		vancomycin,colistin,gentamicin,metronidazole+clindamycin+challenge	cumulativemortality	f	t	87	vpi10463	100000			50	250	50	mg/kg	qd	5	vancomycin	1	acute	500	5000	125	mg	qid	10	antibiotic	vancomycin	no	therapeutic	all	child,adult,olderadult	phase3	0.863281
https://pubmed.ncbi.nlm.nih.gov/26917573	2016	acute	n/a	c57bl/6	m	56		mouse		vancomycin,colistin,gentamicin,metronidazole+clindamycin+challenge	cumulativemortality	f	t	87	vpi10463	100000			50	250	50	mg/kg	qd	5	vancomycin	1	sustained	500	5000	125	mg	qid	10	antibiotic	vancomycin	no	therapeutic	all	child,adult,olderadult	phase3	0.779279
https://pubmed.ncbi.nlm.nih.gov/26917573	2016	acute	n/a	c57bl/6	m	56		mouse		vancomycin,colistin,gentamicin,metronidazole+clindamycin+challenge	cumulativemortality	f	t	87	vpi10463	100000			50	250	50	mg/kg	qd	5	vancomycin	1	acute	500	5000	125	mg	qid	10	antibiotic	vancomycin	no	therapeutic	all	child,adult,olderadult	phase3	0.856678
https://pubmed.ncbi.nlm.nih.gov/26917573	2016	acute	n/a	c57bl/6	m	56		mouse		vancomycin,colistin,gentamicin,metronidazole+clindamycin+challenge	cumulativemortality	f	t	87	vpi10463	100000			50	250	50	mg/kg	qd	5	vancomycin	1	sustained	500	5000	125	mg	qid	10	antibiotic	vancomycin	no	therapeutic	all	child,adult,olderadult	phase3	0.745247
https://pubmed.ncbi.nlm.nih.gov/26917573	2016	acute	n/a	c57bl/6	m	56		mouse		vancomycin,colistin,gentamicin,metronidazole+clindamycin+challenge	cumulativemortality	f	t	87	vpi10463	100000			50	250	50	mg/kg	qd	5	vancomycin	1	acute	500	5000	125	mg	qid	10	antibiotic	vancomycin	no	therapeutic	all	adult,olderadult	phase3	0.634783
https://pubmed.ncbi.nlm.nih.gov/26917573	2016	acute	n/a	c57bl/6	m	56		mouse		vancomycin,colistin,gentamicin,metronidazole+clindamycin+challenge	cumulativemortality	f	t	87	vpi10463	100000			50	250	50	mg/kg	qd	5	vancomycin	1	sustained	500	5000	125	mg	qid	10	antibiotic	vancomycin	no	therapeutic	all	adult,olderadult	phase3	0.863014
https://pubmed.ncbi.nlm.nih.gov/26917573	2016	acute	n/a	c57bl/6	m	56		mouse		vancomycin,colistin,gentamicin,metronidazole+clindamycin+challenge	cumulativemortality	f	t	87	vpi10463	100000			50	250	50	mg/kg	qd	5	vancomycin	1	acute	500	5000	125	mg	qid	10	antibiotic	vancomycin	no	therapeutic	all	adult,olderadult	phase3	0.808
https://pubmed.ncbi.nlm.nih.gov/26917573	2016	acute	n/a	c57bl/6	m	56		mouse		vancomycin,colistin,gentamicin,metronidazole+clindamycin+challenge	cumulativemortality	f	t	87	vpi10463	100000			50	250	50	mg/kg	qd	5	vancomycin	1	sustained	500	5000	125	mg	qid	10	antibiotic	vancomycin	no	therapeutic	all	adult,olderadult	phase3	0.823529
https://pubmed.ncbi.nlm.nih.gov/26917573	2016	acute	n/a	c57bl/6	m	56		mouse		vancomycin,colistin,gentamicin,metronidazole+clindamycin+challenge	cumulativemortality	f	t	87	vpi10463	100000			50	250	50	mg/kg	qd	5	vancomycin	1	acute	500	5000	125	mg	qid	10	antibiotic	vancomycin	no	therapeutic	all	adult,olderadult	phase3	0.80597
https://pubmed.ncbi.nlm.nih.gov/26917573	2016	acute	n/a	c57bl/6	m	56		mouse		vancomycin,colistin,gentamicin,metronidazole+clindamycin+challenge	cumulativemortality	f	t	87	vpi10463	100000			50	250	50	mg/kg	qd	5	vancomycin	1	sustained	500	5000	125	mg	qid	10	antibiotic	vancomycin	no	therapeutic	all	adult,olderadult	phase3	0.757009
https://pubmed.ncbi.nlm.nih.gov/26917573	2016	acute	n/a	c57bl/6	m	56		mouse		vancomycin,colistin,gentamicin,metronidazole+clindamycin+challenge	cumulativemortality	f	t	87	vpi10463	100000			50	250	50	mg/kg	qd	5	vancomycin	1	acute	500	5000	125	mg	qid	10	antibiotic	vancomycin	no	therapeutic	all	adult,olderadult	phase2	0.69697
https://pubmed.ncbi.nlm.nih.gov/26917573	2016	acute	n/a	c57bl/6	m	56		mouse		vancomycin,colistin,gentamicin,metronidazole+clindamycin+challenge	cumulativemortality	f	t	87	vpi10463	100000			50	250	50	mg/kg	qd	5	vancomycin	1	sustained	500	5000	125	mg	qid	10	antibiotic	vancomycin	no	therapeutic	all	adult,olderadult	phase2	0.608696
https://pubmed.ncbi.nlm.nih.gov/26917573	2016	acute	n/a	c57bl/6	m	56		mouse		vancomycin,colistin,gentamicin,metronidazole+clindamycin+challenge	cumulativemortality	f	t	87	vpi10463	100000			50	250	50	mg/kg	qd	5	vancomycin	1	acute	500	5000	125	mg	qid	10	antibiotic	vancomycin	no	therapeutic	all	adult,olderadult	phase4	0.666667
https://pubmed.ncbi.nlm.nih.gov/26917573	2016	acute	n/a	c57bl/6	m	56		mouse		vancomycin,colistin,gentamicin,metronidazole+clindamycin+challenge	cumulativemortality	f	t	87	vpi10463	100000			50	250	50	mg/kg	qd	5	vancomycin	1	acute	500	5000	125	mg	qid	10	antibiotic	vancomycin	no	therapeutic	all	adult,olderadult	phase4	1
https://pubmed.ncbi.nlm.nih.gov/26917573	2016	acute	n/a	c57bl/6	m	56		mouse		vancomycin,colistin,gentamicin,metronidazole+clindamycin+challenge	cumulativemortality	f	t	87	vpi10463	100000			50	250	50	mg/kg	qd	5	vancomycin	1	sustained							control	vancomycin	no	therapeutic	all	adult,olderadult	phase3	0.740741
https://pubmed.ncbi.nlm.nih.gov/26917573	2016	acute	n/a	c57bl/6	m	56		mouse		vancomycin,colistin,gentamicin,metronidazole+clindamycin+challenge	cumulativemortality	f	t	87	vpi10463	100000			50	250	50	mg/kg	qd	5	vancomycin	1	sustained							antibiotic	vancomycin	no	therapeutic	all	adult,olderadult	phase3	0.721519
https://pubmed.ncbi.nlm.nih.gov/26917573	2016	acute	n/a	c57bl/6	m	56		mouse		vancomycin,colistin,gentamicin,metronidazole+clindamycin+challenge	cumulativemortality	f	t	87	vpi10463	100000			50	250	50	mg/kg	qd	5	vancomycin	1	sustained							antibiotic	vancomycin	no	therapeutic	all	adult,olderadult	phase2	0.263158
https://pubmed.ncbi.nlm.nih.gov/26917573	2016	acute	n/a	c57bl/6	m	56		mouse		vancomycin,colistin,gentamicin,metronidazole+clindamycin+challenge	cumulativemortality	f	t	87	vpi10463	100000			50	250	50	mg/kg	qd	5	vancomycin	1	acute							antibiotic	vancomycin	no	therapeutic	all	adult,olderadult	phase2	0.306667
https://pubmed.ncbi.nlm.nih.gov/26917573	2016	acute	n/a	c57bl/6	m	56		mouse		vancomycin,colistin,gentamicin,metronidazole+clindamycin+challenge	cumulativemortality	f	t	87	vpi10463	100000			50	250	50	mg/kg	qd	5	vancomycin	1	sustained							antibiotic	vancomycin	no	therapeutic	all	adult,olderadult	phase2	0.306667
https://pubmed.ncbi.nlm.nih.gov/26917573	2016	sustained	n/a	c57bl/6	m	56		mouse		vancomycin,colistin,gentamicin,metronidazole+clindamycin+challenge	cumulativemortality	f	t	87	vpi10463	100000			50	250	50	mg/kg	qd	5	vancomycin	1	acute	500	5000	125	mg	qid	10	antibiotic	vancomycin	yes	therapeutic	all	adult,olderadult	phase2	0.893939
https://pubmed.ncbi.nlm.nih.gov/26917573	2016	sustained	n/a	c57bl/6	m	56		mouse		vancomycin,colistin,gentamicin,metronidazole+clindamycin+challenge	cumulativemortality	f	t	87	vpi10463	100000			50	250	50	mg/kg	qd	5	vancomycin	1	sustained	500	5000	125	mg	qid	10	antibiotic	vancomycin	yes	therapeutic	all	adult,olderadult	phase2	0.644068
https://pubmed.ncbi.nlm.nih.gov/26917573	2016	sustained	n/a	c57bl/6	m	56		mouse		vancomycin,colistin,gentamicin,metronidazole+clindamycin+challenge	cumulativemortality	f	t	87	vpi10463	100000			50	250	50	mg/kg	qd	5	vancomycin	1	sustained	125		125	mg	qd		antibiotic	vancomycin	no	prophylactic	all	olderadult	phase4	1
https://pubmed.ncbi.nlm.nih.gov/26917573	2016	sustained	n/a	c57bl/6	m	56		mouse		vancomycin,colistin,gentamicin,metronidazole+clindamycin+challenge	cumulativemortality	f	t	87	vpi10463	100000			50	250	50	mg/kg	qd	5	vancomycin	1	acute	500	5000	125	mg	qid	10	antibiotic	vancomycin	no	therapeutic	all	adult,olderadult	phase3	0.853821
https://pubmed.ncbi.nlm.nih.gov/26917573	2016	sustained	n/a	c57bl/6	m	56		mouse		vancomycin,colistin,gentamicin,metronidazole+clindamycin+challenge	cumulativemortality	f	t	87	vpi10463	100000			50	250	50	mg/kg	qd	5	vancomycin	1	sustained	500	5000	125	mg	qid	10	antibiotic	vancomycin	no	therapeutic	all	adult,olderadult	phase3	0.61794
https://pubmed.ncbi.nlm.nih.gov/26917573	2016	sustained	n/a	c57bl/6	m	56		mouse		vancomycin,colistin,gentamicin,metronidazole+clindamycin+challenge	cumulativemortality	f	t	87	vpi10463	100000			50	250	50	mg/kg	qd	5	vancomycin	1	acute	500	5000	125	mg	qid	10	antibiotic	vancomycin	no	therapeutic	all	adult,olderadult	phase3	0.849057
https://pubmed.ncbi.nlm.nih.gov/26917573	2016	sustained	n/a	c57bl/6	m	56		mouse		vancomycin,colistin,gentamicin,metronidazole+clindamycin+challenge	cumulativemortality	f	t	87	vpi10463	100000			50	250	50	mg/kg	qd	5	vancomycin	1	sustained	500	5000	125	mg	qid	10	antibiotic	vancomycin	no	therapeutic	all	adult,olderadult	phase3	0.622642
https://pubmed.ncbi.nlm.nih.gov/26917573	2016	sustained	n/a	c57bl/6	m	56		mouse		vancomycin,colistin,gentamicin,metronidazole+clindamycin+challenge	cumulativemortality	f	t	87	vpi10463	100000			50	250	50	mg/kg	qd	5	vancomycin	1	acute	500	5000	125	mg	qid	10	antibiotic	vancomycin	no	therapeutic	all	adult,olderadult	phase4	0.821229
https://pubmed.ncbi.nlm.nih.gov/26917573	2016	sustained	n/a	c57bl/6	m	56		mouse		vancomycin,colistin,gentamicin,metronidazole+clindamycin+challenge	cumulativemortality	f	t	87	vpi10463	100000			50	250	50	mg/kg	qd	5	vancomycin	1	sustained	500	5000	125	mg	qid	10	antibiotic	vancomycin	no	therapeutic	all	adult,olderadult	phase4	0.592179
https://pubmed.ncbi.nlm.nih.gov/26917573	2016	sustained	n/a	c57bl/6	m	56		mouse		vancomycin,colistin,gentamicin,metronidazole+clindamycin+challenge	cumulativemortality	f	t	87	vpi10463	100000			50	250	50	mg/kg	qd	5	vancomycin	1	acute	500	5000	125	mg	qid	10	antibiotic	vancomycin	no	therapeutic	all	adult,olderadult	phase3	0.835714
https://pubmed.ncbi.nlm.nih.gov/26917573	2016	sustained	n/a	c57bl/6	m	56		mouse		vancomycin,colistin,gentamicin,metronidazole+clindamycin+challenge	cumulativemortality	f	t	87	vpi10463	100000			50	250	50	mg/kg	qd	5	vancomycin	1	sustained	500	5000	125	mg	qid	10	antibiotic	vancomycin	no	therapeutic	all	adult,olderadult	phase3	0.610714
https://pubmed.ncbi.nlm.nih.gov/26917573	2016	sustained	n/a	c57bl/6	m	56		mouse		vancomycin,colistin,gentamicin,metronidazole+clindamycin+challenge	cumulativemortality	f	t	87	vpi10463	100000			50	250	50	mg/kg	qd	5	vancomycin	1	acute	500	5000	125	mg	qid	10	antibiotic	vancomycin	no	therapeutic	all	adult,olderadult	phase3	0.818493
https://pubmed.ncbi.nlm.nih.gov/26917573	2016	sustained	n/a	c57bl/6	m	56		mouse		vancomycin,colistin,gentamicin,metronidazole+clindamycin+challenge	cumulativemortality	f	t	87	vpi10463	100000			50	250	50	mg/kg	qd	5	vancomycin	1	sustained	500	5000	125	mg	qid	10	antibiotic	vancomycin	no	therapeutic	all	adult,olderadult	phase3	0.589041
https://pubmed.ncbi.nlm.nih.gov/26917573	2016	sustained	n/a	c57bl/6	m	56		mouse		vancomycin,colistin,gentamicin,metronidazole+clindamycin+challenge	cumulativemortality	f	t	87	vpi10463	100000			50	250	50	mg/kg	qd	5	vancomycin	1	acute	500	5000	125	mg	qid	10	antibiotic	vancomycin	no	therapeutic	all	adult,olderadult	phase3	0.87963
https://pubmed.ncbi.nlm.nih.gov/26917573	2016	sustained	n/a	c57bl/6	m	56		mouse		vancomycin,colistin,gentamicin,metronidazole+clindamycin+challenge	cumulativemortality	f	t	87	vpi10463	100000			50	250	50	mg/kg	qd	5	vancomycin	1	sustained	500	5000	125	mg	qid	10	antibiotic	vancomycin	no	therapeutic	all	adult,olderadult	phase3	0.657407
https://pubmed.ncbi.nlm.nih.gov/26917573	2016	sustained	n/a	c57bl/6	m	56		mouse		vancomycin,colistin,gentamicin,metronidazole+clindamycin+challenge	cumulativemortality	f	t	87	vpi10463	100000			50	250	50	mg/kg	qd	5	vancomycin	1	acute	500	5000	125	mg	qid	10	antibiotic	vancomycin	no	therapeutic	all	adult,olderadult	phase3	0.1875
https://pubmed.ncbi.nlm.nih.gov/26917573	2016	sustained	n/a	c57bl/6	m	56		mouse		vancomycin,colistin,gentamicin,metronidazole+clindamycin+challenge	cumulativemortality	f	t	87	vpi10463	100000			50	250	50	mg/kg	qd	5	vancomycin	1	sustained	500	5000	125	mg	qid	10	antibiotic	vancomycin	no	therapeutic	all	adult,olderadult	phase3	0.3125
https://pubmed.ncbi.nlm.nih.gov/26917573	2016	sustained	n/a	c57bl/6	m	56		mouse		vancomycin,colistin,gentamicin,metronidazole+clindamycin+challenge	cumulativemortality	f	t	87	vpi10463	100000			50	250	50	mg/kg	qd	5	vancomycin	1	acute	500	5000	125	mg	qid	10	antibiotic	vancomycin	yes	therapeutic	all	adult,olderadult	phase2	0.863636
https://pubmed.ncbi.nlm.nih.gov/26917573	2016	sustained	n/a	c57bl/6	m	56		mouse		vancomycin,colistin,gentamicin,metronidazole+clindamycin+challenge	cumulativemortality	f	t	87	vpi10463	100000			50	250	50	mg/kg	qd	5	vancomycin	1	sustained	500	5000	125	mg	qid	10	antibiotic	vancomycin	yes	therapeutic	all	adult,olderadult	phase2	0.545455
https://pubmed.ncbi.nlm.nih.gov/26917573	2016	sustained	n/a	c57bl/6	m	56		mouse		vancomycin,colistin,gentamicin,metronidazole+clindamycin+challenge	cumulativemortality	f	t	87	vpi10463	100000			50	250	50	mg/kg	qd	5	vancomycin	1	acute	500	5000	125	mg	qid	10	antibiotic	vancomycin	no	therapeutic	all	child	phase3	0.704545
https://pubmed.ncbi.nlm.nih.gov/26917573	2016	sustained	n/a	c57bl/6	m	56		mouse		vancomycin,colistin,gentamicin,metronidazole+clindamycin+challenge	cumulativemortality	f	t	87	vpi10463	100000			50	250	50	mg/kg	qd	5	vancomycin	1	sustained	500	5000	125	mg	qid	10	antibiotic	vancomycin	no	therapeutic	all	child	phase3	0.741935
https://pubmed.ncbi.nlm.nih.gov/26917573	2016	sustained	n/a	c57bl/6	m	56		mouse		vancomycin,colistin,gentamicin,metronidazole+clindamycin+challenge	cumulativemortality	f	t	87	vpi10463	100000			50	250	50	mg/kg	qd	5	vancomycin	1	acute	500	5000	125	mg	qid	10	antibiotic	vancomycin	no	therapeutic	all	child,adult,olderadult	phase3	0.863281
https://pubmed.ncbi.nlm.nih.gov/26917573	2016	sustained	n/a	c57bl/6	m	56		mouse		vancomycin,colistin,gentamicin,metronidazole+clindamycin+challenge	cumulativemortality	f	t	87	vpi10463	100000			50	250	50	mg/kg	qd	5	vancomycin	1	sustained	500	5000	125	mg	qid	10	antibiotic	vancomycin	no	therapeutic	all	child,adult,olderadult	phase3	0.779279
https://pubmed.ncbi.nlm.nih.gov/26917573	2016	sustained	n/a	c57bl/6	m	56		mouse		vancomycin,colistin,gentamicin,metronidazole+clindamycin+challenge	cumulativemortality	f	t	87	vpi10463	100000			50	250	50	mg/kg	qd	5	vancomycin	1	acute	500	5000	125	mg	qid	10	antibiotic	vancomycin	no	therapeutic	all	child,adult,olderadult	phase3	0.856678
https://pubmed.ncbi.nlm.nih.gov/26917573	2016	sustained	n/a	c57bl/6	m	56		mouse		vancomycin,colistin,gentamicin,metronidazole+clindamycin+challenge	cumulativemortality	f	t	87	vpi10463	100000			50	250	50	mg/kg	qd	5	vancomycin	1	sustained	500	5000	125	mg	qid	10	antibiotic	vancomycin	no	therapeutic	all	child,adult,olderadult	phase3	0.745247
https://pubmed.ncbi.nlm.nih.gov/26917573	2016	sustained	n/a	c57bl/6	m	56		mouse		vancomycin,colistin,gentamicin,metronidazole+clindamycin+challenge	cumulativemortality	f	t	87	vpi10463	100000			50	250	50	mg/kg	qd	5	vancomycin	1	acute	500	5000	125	mg	qid	10	antibiotic	vancomycin	no	therapeutic	all	adult,olderadult	phase3	0.634783
https://pubmed.ncbi.nlm.nih.gov/26917573	2016	sustained	n/a	c57bl/6	m	56		mouse		vancomycin,colistin,gentamicin,metronidazole+clindamycin+challenge	cumulativemortality	f	t	87	vpi10463	100000			50	250	50	mg/kg	qd	5	vancomycin	1	sustained	500	5000	125	mg	qid	10	antibiotic	vancomycin	no	therapeutic	all	adult,olderadult	phase3	0.863014
https://pubmed.ncbi.nlm.nih.gov/26917573	2016	sustained	n/a	c57bl/6	m	56		mouse		vancomycin,colistin,gentamicin,metronidazole+clindamycin+challenge	cumulativemortality	f	t	87	vpi10463	100000			50	250	50	mg/kg	qd	5	vancomycin	1	acute	500	5000	125	mg	qid	10	antibiotic	vancomycin	no	therapeutic	all	adult,olderadult	phase3	0.808
https://pubmed.ncbi.nlm.nih.gov/26917573	2016	sustained	n/a	c57bl/6	m	56		mouse		vancomycin,colistin,gentamicin,metronidazole+clindamycin+challenge	cumulativemortality	f	t	87	vpi10463	100000			50	250	50	mg/kg	qd	5	vancomycin	1	sustained	500	5000	125	mg	qid	10	antibiotic	vancomycin	no	therapeutic	all	adult,olderadult	phase3	0.823529
https://pubmed.ncbi.nlm.nih.gov/26917573	2016	sustained	n/a	c57bl/6	m	56		mouse		vancomycin,colistin,gentamicin,metronidazole+clindamycin+challenge	cumulativemortality	f	t	87	vpi10463	100000			50	250	50	mg/kg	qd	5	vancomycin	1	acute	500	5000	125	mg	qid	10	antibiotic	vancomycin	no	therapeutic	all	adult,olderadult	phase3	0.80597
https://pubmed.ncbi.nlm.nih.gov/26917573	2016	sustained	n/a	c57bl/6	m	56		mouse		vancomycin,colistin,gentamicin,metronidazole+clindamycin+challenge	cumulativemortality	f	t	87	vpi10463	100000			50	250	50	mg/kg	qd	5	vancomycin	1	sustained	500	5000	125	mg	qid	10	antibiotic	vancomycin	no	therapeutic	all	adult,olderadult	phase3	0.757009
https://pubmed.ncbi.nlm.nih.gov/26917573	2016	sustained	n/a	c57bl/6	m	56		mouse		vancomycin,colistin,gentamicin,metronidazole+clindamycin+challenge	cumulativemortality	f	t	87	vpi10463	100000			50	250	50	mg/kg	qd	5	vancomycin	1	acute	500	5000	125	mg	qid	10	antibiotic	vancomycin	no	therapeutic	all	adult,olderadult	phase2	0.69697
https://pubmed.ncbi.nlm.nih.gov/26917573	2016	sustained	n/a	c57bl/6	m	56		mouse		vancomycin,colistin,gentamicin,metronidazole+clindamycin+challenge	cumulativemortality	f	t	87	vpi10463	100000			50	250	50	mg/kg	qd	5	vancomycin	1	sustained	500	5000	125	mg	qid	10	antibiotic	vancomycin	no	therapeutic	all	adult,olderadult	phase2	0.608696
https://pubmed.ncbi.nlm.nih.gov/26917573	2016	sustained	n/a	c57bl/6	m	56		mouse		vancomycin,colistin,gentamicin,metronidazole+clindamycin+challenge	cumulativemortality	f	t	87	vpi10463	100000			50	250	50	mg/kg	qd	5	vancomycin	1	acute	500	5000	125	mg	qid	10	antibiotic	vancomycin	no	therapeutic	all	adult,olderadult	phase4	0.666667
https://pubmed.ncbi.nlm.nih.gov/26917573	2016	sustained	n/a	c57bl/6	m	56		mouse		vancomycin,colistin,gentamicin,metronidazole+clindamycin+challenge	cumulativemortality	f	t	87	vpi10463	100000			50	250	50	mg/kg	qd	5	vancomycin	1	acute	500	5000	125	mg	qid	10	antibiotic	vancomycin	no	therapeutic	all	adult,olderadult	phase4	1
https://pubmed.ncbi.nlm.nih.gov/26917573	2016	sustained	n/a	c57bl/6	m	56		mouse		vancomycin,colistin,gentamicin,metronidazole+clindamycin+challenge	cumulativemortality	f	t	87	vpi10463	100000			50	250	50	mg/kg	qd	5	vancomycin	1	sustained							control	vancomycin	no	therapeutic	all	adult,olderadult	phase3	0.740741
https://pubmed.ncbi.nlm.nih.gov/26917573	2016	sustained	n/a	c57bl/6	m	56		mouse		vancomycin,colistin,gentamicin,metronidazole+clindamycin+challenge	cumulativemortality	f	t	87	vpi10463	100000			50	250	50	mg/kg	qd	5	vancomycin	1	sustained							antibiotic	vancomycin	no	therapeutic	all	adult,olderadult	phase3	0.721519
https://pubmed.ncbi.nlm.nih.gov/26917573	2016	sustained	n/a	c57bl/6	m	56		mouse		vancomycin,colistin,gentamicin,metronidazole+clindamycin+challenge	cumulativemortality	f	t	87	vpi10463	100000			50	250	50	mg/kg	qd	5	vancomycin	1	sustained							antibiotic	vancomycin	no	therapeutic	all	adult,olderadult	phase2	0.263158
https://pubmed.ncbi.nlm.nih.gov/26917573	2016	sustained	n/a	c57bl/6	m	56		mouse		vancomycin,colistin,gentamicin,metronidazole+clindamycin+challenge	cumulativemortality	f	t	87	vpi10463	100000			50	250	50	mg/kg	qd	5	vancomycin	1	acute							antibiotic	vancomycin	no	therapeutic	all	adult,olderadult	phase2	0.306667
https://pubmed.ncbi.nlm.nih.gov/26917573	2016	sustained	n/a	c57bl/6	m	56		mouse		vancomycin,colistin,gentamicin,metronidazole+clindamycin+challenge	cumulativemortality	f	t	87	vpi10463	100000			50	250	50	mg/kg	qd	5	vancomycin	1	sustained							antibiotic	vancomycin	no	therapeutic	all	adult,olderadult	phase2	0.306667
https://pubmed.ncbi.nlm.nih.gov/24277020	2014	acute	n/a	goldensyrian	m	58	111	hamster		clindamycin+challenge	cumulativemortality	t	t	87	vpi10463	100000	cfu	spores	0.3	1.5	0.3	mg/kg	qd	5	vancomycin	0.3	acute	500	5000	125	mg	qid	10	antibiotic	vancomycin	yes	therapeutic	all	adult,olderadult	phase2	0.893939
https://pubmed.ncbi.nlm.nih.gov/24277020	2014	acute	n/a	goldensyrian	m	58	111	hamster		clindamycin+challenge	cumulativemortality	t	t	87	vpi10463	100000	cfu	spores	0.3	1.5	0.3	mg/kg	qd	5	vancomycin	0.3	sustained	500	5000	125	mg	qid	10	antibiotic	vancomycin	yes	therapeutic	all	adult,olderadult	phase2	0.644068
https://pubmed.ncbi.nlm.nih.gov/24277020	2014	acute	n/a	goldensyrian	m	58	111	hamster		clindamycin+challenge	cumulativemortality	t	t	87	vpi10463	100000	cfu	spores	0.3	1.5	0.3	mg/kg	qd	5	vancomycin	0.3	sustained	125		125	mg	qd		antibiotic	vancomycin	no	prophylactic	all	olderadult	phase4	1
https://pubmed.ncbi.nlm.nih.gov/24277020	2014	acute	n/a	goldensyrian	m	58	111	hamster		clindamycin+challenge	cumulativemortality	t	t	87	vpi10463	100000	cfu	spores	0.3	1.5	0.3	mg/kg	qd	5	vancomycin	0.3	acute	500	5000	125	mg	qid	10	antibiotic	vancomycin	no	therapeutic	all	adult,olderadult	phase3	0.853821
https://pubmed.ncbi.nlm.nih.gov/24277020	2014	acute	n/a	goldensyrian	m	58	111	hamster		clindamycin+challenge	cumulativemortality	t	t	87	vpi10463	100000	cfu	spores	0.3	1.5	0.3	mg/kg	qd	5	vancomycin	0.3	sustained	500	5000	125	mg	qid	10	antibiotic	vancomycin	no	therapeutic	all	adult,olderadult	phase3	0.61794
https://pubmed.ncbi.nlm.nih.gov/24277020	2014	acute	n/a	goldensyrian	m	58	111	hamster		clindamycin+challenge	cumulativemortality	t	t	87	vpi10463	100000	cfu	spores	0.3	1.5	0.3	mg/kg	qd	5	vancomycin	0.3	acute	500	5000	125	mg	qid	10	antibiotic	vancomycin	no	therapeutic	all	adult,olderadult	phase3	0.849057
https://pubmed.ncbi.nlm.nih.gov/24277020	2014	acute	n/a	goldensyrian	m	58	111	hamster		clindamycin+challenge	cumulativemortality	t	t	87	vpi10463	100000	cfu	spores	0.3	1.5	0.3	mg/kg	qd	5	vancomycin	0.3	sustained	500	5000	125	mg	qid	10	antibiotic	vancomycin	no	therapeutic	all	adult,olderadult	phase3	0.622642
https://pubmed.ncbi.nlm.nih.gov/24277020	2014	acute	n/a	goldensyrian	m	58	111	hamster		clindamycin+challenge	cumulativemortality	t	t	87	vpi10463	100000	cfu	spores	0.3	1.5	0.3	mg/kg	qd	5	vancomycin	0.3	acute	500	5000	125	mg	qid	10	antibiotic	vancomycin	no	therapeutic	all	adult,olderadult	phase4	0.821229
https://pubmed.ncbi.nlm.nih.gov/24277020	2014	acute	n/a	goldensyrian	m	58	111	hamster		clindamycin+challenge	cumulativemortality	t	t	87	vpi10463	100000	cfu	spores	0.3	1.5	0.3	mg/kg	qd	5	vancomycin	0.3	sustained	500	5000	125	mg	qid	10	antibiotic	vancomycin	no	therapeutic	all	adult,olderadult	phase4	0.592179
https://pubmed.ncbi.nlm.nih.gov/24277020	2014	acute	n/a	goldensyrian	m	58	111	hamster		clindamycin+challenge	cumulativemortality	t	t	87	vpi10463	100000	cfu	spores	0.3	1.5	0.3	mg/kg	qd	5	vancomycin	0.3	acute	500	5000	125	mg	qid	10	antibiotic	vancomycin	no	therapeutic	all	adult,olderadult	phase3	0.835714
https://pubmed.ncbi.nlm.nih.gov/24277020	2014	acute	n/a	goldensyrian	m	58	111	hamster		clindamycin+challenge	cumulativemortality	t	t	87	vpi10463	100000	cfu	spores	0.3	1.5	0.3	mg/kg	qd	5	vancomycin	0.3	sustained	500	5000	125	mg	qid	10	antibiotic	vancomycin	no	therapeutic	all	adult,olderadult	phase3	0.610714
https://pubmed.ncbi.nlm.nih.gov/24277020	2014	acute	n/a	goldensyrian	m	58	111	hamster		clindamycin+challenge	cumulativemortality	t	t	87	vpi10463	100000	cfu	spores	0.3	1.5	0.3	mg/kg	qd	5	vancomycin	0.3	acute	500	5000	125	mg	qid	10	antibiotic	vancomycin	no	therapeutic	all	adult,olderadult	phase3	0.818493
https://pubmed.ncbi.nlm.nih.gov/24277020	2014	acute	n/a	goldensyrian	m	58	111	hamster		clindamycin+challenge	cumulativemortality	t	t	87	vpi10463	100000	cfu	spores	0.3	1.5	0.3	mg/kg	qd	5	vancomycin	0.3	sustained	500	5000	125	mg	qid	10	antibiotic	vancomycin	no	therapeutic	all	adult,olderadult	phase3	0.589041
https://pubmed.ncbi.nlm.nih.gov/24277020	2014	acute	n/a	goldensyrian	m	58	111	hamster		clindamycin+challenge	cumulativemortality	t	t	87	vpi10463	100000	cfu	spores	0.3	1.5	0.3	mg/kg	qd	5	vancomycin	0.3	acute	500	5000	125	mg	qid	10	antibiotic	vancomycin	no	therapeutic	all	adult,olderadult	phase3	0.87963
https://pubmed.ncbi.nlm.nih.gov/24277020	2014	acute	n/a	goldensyrian	m	58	111	hamster		clindamycin+challenge	cumulativemortality	t	t	87	vpi10463	100000	cfu	spores	0.3	1.5	0.3	mg/kg	qd	5	vancomycin	0.3	sustained	500	5000	125	mg	qid	10	antibiotic	vancomycin	no	therapeutic	all	adult,olderadult	phase3	0.657407
https://pubmed.ncbi.nlm.nih.gov/24277020	2014	acute	n/a	goldensyrian	m	58	111	hamster		clindamycin+challenge	cumulativemortality	t	t	87	vpi10463	100000	cfu	spores	0.3	1.5	0.3	mg/kg	qd	5	vancomycin	0.3	acute	500	5000	125	mg	qid	10	antibiotic	vancomycin	no	therapeutic	all	adult,olderadult	phase3	0.1875
https://pubmed.ncbi.nlm.nih.gov/24277020	2014	acute	n/a	goldensyrian	m	58	111	hamster		clindamycin+challenge	cumulativemortality	t	t	87	vpi10463	100000	cfu	spores	0.3	1.5	0.3	mg/kg	qd	5	vancomycin	0.3	sustained	500	5000	125	mg	qid	10	antibiotic	vancomycin	no	therapeutic	all	adult,olderadult	phase3	0.3125
https://pubmed.ncbi.nlm.nih.gov/24277020	2014	acute	n/a	goldensyrian	m	58	111	hamster		clindamycin+challenge	cumulativemortality	t	t	87	vpi10463	100000	cfu	spores	0.3	1.5	0.3	mg/kg	qd	5	vancomycin	0.3	acute	500	5000	125	mg	qid	10	antibiotic	vancomycin	yes	therapeutic	all	adult,olderadult	phase2	0.863636
https://pubmed.ncbi.nlm.nih.gov/24277020	2014	acute	n/a	goldensyrian	m	58	111	hamster		clindamycin+challenge	cumulativemortality	t	t	87	vpi10463	100000	cfu	spores	0.3	1.5	0.3	mg/kg	qd	5	vancomycin	0.3	sustained	500	5000	125	mg	qid	10	antibiotic	vancomycin	yes	therapeutic	all	adult,olderadult	phase2	0.545455
https://pubmed.ncbi.nlm.nih.gov/24277020	2014	acute	n/a	goldensyrian	m	58	111	hamster		clindamycin+challenge	cumulativemortality	t	t	87	vpi10463	100000	cfu	spores	0.3	1.5	0.3	mg/kg	qd	5	vancomycin	0.3	acute	500	5000	125	mg	qid	10	antibiotic	vancomycin	no	therapeutic	all	child	phase3	0.704545
https://pubmed.ncbi.nlm.nih.gov/24277020	2014	acute	n/a	goldensyrian	m	58	111	hamster		clindamycin+challenge	cumulativemortality	t	t	87	vpi10463	100000	cfu	spores	0.3	1.5	0.3	mg/kg	qd	5	vancomycin	0.3	sustained	500	5000	125	mg	qid	10	antibiotic	vancomycin	no	therapeutic	all	child	phase3	0.741935
https://pubmed.ncbi.nlm.nih.gov/24277020	2014	acute	n/a	goldensyrian	m	58	111	hamster		clindamycin+challenge	cumulativemortality	t	t	87	vpi10463	100000	cfu	spores	0.3	1.5	0.3	mg/kg	qd	5	vancomycin	0.3	acute	500	5000	125	mg	qid	10	antibiotic	vancomycin	no	therapeutic	all	child,adult,olderadult	phase3	0.863281
https://pubmed.ncbi.nlm.nih.gov/24277020	2014	acute	n/a	goldensyrian	m	58	111	hamster		clindamycin+challenge	cumulativemortality	t	t	87	vpi10463	100000	cfu	spores	0.3	1.5	0.3	mg/kg	qd	5	vancomycin	0.3	sustained	500	5000	125	mg	qid	10	antibiotic	vancomycin	no	therapeutic	all	child,adult,olderadult	phase3	0.779279
https://pubmed.ncbi.nlm.nih.gov/24277020	2014	acute	n/a	goldensyrian	m	58	111	hamster		clindamycin+challenge	cumulativemortality	t	t	87	vpi10463	100000	cfu	spores	0.3	1.5	0.3	mg/kg	qd	5	vancomycin	0.3	acute	500	5000	125	mg	qid	10	antibiotic	vancomycin	no	therapeutic	all	child,adult,olderadult	phase3	0.856678
https://pubmed.ncbi.nlm.nih.gov/24277020	2014	acute	n/a	goldensyrian	m	58	111	hamster		clindamycin+challenge	cumulativemortality	t	t	87	vpi10463	100000	cfu	spores	0.3	1.5	0.3	mg/kg	qd	5	vancomycin	0.3	sustained	500	5000	125	mg	qid	10	antibiotic	vancomycin	no	therapeutic	all	child,adult,olderadult	phase3	0.745247
https://pubmed.ncbi.nlm.nih.gov/24277020	2014	acute	n/a	goldensyrian	m	58	111	hamster		clindamycin+challenge	cumulativemortality	t	t	87	vpi10463	100000	cfu	spores	0.3	1.5	0.3	mg/kg	qd	5	vancomycin	0.3	acute	500	5000	125	mg	qid	10	antibiotic	vancomycin	no	therapeutic	all	adult,olderadult	phase3	0.634783
https://pubmed.ncbi.nlm.nih.gov/24277020	2014	acute	n/a	goldensyrian	m	58	111	hamster		clindamycin+challenge	cumulativemortality	t	t	87	vpi10463	100000	cfu	spores	0.3	1.5	0.3	mg/kg	qd	5	vancomycin	0.3	sustained	500	5000	125	mg	qid	10	antibiotic	vancomycin	no	therapeutic	all	adult,olderadult	phase3	0.863014
https://pubmed.ncbi.nlm.nih.gov/24277020	2014	acute	n/a	goldensyrian	m	58	111	hamster		clindamycin+challenge	cumulativemortality	t	t	87	vpi10463	100000	cfu	spores	0.3	1.5	0.3	mg/kg	qd	5	vancomycin	0.3	acute	500	5000	125	mg	qid	10	antibiotic	vancomycin	no	therapeutic	all	adult,olderadult	phase3	0.808
https://pubmed.ncbi.nlm.nih.gov/24277020	2014	acute	n/a	goldensyrian	m	58	111	hamster		clindamycin+challenge	cumulativemortality	t	t	87	vpi10463	100000	cfu	spores	0.3	1.5	0.3	mg/kg	qd	5	vancomycin	0.3	sustained	500	5000	125	mg	qid	10	antibiotic	vancomycin	no	therapeutic	all	adult,olderadult	phase3	0.823529
https://pubmed.ncbi.nlm.nih.gov/24277020	2014	acute	n/a	goldensyrian	m	58	111	hamster		clindamycin+challenge	cumulativemortality	t	t	87	vpi10463	100000	cfu	spores	0.3	1.5	0.3	mg/kg	qd	5	vancomycin	0.3	acute	500	5000	125	mg	qid	10	antibiotic	vancomycin	no	therapeutic	all	adult,olderadult	phase3	0.80597
https://pubmed.ncbi.nlm.nih.gov/24277020	2014	acute	n/a	goldensyrian	m	58	111	hamster		clindamycin+challenge	cumulativemortality	t	t	87	vpi10463	100000	cfu	spores	0.3	1.5	0.3	mg/kg	qd	5	vancomycin	0.3	sustained	500	5000	125	mg	qid	10	antibiotic	vancomycin	no	therapeutic	all	adult,olderadult	phase3	0.757009
https://pubmed.ncbi.nlm.nih.gov/24277020	2014	acute	n/a	goldensyrian	m	58	111	hamster		clindamycin+challenge	cumulativemortality	t	t	87	vpi10463	100000	cfu	spores	0.3	1.5	0.3	mg/kg	qd	5	vancomycin	0.3	acute	500	5000	125	mg	qid	10	antibiotic	vancomycin	no	therapeutic	all	adult,olderadult	phase2	0.69697
https://pubmed.ncbi.nlm.nih.gov/24277020	2014	acute	n/a	goldensyrian	m	58	111	hamster		clindamycin+challenge	cumulativemortality	t	t	87	vpi10463	100000	cfu	spores	0.3	1.5	0.3	mg/kg	qd	5	vancomycin	0.3	sustained	500	5000	125	mg	qid	10	antibiotic	vancomycin	no	therapeutic	all	adult,olderadult	phase2	0.608696
https://pubmed.ncbi.nlm.nih.gov/24277020	2014	acute	n/a	goldensyrian	m	58	111	hamster		clindamycin+challenge	cumulativemortality	t	t	87	vpi10463	100000	cfu	spores	0.3	1.5	0.3	mg/kg	qd	5	vancomycin	0.3	acute	500	5000	125	mg	qid	10	antibiotic	vancomycin	no	therapeutic	all	adult,olderadult	phase4	0.666667
https://pubmed.ncbi.nlm.nih.gov/24277020	2014	acute	n/a	goldensyrian	m	58	111	hamster		clindamycin+challenge	cumulativemortality	t	t	87	vpi10463	100000	cfu	spores	0.3	1.5	0.3	mg/kg	qd	5	vancomycin	0.3	acute	500	5000	125	mg	qid	10	antibiotic	vancomycin	no	therapeutic	all	adult,olderadult	phase4	1
https://pubmed.ncbi.nlm.nih.gov/24277020	2014	acute	n/a	goldensyrian	m	58	111	hamster		clindamycin+challenge	cumulativemortality	t	t	87	vpi10463	100000	cfu	spores	0.3	1.5	0.3	mg/kg	qd	5	vancomycin	0.3	sustained							control	vancomycin	no	therapeutic	all	adult,olderadult	phase3	0.740741
https://pubmed.ncbi.nlm.nih.gov/24277020	2014	acute	n/a	goldensyrian	m	58	111	hamster		clindamycin+challenge	cumulativemortality	t	t	87	vpi10463	100000	cfu	spores	0.3	1.5	0.3	mg/kg	qd	5	vancomycin	0.3	sustained							antibiotic	vancomycin	no	therapeutic	all	adult,olderadult	phase3	0.721519
https://pubmed.ncbi.nlm.nih.gov/24277020	2014	acute	n/a	goldensyrian	m	58	111	hamster		clindamycin+challenge	cumulativemortality	t	t	87	vpi10463	100000	cfu	spores	0.3	1.5	0.3	mg/kg	qd	5	vancomycin	0.3	sustained							antibiotic	vancomycin	no	therapeutic	all	adult,olderadult	phase2	0.263158
https://pubmed.ncbi.nlm.nih.gov/24277020	2014	acute	n/a	goldensyrian	m	58	111	hamster		clindamycin+challenge	cumulativemortality	t	t	87	vpi10463	100000	cfu	spores	0.3	1.5	0.3	mg/kg	qd	5	vancomycin	0.3	acute							antibiotic	vancomycin	no	therapeutic	all	adult,olderadult	phase2	0.306667
https://pubmed.ncbi.nlm.nih.gov/24277020	2014	acute	n/a	goldensyrian	m	58	111	hamster		clindamycin+challenge	cumulativemortality	t	t	87	vpi10463	100000	cfu	spores	0.3	1.5	0.3	mg/kg	qd	5	vancomycin	0.3	sustained							antibiotic	vancomycin	no	therapeutic	all	adult,olderadult	phase2	0.306667
https://pubmed.ncbi.nlm.nih.gov/24277020	2014	acute	n/a	goldensyrian	m	58	111	hamster		clindamycin+challenge	cumulativemortality	t	t	87	vpi10463	100000	cfu	spores	12.5	62.5	12.5	mg/kg	qd	5	vancomycin	1	acute	500	5000	125	mg	qid	10	antibiotic	vancomycin	yes	therapeutic	all	adult,olderadult	phase2	0.893939
https://pubmed.ncbi.nlm.nih.gov/24277020	2014	acute	n/a	goldensyrian	m	58	111	hamster		clindamycin+challenge	cumulativemortality	t	t	87	vpi10463	100000	cfu	spores	12.5	62.5	12.5	mg/kg	qd	5	vancomycin	1	sustained	500	5000	125	mg	qid	10	antibiotic	vancomycin	yes	therapeutic	all	adult,olderadult	phase2	0.644068
https://pubmed.ncbi.nlm.nih.gov/24277020	2014	acute	n/a	goldensyrian	m	58	111	hamster		clindamycin+challenge	cumulativemortality	t	t	87	vpi10463	100000	cfu	spores	12.5	62.5	12.5	mg/kg	qd	5	vancomycin	1	sustained	125		125	mg	qd		antibiotic	vancomycin	no	prophylactic	all	olderadult	phase4	1
https://pubmed.ncbi.nlm.nih.gov/24277020	2014	acute	n/a	goldensyrian	m	58	111	hamster		clindamycin+challenge	cumulativemortality	t	t	87	vpi10463	100000	cfu	spores	12.5	62.5	12.5	mg/kg	qd	5	vancomycin	1	acute	500	5000	125	mg	qid	10	antibiotic	vancomycin	no	therapeutic	all	adult,olderadult	phase3	0.853821
https://pubmed.ncbi.nlm.nih.gov/24277020	2014	acute	n/a	goldensyrian	m	58	111	hamster		clindamycin+challenge	cumulativemortality	t	t	87	vpi10463	100000	cfu	spores	12.5	62.5	12.5	mg/kg	qd	5	vancomycin	1	sustained	500	5000	125	mg	qid	10	antibiotic	vancomycin	no	therapeutic	all	adult,olderadult	phase3	0.61794
https://pubmed.ncbi.nlm.nih.gov/24277020	2014	acute	n/a	goldensyrian	m	58	111	hamster		clindamycin+challenge	cumulativemortality	t	t	87	vpi10463	100000	cfu	spores	12.5	62.5	12.5	mg/kg	qd	5	vancomycin	1	acute	500	5000	125	mg	qid	10	antibiotic	vancomycin	no	therapeutic	all	adult,olderadult	phase3	0.849057
https://pubmed.ncbi.nlm.nih.gov/24277020	2014	acute	n/a	goldensyrian	m	58	111	hamster		clindamycin+challenge	cumulativemortality	t	t	87	vpi10463	100000	cfu	spores	12.5	62.5	12.5	mg/kg	qd	5	vancomycin	1	sustained	500	5000	125	mg	qid	10	antibiotic	vancomycin	no	therapeutic	all	adult,olderadult	phase3	0.622642
https://pubmed.ncbi.nlm.nih.gov/24277020	2014	acute	n/a	goldensyrian	m	58	111	hamster		clindamycin+challenge	cumulativemortality	t	t	87	vpi10463	100000	cfu	spores	12.5	62.5	12.5	mg/kg	qd	5	vancomycin	1	acute	500	5000	125	mg	qid	10	antibiotic	vancomycin	no	therapeutic	all	adult,olderadult	phase4	0.821229
https://pubmed.ncbi.nlm.nih.gov/24277020	2014	acute	n/a	goldensyrian	m	58	111	hamster		clindamycin+challenge	cumulativemortality	t	t	87	vpi10463	100000	cfu	spores	12.5	62.5	12.5	mg/kg	qd	5	vancomycin	1	sustained	500	5000	125	mg	qid	10	antibiotic	vancomycin	no	therapeutic	all	adult,olderadult	phase4	0.592179
https://pubmed.ncbi.nlm.nih.gov/24277020	2014	acute	n/a	goldensyrian	m	58	111	hamster		clindamycin+challenge	cumulativemortality	t	t	87	vpi10463	100000	cfu	spores	12.5	62.5	12.5	mg/kg	qd	5	vancomycin	1	acute	500	5000	125	mg	qid	10	antibiotic	vancomycin	no	therapeutic	all	adult,olderadult	phase3	0.835714
https://pubmed.ncbi.nlm.nih.gov/24277020	2014	acute	n/a	goldensyrian	m	58	111	hamster		clindamycin+challenge	cumulativemortality	t	t	87	vpi10463	100000	cfu	spores	12.5	62.5	12.5	mg/kg	qd	5	vancomycin	1	sustained	500	5000	125	mg	qid	10	antibiotic	vancomycin	no	therapeutic	all	adult,olderadult	phase3	0.610714
https://pubmed.ncbi.nlm.nih.gov/24277020	2014	acute	n/a	goldensyrian	m	58	111	hamster		clindamycin+challenge	cumulativemortality	t	t	87	vpi10463	100000	cfu	spores	12.5	62.5	12.5	mg/kg	qd	5	vancomycin	1	acute	500	5000	125	mg	qid	10	antibiotic	vancomycin	no	therapeutic	all	adult,olderadult	phase3	0.818493
https://pubmed.ncbi.nlm.nih.gov/24277020	2014	acute	n/a	goldensyrian	m	58	111	hamster		clindamycin+challenge	cumulativemortality	t	t	87	vpi10463	100000	cfu	spores	12.5	62.5	12.5	mg/kg	qd	5	vancomycin	1	sustained	500	5000	125	mg	qid	10	antibiotic	vancomycin	no	therapeutic	all	adult,olderadult	phase3	0.589041
https://pubmed.ncbi.nlm.nih.gov/24277020	2014	acute	n/a	goldensyrian	m	58	111	hamster		clindamycin+challenge	cumulativemortality	t	t	87	vpi10463	100000	cfu	spores	12.5	62.5	12.5	mg/kg	qd	5	vancomycin	1	acute	500	5000	125	mg	qid	10	antibiotic	vancomycin	no	therapeutic	all	adult,olderadult	phase3	0.87963
https://pubmed.ncbi.nlm.nih.gov/24277020	2014	acute	n/a	goldensyrian	m	58	111	hamster		clindamycin+challenge	cumulativemortality	t	t	87	vpi10463	100000	cfu	spores	12.5	62.5	12.5	mg/kg	qd	5	vancomycin	1	sustained	500	5000	125	mg	qid	10	antibiotic	vancomycin	no	therapeutic	all	adult,olderadult	phase3	0.657407
https://pubmed.ncbi.nlm.nih.gov/24277020	2014	acute	n/a	goldensyrian	m	58	111	hamster		clindamycin+challenge	cumulativemortality	t	t	87	vpi10463	100000	cfu	spores	12.5	62.5	12.5	mg/kg	qd	5	vancomycin	1	acute	500	5000	125	mg	qid	10	antibiotic	vancomycin	no	therapeutic	all	adult,olderadult	phase3	0.1875
https://pubmed.ncbi.nlm.nih.gov/24277020	2014	acute	n/a	goldensyrian	m	58	111	hamster		clindamycin+challenge	cumulativemortality	t	t	87	vpi10463	100000	cfu	spores	12.5	62.5	12.5	mg/kg	qd	5	vancomycin	1	sustained	500	5000	125	mg	qid	10	antibiotic	vancomycin	no	therapeutic	all	adult,olderadult	phase3	0.3125
https://pubmed.ncbi.nlm.nih.gov/24277020	2014	acute	n/a	goldensyrian	m	58	111	hamster		clindamycin+challenge	cumulativemortality	t	t	87	vpi10463	100000	cfu	spores	12.5	62.5	12.5	mg/kg	qd	5	vancomycin	1	acute	500	5000	125	mg	qid	10	antibiotic	vancomycin	yes	therapeutic	all	adult,olderadult	phase2	0.863636
https://pubmed.ncbi.nlm.nih.gov/24277020	2014	acute	n/a	goldensyrian	m	58	111	hamster		clindamycin+challenge	cumulativemortality	t	t	87	vpi10463	100000	cfu	spores	12.5	62.5	12.5	mg/kg	qd	5	vancomycin	1	sustained	500	5000	125	mg	qid	10	antibiotic	vancomycin	yes	therapeutic	all	adult,olderadult	phase2	0.545455
https://pubmed.ncbi.nlm.nih.gov/24277020	2014	acute	n/a	goldensyrian	m	58	111	hamster		clindamycin+challenge	cumulativemortality	t	t	87	vpi10463	100000	cfu	spores	12.5	62.5	12.5	mg/kg	qd	5	vancomycin	1	acute	500	5000	125	mg	qid	10	antibiotic	vancomycin	no	therapeutic	all	child	phase3	0.704545
https://pubmed.ncbi.nlm.nih.gov/24277020	2014	acute	n/a	goldensyrian	m	58	111	hamster		clindamycin+challenge	cumulativemortality	t	t	87	vpi10463	100000	cfu	spores	12.5	62.5	12.5	mg/kg	qd	5	vancomycin	1	sustained	500	5000	125	mg	qid	10	antibiotic	vancomycin	no	therapeutic	all	child	phase3	0.741935
https://pubmed.ncbi.nlm.nih.gov/24277020	2014	acute	n/a	goldensyrian	m	58	111	hamster		clindamycin+challenge	cumulativemortality	t	t	87	vpi10463	100000	cfu	spores	12.5	62.5	12.5	mg/kg	qd	5	vancomycin	1	acute	500	5000	125	mg	qid	10	antibiotic	vancomycin	no	therapeutic	all	child,adult,olderadult	phase3	0.863281
https://pubmed.ncbi.nlm.nih.gov/24277020	2014	acute	n/a	goldensyrian	m	58	111	hamster		clindamycin+challenge	cumulativemortality	t	t	87	vpi10463	100000	cfu	spores	12.5	62.5	12.5	mg/kg	qd	5	vancomycin	1	sustained	500	5000	125	mg	qid	10	antibiotic	vancomycin	no	therapeutic	all	child,adult,olderadult	phase3	0.779279
https://pubmed.ncbi.nlm.nih.gov/24277020	2014	acute	n/a	goldensyrian	m	58	111	hamster		clindamycin+challenge	cumulativemortality	t	t	87	vpi10463	100000	cfu	spores	12.5	62.5	12.5	mg/kg	qd	5	vancomycin	1	acute	500	5000	125	mg	qid	10	antibiotic	vancomycin	no	therapeutic	all	child,adult,olderadult	phase3	0.856678
https://pubmed.ncbi.nlm.nih.gov/24277020	2014	acute	n/a	goldensyrian	m	58	111	hamster		clindamycin+challenge	cumulativemortality	t	t	87	vpi10463	100000	cfu	spores	12.5	62.5	12.5	mg/kg	qd	5	vancomycin	1	sustained	500	5000	125	mg	qid	10	antibiotic	vancomycin	no	therapeutic	all	child,adult,olderadult	phase3	0.745247
https://pubmed.ncbi.nlm.nih.gov/24277020	2014	acute	n/a	goldensyrian	m	58	111	hamster		clindamycin+challenge	cumulativemortality	t	t	87	vpi10463	100000	cfu	spores	12.5	62.5	12.5	mg/kg	qd	5	vancomycin	1	acute	500	5000	125	mg	qid	10	antibiotic	vancomycin	no	therapeutic	all	adult,olderadult	phase3	0.634783
https://pubmed.ncbi.nlm.nih.gov/24277020	2014	acute	n/a	goldensyrian	m	58	111	hamster		clindamycin+challenge	cumulativemortality	t	t	87	vpi10463	100000	cfu	spores	12.5	62.5	12.5	mg/kg	qd	5	vancomycin	1	sustained	500	5000	125	mg	qid	10	antibiotic	vancomycin	no	therapeutic	all	adult,olderadult	phase3	0.863014
https://pubmed.ncbi.nlm.nih.gov/24277020	2014	acute	n/a	goldensyrian	m	58	111	hamster		clindamycin+challenge	cumulativemortality	t	t	87	vpi10463	100000	cfu	spores	12.5	62.5	12.5	mg/kg	qd	5	vancomycin	1	acute	500	5000	125	mg	qid	10	antibiotic	vancomycin	no	therapeutic	all	adult,olderadult	phase3	0.808
https://pubmed.ncbi.nlm.nih.gov/24277020	2014	acute	n/a	goldensyrian	m	58	111	hamster		clindamycin+challenge	cumulativemortality	t	t	87	vpi10463	100000	cfu	spores	12.5	62.5	12.5	mg/kg	qd	5	vancomycin	1	sustained	500	5000	125	mg	qid	10	antibiotic	vancomycin	no	therapeutic	all	adult,olderadult	phase3	0.823529
https://pubmed.ncbi.nlm.nih.gov/24277020	2014	acute	n/a	goldensyrian	m	58	111	hamster		clindamycin+challenge	cumulativemortality	t	t	87	vpi10463	100000	cfu	spores	12.5	62.5	12.5	mg/kg	qd	5	vancomycin	1	acute	500	5000	125	mg	qid	10	antibiotic	vancomycin	no	therapeutic	all	adult,olderadult	phase3	0.80597
https://pubmed.ncbi.nlm.nih.gov/24277020	2014	acute	n/a	goldensyrian	m	58	111	hamster		clindamycin+challenge	cumulativemortality	t	t	87	vpi10463	100000	cfu	spores	12.5	62.5	12.5	mg/kg	qd	5	vancomycin	1	sustained	500	5000	125	mg	qid	10	antibiotic	vancomycin	no	therapeutic	all	adult,olderadult	phase3	0.757009
https://pubmed.ncbi.nlm.nih.gov/24277020	2014	acute	n/a	goldensyrian	m	58	111	hamster		clindamycin+challenge	cumulativemortality	t	t	87	vpi10463	100000	cfu	spores	12.5	62.5	12.5	mg/kg	qd	5	vancomycin	1	acute	500	5000	125	mg	qid	10	antibiotic	vancomycin	no	therapeutic	all	adult,olderadult	phase2	0.69697
https://pubmed.ncbi.nlm.nih.gov/24277020	2014	acute	n/a	goldensyrian	m	58	111	hamster		clindamycin+challenge	cumulativemortality	t	t	87	vpi10463	100000	cfu	spores	12.5	62.5	12.5	mg/kg	qd	5	vancomycin	1	sustained	500	5000	125	mg	qid	10	antibiotic	vancomycin	no	therapeutic	all	adult,olderadult	phase2	0.608696
https://pubmed.ncbi.nlm.nih.gov/24277020	2014	acute	n/a	goldensyrian	m	58	111	hamster		clindamycin+challenge	cumulativemortality	t	t	87	vpi10463	100000	cfu	spores	12.5	62.5	12.5	mg/kg	qd	5	vancomycin	1	acute	500	5000	125	mg	qid	10	antibiotic	vancomycin	no	therapeutic	all	adult,olderadult	phase4	0.666667
https://pubmed.ncbi.nlm.nih.gov/24277020	2014	acute	n/a	goldensyrian	m	58	111	hamster		clindamycin+challenge	cumulativemortality	t	t	87	vpi10463	100000	cfu	spores	12.5	62.5	12.5	mg/kg	qd	5	vancomycin	1	acute	500	5000	125	mg	qid	10	antibiotic	vancomycin	no	therapeutic	all	adult,olderadult	phase4	1
https://pubmed.ncbi.nlm.nih.gov/24277020	2014	acute	n/a	goldensyrian	m	58	111	hamster		clindamycin+challenge	cumulativemortality	t	t	87	vpi10463	100000	cfu	spores	12.5	62.5	12.5	mg/kg	qd	5	vancomycin	1	sustained							control	vancomycin	no	therapeutic	all	adult,olderadult	phase3	0.740741
https://pubmed.ncbi.nlm.nih.gov/24277020	2014	acute	n/a	goldensyrian	m	58	111	hamster		clindamycin+challenge	cumulativemortality	t	t	87	vpi10463	100000	cfu	spores	12.5	62.5	12.5	mg/kg	qd	5	vancomycin	1	sustained							antibiotic	vancomycin	no	therapeutic	all	adult,olderadult	phase3	0.721519
https://pubmed.ncbi.nlm.nih.gov/24277020	2014	acute	n/a	goldensyrian	m	58	111	hamster		clindamycin+challenge	cumulativemortality	t	t	87	vpi10463	100000	cfu	spores	12.5	62.5	12.5	mg/kg	qd	5	vancomycin	1	sustained							antibiotic	vancomycin	no	therapeutic	all	adult,olderadult	phase2	0.263158
https://pubmed.ncbi.nlm.nih.gov/24277020	2014	acute	n/a	goldensyrian	m	58	111	hamster		clindamycin+challenge	cumulativemortality	t	t	87	vpi10463	100000	cfu	spores	12.5	62.5	12.5	mg/kg	qd	5	vancomycin	1	acute							antibiotic	vancomycin	no	therapeutic	all	adult,olderadult	phase2	0.306667
https://pubmed.ncbi.nlm.nih.gov/24277020	2014	acute	n/a	goldensyrian	m	58	111	hamster		clindamycin+challenge	cumulativemortality	t	t	87	vpi10463	100000	cfu	spores	12.5	62.5	12.5	mg/kg	qd	5	vancomycin	1	sustained							antibiotic	vancomycin	no	therapeutic	all	adult,olderadult	phase2	0.306667
https://pubmed.ncbi.nlm.nih.gov/24277020	2014	acute	n/a	goldensyrian	m	58	111	hamster		clindamycin+challenge	cumulativemortality	t	t	87	vpi10463	100000	cfu	spores	25	125	25	mg/kg	qd	5	vancomycin	1	acute	500	5000	125	mg	qid	10	antibiotic	vancomycin	yes	therapeutic	all	adult,olderadult	phase2	0.893939
https://pubmed.ncbi.nlm.nih.gov/24277020	2014	acute	n/a	goldensyrian	m	58	111	hamster		clindamycin+challenge	cumulativemortality	t	t	87	vpi10463	100000	cfu	spores	25	125	25	mg/kg	qd	5	vancomycin	1	sustained	500	5000	125	mg	qid	10	antibiotic	vancomycin	yes	therapeutic	all	adult,olderadult	phase2	0.644068
https://pubmed.ncbi.nlm.nih.gov/24277020	2014	acute	n/a	goldensyrian	m	58	111	hamster		clindamycin+challenge	cumulativemortality	t	t	87	vpi10463	100000	cfu	spores	25	125	25	mg/kg	qd	5	vancomycin	1	sustained	125		125	mg	qd		antibiotic	vancomycin	no	prophylactic	all	olderadult	phase4	1
https://pubmed.ncbi.nlm.nih.gov/24277020	2014	acute	n/a	goldensyrian	m	58	111	hamster		clindamycin+challenge	cumulativemortality	t	t	87	vpi10463	100000	cfu	spores	25	125	25	mg/kg	qd	5	vancomycin	1	acute	500	5000	125	mg	qid	10	antibiotic	vancomycin	no	therapeutic	all	adult,olderadult	phase3	0.853821
https://pubmed.ncbi.nlm.nih.gov/24277020	2014	acute	n/a	goldensyrian	m	58	111	hamster		clindamycin+challenge	cumulativemortality	t	t	87	vpi10463	100000	cfu	spores	25	125	25	mg/kg	qd	5	vancomycin	1	sustained	500	5000	125	mg	qid	10	antibiotic	vancomycin	no	therapeutic	all	adult,olderadult	phase3	0.61794
https://pubmed.ncbi.nlm.nih.gov/24277020	2014	acute	n/a	goldensyrian	m	58	111	hamster		clindamycin+challenge	cumulativemortality	t	t	87	vpi10463	100000	cfu	spores	25	125	25	mg/kg	qd	5	vancomycin	1	acute	500	5000	125	mg	qid	10	antibiotic	vancomycin	no	therapeutic	all	adult,olderadult	phase3	0.849057
https://pubmed.ncbi.nlm.nih.gov/24277020	2014	acute	n/a	goldensyrian	m	58	111	hamster		clindamycin+challenge	cumulativemortality	t	t	87	vpi10463	100000	cfu	spores	25	125	25	mg/kg	qd	5	vancomycin	1	sustained	500	5000	125	mg	qid	10	antibiotic	vancomycin	no	therapeutic	all	adult,olderadult	phase3	0.622642
https://pubmed.ncbi.nlm.nih.gov/24277020	2014	acute	n/a	goldensyrian	m	58	111	hamster		clindamycin+challenge	cumulativemortality	t	t	87	vpi10463	100000	cfu	spores	25	125	25	mg/kg	qd	5	vancomycin	1	acute	500	5000	125	mg	qid	10	antibiotic	vancomycin	no	therapeutic	all	adult,olderadult	phase4	0.821229
https://pubmed.ncbi.nlm.nih.gov/24277020	2014	acute	n/a	goldensyrian	m	58	111	hamster		clindamycin+challenge	cumulativemortality	t	t	87	vpi10463	100000	cfu	spores	25	125	25	mg/kg	qd	5	vancomycin	1	sustained	500	5000	125	mg	qid	10	antibiotic	vancomycin	no	therapeutic	all	adult,olderadult	phase4	0.592179
https://pubmed.ncbi.nlm.nih.gov/24277020	2014	acute	n/a	goldensyrian	m	58	111	hamster		clindamycin+challenge	cumulativemortality	t	t	87	vpi10463	100000	cfu	spores	25	125	25	mg/kg	qd	5	vancomycin	1	acute	500	5000	125	mg	qid	10	antibiotic	vancomycin	no	therapeutic	all	adult,olderadult	phase3	0.835714
https://pubmed.ncbi.nlm.nih.gov/24277020	2014	acute	n/a	goldensyrian	m	58	111	hamster		clindamycin+challenge	cumulativemortality	t	t	87	vpi10463	100000	cfu	spores	25	125	25	mg/kg	qd	5	vancomycin	1	sustained	500	5000	125	mg	qid	10	antibiotic	vancomycin	no	therapeutic	all	adult,olderadult	phase3	0.610714
https://pubmed.ncbi.nlm.nih.gov/24277020	2014	acute	n/a	goldensyrian	m	58	111	hamster		clindamycin+challenge	cumulativemortality	t	t	87	vpi10463	100000	cfu	spores	25	125	25	mg/kg	qd	5	vancomycin	1	acute	500	5000	125	mg	qid	10	antibiotic	vancomycin	no	therapeutic	all	adult,olderadult	phase3	0.818493
https://pubmed.ncbi.nlm.nih.gov/24277020	2014	acute	n/a	goldensyrian	m	58	111	hamster		clindamycin+challenge	cumulativemortality	t	t	87	vpi10463	100000	cfu	spores	25	125	25	mg/kg	qd	5	vancomycin	1	sustained	500	5000	125	mg	qid	10	antibiotic	vancomycin	no	therapeutic	all	adult,olderadult	phase3	0.589041
https://pubmed.ncbi.nlm.nih.gov/24277020	2014	acute	n/a	goldensyrian	m	58	111	hamster		clindamycin+challenge	cumulativemortality	t	t	87	vpi10463	100000	cfu	spores	25	125	25	mg/kg	qd	5	vancomycin	1	acute	500	5000	125	mg	qid	10	antibiotic	vancomycin	no	therapeutic	all	adult,olderadult	phase3	0.87963
https://pubmed.ncbi.nlm.nih.gov/24277020	2014	acute	n/a	goldensyrian	m	58	111	hamster		clindamycin+challenge	cumulativemortality	t	t	87	vpi10463	100000	cfu	spores	25	125	25	mg/kg	qd	5	vancomycin	1	sustained	500	5000	125	mg	qid	10	antibiotic	vancomycin	no	therapeutic	all	adult,olderadult	phase3	0.657407
https://pubmed.ncbi.nlm.nih.gov/24277020	2014	acute	n/a	goldensyrian	m	58	111	hamster		clindamycin+challenge	cumulativemortality	t	t	87	vpi10463	100000	cfu	spores	25	125	25	mg/kg	qd	5	vancomycin	1	acute	500	5000	125	mg	qid	10	antibiotic	vancomycin	no	therapeutic	all	adult,olderadult	phase3	0.1875
https://pubmed.ncbi.nlm.nih.gov/24277020	2014	acute	n/a	goldensyrian	m	58	111	hamster		clindamycin+challenge	cumulativemortality	t	t	87	vpi10463	100000	cfu	spores	25	125	25	mg/kg	qd	5	vancomycin	1	sustained	500	5000	125	mg	qid	10	antibiotic	vancomycin	no	therapeutic	all	adult,olderadult	phase3	0.3125
https://pubmed.ncbi.nlm.nih.gov/24277020	2014	acute	n/a	goldensyrian	m	58	111	hamster		clindamycin+challenge	cumulativemortality	t	t	87	vpi10463	100000	cfu	spores	25	125	25	mg/kg	qd	5	vancomycin	1	acute	500	5000	125	mg	qid	10	antibiotic	vancomycin	yes	therapeutic	all	adult,olderadult	phase2	0.863636
https://pubmed.ncbi.nlm.nih.gov/24277020	2014	acute	n/a	goldensyrian	m	58	111	hamster		clindamycin+challenge	cumulativemortality	t	t	87	vpi10463	100000	cfu	spores	25	125	25	mg/kg	qd	5	vancomycin	1	sustained	500	5000	125	mg	qid	10	antibiotic	vancomycin	yes	therapeutic	all	adult,olderadult	phase2	0.545455
https://pubmed.ncbi.nlm.nih.gov/24277020	2014	acute	n/a	goldensyrian	m	58	111	hamster		clindamycin+challenge	cumulativemortality	t	t	87	vpi10463	100000	cfu	spores	25	125	25	mg/kg	qd	5	vancomycin	1	acute	500	5000	125	mg	qid	10	antibiotic	vancomycin	no	therapeutic	all	child	phase3	0.704545
https://pubmed.ncbi.nlm.nih.gov/24277020	2014	acute	n/a	goldensyrian	m	58	111	hamster		clindamycin+challenge	cumulativemortality	t	t	87	vpi10463	100000	cfu	spores	25	125	25	mg/kg	qd	5	vancomycin	1	sustained	500	5000	125	mg	qid	10	antibiotic	vancomycin	no	therapeutic	all	child	phase3	0.741935
https://pubmed.ncbi.nlm.nih.gov/24277020	2014	acute	n/a	goldensyrian	m	58	111	hamster		clindamycin+challenge	cumulativemortality	t	t	87	vpi10463	100000	cfu	spores	25	125	25	mg/kg	qd	5	vancomycin	1	acute	500	5000	125	mg	qid	10	antibiotic	vancomycin	no	therapeutic	all	child,adult,olderadult	phase3	0.863281
https://pubmed.ncbi.nlm.nih.gov/24277020	2014	acute	n/a	goldensyrian	m	58	111	hamster		clindamycin+challenge	cumulativemortality	t	t	87	vpi10463	100000	cfu	spores	25	125	25	mg/kg	qd	5	vancomycin	1	sustained	500	5000	125	mg	qid	10	antibiotic	vancomycin	no	therapeutic	all	child,adult,olderadult	phase3	0.779279
https://pubmed.ncbi.nlm.nih.gov/24277020	2014	acute	n/a	goldensyrian	m	58	111	hamster		clindamycin+challenge	cumulativemortality	t	t	87	vpi10463	100000	cfu	spores	25	125	25	mg/kg	qd	5	vancomycin	1	acute	500	5000	125	mg	qid	10	antibiotic	vancomycin	no	therapeutic	all	child,adult,olderadult	phase3	0.856678
https://pubmed.ncbi.nlm.nih.gov/24277020	2014	acute	n/a	goldensyrian	m	58	111	hamster		clindamycin+challenge	cumulativemortality	t	t	87	vpi10463	100000	cfu	spores	25	125	25	mg/kg	qd	5	vancomycin	1	sustained	500	5000	125	mg	qid	10	antibiotic	vancomycin	no	therapeutic	all	child,adult,olderadult	phase3	0.745247
https://pubmed.ncbi.nlm.nih.gov/24277020	2014	acute	n/a	goldensyrian	m	58	111	hamster		clindamycin+challenge	cumulativemortality	t	t	87	vpi10463	100000	cfu	spores	25	125	25	mg/kg	qd	5	vancomycin	1	acute	500	5000	125	mg	qid	10	antibiotic	vancomycin	no	therapeutic	all	adult,olderadult	phase3	0.634783
https://pubmed.ncbi.nlm.nih.gov/24277020	2014	acute	n/a	goldensyrian	m	58	111	hamster		clindamycin+challenge	cumulativemortality	t	t	87	vpi10463	100000	cfu	spores	25	125	25	mg/kg	qd	5	vancomycin	1	sustained	500	5000	125	mg	qid	10	antibiotic	vancomycin	no	therapeutic	all	adult,olderadult	phase3	0.863014
https://pubmed.ncbi.nlm.nih.gov/24277020	2014	acute	n/a	goldensyrian	m	58	111	hamster		clindamycin+challenge	cumulativemortality	t	t	87	vpi10463	100000	cfu	spores	25	125	25	mg/kg	qd	5	vancomycin	1	acute	500	5000	125	mg	qid	10	antibiotic	vancomycin	no	therapeutic	all	adult,olderadult	phase3	0.808
https://pubmed.ncbi.nlm.nih.gov/24277020	2014	acute	n/a	goldensyrian	m	58	111	hamster		clindamycin+challenge	cumulativemortality	t	t	87	vpi10463	100000	cfu	spores	25	125	25	mg/kg	qd	5	vancomycin	1	sustained	500	5000	125	mg	qid	10	antibiotic	vancomycin	no	therapeutic	all	adult,olderadult	phase3	0.823529
https://pubmed.ncbi.nlm.nih.gov/24277020	2014	acute	n/a	goldensyrian	m	58	111	hamster		clindamycin+challenge	cumulativemortality	t	t	87	vpi10463	100000	cfu	spores	25	125	25	mg/kg	qd	5	vancomycin	1	acute	500	5000	125	mg	qid	10	antibiotic	vancomycin	no	therapeutic	all	adult,olderadult	phase3	0.80597
https://pubmed.ncbi.nlm.nih.gov/24277020	2014	acute	n/a	goldensyrian	m	58	111	hamster		clindamycin+challenge	cumulativemortality	t	t	87	vpi10463	100000	cfu	spores	25	125	25	mg/kg	qd	5	vancomycin	1	sustained	500	5000	125	mg	qid	10	antibiotic	vancomycin	no	therapeutic	all	adult,olderadult	phase3	0.757009
https://pubmed.ncbi.nlm.nih.gov/24277020	2014	acute	n/a	goldensyrian	m	58	111	hamster		clindamycin+challenge	cumulativemortality	t	t	87	vpi10463	100000	cfu	spores	25	125	25	mg/kg	qd	5	vancomycin	1	acute	500	5000	125	mg	qid	10	antibiotic	vancomycin	no	therapeutic	all	adult,olderadult	phase2	0.69697
https://pubmed.ncbi.nlm.nih.gov/24277020	2014	acute	n/a	goldensyrian	m	58	111	hamster		clindamycin+challenge	cumulativemortality	t	t	87	vpi10463	100000	cfu	spores	25	125	25	mg/kg	qd	5	vancomycin	1	sustained	500	5000	125	mg	qid	10	antibiotic	vancomycin	no	therapeutic	all	adult,olderadult	phase2	0.608696
https://pubmed.ncbi.nlm.nih.gov/24277020	2014	acute	n/a	goldensyrian	m	58	111	hamster		clindamycin+challenge	cumulativemortality	t	t	87	vpi10463	100000	cfu	spores	25	125	25	mg/kg	qd	5	vancomycin	1	acute	500	5000	125	mg	qid	10	antibiotic	vancomycin	no	therapeutic	all	adult,olderadult	phase4	0.666667
https://pubmed.ncbi.nlm.nih.gov/24277020	2014	acute	n/a	goldensyrian	m	58	111	hamster		clindamycin+challenge	cumulativemortality	t	t	87	vpi10463	100000	cfu	spores	25	125	25	mg/kg	qd	5	vancomycin	1	acute	500	5000	125	mg	qid	10	antibiotic	vancomycin	no	therapeutic	all	adult,olderadult	phase4	1
https://pubmed.ncbi.nlm.nih.gov/24277020	2014	acute	n/a	goldensyrian	m	58	111	hamster		clindamycin+challenge	cumulativemortality	t	t	87	vpi10463	100000	cfu	spores	25	125	25	mg/kg	qd	5	vancomycin	1	sustained							control	vancomycin	no	therapeutic	all	adult,olderadult	phase3	0.740741
https://pubmed.ncbi.nlm.nih.gov/24277020	2014	acute	n/a	goldensyrian	m	58	111	hamster		clindamycin+challenge	cumulativemortality	t	t	87	vpi10463	100000	cfu	spores	25	125	25	mg/kg	qd	5	vancomycin	1	sustained							antibiotic	vancomycin	no	therapeutic	all	adult,olderadult	phase3	0.721519
https://pubmed.ncbi.nlm.nih.gov/24277020	2014	acute	n/a	goldensyrian	m	58	111	hamster		clindamycin+challenge	cumulativemortality	t	t	87	vpi10463	100000	cfu	spores	25	125	25	mg/kg	qd	5	vancomycin	1	sustained							antibiotic	vancomycin	no	therapeutic	all	adult,olderadult	phase2	0.263158
https://pubmed.ncbi.nlm.nih.gov/24277020	2014	acute	n/a	goldensyrian	m	58	111	hamster		clindamycin+challenge	cumulativemortality	t	t	87	vpi10463	100000	cfu	spores	25	125	25	mg/kg	qd	5	vancomycin	1	acute							antibiotic	vancomycin	no	therapeutic	all	adult,olderadult	phase2	0.306667
https://pubmed.ncbi.nlm.nih.gov/24277020	2014	acute	n/a	goldensyrian	m	58	111	hamster		clindamycin+challenge	cumulativemortality	t	t	87	vpi10463	100000	cfu	spores	25	125	25	mg/kg	qd	5	vancomycin	1	sustained							antibiotic	vancomycin	no	therapeutic	all	adult,olderadult	phase2	0.306667
https://pubmed.ncbi.nlm.nih.gov/24277020	2014	acute	n/a	goldensyrian	m	58	111	hamster		clindamycin+challenge	cumulativemortality	t	t	87	vpi10463	100000	cfu	spores	3	15	3	mg/kg	qd	5	vancomycin	1	acute	500	5000	125	mg	qid	10	antibiotic	vancomycin	yes	therapeutic	all	adult,olderadult	phase2	0.893939
https://pubmed.ncbi.nlm.nih.gov/24277020	2014	acute	n/a	goldensyrian	m	58	111	hamster		clindamycin+challenge	cumulativemortality	t	t	87	vpi10463	100000	cfu	spores	3	15	3	mg/kg	qd	5	vancomycin	1	sustained	500	5000	125	mg	qid	10	antibiotic	vancomycin	yes	therapeutic	all	adult,olderadult	phase2	0.644068
https://pubmed.ncbi.nlm.nih.gov/24277020	2014	acute	n/a	goldensyrian	m	58	111	hamster		clindamycin+challenge	cumulativemortality	t	t	87	vpi10463	100000	cfu	spores	3	15	3	mg/kg	qd	5	vancomycin	1	sustained	125		125	mg	qd		antibiotic	vancomycin	no	prophylactic	all	olderadult	phase4	1
https://pubmed.ncbi.nlm.nih.gov/24277020	2014	acute	n/a	goldensyrian	m	58	111	hamster		clindamycin+challenge	cumulativemortality	t	t	87	vpi10463	100000	cfu	spores	3	15	3	mg/kg	qd	5	vancomycin	1	acute	500	5000	125	mg	qid	10	antibiotic	vancomycin	no	therapeutic	all	adult,olderadult	phase3	0.853821
https://pubmed.ncbi.nlm.nih.gov/24277020	2014	acute	n/a	goldensyrian	m	58	111	hamster		clindamycin+challenge	cumulativemortality	t	t	87	vpi10463	100000	cfu	spores	3	15	3	mg/kg	qd	5	vancomycin	1	sustained	500	5000	125	mg	qid	10	antibiotic	vancomycin	no	therapeutic	all	adult,olderadult	phase3	0.61794
https://pubmed.ncbi.nlm.nih.gov/24277020	2014	acute	n/a	goldensyrian	m	58	111	hamster		clindamycin+challenge	cumulativemortality	t	t	87	vpi10463	100000	cfu	spores	3	15	3	mg/kg	qd	5	vancomycin	1	acute	500	5000	125	mg	qid	10	antibiotic	vancomycin	no	therapeutic	all	adult,olderadult	phase3	0.849057
https://pubmed.ncbi.nlm.nih.gov/24277020	2014	acute	n/a	goldensyrian	m	58	111	hamster		clindamycin+challenge	cumulativemortality	t	t	87	vpi10463	100000	cfu	spores	3	15	3	mg/kg	qd	5	vancomycin	1	sustained	500	5000	125	mg	qid	10	antibiotic	vancomycin	no	therapeutic	all	adult,olderadult	phase3	0.622642
https://pubmed.ncbi.nlm.nih.gov/24277020	2014	acute	n/a	goldensyrian	m	58	111	hamster		clindamycin+challenge	cumulativemortality	t	t	87	vpi10463	100000	cfu	spores	3	15	3	mg/kg	qd	5	vancomycin	1	acute	500	5000	125	mg	qid	10	antibiotic	vancomycin	no	therapeutic	all	adult,olderadult	phase4	0.821229
https://pubmed.ncbi.nlm.nih.gov/24277020	2014	acute	n/a	goldensyrian	m	58	111	hamster		clindamycin+challenge	cumulativemortality	t	t	87	vpi10463	100000	cfu	spores	3	15	3	mg/kg	qd	5	vancomycin	1	sustained	500	5000	125	mg	qid	10	antibiotic	vancomycin	no	therapeutic	all	adult,olderadult	phase4	0.592179
https://pubmed.ncbi.nlm.nih.gov/24277020	2014	acute	n/a	goldensyrian	m	58	111	hamster		clindamycin+challenge	cumulativemortality	t	t	87	vpi10463	100000	cfu	spores	3	15	3	mg/kg	qd	5	vancomycin	1	acute	500	5000	125	mg	qid	10	antibiotic	vancomycin	no	therapeutic	all	adult,olderadult	phase3	0.835714
https://pubmed.ncbi.nlm.nih.gov/24277020	2014	acute	n/a	goldensyrian	m	58	111	hamster		clindamycin+challenge	cumulativemortality	t	t	87	vpi10463	100000	cfu	spores	3	15	3	mg/kg	qd	5	vancomycin	1	sustained	500	5000	125	mg	qid	10	antibiotic	vancomycin	no	therapeutic	all	adult,olderadult	phase3	0.610714
https://pubmed.ncbi.nlm.nih.gov/24277020	2014	acute	n/a	goldensyrian	m	58	111	hamster		clindamycin+challenge	cumulativemortality	t	t	87	vpi10463	100000	cfu	spores	3	15	3	mg/kg	qd	5	vancomycin	1	acute	500	5000	125	mg	qid	10	antibiotic	vancomycin	no	therapeutic	all	adult,olderadult	phase3	0.818493
https://pubmed.ncbi.nlm.nih.gov/24277020	2014	acute	n/a	goldensyrian	m	58	111	hamster		clindamycin+challenge	cumulativemortality	t	t	87	vpi10463	100000	cfu	spores	3	15	3	mg/kg	qd	5	vancomycin	1	sustained	500	5000	125	mg	qid	10	antibiotic	vancomycin	no	therapeutic	all	adult,olderadult	phase3	0.589041
https://pubmed.ncbi.nlm.nih.gov/24277020	2014	acute	n/a	goldensyrian	m	58	111	hamster		clindamycin+challenge	cumulativemortality	t	t	87	vpi10463	100000	cfu	spores	3	15	3	mg/kg	qd	5	vancomycin	1	acute	500	5000	125	mg	qid	10	antibiotic	vancomycin	no	therapeutic	all	adult,olderadult	phase3	0.87963
https://pubmed.ncbi.nlm.nih.gov/24277020	2014	acute	n/a	goldensyrian	m	58	111	hamster		clindamycin+challenge	cumulativemortality	t	t	87	vpi10463	100000	cfu	spores	3	15	3	mg/kg	qd	5	vancomycin	1	sustained	500	5000	125	mg	qid	10	antibiotic	vancomycin	no	therapeutic	all	adult,olderadult	phase3	0.657407
https://pubmed.ncbi.nlm.nih.gov/24277020	2014	acute	n/a	goldensyrian	m	58	111	hamster		clindamycin+challenge	cumulativemortality	t	t	87	vpi10463	100000	cfu	spores	3	15	3	mg/kg	qd	5	vancomycin	1	acute	500	5000	125	mg	qid	10	antibiotic	vancomycin	no	therapeutic	all	adult,olderadult	phase3	0.1875
https://pubmed.ncbi.nlm.nih.gov/24277020	2014	acute	n/a	goldensyrian	m	58	111	hamster		clindamycin+challenge	cumulativemortality	t	t	87	vpi10463	100000	cfu	spores	3	15	3	mg/kg	qd	5	vancomycin	1	sustained	500	5000	125	mg	qid	10	antibiotic	vancomycin	no	therapeutic	all	adult,olderadult	phase3	0.3125
https://pubmed.ncbi.nlm.nih.gov/24277020	2014	acute	n/a	goldensyrian	m	58	111	hamster		clindamycin+challenge	cumulativemortality	t	t	87	vpi10463	100000	cfu	spores	3	15	3	mg/kg	qd	5	vancomycin	1	acute	500	5000	125	mg	qid	10	antibiotic	vancomycin	yes	therapeutic	all	adult,olderadult	phase2	0.863636
https://pubmed.ncbi.nlm.nih.gov/24277020	2014	acute	n/a	goldensyrian	m	58	111	hamster		clindamycin+challenge	cumulativemortality	t	t	87	vpi10463	100000	cfu	spores	3	15	3	mg/kg	qd	5	vancomycin	1	sustained	500	5000	125	mg	qid	10	antibiotic	vancomycin	yes	therapeutic	all	adult,olderadult	phase2	0.545455
https://pubmed.ncbi.nlm.nih.gov/24277020	2014	acute	n/a	goldensyrian	m	58	111	hamster		clindamycin+challenge	cumulativemortality	t	t	87	vpi10463	100000	cfu	spores	3	15	3	mg/kg	qd	5	vancomycin	1	acute	500	5000	125	mg	qid	10	antibiotic	vancomycin	no	therapeutic	all	child	phase3	0.704545
https://pubmed.ncbi.nlm.nih.gov/24277020	2014	acute	n/a	goldensyrian	m	58	111	hamster		clindamycin+challenge	cumulativemortality	t	t	87	vpi10463	100000	cfu	spores	3	15	3	mg/kg	qd	5	vancomycin	1	sustained	500	5000	125	mg	qid	10	antibiotic	vancomycin	no	therapeutic	all	child	phase3	0.741935
https://pubmed.ncbi.nlm.nih.gov/24277020	2014	acute	n/a	goldensyrian	m	58	111	hamster		clindamycin+challenge	cumulativemortality	t	t	87	vpi10463	100000	cfu	spores	3	15	3	mg/kg	qd	5	vancomycin	1	acute	500	5000	125	mg	qid	10	antibiotic	vancomycin	no	therapeutic	all	child,adult,olderadult	phase3	0.863281
https://pubmed.ncbi.nlm.nih.gov/24277020	2014	acute	n/a	goldensyrian	m	58	111	hamster		clindamycin+challenge	cumulativemortality	t	t	87	vpi10463	100000	cfu	spores	3	15	3	mg/kg	qd	5	vancomycin	1	sustained	500	5000	125	mg	qid	10	antibiotic	vancomycin	no	therapeutic	all	child,adult,olderadult	phase3	0.779279
https://pubmed.ncbi.nlm.nih.gov/24277020	2014	acute	n/a	goldensyrian	m	58	111	hamster		clindamycin+challenge	cumulativemortality	t	t	87	vpi10463	100000	cfu	spores	3	15	3	mg/kg	qd	5	vancomycin	1	acute	500	5000	125	mg	qid	10	antibiotic	vancomycin	no	therapeutic	all	child,adult,olderadult	phase3	0.856678
https://pubmed.ncbi.nlm.nih.gov/24277020	2014	acute	n/a	goldensyrian	m	58	111	hamster		clindamycin+challenge	cumulativemortality	t	t	87	vpi10463	100000	cfu	spores	3	15	3	mg/kg	qd	5	vancomycin	1	sustained	500	5000	125	mg	qid	10	antibiotic	vancomycin	no	therapeutic	all	child,adult,olderadult	phase3	0.745247
https://pubmed.ncbi.nlm.nih.gov/24277020	2014	acute	n/a	goldensyrian	m	58	111	hamster		clindamycin+challenge	cumulativemortality	t	t	87	vpi10463	100000	cfu	spores	3	15	3	mg/kg	qd	5	vancomycin	1	acute	500	5000	125	mg	qid	10	antibiotic	vancomycin	no	therapeutic	all	adult,olderadult	phase3	0.634783
https://pubmed.ncbi.nlm.nih.gov/24277020	2014	acute	n/a	goldensyrian	m	58	111	hamster		clindamycin+challenge	cumulativemortality	t	t	87	vpi10463	100000	cfu	spores	3	15	3	mg/kg	qd	5	vancomycin	1	sustained	500	5000	125	mg	qid	10	antibiotic	vancomycin	no	therapeutic	all	adult,olderadult	phase3	0.863014
https://pubmed.ncbi.nlm.nih.gov/24277020	2014	acute	n/a	goldensyrian	m	58	111	hamster		clindamycin+challenge	cumulativemortality	t	t	87	vpi10463	100000	cfu	spores	3	15	3	mg/kg	qd	5	vancomycin	1	acute	500	5000	125	mg	qid	10	antibiotic	vancomycin	no	therapeutic	all	adult,olderadult	phase3	0.808
https://pubmed.ncbi.nlm.nih.gov/24277020	2014	acute	n/a	goldensyrian	m	58	111	hamster		clindamycin+challenge	cumulativemortality	t	t	87	vpi10463	100000	cfu	spores	3	15	3	mg/kg	qd	5	vancomycin	1	sustained	500	5000	125	mg	qid	10	antibiotic	vancomycin	no	therapeutic	all	adult,olderadult	phase3	0.823529
https://pubmed.ncbi.nlm.nih.gov/24277020	2014	acute	n/a	goldensyrian	m	58	111	hamster		clindamycin+challenge	cumulativemortality	t	t	87	vpi10463	100000	cfu	spores	3	15	3	mg/kg	qd	5	vancomycin	1	acute	500	5000	125	mg	qid	10	antibiotic	vancomycin	no	therapeutic	all	adult,olderadult	phase3	0.80597
https://pubmed.ncbi.nlm.nih.gov/24277020	2014	acute	n/a	goldensyrian	m	58	111	hamster		clindamycin+challenge	cumulativemortality	t	t	87	vpi10463	100000	cfu	spores	3	15	3	mg/kg	qd	5	vancomycin	1	sustained	500	5000	125	mg	qid	10	antibiotic	vancomycin	no	therapeutic	all	adult,olderadult	phase3	0.757009
https://pubmed.ncbi.nlm.nih.gov/24277020	2014	acute	n/a	goldensyrian	m	58	111	hamster		clindamycin+challenge	cumulativemortality	t	t	87	vpi10463	100000	cfu	spores	3	15	3	mg/kg	qd	5	vancomycin	1	acute	500	5000	125	mg	qid	10	antibiotic	vancomycin	no	therapeutic	all	adult,olderadult	phase2	0.69697
https://pubmed.ncbi.nlm.nih.gov/24277020	2014	acute	n/a	goldensyrian	m	58	111	hamster		clindamycin+challenge	cumulativemortality	t	t	87	vpi10463	100000	cfu	spores	3	15	3	mg/kg	qd	5	vancomycin	1	sustained	500	5000	125	mg	qid	10	antibiotic	vancomycin	no	therapeutic	all	adult,olderadult	phase2	0.608696
https://pubmed.ncbi.nlm.nih.gov/24277020	2014	acute	n/a	goldensyrian	m	58	111	hamster		clindamycin+challenge	cumulativemortality	t	t	87	vpi10463	100000	cfu	spores	3	15	3	mg/kg	qd	5	vancomycin	1	acute	500	5000	125	mg	qid	10	antibiotic	vancomycin	no	therapeutic	all	adult,olderadult	phase4	0.666667
https://pubmed.ncbi.nlm.nih.gov/24277020	2014	acute	n/a	goldensyrian	m	58	111	hamster		clindamycin+challenge	cumulativemortality	t	t	87	vpi10463	100000	cfu	spores	3	15	3	mg/kg	qd	5	vancomycin	1	acute	500	5000	125	mg	qid	10	antibiotic	vancomycin	no	therapeutic	all	adult,olderadult	phase4	1
https://pubmed.ncbi.nlm.nih.gov/24277020	2014	acute	n/a	goldensyrian	m	58	111	hamster		clindamycin+challenge	cumulativemortality	t	t	87	vpi10463	100000	cfu	spores	3	15	3	mg/kg	qd	5	vancomycin	1	sustained							control	vancomycin	no	therapeutic	all	adult,olderadult	phase3	0.740741
https://pubmed.ncbi.nlm.nih.gov/24277020	2014	acute	n/a	goldensyrian	m	58	111	hamster		clindamycin+challenge	cumulativemortality	t	t	87	vpi10463	100000	cfu	spores	3	15	3	mg/kg	qd	5	vancomycin	1	sustained							antibiotic	vancomycin	no	therapeutic	all	adult,olderadult	phase3	0.721519
https://pubmed.ncbi.nlm.nih.gov/24277020	2014	acute	n/a	goldensyrian	m	58	111	hamster		clindamycin+challenge	cumulativemortality	t	t	87	vpi10463	100000	cfu	spores	3	15	3	mg/kg	qd	5	vancomycin	1	sustained							antibiotic	vancomycin	no	therapeutic	all	adult,olderadult	phase2	0.263158
https://pubmed.ncbi.nlm.nih.gov/24277020	2014	acute	n/a	goldensyrian	m	58	111	hamster		clindamycin+challenge	cumulativemortality	t	t	87	vpi10463	100000	cfu	spores	3	15	3	mg/kg	qd	5	vancomycin	1	acute							antibiotic	vancomycin	no	therapeutic	all	adult,olderadult	phase2	0.306667
https://pubmed.ncbi.nlm.nih.gov/24277020	2014	acute	n/a	goldensyrian	m	58	111	hamster		clindamycin+challenge	cumulativemortality	t	t	87	vpi10463	100000	cfu	spores	3	15	3	mg/kg	qd	5	vancomycin	1	sustained							antibiotic	vancomycin	no	therapeutic	all	adult,olderadult	phase2	0.306667
https://pubmed.ncbi.nlm.nih.gov/24277020	2014	acute	n/a	goldensyrian	m	58	111	hamster		clindamycin+challenge	cumulativemortality	t	t	87	vpi10463	100000	cfu	spores	30	150	30	mg/kg	qd	5	vancomycin	1	acute	500	5000	125	mg	qid	10	antibiotic	vancomycin	yes	therapeutic	all	adult,olderadult	phase2	0.893939
https://pubmed.ncbi.nlm.nih.gov/24277020	2014	acute	n/a	goldensyrian	m	58	111	hamster		clindamycin+challenge	cumulativemortality	t	t	87	vpi10463	100000	cfu	spores	30	150	30	mg/kg	qd	5	vancomycin	1	sustained	500	5000	125	mg	qid	10	antibiotic	vancomycin	yes	therapeutic	all	adult,olderadult	phase2	0.644068
https://pubmed.ncbi.nlm.nih.gov/24277020	2014	acute	n/a	goldensyrian	m	58	111	hamster		clindamycin+challenge	cumulativemortality	t	t	87	vpi10463	100000	cfu	spores	30	150	30	mg/kg	qd	5	vancomycin	1	sustained	125		125	mg	qd		antibiotic	vancomycin	no	prophylactic	all	olderadult	phase4	1
https://pubmed.ncbi.nlm.nih.gov/24277020	2014	acute	n/a	goldensyrian	m	58	111	hamster		clindamycin+challenge	cumulativemortality	t	t	87	vpi10463	100000	cfu	spores	30	150	30	mg/kg	qd	5	vancomycin	1	acute	500	5000	125	mg	qid	10	antibiotic	vancomycin	no	therapeutic	all	adult,olderadult	phase3	0.853821
https://pubmed.ncbi.nlm.nih.gov/24277020	2014	acute	n/a	goldensyrian	m	58	111	hamster		clindamycin+challenge	cumulativemortality	t	t	87	vpi10463	100000	cfu	spores	30	150	30	mg/kg	qd	5	vancomycin	1	sustained	500	5000	125	mg	qid	10	antibiotic	vancomycin	no	therapeutic	all	adult,olderadult	phase3	0.61794
https://pubmed.ncbi.nlm.nih.gov/24277020	2014	acute	n/a	goldensyrian	m	58	111	hamster		clindamycin+challenge	cumulativemortality	t	t	87	vpi10463	100000	cfu	spores	30	150	30	mg/kg	qd	5	vancomycin	1	acute	500	5000	125	mg	qid	10	antibiotic	vancomycin	no	therapeutic	all	adult,olderadult	phase3	0.849057
https://pubmed.ncbi.nlm.nih.gov/24277020	2014	acute	n/a	goldensyrian	m	58	111	hamster		clindamycin+challenge	cumulativemortality	t	t	87	vpi10463	100000	cfu	spores	30	150	30	mg/kg	qd	5	vancomycin	1	sustained	500	5000	125	mg	qid	10	antibiotic	vancomycin	no	therapeutic	all	adult,olderadult	phase3	0.622642
https://pubmed.ncbi.nlm.nih.gov/24277020	2014	acute	n/a	goldensyrian	m	58	111	hamster		clindamycin+challenge	cumulativemortality	t	t	87	vpi10463	100000	cfu	spores	30	150	30	mg/kg	qd	5	vancomycin	1	acute	500	5000	125	mg	qid	10	antibiotic	vancomycin	no	therapeutic	all	adult,olderadult	phase4	0.821229
https://pubmed.ncbi.nlm.nih.gov/24277020	2014	acute	n/a	goldensyrian	m	58	111	hamster		clindamycin+challenge	cumulativemortality	t	t	87	vpi10463	100000	cfu	spores	30	150	30	mg/kg	qd	5	vancomycin	1	sustained	500	5000	125	mg	qid	10	antibiotic	vancomycin	no	therapeutic	all	adult,olderadult	phase4	0.592179
https://pubmed.ncbi.nlm.nih.gov/24277020	2014	acute	n/a	goldensyrian	m	58	111	hamster		clindamycin+challenge	cumulativemortality	t	t	87	vpi10463	100000	cfu	spores	30	150	30	mg/kg	qd	5	vancomycin	1	acute	500	5000	125	mg	qid	10	antibiotic	vancomycin	no	therapeutic	all	adult,olderadult	phase3	0.835714
https://pubmed.ncbi.nlm.nih.gov/24277020	2014	acute	n/a	goldensyrian	m	58	111	hamster		clindamycin+challenge	cumulativemortality	t	t	87	vpi10463	100000	cfu	spores	30	150	30	mg/kg	qd	5	vancomycin	1	sustained	500	5000	125	mg	qid	10	antibiotic	vancomycin	no	therapeutic	all	adult,olderadult	phase3	0.610714
https://pubmed.ncbi.nlm.nih.gov/24277020	2014	acute	n/a	goldensyrian	m	58	111	hamster		clindamycin+challenge	cumulativemortality	t	t	87	vpi10463	100000	cfu	spores	30	150	30	mg/kg	qd	5	vancomycin	1	acute	500	5000	125	mg	qid	10	antibiotic	vancomycin	no	therapeutic	all	adult,olderadult	phase3	0.818493
https://pubmed.ncbi.nlm.nih.gov/24277020	2014	acute	n/a	goldensyrian	m	58	111	hamster		clindamycin+challenge	cumulativemortality	t	t	87	vpi10463	100000	cfu	spores	30	150	30	mg/kg	qd	5	vancomycin	1	sustained	500	5000	125	mg	qid	10	antibiotic	vancomycin	no	therapeutic	all	adult,olderadult	phase3	0.589041
https://pubmed.ncbi.nlm.nih.gov/24277020	2014	acute	n/a	goldensyrian	m	58	111	hamster		clindamycin+challenge	cumulativemortality	t	t	87	vpi10463	100000	cfu	spores	30	150	30	mg/kg	qd	5	vancomycin	1	acute	500	5000	125	mg	qid	10	antibiotic	vancomycin	no	therapeutic	all	adult,olderadult	phase3	0.87963
https://pubmed.ncbi.nlm.nih.gov/24277020	2014	acute	n/a	goldensyrian	m	58	111	hamster		clindamycin+challenge	cumulativemortality	t	t	87	vpi10463	100000	cfu	spores	30	150	30	mg/kg	qd	5	vancomycin	1	sustained	500	5000	125	mg	qid	10	antibiotic	vancomycin	no	therapeutic	all	adult,olderadult	phase3	0.657407
https://pubmed.ncbi.nlm.nih.gov/24277020	2014	acute	n/a	goldensyrian	m	58	111	hamster		clindamycin+challenge	cumulativemortality	t	t	87	vpi10463	100000	cfu	spores	30	150	30	mg/kg	qd	5	vancomycin	1	acute	500	5000	125	mg	qid	10	antibiotic	vancomycin	no	therapeutic	all	adult,olderadult	phase3	0.1875
https://pubmed.ncbi.nlm.nih.gov/24277020	2014	acute	n/a	goldensyrian	m	58	111	hamster		clindamycin+challenge	cumulativemortality	t	t	87	vpi10463	100000	cfu	spores	30	150	30	mg/kg	qd	5	vancomycin	1	sustained	500	5000	125	mg	qid	10	antibiotic	vancomycin	no	therapeutic	all	adult,olderadult	phase3	0.3125
https://pubmed.ncbi.nlm.nih.gov/24277020	2014	acute	n/a	goldensyrian	m	58	111	hamster		clindamycin+challenge	cumulativemortality	t	t	87	vpi10463	100000	cfu	spores	30	150	30	mg/kg	qd	5	vancomycin	1	acute	500	5000	125	mg	qid	10	antibiotic	vancomycin	yes	therapeutic	all	adult,olderadult	phase2	0.863636
https://pubmed.ncbi.nlm.nih.gov/24277020	2014	acute	n/a	goldensyrian	m	58	111	hamster		clindamycin+challenge	cumulativemortality	t	t	87	vpi10463	100000	cfu	spores	30	150	30	mg/kg	qd	5	vancomycin	1	sustained	500	5000	125	mg	qid	10	antibiotic	vancomycin	yes	therapeutic	all	adult,olderadult	phase2	0.545455
https://pubmed.ncbi.nlm.nih.gov/24277020	2014	acute	n/a	goldensyrian	m	58	111	hamster		clindamycin+challenge	cumulativemortality	t	t	87	vpi10463	100000	cfu	spores	30	150	30	mg/kg	qd	5	vancomycin	1	acute	500	5000	125	mg	qid	10	antibiotic	vancomycin	no	therapeutic	all	child	phase3	0.704545
https://pubmed.ncbi.nlm.nih.gov/24277020	2014	acute	n/a	goldensyrian	m	58	111	hamster		clindamycin+challenge	cumulativemortality	t	t	87	vpi10463	100000	cfu	spores	30	150	30	mg/kg	qd	5	vancomycin	1	sustained	500	5000	125	mg	qid	10	antibiotic	vancomycin	no	therapeutic	all	child	phase3	0.741935
https://pubmed.ncbi.nlm.nih.gov/24277020	2014	acute	n/a	goldensyrian	m	58	111	hamster		clindamycin+challenge	cumulativemortality	t	t	87	vpi10463	100000	cfu	spores	30	150	30	mg/kg	qd	5	vancomycin	1	acute	500	5000	125	mg	qid	10	antibiotic	vancomycin	no	therapeutic	all	child,adult,olderadult	phase3	0.863281
https://pubmed.ncbi.nlm.nih.gov/24277020	2014	acute	n/a	goldensyrian	m	58	111	hamster		clindamycin+challenge	cumulativemortality	t	t	87	vpi10463	100000	cfu	spores	30	150	30	mg/kg	qd	5	vancomycin	1	sustained	500	5000	125	mg	qid	10	antibiotic	vancomycin	no	therapeutic	all	child,adult,olderadult	phase3	0.779279
https://pubmed.ncbi.nlm.nih.gov/24277020	2014	acute	n/a	goldensyrian	m	58	111	hamster		clindamycin+challenge	cumulativemortality	t	t	87	vpi10463	100000	cfu	spores	30	150	30	mg/kg	qd	5	vancomycin	1	acute	500	5000	125	mg	qid	10	antibiotic	vancomycin	no	therapeutic	all	child,adult,olderadult	phase3	0.856678
https://pubmed.ncbi.nlm.nih.gov/24277020	2014	acute	n/a	goldensyrian	m	58	111	hamster		clindamycin+challenge	cumulativemortality	t	t	87	vpi10463	100000	cfu	spores	30	150	30	mg/kg	qd	5	vancomycin	1	sustained	500	5000	125	mg	qid	10	antibiotic	vancomycin	no	therapeutic	all	child,adult,olderadult	phase3	0.745247
https://pubmed.ncbi.nlm.nih.gov/24277020	2014	acute	n/a	goldensyrian	m	58	111	hamster		clindamycin+challenge	cumulativemortality	t	t	87	vpi10463	100000	cfu	spores	30	150	30	mg/kg	qd	5	vancomycin	1	acute	500	5000	125	mg	qid	10	antibiotic	vancomycin	no	therapeutic	all	adult,olderadult	phase3	0.634783
https://pubmed.ncbi.nlm.nih.gov/24277020	2014	acute	n/a	goldensyrian	m	58	111	hamster		clindamycin+challenge	cumulativemortality	t	t	87	vpi10463	100000	cfu	spores	30	150	30	mg/kg	qd	5	vancomycin	1	sustained	500	5000	125	mg	qid	10	antibiotic	vancomycin	no	therapeutic	all	adult,olderadult	phase3	0.863014
https://pubmed.ncbi.nlm.nih.gov/24277020	2014	acute	n/a	goldensyrian	m	58	111	hamster		clindamycin+challenge	cumulativemortality	t	t	87	vpi10463	100000	cfu	spores	30	150	30	mg/kg	qd	5	vancomycin	1	acute	500	5000	125	mg	qid	10	antibiotic	vancomycin	no	therapeutic	all	adult,olderadult	phase3	0.808
https://pubmed.ncbi.nlm.nih.gov/24277020	2014	acute	n/a	goldensyrian	m	58	111	hamster		clindamycin+challenge	cumulativemortality	t	t	87	vpi10463	100000	cfu	spores	30	150	30	mg/kg	qd	5	vancomycin	1	sustained	500	5000	125	mg	qid	10	antibiotic	vancomycin	no	therapeutic	all	adult,olderadult	phase3	0.823529
https://pubmed.ncbi.nlm.nih.gov/24277020	2014	acute	n/a	goldensyrian	m	58	111	hamster		clindamycin+challenge	cumulativemortality	t	t	87	vpi10463	100000	cfu	spores	30	150	30	mg/kg	qd	5	vancomycin	1	acute	500	5000	125	mg	qid	10	antibiotic	vancomycin	no	therapeutic	all	adult,olderadult	phase3	0.80597
https://pubmed.ncbi.nlm.nih.gov/24277020	2014	acute	n/a	goldensyrian	m	58	111	hamster		clindamycin+challenge	cumulativemortality	t	t	87	vpi10463	100000	cfu	spores	30	150	30	mg/kg	qd	5	vancomycin	1	sustained	500	5000	125	mg	qid	10	antibiotic	vancomycin	no	therapeutic	all	adult,olderadult	phase3	0.757009
https://pubmed.ncbi.nlm.nih.gov/24277020	2014	acute	n/a	goldensyrian	m	58	111	hamster		clindamycin+challenge	cumulativemortality	t	t	87	vpi10463	100000	cfu	spores	30	150	30	mg/kg	qd	5	vancomycin	1	acute	500	5000	125	mg	qid	10	antibiotic	vancomycin	no	therapeutic	all	adult,olderadult	phase2	0.69697
https://pubmed.ncbi.nlm.nih.gov/24277020	2014	acute	n/a	goldensyrian	m	58	111	hamster		clindamycin+challenge	cumulativemortality	t	t	87	vpi10463	100000	cfu	spores	30	150	30	mg/kg	qd	5	vancomycin	1	sustained	500	5000	125	mg	qid	10	antibiotic	vancomycin	no	therapeutic	all	adult,olderadult	phase2	0.608696
https://pubmed.ncbi.nlm.nih.gov/24277020	2014	acute	n/a	goldensyrian	m	58	111	hamster		clindamycin+challenge	cumulativemortality	t	t	87	vpi10463	100000	cfu	spores	30	150	30	mg/kg	qd	5	vancomycin	1	acute	500	5000	125	mg	qid	10	antibiotic	vancomycin	no	therapeutic	all	adult,olderadult	phase4	0.666667
https://pubmed.ncbi.nlm.nih.gov/24277020	2014	acute	n/a	goldensyrian	m	58	111	hamster		clindamycin+challenge	cumulativemortality	t	t	87	vpi10463	100000	cfu	spores	30	150	30	mg/kg	qd	5	vancomycin	1	acute	500	5000	125	mg	qid	10	antibiotic	vancomycin	no	therapeutic	all	adult,olderadult	phase4	1
https://pubmed.ncbi.nlm.nih.gov/24277020	2014	acute	n/a	goldensyrian	m	58	111	hamster		clindamycin+challenge	cumulativemortality	t	t	87	vpi10463	100000	cfu	spores	30	150	30	mg/kg	qd	5	vancomycin	1	sustained							control	vancomycin	no	therapeutic	all	adult,olderadult	phase3	0.740741
https://pubmed.ncbi.nlm.nih.gov/24277020	2014	acute	n/a	goldensyrian	m	58	111	hamster		clindamycin+challenge	cumulativemortality	t	t	87	vpi10463	100000	cfu	spores	30	150	30	mg/kg	qd	5	vancomycin	1	sustained							antibiotic	vancomycin	no	therapeutic	all	adult,olderadult	phase3	0.721519
https://pubmed.ncbi.nlm.nih.gov/24277020	2014	acute	n/a	goldensyrian	m	58	111	hamster		clindamycin+challenge	cumulativemortality	t	t	87	vpi10463	100000	cfu	spores	30	150	30	mg/kg	qd	5	vancomycin	1	sustained							antibiotic	vancomycin	no	therapeutic	all	adult,olderadult	phase2	0.263158
https://pubmed.ncbi.nlm.nih.gov/24277020	2014	acute	n/a	goldensyrian	m	58	111	hamster		clindamycin+challenge	cumulativemortality	t	t	87	vpi10463	100000	cfu	spores	30	150	30	mg/kg	qd	5	vancomycin	1	acute							antibiotic	vancomycin	no	therapeutic	all	adult,olderadult	phase2	0.306667
https://pubmed.ncbi.nlm.nih.gov/24277020	2014	acute	n/a	goldensyrian	m	58	111	hamster		clindamycin+challenge	cumulativemortality	t	t	87	vpi10463	100000	cfu	spores	30	150	30	mg/kg	qd	5	vancomycin	1	sustained							antibiotic	vancomycin	no	therapeutic	all	adult,olderadult	phase2	0.306667
https://pubmed.ncbi.nlm.nih.gov/24277020	2014	acute	n/a	goldensyrian	m	58	111	hamster		clindamycin+challenge	cumulativemortality	t	t	87	vpi10463	100000	cfu	spores	300	1500	300	mg/kg	qd	5	vancomycin	1	acute	500	5000	125	mg	qid	10	antibiotic	vancomycin	yes	therapeutic	all	adult,olderadult	phase2	0.893939
https://pubmed.ncbi.nlm.nih.gov/24277020	2014	acute	n/a	goldensyrian	m	58	111	hamster		clindamycin+challenge	cumulativemortality	t	t	87	vpi10463	100000	cfu	spores	300	1500	300	mg/kg	qd	5	vancomycin	1	sustained	500	5000	125	mg	qid	10	antibiotic	vancomycin	yes	therapeutic	all	adult,olderadult	phase2	0.644068
https://pubmed.ncbi.nlm.nih.gov/24277020	2014	acute	n/a	goldensyrian	m	58	111	hamster		clindamycin+challenge	cumulativemortality	t	t	87	vpi10463	100000	cfu	spores	300	1500	300	mg/kg	qd	5	vancomycin	1	sustained	125		125	mg	qd		antibiotic	vancomycin	no	prophylactic	all	olderadult	phase4	1
https://pubmed.ncbi.nlm.nih.gov/24277020	2014	acute	n/a	goldensyrian	m	58	111	hamster		clindamycin+challenge	cumulativemortality	t	t	87	vpi10463	100000	cfu	spores	300	1500	300	mg/kg	qd	5	vancomycin	1	acute	500	5000	125	mg	qid	10	antibiotic	vancomycin	no	therapeutic	all	adult,olderadult	phase3	0.853821
https://pubmed.ncbi.nlm.nih.gov/24277020	2014	acute	n/a	goldensyrian	m	58	111	hamster		clindamycin+challenge	cumulativemortality	t	t	87	vpi10463	100000	cfu	spores	300	1500	300	mg/kg	qd	5	vancomycin	1	sustained	500	5000	125	mg	qid	10	antibiotic	vancomycin	no	therapeutic	all	adult,olderadult	phase3	0.61794
https://pubmed.ncbi.nlm.nih.gov/24277020	2014	acute	n/a	goldensyrian	m	58	111	hamster		clindamycin+challenge	cumulativemortality	t	t	87	vpi10463	100000	cfu	spores	300	1500	300	mg/kg	qd	5	vancomycin	1	acute	500	5000	125	mg	qid	10	antibiotic	vancomycin	no	therapeutic	all	adult,olderadult	phase3	0.849057
https://pubmed.ncbi.nlm.nih.gov/24277020	2014	acute	n/a	goldensyrian	m	58	111	hamster		clindamycin+challenge	cumulativemortality	t	t	87	vpi10463	100000	cfu	spores	300	1500	300	mg/kg	qd	5	vancomycin	1	sustained	500	5000	125	mg	qid	10	antibiotic	vancomycin	no	therapeutic	all	adult,olderadult	phase3	0.622642
https://pubmed.ncbi.nlm.nih.gov/24277020	2014	acute	n/a	goldensyrian	m	58	111	hamster		clindamycin+challenge	cumulativemortality	t	t	87	vpi10463	100000	cfu	spores	300	1500	300	mg/kg	qd	5	vancomycin	1	acute	500	5000	125	mg	qid	10	antibiotic	vancomycin	no	therapeutic	all	adult,olderadult	phase4	0.821229
https://pubmed.ncbi.nlm.nih.gov/24277020	2014	acute	n/a	goldensyrian	m	58	111	hamster		clindamycin+challenge	cumulativemortality	t	t	87	vpi10463	100000	cfu	spores	300	1500	300	mg/kg	qd	5	vancomycin	1	sustained	500	5000	125	mg	qid	10	antibiotic	vancomycin	no	therapeutic	all	adult,olderadult	phase4	0.592179
https://pubmed.ncbi.nlm.nih.gov/24277020	2014	acute	n/a	goldensyrian	m	58	111	hamster		clindamycin+challenge	cumulativemortality	t	t	87	vpi10463	100000	cfu	spores	300	1500	300	mg/kg	qd	5	vancomycin	1	acute	500	5000	125	mg	qid	10	antibiotic	vancomycin	no	therapeutic	all	adult,olderadult	phase3	0.835714
https://pubmed.ncbi.nlm.nih.gov/24277020	2014	acute	n/a	goldensyrian	m	58	111	hamster		clindamycin+challenge	cumulativemortality	t	t	87	vpi10463	100000	cfu	spores	300	1500	300	mg/kg	qd	5	vancomycin	1	sustained	500	5000	125	mg	qid	10	antibiotic	vancomycin	no	therapeutic	all	adult,olderadult	phase3	0.610714
https://pubmed.ncbi.nlm.nih.gov/24277020	2014	acute	n/a	goldensyrian	m	58	111	hamster		clindamycin+challenge	cumulativemortality	t	t	87	vpi10463	100000	cfu	spores	300	1500	300	mg/kg	qd	5	vancomycin	1	acute	500	5000	125	mg	qid	10	antibiotic	vancomycin	no	therapeutic	all	adult,olderadult	phase3	0.818493
https://pubmed.ncbi.nlm.nih.gov/24277020	2014	acute	n/a	goldensyrian	m	58	111	hamster		clindamycin+challenge	cumulativemortality	t	t	87	vpi10463	100000	cfu	spores	300	1500	300	mg/kg	qd	5	vancomycin	1	sustained	500	5000	125	mg	qid	10	antibiotic	vancomycin	no	therapeutic	all	adult,olderadult	phase3	0.589041
https://pubmed.ncbi.nlm.nih.gov/24277020	2014	acute	n/a	goldensyrian	m	58	111	hamster		clindamycin+challenge	cumulativemortality	t	t	87	vpi10463	100000	cfu	spores	300	1500	300	mg/kg	qd	5	vancomycin	1	acute	500	5000	125	mg	qid	10	antibiotic	vancomycin	no	therapeutic	all	adult,olderadult	phase3	0.87963
https://pubmed.ncbi.nlm.nih.gov/24277020	2014	acute	n/a	goldensyrian	m	58	111	hamster		clindamycin+challenge	cumulativemortality	t	t	87	vpi10463	100000	cfu	spores	300	1500	300	mg/kg	qd	5	vancomycin	1	sustained	500	5000	125	mg	qid	10	antibiotic	vancomycin	no	therapeutic	all	adult,olderadult	phase3	0.657407
https://pubmed.ncbi.nlm.nih.gov/24277020	2014	acute	n/a	goldensyrian	m	58	111	hamster		clindamycin+challenge	cumulativemortality	t	t	87	vpi10463	100000	cfu	spores	300	1500	300	mg/kg	qd	5	vancomycin	1	acute	500	5000	125	mg	qid	10	antibiotic	vancomycin	no	therapeutic	all	adult,olderadult	phase3	0.1875
https://pubmed.ncbi.nlm.nih.gov/24277020	2014	acute	n/a	goldensyrian	m	58	111	hamster		clindamycin+challenge	cumulativemortality	t	t	87	vpi10463	100000	cfu	spores	300	1500	300	mg/kg	qd	5	vancomycin	1	sustained	500	5000	125	mg	qid	10	antibiotic	vancomycin	no	therapeutic	all	adult,olderadult	phase3	0.3125
https://pubmed.ncbi.nlm.nih.gov/24277020	2014	acute	n/a	goldensyrian	m	58	111	hamster		clindamycin+challenge	cumulativemortality	t	t	87	vpi10463	100000	cfu	spores	300	1500	300	mg/kg	qd	5	vancomycin	1	acute	500	5000	125	mg	qid	10	antibiotic	vancomycin	yes	therapeutic	all	adult,olderadult	phase2	0.863636
https://pubmed.ncbi.nlm.nih.gov/24277020	2014	acute	n/a	goldensyrian	m	58	111	hamster		clindamycin+challenge	cumulativemortality	t	t	87	vpi10463	100000	cfu	spores	300	1500	300	mg/kg	qd	5	vancomycin	1	sustained	500	5000	125	mg	qid	10	antibiotic	vancomycin	yes	therapeutic	all	adult,olderadult	phase2	0.545455
https://pubmed.ncbi.nlm.nih.gov/24277020	2014	acute	n/a	goldensyrian	m	58	111	hamster		clindamycin+challenge	cumulativemortality	t	t	87	vpi10463	100000	cfu	spores	300	1500	300	mg/kg	qd	5	vancomycin	1	acute	500	5000	125	mg	qid	10	antibiotic	vancomycin	no	therapeutic	all	child	phase3	0.704545
https://pubmed.ncbi.nlm.nih.gov/24277020	2014	acute	n/a	goldensyrian	m	58	111	hamster		clindamycin+challenge	cumulativemortality	t	t	87	vpi10463	100000	cfu	spores	300	1500	300	mg/kg	qd	5	vancomycin	1	sustained	500	5000	125	mg	qid	10	antibiotic	vancomycin	no	therapeutic	all	child	phase3	0.741935
https://pubmed.ncbi.nlm.nih.gov/24277020	2014	acute	n/a	goldensyrian	m	58	111	hamster		clindamycin+challenge	cumulativemortality	t	t	87	vpi10463	100000	cfu	spores	300	1500	300	mg/kg	qd	5	vancomycin	1	acute	500	5000	125	mg	qid	10	antibiotic	vancomycin	no	therapeutic	all	child,adult,olderadult	phase3	0.863281
https://pubmed.ncbi.nlm.nih.gov/24277020	2014	acute	n/a	goldensyrian	m	58	111	hamster		clindamycin+challenge	cumulativemortality	t	t	87	vpi10463	100000	cfu	spores	300	1500	300	mg/kg	qd	5	vancomycin	1	sustained	500	5000	125	mg	qid	10	antibiotic	vancomycin	no	therapeutic	all	child,adult,olderadult	phase3	0.779279
https://pubmed.ncbi.nlm.nih.gov/24277020	2014	acute	n/a	goldensyrian	m	58	111	hamster		clindamycin+challenge	cumulativemortality	t	t	87	vpi10463	100000	cfu	spores	300	1500	300	mg/kg	qd	5	vancomycin	1	acute	500	5000	125	mg	qid	10	antibiotic	vancomycin	no	therapeutic	all	child,adult,olderadult	phase3	0.856678
https://pubmed.ncbi.nlm.nih.gov/24277020	2014	acute	n/a	goldensyrian	m	58	111	hamster		clindamycin+challenge	cumulativemortality	t	t	87	vpi10463	100000	cfu	spores	300	1500	300	mg/kg	qd	5	vancomycin	1	sustained	500	5000	125	mg	qid	10	antibiotic	vancomycin	no	therapeutic	all	child,adult,olderadult	phase3	0.745247
https://pubmed.ncbi.nlm.nih.gov/24277020	2014	acute	n/a	goldensyrian	m	58	111	hamster		clindamycin+challenge	cumulativemortality	t	t	87	vpi10463	100000	cfu	spores	300	1500	300	mg/kg	qd	5	vancomycin	1	acute	500	5000	125	mg	qid	10	antibiotic	vancomycin	no	therapeutic	all	adult,olderadult	phase3	0.634783
https://pubmed.ncbi.nlm.nih.gov/24277020	2014	acute	n/a	goldensyrian	m	58	111	hamster		clindamycin+challenge	cumulativemortality	t	t	87	vpi10463	100000	cfu	spores	300	1500	300	mg/kg	qd	5	vancomycin	1	sustained	500	5000	125	mg	qid	10	antibiotic	vancomycin	no	therapeutic	all	adult,olderadult	phase3	0.863014
https://pubmed.ncbi.nlm.nih.gov/24277020	2014	acute	n/a	goldensyrian	m	58	111	hamster		clindamycin+challenge	cumulativemortality	t	t	87	vpi10463	100000	cfu	spores	300	1500	300	mg/kg	qd	5	vancomycin	1	acute	500	5000	125	mg	qid	10	antibiotic	vancomycin	no	therapeutic	all	adult,olderadult	phase3	0.808
https://pubmed.ncbi.nlm.nih.gov/24277020	2014	acute	n/a	goldensyrian	m	58	111	hamster		clindamycin+challenge	cumulativemortality	t	t	87	vpi10463	100000	cfu	spores	300	1500	300	mg/kg	qd	5	vancomycin	1	sustained	500	5000	125	mg	qid	10	antibiotic	vancomycin	no	therapeutic	all	adult,olderadult	phase3	0.823529
https://pubmed.ncbi.nlm.nih.gov/24277020	2014	acute	n/a	goldensyrian	m	58	111	hamster		clindamycin+challenge	cumulativemortality	t	t	87	vpi10463	100000	cfu	spores	300	1500	300	mg/kg	qd	5	vancomycin	1	acute	500	5000	125	mg	qid	10	antibiotic	vancomycin	no	therapeutic	all	adult,olderadult	phase3	0.80597
https://pubmed.ncbi.nlm.nih.gov/24277020	2014	acute	n/a	goldensyrian	m	58	111	hamster		clindamycin+challenge	cumulativemortality	t	t	87	vpi10463	100000	cfu	spores	300	1500	300	mg/kg	qd	5	vancomycin	1	sustained	500	5000	125	mg	qid	10	antibiotic	vancomycin	no	therapeutic	all	adult,olderadult	phase3	0.757009
https://pubmed.ncbi.nlm.nih.gov/24277020	2014	acute	n/a	goldensyrian	m	58	111	hamster		clindamycin+challenge	cumulativemortality	t	t	87	vpi10463	100000	cfu	spores	300	1500	300	mg/kg	qd	5	vancomycin	1	acute	500	5000	125	mg	qid	10	antibiotic	vancomycin	no	therapeutic	all	adult,olderadult	phase2	0.69697
https://pubmed.ncbi.nlm.nih.gov/24277020	2014	acute	n/a	goldensyrian	m	58	111	hamster		clindamycin+challenge	cumulativemortality	t	t	87	vpi10463	100000	cfu	spores	300	1500	300	mg/kg	qd	5	vancomycin	1	sustained	500	5000	125	mg	qid	10	antibiotic	vancomycin	no	therapeutic	all	adult,olderadult	phase2	0.608696
https://pubmed.ncbi.nlm.nih.gov/24277020	2014	acute	n/a	goldensyrian	m	58	111	hamster		clindamycin+challenge	cumulativemortality	t	t	87	vpi10463	100000	cfu	spores	300	1500	300	mg/kg	qd	5	vancomycin	1	acute	500	5000	125	mg	qid	10	antibiotic	vancomycin	no	therapeutic	all	adult,olderadult	phase4	0.666667
https://pubmed.ncbi.nlm.nih.gov/24277020	2014	acute	n/a	goldensyrian	m	58	111	hamster		clindamycin+challenge	cumulativemortality	t	t	87	vpi10463	100000	cfu	spores	300	1500	300	mg/kg	qd	5	vancomycin	1	acute	500	5000	125	mg	qid	10	antibiotic	vancomycin	no	therapeutic	all	adult,olderadult	phase4	1
https://pubmed.ncbi.nlm.nih.gov/24277020	2014	acute	n/a	goldensyrian	m	58	111	hamster		clindamycin+challenge	cumulativemortality	t	t	87	vpi10463	100000	cfu	spores	300	1500	300	mg/kg	qd	5	vancomycin	1	sustained							control	vancomycin	no	therapeutic	all	adult,olderadult	phase3	0.740741
https://pubmed.ncbi.nlm.nih.gov/24277020	2014	acute	n/a	goldensyrian	m	58	111	hamster		clindamycin+challenge	cumulativemortality	t	t	87	vpi10463	100000	cfu	spores	300	1500	300	mg/kg	qd	5	vancomycin	1	sustained							antibiotic	vancomycin	no	therapeutic	all	adult,olderadult	phase3	0.721519
https://pubmed.ncbi.nlm.nih.gov/24277020	2014	acute	n/a	goldensyrian	m	58	111	hamster		clindamycin+challenge	cumulativemortality	t	t	87	vpi10463	100000	cfu	spores	300	1500	300	mg/kg	qd	5	vancomycin	1	sustained							antibiotic	vancomycin	no	therapeutic	all	adult,olderadult	phase2	0.263158
https://pubmed.ncbi.nlm.nih.gov/24277020	2014	acute	n/a	goldensyrian	m	58	111	hamster		clindamycin+challenge	cumulativemortality	t	t	87	vpi10463	100000	cfu	spores	300	1500	300	mg/kg	qd	5	vancomycin	1	acute							antibiotic	vancomycin	no	therapeutic	all	adult,olderadult	phase2	0.306667
https://pubmed.ncbi.nlm.nih.gov/24277020	2014	acute	n/a	goldensyrian	m	58	111	hamster		clindamycin+challenge	cumulativemortality	t	t	87	vpi10463	100000	cfu	spores	300	1500	300	mg/kg	qd	5	vancomycin	1	sustained							antibiotic	vancomycin	no	therapeutic	all	adult,olderadult	phase2	0.306667
https://pubmed.ncbi.nlm.nih.gov/24277020	2014	acute	n/a	goldensyrian	m	58	111	hamster		clindamycin+challenge	cumulativemortality	t	t	87	vpi10463	100000	cfu	spores	50	250	50	mg/kg	qd	5	vancomycin	1	acute	500	5000	125	mg	qid	10	antibiotic	vancomycin	yes	therapeutic	all	adult,olderadult	phase2	0.893939
https://pubmed.ncbi.nlm.nih.gov/24277020	2014	acute	n/a	goldensyrian	m	58	111	hamster		clindamycin+challenge	cumulativemortality	t	t	87	vpi10463	100000	cfu	spores	50	250	50	mg/kg	qd	5	vancomycin	1	sustained	500	5000	125	mg	qid	10	antibiotic	vancomycin	yes	therapeutic	all	adult,olderadult	phase2	0.644068
https://pubmed.ncbi.nlm.nih.gov/24277020	2014	acute	n/a	goldensyrian	m	58	111	hamster		clindamycin+challenge	cumulativemortality	t	t	87	vpi10463	100000	cfu	spores	50	250	50	mg/kg	qd	5	vancomycin	1	sustained	125		125	mg	qd		antibiotic	vancomycin	no	prophylactic	all	olderadult	phase4	1
https://pubmed.ncbi.nlm.nih.gov/24277020	2014	acute	n/a	goldensyrian	m	58	111	hamster		clindamycin+challenge	cumulativemortality	t	t	87	vpi10463	100000	cfu	spores	50	250	50	mg/kg	qd	5	vancomycin	1	acute	500	5000	125	mg	qid	10	antibiotic	vancomycin	no	therapeutic	all	adult,olderadult	phase3	0.853821
https://pubmed.ncbi.nlm.nih.gov/24277020	2014	acute	n/a	goldensyrian	m	58	111	hamster		clindamycin+challenge	cumulativemortality	t	t	87	vpi10463	100000	cfu	spores	50	250	50	mg/kg	qd	5	vancomycin	1	sustained	500	5000	125	mg	qid	10	antibiotic	vancomycin	no	therapeutic	all	adult,olderadult	phase3	0.61794
https://pubmed.ncbi.nlm.nih.gov/24277020	2014	acute	n/a	goldensyrian	m	58	111	hamster		clindamycin+challenge	cumulativemortality	t	t	87	vpi10463	100000	cfu	spores	50	250	50	mg/kg	qd	5	vancomycin	1	acute	500	5000	125	mg	qid	10	antibiotic	vancomycin	no	therapeutic	all	adult,olderadult	phase3	0.849057
https://pubmed.ncbi.nlm.nih.gov/24277020	2014	acute	n/a	goldensyrian	m	58	111	hamster		clindamycin+challenge	cumulativemortality	t	t	87	vpi10463	100000	cfu	spores	50	250	50	mg/kg	qd	5	vancomycin	1	sustained	500	5000	125	mg	qid	10	antibiotic	vancomycin	no	therapeutic	all	adult,olderadult	phase3	0.622642
https://pubmed.ncbi.nlm.nih.gov/24277020	2014	acute	n/a	goldensyrian	m	58	111	hamster		clindamycin+challenge	cumulativemortality	t	t	87	vpi10463	100000	cfu	spores	50	250	50	mg/kg	qd	5	vancomycin	1	acute	500	5000	125	mg	qid	10	antibiotic	vancomycin	no	therapeutic	all	adult,olderadult	phase4	0.821229
https://pubmed.ncbi.nlm.nih.gov/24277020	2014	acute	n/a	goldensyrian	m	58	111	hamster		clindamycin+challenge	cumulativemortality	t	t	87	vpi10463	100000	cfu	spores	50	250	50	mg/kg	qd	5	vancomycin	1	sustained	500	5000	125	mg	qid	10	antibiotic	vancomycin	no	therapeutic	all	adult,olderadult	phase4	0.592179
https://pubmed.ncbi.nlm.nih.gov/24277020	2014	acute	n/a	goldensyrian	m	58	111	hamster		clindamycin+challenge	cumulativemortality	t	t	87	vpi10463	100000	cfu	spores	50	250	50	mg/kg	qd	5	vancomycin	1	acute	500	5000	125	mg	qid	10	antibiotic	vancomycin	no	therapeutic	all	adult,olderadult	phase3	0.835714
https://pubmed.ncbi.nlm.nih.gov/24277020	2014	acute	n/a	goldensyrian	m	58	111	hamster		clindamycin+challenge	cumulativemortality	t	t	87	vpi10463	100000	cfu	spores	50	250	50	mg/kg	qd	5	vancomycin	1	sustained	500	5000	125	mg	qid	10	antibiotic	vancomycin	no	therapeutic	all	adult,olderadult	phase3	0.610714
https://pubmed.ncbi.nlm.nih.gov/24277020	2014	acute	n/a	goldensyrian	m	58	111	hamster		clindamycin+challenge	cumulativemortality	t	t	87	vpi10463	100000	cfu	spores	50	250	50	mg/kg	qd	5	vancomycin	1	acute	500	5000	125	mg	qid	10	antibiotic	vancomycin	no	therapeutic	all	adult,olderadult	phase3	0.818493
https://pubmed.ncbi.nlm.nih.gov/24277020	2014	acute	n/a	goldensyrian	m	58	111	hamster		clindamycin+challenge	cumulativemortality	t	t	87	vpi10463	100000	cfu	spores	50	250	50	mg/kg	qd	5	vancomycin	1	sustained	500	5000	125	mg	qid	10	antibiotic	vancomycin	no	therapeutic	all	adult,olderadult	phase3	0.589041
https://pubmed.ncbi.nlm.nih.gov/24277020	2014	acute	n/a	goldensyrian	m	58	111	hamster		clindamycin+challenge	cumulativemortality	t	t	87	vpi10463	100000	cfu	spores	50	250	50	mg/kg	qd	5	vancomycin	1	acute	500	5000	125	mg	qid	10	antibiotic	vancomycin	no	therapeutic	all	adult,olderadult	phase3	0.87963
https://pubmed.ncbi.nlm.nih.gov/24277020	2014	acute	n/a	goldensyrian	m	58	111	hamster		clindamycin+challenge	cumulativemortality	t	t	87	vpi10463	100000	cfu	spores	50	250	50	mg/kg	qd	5	vancomycin	1	sustained	500	5000	125	mg	qid	10	antibiotic	vancomycin	no	therapeutic	all	adult,olderadult	phase3	0.657407
https://pubmed.ncbi.nlm.nih.gov/24277020	2014	acute	n/a	goldensyrian	m	58	111	hamster		clindamycin+challenge	cumulativemortality	t	t	87	vpi10463	100000	cfu	spores	50	250	50	mg/kg	qd	5	vancomycin	1	acute	500	5000	125	mg	qid	10	antibiotic	vancomycin	no	therapeutic	all	adult,olderadult	phase3	0.1875
https://pubmed.ncbi.nlm.nih.gov/24277020	2014	acute	n/a	goldensyrian	m	58	111	hamster		clindamycin+challenge	cumulativemortality	t	t	87	vpi10463	100000	cfu	spores	50	250	50	mg/kg	qd	5	vancomycin	1	sustained	500	5000	125	mg	qid	10	antibiotic	vancomycin	no	therapeutic	all	adult,olderadult	phase3	0.3125
https://pubmed.ncbi.nlm.nih.gov/24277020	2014	acute	n/a	goldensyrian	m	58	111	hamster		clindamycin+challenge	cumulativemortality	t	t	87	vpi10463	100000	cfu	spores	50	250	50	mg/kg	qd	5	vancomycin	1	acute	500	5000	125	mg	qid	10	antibiotic	vancomycin	yes	therapeutic	all	adult,olderadult	phase2	0.863636
https://pubmed.ncbi.nlm.nih.gov/24277020	2014	acute	n/a	goldensyrian	m	58	111	hamster		clindamycin+challenge	cumulativemortality	t	t	87	vpi10463	100000	cfu	spores	50	250	50	mg/kg	qd	5	vancomycin	1	sustained	500	5000	125	mg	qid	10	antibiotic	vancomycin	yes	therapeutic	all	adult,olderadult	phase2	0.545455
https://pubmed.ncbi.nlm.nih.gov/24277020	2014	acute	n/a	goldensyrian	m	58	111	hamster		clindamycin+challenge	cumulativemortality	t	t	87	vpi10463	100000	cfu	spores	50	250	50	mg/kg	qd	5	vancomycin	1	acute	500	5000	125	mg	qid	10	antibiotic	vancomycin	no	therapeutic	all	child	phase3	0.704545
https://pubmed.ncbi.nlm.nih.gov/24277020	2014	acute	n/a	goldensyrian	m	58	111	hamster		clindamycin+challenge	cumulativemortality	t	t	87	vpi10463	100000	cfu	spores	50	250	50	mg/kg	qd	5	vancomycin	1	sustained	500	5000	125	mg	qid	10	antibiotic	vancomycin	no	therapeutic	all	child	phase3	0.741935
https://pubmed.ncbi.nlm.nih.gov/24277020	2014	acute	n/a	goldensyrian	m	58	111	hamster		clindamycin+challenge	cumulativemortality	t	t	87	vpi10463	100000	cfu	spores	50	250	50	mg/kg	qd	5	vancomycin	1	acute	500	5000	125	mg	qid	10	antibiotic	vancomycin	no	therapeutic	all	child,adult,olderadult	phase3	0.863281
https://pubmed.ncbi.nlm.nih.gov/24277020	2014	acute	n/a	goldensyrian	m	58	111	hamster		clindamycin+challenge	cumulativemortality	t	t	87	vpi10463	100000	cfu	spores	50	250	50	mg/kg	qd	5	vancomycin	1	sustained	500	5000	125	mg	qid	10	antibiotic	vancomycin	no	therapeutic	all	child,adult,olderadult	phase3	0.779279
https://pubmed.ncbi.nlm.nih.gov/24277020	2014	acute	n/a	goldensyrian	m	58	111	hamster		clindamycin+challenge	cumulativemortality	t	t	87	vpi10463	100000	cfu	spores	50	250	50	mg/kg	qd	5	vancomycin	1	acute	500	5000	125	mg	qid	10	antibiotic	vancomycin	no	therapeutic	all	child,adult,olderadult	phase3	0.856678
https://pubmed.ncbi.nlm.nih.gov/24277020	2014	acute	n/a	goldensyrian	m	58	111	hamster		clindamycin+challenge	cumulativemortality	t	t	87	vpi10463	100000	cfu	spores	50	250	50	mg/kg	qd	5	vancomycin	1	sustained	500	5000	125	mg	qid	10	antibiotic	vancomycin	no	therapeutic	all	child,adult,olderadult	phase3	0.745247
https://pubmed.ncbi.nlm.nih.gov/24277020	2014	acute	n/a	goldensyrian	m	58	111	hamster		clindamycin+challenge	cumulativemortality	t	t	87	vpi10463	100000	cfu	spores	50	250	50	mg/kg	qd	5	vancomycin	1	acute	500	5000	125	mg	qid	10	antibiotic	vancomycin	no	therapeutic	all	adult,olderadult	phase3	0.634783
https://pubmed.ncbi.nlm.nih.gov/24277020	2014	acute	n/a	goldensyrian	m	58	111	hamster		clindamycin+challenge	cumulativemortality	t	t	87	vpi10463	100000	cfu	spores	50	250	50	mg/kg	qd	5	vancomycin	1	sustained	500	5000	125	mg	qid	10	antibiotic	vancomycin	no	therapeutic	all	adult,olderadult	phase3	0.863014
https://pubmed.ncbi.nlm.nih.gov/24277020	2014	acute	n/a	goldensyrian	m	58	111	hamster		clindamycin+challenge	cumulativemortality	t	t	87	vpi10463	100000	cfu	spores	50	250	50	mg/kg	qd	5	vancomycin	1	acute	500	5000	125	mg	qid	10	antibiotic	vancomycin	no	therapeutic	all	adult,olderadult	phase3	0.808
https://pubmed.ncbi.nlm.nih.gov/24277020	2014	acute	n/a	goldensyrian	m	58	111	hamster		clindamycin+challenge	cumulativemortality	t	t	87	vpi10463	100000	cfu	spores	50	250	50	mg/kg	qd	5	vancomycin	1	sustained	500	5000	125	mg	qid	10	antibiotic	vancomycin	no	therapeutic	all	adult,olderadult	phase3	0.823529
https://pubmed.ncbi.nlm.nih.gov/24277020	2014	acute	n/a	goldensyrian	m	58	111	hamster		clindamycin+challenge	cumulativemortality	t	t	87	vpi10463	100000	cfu	spores	50	250	50	mg/kg	qd	5	vancomycin	1	acute	500	5000	125	mg	qid	10	antibiotic	vancomycin	no	therapeutic	all	adult,olderadult	phase3	0.80597
https://pubmed.ncbi.nlm.nih.gov/24277020	2014	acute	n/a	goldensyrian	m	58	111	hamster		clindamycin+challenge	cumulativemortality	t	t	87	vpi10463	100000	cfu	spores	50	250	50	mg/kg	qd	5	vancomycin	1	sustained	500	5000	125	mg	qid	10	antibiotic	vancomycin	no	therapeutic	all	adult,olderadult	phase3	0.757009
https://pubmed.ncbi.nlm.nih.gov/24277020	2014	acute	n/a	goldensyrian	m	58	111	hamster		clindamycin+challenge	cumulativemortality	t	t	87	vpi10463	100000	cfu	spores	50	250	50	mg/kg	qd	5	vancomycin	1	acute	500	5000	125	mg	qid	10	antibiotic	vancomycin	no	therapeutic	all	adult,olderadult	phase2	0.69697
https://pubmed.ncbi.nlm.nih.gov/24277020	2014	acute	n/a	goldensyrian	m	58	111	hamster		clindamycin+challenge	cumulativemortality	t	t	87	vpi10463	100000	cfu	spores	50	250	50	mg/kg	qd	5	vancomycin	1	sustained	500	5000	125	mg	qid	10	antibiotic	vancomycin	no	therapeutic	all	adult,olderadult	phase2	0.608696
https://pubmed.ncbi.nlm.nih.gov/24277020	2014	acute	n/a	goldensyrian	m	58	111	hamster		clindamycin+challenge	cumulativemortality	t	t	87	vpi10463	100000	cfu	spores	50	250	50	mg/kg	qd	5	vancomycin	1	acute	500	5000	125	mg	qid	10	antibiotic	vancomycin	no	therapeutic	all	adult,olderadult	phase4	0.666667
https://pubmed.ncbi.nlm.nih.gov/24277020	2014	acute	n/a	goldensyrian	m	58	111	hamster		clindamycin+challenge	cumulativemortality	t	t	87	vpi10463	100000	cfu	spores	50	250	50	mg/kg	qd	5	vancomycin	1	acute	500	5000	125	mg	qid	10	antibiotic	vancomycin	no	therapeutic	all	adult,olderadult	phase4	1
https://pubmed.ncbi.nlm.nih.gov/24277020	2014	acute	n/a	goldensyrian	m	58	111	hamster		clindamycin+challenge	cumulativemortality	t	t	87	vpi10463	100000	cfu	spores	50	250	50	mg/kg	qd	5	vancomycin	1	sustained							control	vancomycin	no	therapeutic	all	adult,olderadult	phase3	0.740741
https://pubmed.ncbi.nlm.nih.gov/24277020	2014	acute	n/a	goldensyrian	m	58	111	hamster		clindamycin+challenge	cumulativemortality	t	t	87	vpi10463	100000	cfu	spores	50	250	50	mg/kg	qd	5	vancomycin	1	sustained							antibiotic	vancomycin	no	therapeutic	all	adult,olderadult	phase3	0.721519
https://pubmed.ncbi.nlm.nih.gov/24277020	2014	acute	n/a	goldensyrian	m	58	111	hamster		clindamycin+challenge	cumulativemortality	t	t	87	vpi10463	100000	cfu	spores	50	250	50	mg/kg	qd	5	vancomycin	1	sustained							antibiotic	vancomycin	no	therapeutic	all	adult,olderadult	phase2	0.263158
https://pubmed.ncbi.nlm.nih.gov/24277020	2014	acute	n/a	goldensyrian	m	58	111	hamster		clindamycin+challenge	cumulativemortality	t	t	87	vpi10463	100000	cfu	spores	50	250	50	mg/kg	qd	5	vancomycin	1	acute							antibiotic	vancomycin	no	therapeutic	all	adult,olderadult	phase2	0.306667
https://pubmed.ncbi.nlm.nih.gov/24277020	2014	acute	n/a	goldensyrian	m	58	111	hamster		clindamycin+challenge	cumulativemortality	t	t	87	vpi10463	100000	cfu	spores	50	250	50	mg/kg	qd	5	vancomycin	1	sustained							antibiotic	vancomycin	no	therapeutic	all	adult,olderadult	phase2	0.306667
https://pubmed.ncbi.nlm.nih.gov/24277020	2014	sustained	n/a	goldensyrian	m	58	111	hamster		clindamycin+challenge	cumulativemortality	t	t	87	vpi10463	100000	cfu	spores	0.3	1.5	0.3	mg/kg	qd	5	vancomycin	0	acute	500	5000	125	mg	qid	10	antibiotic	vancomycin	yes	therapeutic	all	adult,olderadult	phase2	0.893939
https://pubmed.ncbi.nlm.nih.gov/24277020	2014	sustained	n/a	goldensyrian	m	58	111	hamster		clindamycin+challenge	cumulativemortality	t	t	87	vpi10463	100000	cfu	spores	0.3	1.5	0.3	mg/kg	qd	5	vancomycin	0	sustained	500	5000	125	mg	qid	10	antibiotic	vancomycin	yes	therapeutic	all	adult,olderadult	phase2	0.644068
https://pubmed.ncbi.nlm.nih.gov/24277020	2014	sustained	n/a	goldensyrian	m	58	111	hamster		clindamycin+challenge	cumulativemortality	t	t	87	vpi10463	100000	cfu	spores	0.3	1.5	0.3	mg/kg	qd	5	vancomycin	0	sustained	125		125	mg	qd		antibiotic	vancomycin	no	prophylactic	all	olderadult	phase4	1
https://pubmed.ncbi.nlm.nih.gov/24277020	2014	sustained	n/a	goldensyrian	m	58	111	hamster		clindamycin+challenge	cumulativemortality	t	t	87	vpi10463	100000	cfu	spores	0.3	1.5	0.3	mg/kg	qd	5	vancomycin	0	acute	500	5000	125	mg	qid	10	antibiotic	vancomycin	no	therapeutic	all	adult,olderadult	phase3	0.853821
https://pubmed.ncbi.nlm.nih.gov/24277020	2014	sustained	n/a	goldensyrian	m	58	111	hamster		clindamycin+challenge	cumulativemortality	t	t	87	vpi10463	100000	cfu	spores	0.3	1.5	0.3	mg/kg	qd	5	vancomycin	0	sustained	500	5000	125	mg	qid	10	antibiotic	vancomycin	no	therapeutic	all	adult,olderadult	phase3	0.61794
https://pubmed.ncbi.nlm.nih.gov/24277020	2014	sustained	n/a	goldensyrian	m	58	111	hamster		clindamycin+challenge	cumulativemortality	t	t	87	vpi10463	100000	cfu	spores	0.3	1.5	0.3	mg/kg	qd	5	vancomycin	0	acute	500	5000	125	mg	qid	10	antibiotic	vancomycin	no	therapeutic	all	adult,olderadult	phase3	0.849057
https://pubmed.ncbi.nlm.nih.gov/24277020	2014	sustained	n/a	goldensyrian	m	58	111	hamster		clindamycin+challenge	cumulativemortality	t	t	87	vpi10463	100000	cfu	spores	0.3	1.5	0.3	mg/kg	qd	5	vancomycin	0	sustained	500	5000	125	mg	qid	10	antibiotic	vancomycin	no	therapeutic	all	adult,olderadult	phase3	0.622642
https://pubmed.ncbi.nlm.nih.gov/24277020	2014	sustained	n/a	goldensyrian	m	58	111	hamster		clindamycin+challenge	cumulativemortality	t	t	87	vpi10463	100000	cfu	spores	0.3	1.5	0.3	mg/kg	qd	5	vancomycin	0	acute	500	5000	125	mg	qid	10	antibiotic	vancomycin	no	therapeutic	all	adult,olderadult	phase4	0.821229
https://pubmed.ncbi.nlm.nih.gov/24277020	2014	sustained	n/a	goldensyrian	m	58	111	hamster		clindamycin+challenge	cumulativemortality	t	t	87	vpi10463	100000	cfu	spores	0.3	1.5	0.3	mg/kg	qd	5	vancomycin	0	sustained	500	5000	125	mg	qid	10	antibiotic	vancomycin	no	therapeutic	all	adult,olderadult	phase4	0.592179
https://pubmed.ncbi.nlm.nih.gov/24277020	2014	sustained	n/a	goldensyrian	m	58	111	hamster		clindamycin+challenge	cumulativemortality	t	t	87	vpi10463	100000	cfu	spores	0.3	1.5	0.3	mg/kg	qd	5	vancomycin	0	acute	500	5000	125	mg	qid	10	antibiotic	vancomycin	no	therapeutic	all	adult,olderadult	phase3	0.835714
https://pubmed.ncbi.nlm.nih.gov/24277020	2014	sustained	n/a	goldensyrian	m	58	111	hamster		clindamycin+challenge	cumulativemortality	t	t	87	vpi10463	100000	cfu	spores	0.3	1.5	0.3	mg/kg	qd	5	vancomycin	0	sustained	500	5000	125	mg	qid	10	antibiotic	vancomycin	no	therapeutic	all	adult,olderadult	phase3	0.610714
https://pubmed.ncbi.nlm.nih.gov/24277020	2014	sustained	n/a	goldensyrian	m	58	111	hamster		clindamycin+challenge	cumulativemortality	t	t	87	vpi10463	100000	cfu	spores	0.3	1.5	0.3	mg/kg	qd	5	vancomycin	0	acute	500	5000	125	mg	qid	10	antibiotic	vancomycin	no	therapeutic	all	adult,olderadult	phase3	0.818493
https://pubmed.ncbi.nlm.nih.gov/24277020	2014	sustained	n/a	goldensyrian	m	58	111	hamster		clindamycin+challenge	cumulativemortality	t	t	87	vpi10463	100000	cfu	spores	0.3	1.5	0.3	mg/kg	qd	5	vancomycin	0	sustained	500	5000	125	mg	qid	10	antibiotic	vancomycin	no	therapeutic	all	adult,olderadult	phase3	0.589041
https://pubmed.ncbi.nlm.nih.gov/24277020	2014	sustained	n/a	goldensyrian	m	58	111	hamster		clindamycin+challenge	cumulativemortality	t	t	87	vpi10463	100000	cfu	spores	0.3	1.5	0.3	mg/kg	qd	5	vancomycin	0	acute	500	5000	125	mg	qid	10	antibiotic	vancomycin	no	therapeutic	all	adult,olderadult	phase3	0.87963
https://pubmed.ncbi.nlm.nih.gov/24277020	2014	sustained	n/a	goldensyrian	m	58	111	hamster		clindamycin+challenge	cumulativemortality	t	t	87	vpi10463	100000	cfu	spores	0.3	1.5	0.3	mg/kg	qd	5	vancomycin	0	sustained	500	5000	125	mg	qid	10	antibiotic	vancomycin	no	therapeutic	all	adult,olderadult	phase3	0.657407
https://pubmed.ncbi.nlm.nih.gov/24277020	2014	sustained	n/a	goldensyrian	m	58	111	hamster		clindamycin+challenge	cumulativemortality	t	t	87	vpi10463	100000	cfu	spores	0.3	1.5	0.3	mg/kg	qd	5	vancomycin	0	acute	500	5000	125	mg	qid	10	antibiotic	vancomycin	no	therapeutic	all	adult,olderadult	phase3	0.1875
https://pubmed.ncbi.nlm.nih.gov/24277020	2014	sustained	n/a	goldensyrian	m	58	111	hamster		clindamycin+challenge	cumulativemortality	t	t	87	vpi10463	100000	cfu	spores	0.3	1.5	0.3	mg/kg	qd	5	vancomycin	0	sustained	500	5000	125	mg	qid	10	antibiotic	vancomycin	no	therapeutic	all	adult,olderadult	phase3	0.3125
https://pubmed.ncbi.nlm.nih.gov/24277020	2014	sustained	n/a	goldensyrian	m	58	111	hamster		clindamycin+challenge	cumulativemortality	t	t	87	vpi10463	100000	cfu	spores	0.3	1.5	0.3	mg/kg	qd	5	vancomycin	0	acute	500	5000	125	mg	qid	10	antibiotic	vancomycin	yes	therapeutic	all	adult,olderadult	phase2	0.863636
https://pubmed.ncbi.nlm.nih.gov/24277020	2014	sustained	n/a	goldensyrian	m	58	111	hamster		clindamycin+challenge	cumulativemortality	t	t	87	vpi10463	100000	cfu	spores	0.3	1.5	0.3	mg/kg	qd	5	vancomycin	0	sustained	500	5000	125	mg	qid	10	antibiotic	vancomycin	yes	therapeutic	all	adult,olderadult	phase2	0.545455
https://pubmed.ncbi.nlm.nih.gov/24277020	2014	sustained	n/a	goldensyrian	m	58	111	hamster		clindamycin+challenge	cumulativemortality	t	t	87	vpi10463	100000	cfu	spores	0.3	1.5	0.3	mg/kg	qd	5	vancomycin	0	acute	500	5000	125	mg	qid	10	antibiotic	vancomycin	no	therapeutic	all	child	phase3	0.704545
https://pubmed.ncbi.nlm.nih.gov/24277020	2014	sustained	n/a	goldensyrian	m	58	111	hamster		clindamycin+challenge	cumulativemortality	t	t	87	vpi10463	100000	cfu	spores	0.3	1.5	0.3	mg/kg	qd	5	vancomycin	0	sustained	500	5000	125	mg	qid	10	antibiotic	vancomycin	no	therapeutic	all	child	phase3	0.741935
https://pubmed.ncbi.nlm.nih.gov/24277020	2014	sustained	n/a	goldensyrian	m	58	111	hamster		clindamycin+challenge	cumulativemortality	t	t	87	vpi10463	100000	cfu	spores	0.3	1.5	0.3	mg/kg	qd	5	vancomycin	0	acute	500	5000	125	mg	qid	10	antibiotic	vancomycin	no	therapeutic	all	child,adult,olderadult	phase3	0.863281
https://pubmed.ncbi.nlm.nih.gov/24277020	2014	sustained	n/a	goldensyrian	m	58	111	hamster		clindamycin+challenge	cumulativemortality	t	t	87	vpi10463	100000	cfu	spores	0.3	1.5	0.3	mg/kg	qd	5	vancomycin	0	sustained	500	5000	125	mg	qid	10	antibiotic	vancomycin	no	therapeutic	all	child,adult,olderadult	phase3	0.779279
https://pubmed.ncbi.nlm.nih.gov/24277020	2014	sustained	n/a	goldensyrian	m	58	111	hamster		clindamycin+challenge	cumulativemortality	t	t	87	vpi10463	100000	cfu	spores	0.3	1.5	0.3	mg/kg	qd	5	vancomycin	0	acute	500	5000	125	mg	qid	10	antibiotic	vancomycin	no	therapeutic	all	child,adult,olderadult	phase3	0.856678
https://pubmed.ncbi.nlm.nih.gov/24277020	2014	sustained	n/a	goldensyrian	m	58	111	hamster		clindamycin+challenge	cumulativemortality	t	t	87	vpi10463	100000	cfu	spores	0.3	1.5	0.3	mg/kg	qd	5	vancomycin	0	sustained	500	5000	125	mg	qid	10	antibiotic	vancomycin	no	therapeutic	all	child,adult,olderadult	phase3	0.745247
https://pubmed.ncbi.nlm.nih.gov/24277020	2014	sustained	n/a	goldensyrian	m	58	111	hamster		clindamycin+challenge	cumulativemortality	t	t	87	vpi10463	100000	cfu	spores	0.3	1.5	0.3	mg/kg	qd	5	vancomycin	0	acute	500	5000	125	mg	qid	10	antibiotic	vancomycin	no	therapeutic	all	adult,olderadult	phase3	0.634783
https://pubmed.ncbi.nlm.nih.gov/24277020	2014	sustained	n/a	goldensyrian	m	58	111	hamster		clindamycin+challenge	cumulativemortality	t	t	87	vpi10463	100000	cfu	spores	0.3	1.5	0.3	mg/kg	qd	5	vancomycin	0	sustained	500	5000	125	mg	qid	10	antibiotic	vancomycin	no	therapeutic	all	adult,olderadult	phase3	0.863014
https://pubmed.ncbi.nlm.nih.gov/24277020	2014	sustained	n/a	goldensyrian	m	58	111	hamster		clindamycin+challenge	cumulativemortality	t	t	87	vpi10463	100000	cfu	spores	0.3	1.5	0.3	mg/kg	qd	5	vancomycin	0	acute	500	5000	125	mg	qid	10	antibiotic	vancomycin	no	therapeutic	all	adult,olderadult	phase3	0.808
https://pubmed.ncbi.nlm.nih.gov/24277020	2014	sustained	n/a	goldensyrian	m	58	111	hamster		clindamycin+challenge	cumulativemortality	t	t	87	vpi10463	100000	cfu	spores	0.3	1.5	0.3	mg/kg	qd	5	vancomycin	0	sustained	500	5000	125	mg	qid	10	antibiotic	vancomycin	no	therapeutic	all	adult,olderadult	phase3	0.823529
https://pubmed.ncbi.nlm.nih.gov/24277020	2014	sustained	n/a	goldensyrian	m	58	111	hamster		clindamycin+challenge	cumulativemortality	t	t	87	vpi10463	100000	cfu	spores	0.3	1.5	0.3	mg/kg	qd	5	vancomycin	0	acute	500	5000	125	mg	qid	10	antibiotic	vancomycin	no	therapeutic	all	adult,olderadult	phase3	0.80597
https://pubmed.ncbi.nlm.nih.gov/24277020	2014	sustained	n/a	goldensyrian	m	58	111	hamster		clindamycin+challenge	cumulativemortality	t	t	87	vpi10463	100000	cfu	spores	0.3	1.5	0.3	mg/kg	qd	5	vancomycin	0	sustained	500	5000	125	mg	qid	10	antibiotic	vancomycin	no	therapeutic	all	adult,olderadult	phase3	0.757009
https://pubmed.ncbi.nlm.nih.gov/24277020	2014	sustained	n/a	goldensyrian	m	58	111	hamster		clindamycin+challenge	cumulativemortality	t	t	87	vpi10463	100000	cfu	spores	0.3	1.5	0.3	mg/kg	qd	5	vancomycin	0	acute	500	5000	125	mg	qid	10	antibiotic	vancomycin	no	therapeutic	all	adult,olderadult	phase2	0.69697
https://pubmed.ncbi.nlm.nih.gov/24277020	2014	sustained	n/a	goldensyrian	m	58	111	hamster		clindamycin+challenge	cumulativemortality	t	t	87	vpi10463	100000	cfu	spores	0.3	1.5	0.3	mg/kg	qd	5	vancomycin	0	sustained	500	5000	125	mg	qid	10	antibiotic	vancomycin	no	therapeutic	all	adult,olderadult	phase2	0.608696
https://pubmed.ncbi.nlm.nih.gov/24277020	2014	sustained	n/a	goldensyrian	m	58	111	hamster		clindamycin+challenge	cumulativemortality	t	t	87	vpi10463	100000	cfu	spores	0.3	1.5	0.3	mg/kg	qd	5	vancomycin	0	acute	500	5000	125	mg	qid	10	antibiotic	vancomycin	no	therapeutic	all	adult,olderadult	phase4	0.666667
https://pubmed.ncbi.nlm.nih.gov/24277020	2014	sustained	n/a	goldensyrian	m	58	111	hamster		clindamycin+challenge	cumulativemortality	t	t	87	vpi10463	100000	cfu	spores	0.3	1.5	0.3	mg/kg	qd	5	vancomycin	0	acute	500	5000	125	mg	qid	10	antibiotic	vancomycin	no	therapeutic	all	adult,olderadult	phase4	1
https://pubmed.ncbi.nlm.nih.gov/24277020	2014	sustained	n/a	goldensyrian	m	58	111	hamster		clindamycin+challenge	cumulativemortality	t	t	87	vpi10463	100000	cfu	spores	0.3	1.5	0.3	mg/kg	qd	5	vancomycin	0	sustained							control	vancomycin	no	therapeutic	all	adult,olderadult	phase3	0.740741
https://pubmed.ncbi.nlm.nih.gov/24277020	2014	sustained	n/a	goldensyrian	m	58	111	hamster		clindamycin+challenge	cumulativemortality	t	t	87	vpi10463	100000	cfu	spores	0.3	1.5	0.3	mg/kg	qd	5	vancomycin	0	sustained							antibiotic	vancomycin	no	therapeutic	all	adult,olderadult	phase3	0.721519
https://pubmed.ncbi.nlm.nih.gov/24277020	2014	sustained	n/a	goldensyrian	m	58	111	hamster		clindamycin+challenge	cumulativemortality	t	t	87	vpi10463	100000	cfu	spores	0.3	1.5	0.3	mg/kg	qd	5	vancomycin	0	sustained							antibiotic	vancomycin	no	therapeutic	all	adult,olderadult	phase2	0.263158
https://pubmed.ncbi.nlm.nih.gov/24277020	2014	sustained	n/a	goldensyrian	m	58	111	hamster		clindamycin+challenge	cumulativemortality	t	t	87	vpi10463	100000	cfu	spores	0.3	1.5	0.3	mg/kg	qd	5	vancomycin	0	acute							antibiotic	vancomycin	no	therapeutic	all	adult,olderadult	phase2	0.306667
https://pubmed.ncbi.nlm.nih.gov/24277020	2014	sustained	n/a	goldensyrian	m	58	111	hamster		clindamycin+challenge	cumulativemortality	t	t	87	vpi10463	100000	cfu	spores	0.3	1.5	0.3	mg/kg	qd	5	vancomycin	0	sustained							antibiotic	vancomycin	no	therapeutic	all	adult,olderadult	phase2	0.306667
https://pubmed.ncbi.nlm.nih.gov/24277020	2014	sustained	n/a	goldensyrian	m	58	111	hamster		clindamycin+challenge	cumulativemortality	t	t	87	vpi10463	100000	cfu	spores	12.5	62.5	12.5	mg/kg	qd	5	vancomycin	0.3	acute	500	5000	125	mg	qid	10	antibiotic	vancomycin	yes	therapeutic	all	adult,olderadult	phase2	0.893939
https://pubmed.ncbi.nlm.nih.gov/24277020	2014	sustained	n/a	goldensyrian	m	58	111	hamster		clindamycin+challenge	cumulativemortality	t	t	87	vpi10463	100000	cfu	spores	12.5	62.5	12.5	mg/kg	qd	5	vancomycin	0.3	sustained	500	5000	125	mg	qid	10	antibiotic	vancomycin	yes	therapeutic	all	adult,olderadult	phase2	0.644068
https://pubmed.ncbi.nlm.nih.gov/24277020	2014	sustained	n/a	goldensyrian	m	58	111	hamster		clindamycin+challenge	cumulativemortality	t	t	87	vpi10463	100000	cfu	spores	12.5	62.5	12.5	mg/kg	qd	5	vancomycin	0.3	sustained	125		125	mg	qd		antibiotic	vancomycin	no	prophylactic	all	olderadult	phase4	1
https://pubmed.ncbi.nlm.nih.gov/24277020	2014	sustained	n/a	goldensyrian	m	58	111	hamster		clindamycin+challenge	cumulativemortality	t	t	87	vpi10463	100000	cfu	spores	12.5	62.5	12.5	mg/kg	qd	5	vancomycin	0.3	acute	500	5000	125	mg	qid	10	antibiotic	vancomycin	no	therapeutic	all	adult,olderadult	phase3	0.853821
https://pubmed.ncbi.nlm.nih.gov/24277020	2014	sustained	n/a	goldensyrian	m	58	111	hamster		clindamycin+challenge	cumulativemortality	t	t	87	vpi10463	100000	cfu	spores	12.5	62.5	12.5	mg/kg	qd	5	vancomycin	0.3	sustained	500	5000	125	mg	qid	10	antibiotic	vancomycin	no	therapeutic	all	adult,olderadult	phase3	0.61794
https://pubmed.ncbi.nlm.nih.gov/24277020	2014	sustained	n/a	goldensyrian	m	58	111	hamster		clindamycin+challenge	cumulativemortality	t	t	87	vpi10463	100000	cfu	spores	12.5	62.5	12.5	mg/kg	qd	5	vancomycin	0.3	acute	500	5000	125	mg	qid	10	antibiotic	vancomycin	no	therapeutic	all	adult,olderadult	phase3	0.849057
https://pubmed.ncbi.nlm.nih.gov/24277020	2014	sustained	n/a	goldensyrian	m	58	111	hamster		clindamycin+challenge	cumulativemortality	t	t	87	vpi10463	100000	cfu	spores	12.5	62.5	12.5	mg/kg	qd	5	vancomycin	0.3	sustained	500	5000	125	mg	qid	10	antibiotic	vancomycin	no	therapeutic	all	adult,olderadult	phase3	0.622642
https://pubmed.ncbi.nlm.nih.gov/24277020	2014	sustained	n/a	goldensyrian	m	58	111	hamster		clindamycin+challenge	cumulativemortality	t	t	87	vpi10463	100000	cfu	spores	12.5	62.5	12.5	mg/kg	qd	5	vancomycin	0.3	acute	500	5000	125	mg	qid	10	antibiotic	vancomycin	no	therapeutic	all	adult,olderadult	phase4	0.821229
https://pubmed.ncbi.nlm.nih.gov/24277020	2014	sustained	n/a	goldensyrian	m	58	111	hamster		clindamycin+challenge	cumulativemortality	t	t	87	vpi10463	100000	cfu	spores	12.5	62.5	12.5	mg/kg	qd	5	vancomycin	0.3	sustained	500	5000	125	mg	qid	10	antibiotic	vancomycin	no	therapeutic	all	adult,olderadult	phase4	0.592179
https://pubmed.ncbi.nlm.nih.gov/24277020	2014	sustained	n/a	goldensyrian	m	58	111	hamster		clindamycin+challenge	cumulativemortality	t	t	87	vpi10463	100000	cfu	spores	12.5	62.5	12.5	mg/kg	qd	5	vancomycin	0.3	acute	500	5000	125	mg	qid	10	antibiotic	vancomycin	no	therapeutic	all	adult,olderadult	phase3	0.835714
https://pubmed.ncbi.nlm.nih.gov/24277020	2014	sustained	n/a	goldensyrian	m	58	111	hamster		clindamycin+challenge	cumulativemortality	t	t	87	vpi10463	100000	cfu	spores	12.5	62.5	12.5	mg/kg	qd	5	vancomycin	0.3	sustained	500	5000	125	mg	qid	10	antibiotic	vancomycin	no	therapeutic	all	adult,olderadult	phase3	0.610714
https://pubmed.ncbi.nlm.nih.gov/24277020	2014	sustained	n/a	goldensyrian	m	58	111	hamster		clindamycin+challenge	cumulativemortality	t	t	87	vpi10463	100000	cfu	spores	12.5	62.5	12.5	mg/kg	qd	5	vancomycin	0.3	acute	500	5000	125	mg	qid	10	antibiotic	vancomycin	no	therapeutic	all	adult,olderadult	phase3	0.818493
https://pubmed.ncbi.nlm.nih.gov/24277020	2014	sustained	n/a	goldensyrian	m	58	111	hamster		clindamycin+challenge	cumulativemortality	t	t	87	vpi10463	100000	cfu	spores	12.5	62.5	12.5	mg/kg	qd	5	vancomycin	0.3	sustained	500	5000	125	mg	qid	10	antibiotic	vancomycin	no	therapeutic	all	adult,olderadult	phase3	0.589041
https://pubmed.ncbi.nlm.nih.gov/24277020	2014	sustained	n/a	goldensyrian	m	58	111	hamster		clindamycin+challenge	cumulativemortality	t	t	87	vpi10463	100000	cfu	spores	12.5	62.5	12.5	mg/kg	qd	5	vancomycin	0.3	acute	500	5000	125	mg	qid	10	antibiotic	vancomycin	no	therapeutic	all	adult,olderadult	phase3	0.87963
https://pubmed.ncbi.nlm.nih.gov/24277020	2014	sustained	n/a	goldensyrian	m	58	111	hamster		clindamycin+challenge	cumulativemortality	t	t	87	vpi10463	100000	cfu	spores	12.5	62.5	12.5	mg/kg	qd	5	vancomycin	0.3	sustained	500	5000	125	mg	qid	10	antibiotic	vancomycin	no	therapeutic	all	adult,olderadult	phase3	0.657407
https://pubmed.ncbi.nlm.nih.gov/24277020	2014	sustained	n/a	goldensyrian	m	58	111	hamster		clindamycin+challenge	cumulativemortality	t	t	87	vpi10463	100000	cfu	spores	12.5	62.5	12.5	mg/kg	qd	5	vancomycin	0.3	acute	500	5000	125	mg	qid	10	antibiotic	vancomycin	no	therapeutic	all	adult,olderadult	phase3	0.1875
https://pubmed.ncbi.nlm.nih.gov/24277020	2014	sustained	n/a	goldensyrian	m	58	111	hamster		clindamycin+challenge	cumulativemortality	t	t	87	vpi10463	100000	cfu	spores	12.5	62.5	12.5	mg/kg	qd	5	vancomycin	0.3	sustained	500	5000	125	mg	qid	10	antibiotic	vancomycin	no	therapeutic	all	adult,olderadult	phase3	0.3125
https://pubmed.ncbi.nlm.nih.gov/24277020	2014	sustained	n/a	goldensyrian	m	58	111	hamster		clindamycin+challenge	cumulativemortality	t	t	87	vpi10463	100000	cfu	spores	12.5	62.5	12.5	mg/kg	qd	5	vancomycin	0.3	acute	500	5000	125	mg	qid	10	antibiotic	vancomycin	yes	therapeutic	all	adult,olderadult	phase2	0.863636
https://pubmed.ncbi.nlm.nih.gov/24277020	2014	sustained	n/a	goldensyrian	m	58	111	hamster		clindamycin+challenge	cumulativemortality	t	t	87	vpi10463	100000	cfu	spores	12.5	62.5	12.5	mg/kg	qd	5	vancomycin	0.3	sustained	500	5000	125	mg	qid	10	antibiotic	vancomycin	yes	therapeutic	all	adult,olderadult	phase2	0.545455
https://pubmed.ncbi.nlm.nih.gov/24277020	2014	sustained	n/a	goldensyrian	m	58	111	hamster		clindamycin+challenge	cumulativemortality	t	t	87	vpi10463	100000	cfu	spores	12.5	62.5	12.5	mg/kg	qd	5	vancomycin	0.3	acute	500	5000	125	mg	qid	10	antibiotic	vancomycin	no	therapeutic	all	child	phase3	0.704545
https://pubmed.ncbi.nlm.nih.gov/24277020	2014	sustained	n/a	goldensyrian	m	58	111	hamster		clindamycin+challenge	cumulativemortality	t	t	87	vpi10463	100000	cfu	spores	12.5	62.5	12.5	mg/kg	qd	5	vancomycin	0.3	sustained	500	5000	125	mg	qid	10	antibiotic	vancomycin	no	therapeutic	all	child	phase3	0.741935
https://pubmed.ncbi.nlm.nih.gov/24277020	2014	sustained	n/a	goldensyrian	m	58	111	hamster		clindamycin+challenge	cumulativemortality	t	t	87	vpi10463	100000	cfu	spores	12.5	62.5	12.5	mg/kg	qd	5	vancomycin	0.3	acute	500	5000	125	mg	qid	10	antibiotic	vancomycin	no	therapeutic	all	child,adult,olderadult	phase3	0.863281
https://pubmed.ncbi.nlm.nih.gov/24277020	2014	sustained	n/a	goldensyrian	m	58	111	hamster		clindamycin+challenge	cumulativemortality	t	t	87	vpi10463	100000	cfu	spores	12.5	62.5	12.5	mg/kg	qd	5	vancomycin	0.3	sustained	500	5000	125	mg	qid	10	antibiotic	vancomycin	no	therapeutic	all	child,adult,olderadult	phase3	0.779279
https://pubmed.ncbi.nlm.nih.gov/24277020	2014	sustained	n/a	goldensyrian	m	58	111	hamster		clindamycin+challenge	cumulativemortality	t	t	87	vpi10463	100000	cfu	spores	12.5	62.5	12.5	mg/kg	qd	5	vancomycin	0.3	acute	500	5000	125	mg	qid	10	antibiotic	vancomycin	no	therapeutic	all	child,adult,olderadult	phase3	0.856678
https://pubmed.ncbi.nlm.nih.gov/24277020	2014	sustained	n/a	goldensyrian	m	58	111	hamster		clindamycin+challenge	cumulativemortality	t	t	87	vpi10463	100000	cfu	spores	12.5	62.5	12.5	mg/kg	qd	5	vancomycin	0.3	sustained	500	5000	125	mg	qid	10	antibiotic	vancomycin	no	therapeutic	all	child,adult,olderadult	phase3	0.745247
https://pubmed.ncbi.nlm.nih.gov/24277020	2014	sustained	n/a	goldensyrian	m	58	111	hamster		clindamycin+challenge	cumulativemortality	t	t	87	vpi10463	100000	cfu	spores	12.5	62.5	12.5	mg/kg	qd	5	vancomycin	0.3	acute	500	5000	125	mg	qid	10	antibiotic	vancomycin	no	therapeutic	all	adult,olderadult	phase3	0.634783
https://pubmed.ncbi.nlm.nih.gov/24277020	2014	sustained	n/a	goldensyrian	m	58	111	hamster		clindamycin+challenge	cumulativemortality	t	t	87	vpi10463	100000	cfu	spores	12.5	62.5	12.5	mg/kg	qd	5	vancomycin	0.3	sustained	500	5000	125	mg	qid	10	antibiotic	vancomycin	no	therapeutic	all	adult,olderadult	phase3	0.863014
https://pubmed.ncbi.nlm.nih.gov/24277020	2014	sustained	n/a	goldensyrian	m	58	111	hamster		clindamycin+challenge	cumulativemortality	t	t	87	vpi10463	100000	cfu	spores	12.5	62.5	12.5	mg/kg	qd	5	vancomycin	0.3	acute	500	5000	125	mg	qid	10	antibiotic	vancomycin	no	therapeutic	all	adult,olderadult	phase3	0.808
https://pubmed.ncbi.nlm.nih.gov/24277020	2014	sustained	n/a	goldensyrian	m	58	111	hamster		clindamycin+challenge	cumulativemortality	t	t	87	vpi10463	100000	cfu	spores	12.5	62.5	12.5	mg/kg	qd	5	vancomycin	0.3	sustained	500	5000	125	mg	qid	10	antibiotic	vancomycin	no	therapeutic	all	adult,olderadult	phase3	0.823529
https://pubmed.ncbi.nlm.nih.gov/24277020	2014	sustained	n/a	goldensyrian	m	58	111	hamster		clindamycin+challenge	cumulativemortality	t	t	87	vpi10463	100000	cfu	spores	12.5	62.5	12.5	mg/kg	qd	5	vancomycin	0.3	acute	500	5000	125	mg	qid	10	antibiotic	vancomycin	no	therapeutic	all	adult,olderadult	phase3	0.80597
https://pubmed.ncbi.nlm.nih.gov/24277020	2014	sustained	n/a	goldensyrian	m	58	111	hamster		clindamycin+challenge	cumulativemortality	t	t	87	vpi10463	100000	cfu	spores	12.5	62.5	12.5	mg/kg	qd	5	vancomycin	0.3	sustained	500	5000	125	mg	qid	10	antibiotic	vancomycin	no	therapeutic	all	adult,olderadult	phase3	0.757009
https://pubmed.ncbi.nlm.nih.gov/24277020	2014	sustained	n/a	goldensyrian	m	58	111	hamster		clindamycin+challenge	cumulativemortality	t	t	87	vpi10463	100000	cfu	spores	12.5	62.5	12.5	mg/kg	qd	5	vancomycin	0.3	acute	500	5000	125	mg	qid	10	antibiotic	vancomycin	no	therapeutic	all	adult,olderadult	phase2	0.69697
https://pubmed.ncbi.nlm.nih.gov/24277020	2014	sustained	n/a	goldensyrian	m	58	111	hamster		clindamycin+challenge	cumulativemortality	t	t	87	vpi10463	100000	cfu	spores	12.5	62.5	12.5	mg/kg	qd	5	vancomycin	0.3	sustained	500	5000	125	mg	qid	10	antibiotic	vancomycin	no	therapeutic	all	adult,olderadult	phase2	0.608696
https://pubmed.ncbi.nlm.nih.gov/24277020	2014	sustained	n/a	goldensyrian	m	58	111	hamster		clindamycin+challenge	cumulativemortality	t	t	87	vpi10463	100000	cfu	spores	12.5	62.5	12.5	mg/kg	qd	5	vancomycin	0.3	acute	500	5000	125	mg	qid	10	antibiotic	vancomycin	no	therapeutic	all	adult,olderadult	phase4	0.666667
https://pubmed.ncbi.nlm.nih.gov/24277020	2014	sustained	n/a	goldensyrian	m	58	111	hamster		clindamycin+challenge	cumulativemortality	t	t	87	vpi10463	100000	cfu	spores	12.5	62.5	12.5	mg/kg	qd	5	vancomycin	0.3	acute	500	5000	125	mg	qid	10	antibiotic	vancomycin	no	therapeutic	all	adult,olderadult	phase4	1
https://pubmed.ncbi.nlm.nih.gov/24277020	2014	sustained	n/a	goldensyrian	m	58	111	hamster		clindamycin+challenge	cumulativemortality	t	t	87	vpi10463	100000	cfu	spores	12.5	62.5	12.5	mg/kg	qd	5	vancomycin	0.3	sustained							control	vancomycin	no	therapeutic	all	adult,olderadult	phase3	0.740741
https://pubmed.ncbi.nlm.nih.gov/24277020	2014	sustained	n/a	goldensyrian	m	58	111	hamster		clindamycin+challenge	cumulativemortality	t	t	87	vpi10463	100000	cfu	spores	12.5	62.5	12.5	mg/kg	qd	5	vancomycin	0.3	sustained							antibiotic	vancomycin	no	therapeutic	all	adult,olderadult	phase3	0.721519
https://pubmed.ncbi.nlm.nih.gov/24277020	2014	sustained	n/a	goldensyrian	m	58	111	hamster		clindamycin+challenge	cumulativemortality	t	t	87	vpi10463	100000	cfu	spores	12.5	62.5	12.5	mg/kg	qd	5	vancomycin	0.3	sustained							antibiotic	vancomycin	no	therapeutic	all	adult,olderadult	phase2	0.263158
https://pubmed.ncbi.nlm.nih.gov/24277020	2014	sustained	n/a	goldensyrian	m	58	111	hamster		clindamycin+challenge	cumulativemortality	t	t	87	vpi10463	100000	cfu	spores	12.5	62.5	12.5	mg/kg	qd	5	vancomycin	0.3	acute							antibiotic	vancomycin	no	therapeutic	all	adult,olderadult	phase2	0.306667
https://pubmed.ncbi.nlm.nih.gov/24277020	2014	sustained	n/a	goldensyrian	m	58	111	hamster		clindamycin+challenge	cumulativemortality	t	t	87	vpi10463	100000	cfu	spores	12.5	62.5	12.5	mg/kg	qd	5	vancomycin	0.3	sustained							antibiotic	vancomycin	no	therapeutic	all	adult,olderadult	phase2	0.306667
https://pubmed.ncbi.nlm.nih.gov/24277020	2014	sustained	n/a	goldensyrian	m	58	111	hamster		clindamycin+challenge	cumulativemortality	t	t	87	vpi10463	100000	cfu	spores	25	125	25	mg/kg	qd	5	vancomycin	0.4	acute	500	5000	125	mg	qid	10	antibiotic	vancomycin	yes	therapeutic	all	adult,olderadult	phase2	0.893939
https://pubmed.ncbi.nlm.nih.gov/24277020	2014	sustained	n/a	goldensyrian	m	58	111	hamster		clindamycin+challenge	cumulativemortality	t	t	87	vpi10463	100000	cfu	spores	25	125	25	mg/kg	qd	5	vancomycin	0.4	sustained	500	5000	125	mg	qid	10	antibiotic	vancomycin	yes	therapeutic	all	adult,olderadult	phase2	0.644068
https://pubmed.ncbi.nlm.nih.gov/24277020	2014	sustained	n/a	goldensyrian	m	58	111	hamster		clindamycin+challenge	cumulativemortality	t	t	87	vpi10463	100000	cfu	spores	25	125	25	mg/kg	qd	5	vancomycin	0.4	sustained	125		125	mg	qd		antibiotic	vancomycin	no	prophylactic	all	olderadult	phase4	1
https://pubmed.ncbi.nlm.nih.gov/24277020	2014	sustained	n/a	goldensyrian	m	58	111	hamster		clindamycin+challenge	cumulativemortality	t	t	87	vpi10463	100000	cfu	spores	25	125	25	mg/kg	qd	5	vancomycin	0.4	acute	500	5000	125	mg	qid	10	antibiotic	vancomycin	no	therapeutic	all	adult,olderadult	phase3	0.853821
https://pubmed.ncbi.nlm.nih.gov/24277020	2014	sustained	n/a	goldensyrian	m	58	111	hamster		clindamycin+challenge	cumulativemortality	t	t	87	vpi10463	100000	cfu	spores	25	125	25	mg/kg	qd	5	vancomycin	0.4	sustained	500	5000	125	mg	qid	10	antibiotic	vancomycin	no	therapeutic	all	adult,olderadult	phase3	0.61794
https://pubmed.ncbi.nlm.nih.gov/24277020	2014	sustained	n/a	goldensyrian	m	58	111	hamster		clindamycin+challenge	cumulativemortality	t	t	87	vpi10463	100000	cfu	spores	25	125	25	mg/kg	qd	5	vancomycin	0.4	acute	500	5000	125	mg	qid	10	antibiotic	vancomycin	no	therapeutic	all	adult,olderadult	phase3	0.849057
https://pubmed.ncbi.nlm.nih.gov/24277020	2014	sustained	n/a	goldensyrian	m	58	111	hamster		clindamycin+challenge	cumulativemortality	t	t	87	vpi10463	100000	cfu	spores	25	125	25	mg/kg	qd	5	vancomycin	0.4	sustained	500	5000	125	mg	qid	10	antibiotic	vancomycin	no	therapeutic	all	adult,olderadult	phase3	0.622642
https://pubmed.ncbi.nlm.nih.gov/24277020	2014	sustained	n/a	goldensyrian	m	58	111	hamster		clindamycin+challenge	cumulativemortality	t	t	87	vpi10463	100000	cfu	spores	25	125	25	mg/kg	qd	5	vancomycin	0.4	acute	500	5000	125	mg	qid	10	antibiotic	vancomycin	no	therapeutic	all	adult,olderadult	phase4	0.821229
https://pubmed.ncbi.nlm.nih.gov/24277020	2014	sustained	n/a	goldensyrian	m	58	111	hamster		clindamycin+challenge	cumulativemortality	t	t	87	vpi10463	100000	cfu	spores	25	125	25	mg/kg	qd	5	vancomycin	0.4	sustained	500	5000	125	mg	qid	10	antibiotic	vancomycin	no	therapeutic	all	adult,olderadult	phase4	0.592179
https://pubmed.ncbi.nlm.nih.gov/24277020	2014	sustained	n/a	goldensyrian	m	58	111	hamster		clindamycin+challenge	cumulativemortality	t	t	87	vpi10463	100000	cfu	spores	25	125	25	mg/kg	qd	5	vancomycin	0.4	acute	500	5000	125	mg	qid	10	antibiotic	vancomycin	no	therapeutic	all	adult,olderadult	phase3	0.835714
https://pubmed.ncbi.nlm.nih.gov/24277020	2014	sustained	n/a	goldensyrian	m	58	111	hamster		clindamycin+challenge	cumulativemortality	t	t	87	vpi10463	100000	cfu	spores	25	125	25	mg/kg	qd	5	vancomycin	0.4	sustained	500	5000	125	mg	qid	10	antibiotic	vancomycin	no	therapeutic	all	adult,olderadult	phase3	0.610714
https://pubmed.ncbi.nlm.nih.gov/24277020	2014	sustained	n/a	goldensyrian	m	58	111	hamster		clindamycin+challenge	cumulativemortality	t	t	87	vpi10463	100000	cfu	spores	25	125	25	mg/kg	qd	5	vancomycin	0.4	acute	500	5000	125	mg	qid	10	antibiotic	vancomycin	no	therapeutic	all	adult,olderadult	phase3	0.818493
https://pubmed.ncbi.nlm.nih.gov/24277020	2014	sustained	n/a	goldensyrian	m	58	111	hamster		clindamycin+challenge	cumulativemortality	t	t	87	vpi10463	100000	cfu	spores	25	125	25	mg/kg	qd	5	vancomycin	0.4	sustained	500	5000	125	mg	qid	10	antibiotic	vancomycin	no	therapeutic	all	adult,olderadult	phase3	0.589041
https://pubmed.ncbi.nlm.nih.gov/24277020	2014	sustained	n/a	goldensyrian	m	58	111	hamster		clindamycin+challenge	cumulativemortality	t	t	87	vpi10463	100000	cfu	spores	25	125	25	mg/kg	qd	5	vancomycin	0.4	acute	500	5000	125	mg	qid	10	antibiotic	vancomycin	no	therapeutic	all	adult,olderadult	phase3	0.87963
https://pubmed.ncbi.nlm.nih.gov/24277020	2014	sustained	n/a	goldensyrian	m	58	111	hamster		clindamycin+challenge	cumulativemortality	t	t	87	vpi10463	100000	cfu	spores	25	125	25	mg/kg	qd	5	vancomycin	0.4	sustained	500	5000	125	mg	qid	10	antibiotic	vancomycin	no	therapeutic	all	adult,olderadult	phase3	0.657407
https://pubmed.ncbi.nlm.nih.gov/24277020	2014	sustained	n/a	goldensyrian	m	58	111	hamster		clindamycin+challenge	cumulativemortality	t	t	87	vpi10463	100000	cfu	spores	25	125	25	mg/kg	qd	5	vancomycin	0.4	acute	500	5000	125	mg	qid	10	antibiotic	vancomycin	no	therapeutic	all	adult,olderadult	phase3	0.1875
https://pubmed.ncbi.nlm.nih.gov/24277020	2014	sustained	n/a	goldensyrian	m	58	111	hamster		clindamycin+challenge	cumulativemortality	t	t	87	vpi10463	100000	cfu	spores	25	125	25	mg/kg	qd	5	vancomycin	0.4	sustained	500	5000	125	mg	qid	10	antibiotic	vancomycin	no	therapeutic	all	adult,olderadult	phase3	0.3125
https://pubmed.ncbi.nlm.nih.gov/24277020	2014	sustained	n/a	goldensyrian	m	58	111	hamster		clindamycin+challenge	cumulativemortality	t	t	87	vpi10463	100000	cfu	spores	25	125	25	mg/kg	qd	5	vancomycin	0.4	acute	500	5000	125	mg	qid	10	antibiotic	vancomycin	yes	therapeutic	all	adult,olderadult	phase2	0.863636
https://pubmed.ncbi.nlm.nih.gov/24277020	2014	sustained	n/a	goldensyrian	m	58	111	hamster		clindamycin+challenge	cumulativemortality	t	t	87	vpi10463	100000	cfu	spores	25	125	25	mg/kg	qd	5	vancomycin	0.4	sustained	500	5000	125	mg	qid	10	antibiotic	vancomycin	yes	therapeutic	all	adult,olderadult	phase2	0.545455
https://pubmed.ncbi.nlm.nih.gov/24277020	2014	sustained	n/a	goldensyrian	m	58	111	hamster		clindamycin+challenge	cumulativemortality	t	t	87	vpi10463	100000	cfu	spores	25	125	25	mg/kg	qd	5	vancomycin	0.4	acute	500	5000	125	mg	qid	10	antibiotic	vancomycin	no	therapeutic	all	child	phase3	0.704545
https://pubmed.ncbi.nlm.nih.gov/24277020	2014	sustained	n/a	goldensyrian	m	58	111	hamster		clindamycin+challenge	cumulativemortality	t	t	87	vpi10463	100000	cfu	spores	25	125	25	mg/kg	qd	5	vancomycin	0.4	sustained	500	5000	125	mg	qid	10	antibiotic	vancomycin	no	therapeutic	all	child	phase3	0.741935
https://pubmed.ncbi.nlm.nih.gov/24277020	2014	sustained	n/a	goldensyrian	m	58	111	hamster		clindamycin+challenge	cumulativemortality	t	t	87	vpi10463	100000	cfu	spores	25	125	25	mg/kg	qd	5	vancomycin	0.4	acute	500	5000	125	mg	qid	10	antibiotic	vancomycin	no	therapeutic	all	child,adult,olderadult	phase3	0.863281
https://pubmed.ncbi.nlm.nih.gov/24277020	2014	sustained	n/a	goldensyrian	m	58	111	hamster		clindamycin+challenge	cumulativemortality	t	t	87	vpi10463	100000	cfu	spores	25	125	25	mg/kg	qd	5	vancomycin	0.4	sustained	500	5000	125	mg	qid	10	antibiotic	vancomycin	no	therapeutic	all	child,adult,olderadult	phase3	0.779279
https://pubmed.ncbi.nlm.nih.gov/24277020	2014	sustained	n/a	goldensyrian	m	58	111	hamster		clindamycin+challenge	cumulativemortality	t	t	87	vpi10463	100000	cfu	spores	25	125	25	mg/kg	qd	5	vancomycin	0.4	acute	500	5000	125	mg	qid	10	antibiotic	vancomycin	no	therapeutic	all	child,adult,olderadult	phase3	0.856678
https://pubmed.ncbi.nlm.nih.gov/24277020	2014	sustained	n/a	goldensyrian	m	58	111	hamster		clindamycin+challenge	cumulativemortality	t	t	87	vpi10463	100000	cfu	spores	25	125	25	mg/kg	qd	5	vancomycin	0.4	sustained	500	5000	125	mg	qid	10	antibiotic	vancomycin	no	therapeutic	all	child,adult,olderadult	phase3	0.745247
https://pubmed.ncbi.nlm.nih.gov/24277020	2014	sustained	n/a	goldensyrian	m	58	111	hamster		clindamycin+challenge	cumulativemortality	t	t	87	vpi10463	100000	cfu	spores	25	125	25	mg/kg	qd	5	vancomycin	0.4	acute	500	5000	125	mg	qid	10	antibiotic	vancomycin	no	therapeutic	all	adult,olderadult	phase3	0.634783
https://pubmed.ncbi.nlm.nih.gov/24277020	2014	sustained	n/a	goldensyrian	m	58	111	hamster		clindamycin+challenge	cumulativemortality	t	t	87	vpi10463	100000	cfu	spores	25	125	25	mg/kg	qd	5	vancomycin	0.4	sustained	500	5000	125	mg	qid	10	antibiotic	vancomycin	no	therapeutic	all	adult,olderadult	phase3	0.863014
https://pubmed.ncbi.nlm.nih.gov/24277020	2014	sustained	n/a	goldensyrian	m	58	111	hamster		clindamycin+challenge	cumulativemortality	t	t	87	vpi10463	100000	cfu	spores	25	125	25	mg/kg	qd	5	vancomycin	0.4	acute	500	5000	125	mg	qid	10	antibiotic	vancomycin	no	therapeutic	all	adult,olderadult	phase3	0.808
https://pubmed.ncbi.nlm.nih.gov/24277020	2014	sustained	n/a	goldensyrian	m	58	111	hamster		clindamycin+challenge	cumulativemortality	t	t	87	vpi10463	100000	cfu	spores	25	125	25	mg/kg	qd	5	vancomycin	0.4	sustained	500	5000	125	mg	qid	10	antibiotic	vancomycin	no	therapeutic	all	adult,olderadult	phase3	0.823529
https://pubmed.ncbi.nlm.nih.gov/24277020	2014	sustained	n/a	goldensyrian	m	58	111	hamster		clindamycin+challenge	cumulativemortality	t	t	87	vpi10463	100000	cfu	spores	25	125	25	mg/kg	qd	5	vancomycin	0.4	acute	500	5000	125	mg	qid	10	antibiotic	vancomycin	no	therapeutic	all	adult,olderadult	phase3	0.80597
https://pubmed.ncbi.nlm.nih.gov/24277020	2014	sustained	n/a	goldensyrian	m	58	111	hamster		clindamycin+challenge	cumulativemortality	t	t	87	vpi10463	100000	cfu	spores	25	125	25	mg/kg	qd	5	vancomycin	0.4	sustained	500	5000	125	mg	qid	10	antibiotic	vancomycin	no	therapeutic	all	adult,olderadult	phase3	0.757009
https://pubmed.ncbi.nlm.nih.gov/24277020	2014	sustained	n/a	goldensyrian	m	58	111	hamster		clindamycin+challenge	cumulativemortality	t	t	87	vpi10463	100000	cfu	spores	25	125	25	mg/kg	qd	5	vancomycin	0.4	acute	500	5000	125	mg	qid	10	antibiotic	vancomycin	no	therapeutic	all	adult,olderadult	phase2	0.69697
https://pubmed.ncbi.nlm.nih.gov/24277020	2014	sustained	n/a	goldensyrian	m	58	111	hamster		clindamycin+challenge	cumulativemortality	t	t	87	vpi10463	100000	cfu	spores	25	125	25	mg/kg	qd	5	vancomycin	0.4	sustained	500	5000	125	mg	qid	10	antibiotic	vancomycin	no	therapeutic	all	adult,olderadult	phase2	0.608696
https://pubmed.ncbi.nlm.nih.gov/24277020	2014	sustained	n/a	goldensyrian	m	58	111	hamster		clindamycin+challenge	cumulativemortality	t	t	87	vpi10463	100000	cfu	spores	25	125	25	mg/kg	qd	5	vancomycin	0.4	acute	500	5000	125	mg	qid	10	antibiotic	vancomycin	no	therapeutic	all	adult,olderadult	phase4	0.666667
https://pubmed.ncbi.nlm.nih.gov/24277020	2014	sustained	n/a	goldensyrian	m	58	111	hamster		clindamycin+challenge	cumulativemortality	t	t	87	vpi10463	100000	cfu	spores	25	125	25	mg/kg	qd	5	vancomycin	0.4	acute	500	5000	125	mg	qid	10	antibiotic	vancomycin	no	therapeutic	all	adult,olderadult	phase4	1
https://pubmed.ncbi.nlm.nih.gov/24277020	2014	sustained	n/a	goldensyrian	m	58	111	hamster		clindamycin+challenge	cumulativemortality	t	t	87	vpi10463	100000	cfu	spores	25	125	25	mg/kg	qd	5	vancomycin	0.4	sustained							control	vancomycin	no	therapeutic	all	adult,olderadult	phase3	0.740741
https://pubmed.ncbi.nlm.nih.gov/24277020	2014	sustained	n/a	goldensyrian	m	58	111	hamster		clindamycin+challenge	cumulativemortality	t	t	87	vpi10463	100000	cfu	spores	25	125	25	mg/kg	qd	5	vancomycin	0.4	sustained							antibiotic	vancomycin	no	therapeutic	all	adult,olderadult	phase3	0.721519
https://pubmed.ncbi.nlm.nih.gov/24277020	2014	sustained	n/a	goldensyrian	m	58	111	hamster		clindamycin+challenge	cumulativemortality	t	t	87	vpi10463	100000	cfu	spores	25	125	25	mg/kg	qd	5	vancomycin	0.4	sustained							antibiotic	vancomycin	no	therapeutic	all	adult,olderadult	phase2	0.263158
https://pubmed.ncbi.nlm.nih.gov/24277020	2014	sustained	n/a	goldensyrian	m	58	111	hamster		clindamycin+challenge	cumulativemortality	t	t	87	vpi10463	100000	cfu	spores	25	125	25	mg/kg	qd	5	vancomycin	0.4	acute							antibiotic	vancomycin	no	therapeutic	all	adult,olderadult	phase2	0.306667
https://pubmed.ncbi.nlm.nih.gov/24277020	2014	sustained	n/a	goldensyrian	m	58	111	hamster		clindamycin+challenge	cumulativemortality	t	t	87	vpi10463	100000	cfu	spores	25	125	25	mg/kg	qd	5	vancomycin	0.4	sustained							antibiotic	vancomycin	no	therapeutic	all	adult,olderadult	phase2	0.306667
https://pubmed.ncbi.nlm.nih.gov/24277020	2014	sustained	n/a	goldensyrian	m	58	111	hamster		clindamycin+challenge	cumulativemortality	t	t	87	vpi10463	100000	cfu	spores	3	15	3	mg/kg	qd	5	vancomycin	0.6	acute	500	5000	125	mg	qid	10	antibiotic	vancomycin	yes	therapeutic	all	adult,olderadult	phase2	0.893939
https://pubmed.ncbi.nlm.nih.gov/24277020	2014	sustained	n/a	goldensyrian	m	58	111	hamster		clindamycin+challenge	cumulativemortality	t	t	87	vpi10463	100000	cfu	spores	3	15	3	mg/kg	qd	5	vancomycin	0.6	sustained	500	5000	125	mg	qid	10	antibiotic	vancomycin	yes	therapeutic	all	adult,olderadult	phase2	0.644068
https://pubmed.ncbi.nlm.nih.gov/24277020	2014	sustained	n/a	goldensyrian	m	58	111	hamster		clindamycin+challenge	cumulativemortality	t	t	87	vpi10463	100000	cfu	spores	3	15	3	mg/kg	qd	5	vancomycin	0.6	sustained	125		125	mg	qd		antibiotic	vancomycin	no	prophylactic	all	olderadult	phase4	1
https://pubmed.ncbi.nlm.nih.gov/24277020	2014	sustained	n/a	goldensyrian	m	58	111	hamster		clindamycin+challenge	cumulativemortality	t	t	87	vpi10463	100000	cfu	spores	3	15	3	mg/kg	qd	5	vancomycin	0.6	acute	500	5000	125	mg	qid	10	antibiotic	vancomycin	no	therapeutic	all	adult,olderadult	phase3	0.853821
https://pubmed.ncbi.nlm.nih.gov/24277020	2014	sustained	n/a	goldensyrian	m	58	111	hamster		clindamycin+challenge	cumulativemortality	t	t	87	vpi10463	100000	cfu	spores	3	15	3	mg/kg	qd	5	vancomycin	0.6	sustained	500	5000	125	mg	qid	10	antibiotic	vancomycin	no	therapeutic	all	adult,olderadult	phase3	0.61794
https://pubmed.ncbi.nlm.nih.gov/24277020	2014	sustained	n/a	goldensyrian	m	58	111	hamster		clindamycin+challenge	cumulativemortality	t	t	87	vpi10463	100000	cfu	spores	3	15	3	mg/kg	qd	5	vancomycin	0.6	acute	500	5000	125	mg	qid	10	antibiotic	vancomycin	no	therapeutic	all	adult,olderadult	phase3	0.849057
https://pubmed.ncbi.nlm.nih.gov/24277020	2014	sustained	n/a	goldensyrian	m	58	111	hamster		clindamycin+challenge	cumulativemortality	t	t	87	vpi10463	100000	cfu	spores	3	15	3	mg/kg	qd	5	vancomycin	0.6	sustained	500	5000	125	mg	qid	10	antibiotic	vancomycin	no	therapeutic	all	adult,olderadult	phase3	0.622642
https://pubmed.ncbi.nlm.nih.gov/24277020	2014	sustained	n/a	goldensyrian	m	58	111	hamster		clindamycin+challenge	cumulativemortality	t	t	87	vpi10463	100000	cfu	spores	3	15	3	mg/kg	qd	5	vancomycin	0.6	acute	500	5000	125	mg	qid	10	antibiotic	vancomycin	no	therapeutic	all	adult,olderadult	phase4	0.821229
https://pubmed.ncbi.nlm.nih.gov/24277020	2014	sustained	n/a	goldensyrian	m	58	111	hamster		clindamycin+challenge	cumulativemortality	t	t	87	vpi10463	100000	cfu	spores	3	15	3	mg/kg	qd	5	vancomycin	0.6	sustained	500	5000	125	mg	qid	10	antibiotic	vancomycin	no	therapeutic	all	adult,olderadult	phase4	0.592179
https://pubmed.ncbi.nlm.nih.gov/24277020	2014	sustained	n/a	goldensyrian	m	58	111	hamster		clindamycin+challenge	cumulativemortality	t	t	87	vpi10463	100000	cfu	spores	3	15	3	mg/kg	qd	5	vancomycin	0.6	acute	500	5000	125	mg	qid	10	antibiotic	vancomycin	no	therapeutic	all	adult,olderadult	phase3	0.835714
https://pubmed.ncbi.nlm.nih.gov/24277020	2014	sustained	n/a	goldensyrian	m	58	111	hamster		clindamycin+challenge	cumulativemortality	t	t	87	vpi10463	100000	cfu	spores	3	15	3	mg/kg	qd	5	vancomycin	0.6	sustained	500	5000	125	mg	qid	10	antibiotic	vancomycin	no	therapeutic	all	adult,olderadult	phase3	0.610714
https://pubmed.ncbi.nlm.nih.gov/24277020	2014	sustained	n/a	goldensyrian	m	58	111	hamster		clindamycin+challenge	cumulativemortality	t	t	87	vpi10463	100000	cfu	spores	3	15	3	mg/kg	qd	5	vancomycin	0.6	acute	500	5000	125	mg	qid	10	antibiotic	vancomycin	no	therapeutic	all	adult,olderadult	phase3	0.818493
https://pubmed.ncbi.nlm.nih.gov/24277020	2014	sustained	n/a	goldensyrian	m	58	111	hamster		clindamycin+challenge	cumulativemortality	t	t	87	vpi10463	100000	cfu	spores	3	15	3	mg/kg	qd	5	vancomycin	0.6	sustained	500	5000	125	mg	qid	10	antibiotic	vancomycin	no	therapeutic	all	adult,olderadult	phase3	0.589041
https://pubmed.ncbi.nlm.nih.gov/24277020	2014	sustained	n/a	goldensyrian	m	58	111	hamster		clindamycin+challenge	cumulativemortality	t	t	87	vpi10463	100000	cfu	spores	3	15	3	mg/kg	qd	5	vancomycin	0.6	acute	500	5000	125	mg	qid	10	antibiotic	vancomycin	no	therapeutic	all	adult,olderadult	phase3	0.87963
https://pubmed.ncbi.nlm.nih.gov/24277020	2014	sustained	n/a	goldensyrian	m	58	111	hamster		clindamycin+challenge	cumulativemortality	t	t	87	vpi10463	100000	cfu	spores	3	15	3	mg/kg	qd	5	vancomycin	0.6	sustained	500	5000	125	mg	qid	10	antibiotic	vancomycin	no	therapeutic	all	adult,olderadult	phase3	0.657407
https://pubmed.ncbi.nlm.nih.gov/24277020	2014	sustained	n/a	goldensyrian	m	58	111	hamster		clindamycin+challenge	cumulativemortality	t	t	87	vpi10463	100000	cfu	spores	3	15	3	mg/kg	qd	5	vancomycin	0.6	acute	500	5000	125	mg	qid	10	antibiotic	vancomycin	no	therapeutic	all	adult,olderadult	phase3	0.1875
https://pubmed.ncbi.nlm.nih.gov/24277020	2014	sustained	n/a	goldensyrian	m	58	111	hamster		clindamycin+challenge	cumulativemortality	t	t	87	vpi10463	100000	cfu	spores	3	15	3	mg/kg	qd	5	vancomycin	0.6	sustained	500	5000	125	mg	qid	10	antibiotic	vancomycin	no	therapeutic	all	adult,olderadult	phase3	0.3125
https://pubmed.ncbi.nlm.nih.gov/24277020	2014	sustained	n/a	goldensyrian	m	58	111	hamster		clindamycin+challenge	cumulativemortality	t	t	87	vpi10463	100000	cfu	spores	3	15	3	mg/kg	qd	5	vancomycin	0.6	acute	500	5000	125	mg	qid	10	antibiotic	vancomycin	yes	therapeutic	all	adult,olderadult	phase2	0.863636
https://pubmed.ncbi.nlm.nih.gov/24277020	2014	sustained	n/a	goldensyrian	m	58	111	hamster		clindamycin+challenge	cumulativemortality	t	t	87	vpi10463	100000	cfu	spores	3	15	3	mg/kg	qd	5	vancomycin	0.6	sustained	500	5000	125	mg	qid	10	antibiotic	vancomycin	yes	therapeutic	all	adult,olderadult	phase2	0.545455
https://pubmed.ncbi.nlm.nih.gov/24277020	2014	sustained	n/a	goldensyrian	m	58	111	hamster		clindamycin+challenge	cumulativemortality	t	t	87	vpi10463	100000	cfu	spores	3	15	3	mg/kg	qd	5	vancomycin	0.6	acute	500	5000	125	mg	qid	10	antibiotic	vancomycin	no	therapeutic	all	child	phase3	0.704545
https://pubmed.ncbi.nlm.nih.gov/24277020	2014	sustained	n/a	goldensyrian	m	58	111	hamster		clindamycin+challenge	cumulativemortality	t	t	87	vpi10463	100000	cfu	spores	3	15	3	mg/kg	qd	5	vancomycin	0.6	sustained	500	5000	125	mg	qid	10	antibiotic	vancomycin	no	therapeutic	all	child	phase3	0.741935
https://pubmed.ncbi.nlm.nih.gov/24277020	2014	sustained	n/a	goldensyrian	m	58	111	hamster		clindamycin+challenge	cumulativemortality	t	t	87	vpi10463	100000	cfu	spores	3	15	3	mg/kg	qd	5	vancomycin	0.6	acute	500	5000	125	mg	qid	10	antibiotic	vancomycin	no	therapeutic	all	child,adult,olderadult	phase3	0.863281
https://pubmed.ncbi.nlm.nih.gov/24277020	2014	sustained	n/a	goldensyrian	m	58	111	hamster		clindamycin+challenge	cumulativemortality	t	t	87	vpi10463	100000	cfu	spores	3	15	3	mg/kg	qd	5	vancomycin	0.6	sustained	500	5000	125	mg	qid	10	antibiotic	vancomycin	no	therapeutic	all	child,adult,olderadult	phase3	0.779279
https://pubmed.ncbi.nlm.nih.gov/24277020	2014	sustained	n/a	goldensyrian	m	58	111	hamster		clindamycin+challenge	cumulativemortality	t	t	87	vpi10463	100000	cfu	spores	3	15	3	mg/kg	qd	5	vancomycin	0.6	acute	500	5000	125	mg	qid	10	antibiotic	vancomycin	no	therapeutic	all	child,adult,olderadult	phase3	0.856678
https://pubmed.ncbi.nlm.nih.gov/24277020	2014	sustained	n/a	goldensyrian	m	58	111	hamster		clindamycin+challenge	cumulativemortality	t	t	87	vpi10463	100000	cfu	spores	3	15	3	mg/kg	qd	5	vancomycin	0.6	sustained	500	5000	125	mg	qid	10	antibiotic	vancomycin	no	therapeutic	all	child,adult,olderadult	phase3	0.745247
https://pubmed.ncbi.nlm.nih.gov/24277020	2014	sustained	n/a	goldensyrian	m	58	111	hamster		clindamycin+challenge	cumulativemortality	t	t	87	vpi10463	100000	cfu	spores	3	15	3	mg/kg	qd	5	vancomycin	0.6	acute	500	5000	125	mg	qid	10	antibiotic	vancomycin	no	therapeutic	all	adult,olderadult	phase3	0.634783
https://pubmed.ncbi.nlm.nih.gov/24277020	2014	sustained	n/a	goldensyrian	m	58	111	hamster		clindamycin+challenge	cumulativemortality	t	t	87	vpi10463	100000	cfu	spores	3	15	3	mg/kg	qd	5	vancomycin	0.6	sustained	500	5000	125	mg	qid	10	antibiotic	vancomycin	no	therapeutic	all	adult,olderadult	phase3	0.863014
https://pubmed.ncbi.nlm.nih.gov/24277020	2014	sustained	n/a	goldensyrian	m	58	111	hamster		clindamycin+challenge	cumulativemortality	t	t	87	vpi10463	100000	cfu	spores	3	15	3	mg/kg	qd	5	vancomycin	0.6	acute	500	5000	125	mg	qid	10	antibiotic	vancomycin	no	therapeutic	all	adult,olderadult	phase3	0.808
https://pubmed.ncbi.nlm.nih.gov/24277020	2014	sustained	n/a	goldensyrian	m	58	111	hamster		clindamycin+challenge	cumulativemortality	t	t	87	vpi10463	100000	cfu	spores	3	15	3	mg/kg	qd	5	vancomycin	0.6	sustained	500	5000	125	mg	qid	10	antibiotic	vancomycin	no	therapeutic	all	adult,olderadult	phase3	0.823529
https://pubmed.ncbi.nlm.nih.gov/24277020	2014	sustained	n/a	goldensyrian	m	58	111	hamster		clindamycin+challenge	cumulativemortality	t	t	87	vpi10463	100000	cfu	spores	3	15	3	mg/kg	qd	5	vancomycin	0.6	acute	500	5000	125	mg	qid	10	antibiotic	vancomycin	no	therapeutic	all	adult,olderadult	phase3	0.80597
https://pubmed.ncbi.nlm.nih.gov/24277020	2014	sustained	n/a	goldensyrian	m	58	111	hamster		clindamycin+challenge	cumulativemortality	t	t	87	vpi10463	100000	cfu	spores	3	15	3	mg/kg	qd	5	vancomycin	0.6	sustained	500	5000	125	mg	qid	10	antibiotic	vancomycin	no	therapeutic	all	adult,olderadult	phase3	0.757009
https://pubmed.ncbi.nlm.nih.gov/24277020	2014	sustained	n/a	goldensyrian	m	58	111	hamster		clindamycin+challenge	cumulativemortality	t	t	87	vpi10463	100000	cfu	spores	3	15	3	mg/kg	qd	5	vancomycin	0.6	acute	500	5000	125	mg	qid	10	antibiotic	vancomycin	no	therapeutic	all	adult,olderadult	phase2	0.69697
https://pubmed.ncbi.nlm.nih.gov/24277020	2014	sustained	n/a	goldensyrian	m	58	111	hamster		clindamycin+challenge	cumulativemortality	t	t	87	vpi10463	100000	cfu	spores	3	15	3	mg/kg	qd	5	vancomycin	0.6	sustained	500	5000	125	mg	qid	10	antibiotic	vancomycin	no	therapeutic	all	adult,olderadult	phase2	0.608696
https://pubmed.ncbi.nlm.nih.gov/24277020	2014	sustained	n/a	goldensyrian	m	58	111	hamster		clindamycin+challenge	cumulativemortality	t	t	87	vpi10463	100000	cfu	spores	3	15	3	mg/kg	qd	5	vancomycin	0.6	acute	500	5000	125	mg	qid	10	antibiotic	vancomycin	no	therapeutic	all	adult,olderadult	phase4	0.666667
https://pubmed.ncbi.nlm.nih.gov/24277020	2014	sustained	n/a	goldensyrian	m	58	111	hamster		clindamycin+challenge	cumulativemortality	t	t	87	vpi10463	100000	cfu	spores	3	15	3	mg/kg	qd	5	vancomycin	0.6	acute	500	5000	125	mg	qid	10	antibiotic	vancomycin	no	therapeutic	all	adult,olderadult	phase4	1
https://pubmed.ncbi.nlm.nih.gov/24277020	2014	sustained	n/a	goldensyrian	m	58	111	hamster		clindamycin+challenge	cumulativemortality	t	t	87	vpi10463	100000	cfu	spores	3	15	3	mg/kg	qd	5	vancomycin	0.6	sustained							control	vancomycin	no	therapeutic	all	adult,olderadult	phase3	0.740741
https://pubmed.ncbi.nlm.nih.gov/24277020	2014	sustained	n/a	goldensyrian	m	58	111	hamster		clindamycin+challenge	cumulativemortality	t	t	87	vpi10463	100000	cfu	spores	3	15	3	mg/kg	qd	5	vancomycin	0.6	sustained							antibiotic	vancomycin	no	therapeutic	all	adult,olderadult	phase3	0.721519
https://pubmed.ncbi.nlm.nih.gov/24277020	2014	sustained	n/a	goldensyrian	m	58	111	hamster		clindamycin+challenge	cumulativemortality	t	t	87	vpi10463	100000	cfu	spores	3	15	3	mg/kg	qd	5	vancomycin	0.6	sustained							antibiotic	vancomycin	no	therapeutic	all	adult,olderadult	phase2	0.263158
https://pubmed.ncbi.nlm.nih.gov/24277020	2014	sustained	n/a	goldensyrian	m	58	111	hamster		clindamycin+challenge	cumulativemortality	t	t	87	vpi10463	100000	cfu	spores	3	15	3	mg/kg	qd	5	vancomycin	0.6	acute							antibiotic	vancomycin	no	therapeutic	all	adult,olderadult	phase2	0.306667
https://pubmed.ncbi.nlm.nih.gov/24277020	2014	sustained	n/a	goldensyrian	m	58	111	hamster		clindamycin+challenge	cumulativemortality	t	t	87	vpi10463	100000	cfu	spores	3	15	3	mg/kg	qd	5	vancomycin	0.6	sustained							antibiotic	vancomycin	no	therapeutic	all	adult,olderadult	phase2	0.306667
https://pubmed.ncbi.nlm.nih.gov/24277020	2014	sustained	n/a	goldensyrian	m	58	111	hamster		clindamycin+challenge	cumulativemortality	t	t	87	vpi10463	100000	cfu	spores	30	150	30	mg/kg	qd	5	vancomycin	0.8	acute	500	5000	125	mg	qid	10	antibiotic	vancomycin	yes	therapeutic	all	adult,olderadult	phase2	0.893939
https://pubmed.ncbi.nlm.nih.gov/24277020	2014	sustained	n/a	goldensyrian	m	58	111	hamster		clindamycin+challenge	cumulativemortality	t	t	87	vpi10463	100000	cfu	spores	30	150	30	mg/kg	qd	5	vancomycin	0.8	sustained	500	5000	125	mg	qid	10	antibiotic	vancomycin	yes	therapeutic	all	adult,olderadult	phase2	0.644068
https://pubmed.ncbi.nlm.nih.gov/24277020	2014	sustained	n/a	goldensyrian	m	58	111	hamster		clindamycin+challenge	cumulativemortality	t	t	87	vpi10463	100000	cfu	spores	30	150	30	mg/kg	qd	5	vancomycin	0.8	sustained	125		125	mg	qd		antibiotic	vancomycin	no	prophylactic	all	olderadult	phase4	1
https://pubmed.ncbi.nlm.nih.gov/24277020	2014	sustained	n/a	goldensyrian	m	58	111	hamster		clindamycin+challenge	cumulativemortality	t	t	87	vpi10463	100000	cfu	spores	30	150	30	mg/kg	qd	5	vancomycin	0.8	acute	500	5000	125	mg	qid	10	antibiotic	vancomycin	no	therapeutic	all	adult,olderadult	phase3	0.853821
https://pubmed.ncbi.nlm.nih.gov/24277020	2014	sustained	n/a	goldensyrian	m	58	111	hamster		clindamycin+challenge	cumulativemortality	t	t	87	vpi10463	100000	cfu	spores	30	150	30	mg/kg	qd	5	vancomycin	0.8	sustained	500	5000	125	mg	qid	10	antibiotic	vancomycin	no	therapeutic	all	adult,olderadult	phase3	0.61794
https://pubmed.ncbi.nlm.nih.gov/24277020	2014	sustained	n/a	goldensyrian	m	58	111	hamster		clindamycin+challenge	cumulativemortality	t	t	87	vpi10463	100000	cfu	spores	30	150	30	mg/kg	qd	5	vancomycin	0.8	acute	500	5000	125	mg	qid	10	antibiotic	vancomycin	no	therapeutic	all	adult,olderadult	phase3	0.849057
https://pubmed.ncbi.nlm.nih.gov/24277020	2014	sustained	n/a	goldensyrian	m	58	111	hamster		clindamycin+challenge	cumulativemortality	t	t	87	vpi10463	100000	cfu	spores	30	150	30	mg/kg	qd	5	vancomycin	0.8	sustained	500	5000	125	mg	qid	10	antibiotic	vancomycin	no	therapeutic	all	adult,olderadult	phase3	0.622642
https://pubmed.ncbi.nlm.nih.gov/24277020	2014	sustained	n/a	goldensyrian	m	58	111	hamster		clindamycin+challenge	cumulativemortality	t	t	87	vpi10463	100000	cfu	spores	30	150	30	mg/kg	qd	5	vancomycin	0.8	acute	500	5000	125	mg	qid	10	antibiotic	vancomycin	no	therapeutic	all	adult,olderadult	phase4	0.821229
https://pubmed.ncbi.nlm.nih.gov/24277020	2014	sustained	n/a	goldensyrian	m	58	111	hamster		clindamycin+challenge	cumulativemortality	t	t	87	vpi10463	100000	cfu	spores	30	150	30	mg/kg	qd	5	vancomycin	0.8	sustained	500	5000	125	mg	qid	10	antibiotic	vancomycin	no	therapeutic	all	adult,olderadult	phase4	0.592179
https://pubmed.ncbi.nlm.nih.gov/24277020	2014	sustained	n/a	goldensyrian	m	58	111	hamster		clindamycin+challenge	cumulativemortality	t	t	87	vpi10463	100000	cfu	spores	30	150	30	mg/kg	qd	5	vancomycin	0.8	acute	500	5000	125	mg	qid	10	antibiotic	vancomycin	no	therapeutic	all	adult,olderadult	phase3	0.835714
https://pubmed.ncbi.nlm.nih.gov/24277020	2014	sustained	n/a	goldensyrian	m	58	111	hamster		clindamycin+challenge	cumulativemortality	t	t	87	vpi10463	100000	cfu	spores	30	150	30	mg/kg	qd	5	vancomycin	0.8	sustained	500	5000	125	mg	qid	10	antibiotic	vancomycin	no	therapeutic	all	adult,olderadult	phase3	0.610714
https://pubmed.ncbi.nlm.nih.gov/24277020	2014	sustained	n/a	goldensyrian	m	58	111	hamster		clindamycin+challenge	cumulativemortality	t	t	87	vpi10463	100000	cfu	spores	30	150	30	mg/kg	qd	5	vancomycin	0.8	acute	500	5000	125	mg	qid	10	antibiotic	vancomycin	no	therapeutic	all	adult,olderadult	phase3	0.818493
https://pubmed.ncbi.nlm.nih.gov/24277020	2014	sustained	n/a	goldensyrian	m	58	111	hamster		clindamycin+challenge	cumulativemortality	t	t	87	vpi10463	100000	cfu	spores	30	150	30	mg/kg	qd	5	vancomycin	0.8	sustained	500	5000	125	mg	qid	10	antibiotic	vancomycin	no	therapeutic	all	adult,olderadult	phase3	0.589041
https://pubmed.ncbi.nlm.nih.gov/24277020	2014	sustained	n/a	goldensyrian	m	58	111	hamster		clindamycin+challenge	cumulativemortality	t	t	87	vpi10463	100000	cfu	spores	30	150	30	mg/kg	qd	5	vancomycin	0.8	acute	500	5000	125	mg	qid	10	antibiotic	vancomycin	no	therapeutic	all	adult,olderadult	phase3	0.87963
https://pubmed.ncbi.nlm.nih.gov/24277020	2014	sustained	n/a	goldensyrian	m	58	111	hamster		clindamycin+challenge	cumulativemortality	t	t	87	vpi10463	100000	cfu	spores	30	150	30	mg/kg	qd	5	vancomycin	0.8	sustained	500	5000	125	mg	qid	10	antibiotic	vancomycin	no	therapeutic	all	adult,olderadult	phase3	0.657407
https://pubmed.ncbi.nlm.nih.gov/24277020	2014	sustained	n/a	goldensyrian	m	58	111	hamster		clindamycin+challenge	cumulativemortality	t	t	87	vpi10463	100000	cfu	spores	30	150	30	mg/kg	qd	5	vancomycin	0.8	acute	500	5000	125	mg	qid	10	antibiotic	vancomycin	no	therapeutic	all	adult,olderadult	phase3	0.1875
https://pubmed.ncbi.nlm.nih.gov/24277020	2014	sustained	n/a	goldensyrian	m	58	111	hamster		clindamycin+challenge	cumulativemortality	t	t	87	vpi10463	100000	cfu	spores	30	150	30	mg/kg	qd	5	vancomycin	0.8	sustained	500	5000	125	mg	qid	10	antibiotic	vancomycin	no	therapeutic	all	adult,olderadult	phase3	0.3125
https://pubmed.ncbi.nlm.nih.gov/24277020	2014	sustained	n/a	goldensyrian	m	58	111	hamster		clindamycin+challenge	cumulativemortality	t	t	87	vpi10463	100000	cfu	spores	30	150	30	mg/kg	qd	5	vancomycin	0.8	acute	500	5000	125	mg	qid	10	antibiotic	vancomycin	yes	therapeutic	all	adult,olderadult	phase2	0.863636
https://pubmed.ncbi.nlm.nih.gov/24277020	2014	sustained	n/a	goldensyrian	m	58	111	hamster		clindamycin+challenge	cumulativemortality	t	t	87	vpi10463	100000	cfu	spores	30	150	30	mg/kg	qd	5	vancomycin	0.8	sustained	500	5000	125	mg	qid	10	antibiotic	vancomycin	yes	therapeutic	all	adult,olderadult	phase2	0.545455
https://pubmed.ncbi.nlm.nih.gov/24277020	2014	sustained	n/a	goldensyrian	m	58	111	hamster		clindamycin+challenge	cumulativemortality	t	t	87	vpi10463	100000	cfu	spores	30	150	30	mg/kg	qd	5	vancomycin	0.8	acute	500	5000	125	mg	qid	10	antibiotic	vancomycin	no	therapeutic	all	child	phase3	0.704545
https://pubmed.ncbi.nlm.nih.gov/24277020	2014	sustained	n/a	goldensyrian	m	58	111	hamster		clindamycin+challenge	cumulativemortality	t	t	87	vpi10463	100000	cfu	spores	30	150	30	mg/kg	qd	5	vancomycin	0.8	sustained	500	5000	125	mg	qid	10	antibiotic	vancomycin	no	therapeutic	all	child	phase3	0.741935
https://pubmed.ncbi.nlm.nih.gov/24277020	2014	sustained	n/a	goldensyrian	m	58	111	hamster		clindamycin+challenge	cumulativemortality	t	t	87	vpi10463	100000	cfu	spores	30	150	30	mg/kg	qd	5	vancomycin	0.8	acute	500	5000	125	mg	qid	10	antibiotic	vancomycin	no	therapeutic	all	child,adult,olderadult	phase3	0.863281
https://pubmed.ncbi.nlm.nih.gov/24277020	2014	sustained	n/a	goldensyrian	m	58	111	hamster		clindamycin+challenge	cumulativemortality	t	t	87	vpi10463	100000	cfu	spores	30	150	30	mg/kg	qd	5	vancomycin	0.8	sustained	500	5000	125	mg	qid	10	antibiotic	vancomycin	no	therapeutic	all	child,adult,olderadult	phase3	0.779279
https://pubmed.ncbi.nlm.nih.gov/24277020	2014	sustained	n/a	goldensyrian	m	58	111	hamster		clindamycin+challenge	cumulativemortality	t	t	87	vpi10463	100000	cfu	spores	30	150	30	mg/kg	qd	5	vancomycin	0.8	acute	500	5000	125	mg	qid	10	antibiotic	vancomycin	no	therapeutic	all	child,adult,olderadult	phase3	0.856678
https://pubmed.ncbi.nlm.nih.gov/24277020	2014	sustained	n/a	goldensyrian	m	58	111	hamster		clindamycin+challenge	cumulativemortality	t	t	87	vpi10463	100000	cfu	spores	30	150	30	mg/kg	qd	5	vancomycin	0.8	sustained	500	5000	125	mg	qid	10	antibiotic	vancomycin	no	therapeutic	all	child,adult,olderadult	phase3	0.745247
https://pubmed.ncbi.nlm.nih.gov/24277020	2014	sustained	n/a	goldensyrian	m	58	111	hamster		clindamycin+challenge	cumulativemortality	t	t	87	vpi10463	100000	cfu	spores	30	150	30	mg/kg	qd	5	vancomycin	0.8	acute	500	5000	125	mg	qid	10	antibiotic	vancomycin	no	therapeutic	all	adult,olderadult	phase3	0.634783
https://pubmed.ncbi.nlm.nih.gov/24277020	2014	sustained	n/a	goldensyrian	m	58	111	hamster		clindamycin+challenge	cumulativemortality	t	t	87	vpi10463	100000	cfu	spores	30	150	30	mg/kg	qd	5	vancomycin	0.8	sustained	500	5000	125	mg	qid	10	antibiotic	vancomycin	no	therapeutic	all	adult,olderadult	phase3	0.863014
https://pubmed.ncbi.nlm.nih.gov/24277020	2014	sustained	n/a	goldensyrian	m	58	111	hamster		clindamycin+challenge	cumulativemortality	t	t	87	vpi10463	100000	cfu	spores	30	150	30	mg/kg	qd	5	vancomycin	0.8	acute	500	5000	125	mg	qid	10	antibiotic	vancomycin	no	therapeutic	all	adult,olderadult	phase3	0.808
https://pubmed.ncbi.nlm.nih.gov/24277020	2014	sustained	n/a	goldensyrian	m	58	111	hamster		clindamycin+challenge	cumulativemortality	t	t	87	vpi10463	100000	cfu	spores	30	150	30	mg/kg	qd	5	vancomycin	0.8	sustained	500	5000	125	mg	qid	10	antibiotic	vancomycin	no	therapeutic	all	adult,olderadult	phase3	0.823529
https://pubmed.ncbi.nlm.nih.gov/24277020	2014	sustained	n/a	goldensyrian	m	58	111	hamster		clindamycin+challenge	cumulativemortality	t	t	87	vpi10463	100000	cfu	spores	30	150	30	mg/kg	qd	5	vancomycin	0.8	acute	500	5000	125	mg	qid	10	antibiotic	vancomycin	no	therapeutic	all	adult,olderadult	phase3	0.80597
https://pubmed.ncbi.nlm.nih.gov/24277020	2014	sustained	n/a	goldensyrian	m	58	111	hamster		clindamycin+challenge	cumulativemortality	t	t	87	vpi10463	100000	cfu	spores	30	150	30	mg/kg	qd	5	vancomycin	0.8	sustained	500	5000	125	mg	qid	10	antibiotic	vancomycin	no	therapeutic	all	adult,olderadult	phase3	0.757009
https://pubmed.ncbi.nlm.nih.gov/24277020	2014	sustained	n/a	goldensyrian	m	58	111	hamster		clindamycin+challenge	cumulativemortality	t	t	87	vpi10463	100000	cfu	spores	30	150	30	mg/kg	qd	5	vancomycin	0.8	acute	500	5000	125	mg	qid	10	antibiotic	vancomycin	no	therapeutic	all	adult,olderadult	phase2	0.69697
https://pubmed.ncbi.nlm.nih.gov/24277020	2014	sustained	n/a	goldensyrian	m	58	111	hamster		clindamycin+challenge	cumulativemortality	t	t	87	vpi10463	100000	cfu	spores	30	150	30	mg/kg	qd	5	vancomycin	0.8	sustained	500	5000	125	mg	qid	10	antibiotic	vancomycin	no	therapeutic	all	adult,olderadult	phase2	0.608696
https://pubmed.ncbi.nlm.nih.gov/24277020	2014	sustained	n/a	goldensyrian	m	58	111	hamster		clindamycin+challenge	cumulativemortality	t	t	87	vpi10463	100000	cfu	spores	30	150	30	mg/kg	qd	5	vancomycin	0.8	acute	500	5000	125	mg	qid	10	antibiotic	vancomycin	no	therapeutic	all	adult,olderadult	phase4	0.666667
https://pubmed.ncbi.nlm.nih.gov/24277020	2014	sustained	n/a	goldensyrian	m	58	111	hamster		clindamycin+challenge	cumulativemortality	t	t	87	vpi10463	100000	cfu	spores	30	150	30	mg/kg	qd	5	vancomycin	0.8	acute	500	5000	125	mg	qid	10	antibiotic	vancomycin	no	therapeutic	all	adult,olderadult	phase4	1
https://pubmed.ncbi.nlm.nih.gov/24277020	2014	sustained	n/a	goldensyrian	m	58	111	hamster		clindamycin+challenge	cumulativemortality	t	t	87	vpi10463	100000	cfu	spores	30	150	30	mg/kg	qd	5	vancomycin	0.8	sustained							control	vancomycin	no	therapeutic	all	adult,olderadult	phase3	0.740741
https://pubmed.ncbi.nlm.nih.gov/24277020	2014	sustained	n/a	goldensyrian	m	58	111	hamster		clindamycin+challenge	cumulativemortality	t	t	87	vpi10463	100000	cfu	spores	30	150	30	mg/kg	qd	5	vancomycin	0.8	sustained							antibiotic	vancomycin	no	therapeutic	all	adult,olderadult	phase3	0.721519
https://pubmed.ncbi.nlm.nih.gov/24277020	2014	sustained	n/a	goldensyrian	m	58	111	hamster		clindamycin+challenge	cumulativemortality	t	t	87	vpi10463	100000	cfu	spores	30	150	30	mg/kg	qd	5	vancomycin	0.8	sustained							antibiotic	vancomycin	no	therapeutic	all	adult,olderadult	phase2	0.263158
https://pubmed.ncbi.nlm.nih.gov/24277020	2014	sustained	n/a	goldensyrian	m	58	111	hamster		clindamycin+challenge	cumulativemortality	t	t	87	vpi10463	100000	cfu	spores	30	150	30	mg/kg	qd	5	vancomycin	0.8	acute							antibiotic	vancomycin	no	therapeutic	all	adult,olderadult	phase2	0.306667
https://pubmed.ncbi.nlm.nih.gov/24277020	2014	sustained	n/a	goldensyrian	m	58	111	hamster		clindamycin+challenge	cumulativemortality	t	t	87	vpi10463	100000	cfu	spores	30	150	30	mg/kg	qd	5	vancomycin	0.8	sustained							antibiotic	vancomycin	no	therapeutic	all	adult,olderadult	phase2	0.306667
https://pubmed.ncbi.nlm.nih.gov/24277020	2014	sustained	n/a	goldensyrian	m	58	111	hamster		clindamycin+challenge	cumulativemortality	t	t	87	vpi10463	100000	cfu	spores	300	1500	300	mg/kg	qd	5	vancomycin	0.8	acute	500	5000	125	mg	qid	10	antibiotic	vancomycin	yes	therapeutic	all	adult,olderadult	phase2	0.893939
https://pubmed.ncbi.nlm.nih.gov/24277020	2014	sustained	n/a	goldensyrian	m	58	111	hamster		clindamycin+challenge	cumulativemortality	t	t	87	vpi10463	100000	cfu	spores	300	1500	300	mg/kg	qd	5	vancomycin	0.8	sustained	500	5000	125	mg	qid	10	antibiotic	vancomycin	yes	therapeutic	all	adult,olderadult	phase2	0.644068
https://pubmed.ncbi.nlm.nih.gov/24277020	2014	sustained	n/a	goldensyrian	m	58	111	hamster		clindamycin+challenge	cumulativemortality	t	t	87	vpi10463	100000	cfu	spores	300	1500	300	mg/kg	qd	5	vancomycin	0.8	sustained	125		125	mg	qd		antibiotic	vancomycin	no	prophylactic	all	olderadult	phase4	1
https://pubmed.ncbi.nlm.nih.gov/24277020	2014	sustained	n/a	goldensyrian	m	58	111	hamster		clindamycin+challenge	cumulativemortality	t	t	87	vpi10463	100000	cfu	spores	300	1500	300	mg/kg	qd	5	vancomycin	0.8	acute	500	5000	125	mg	qid	10	antibiotic	vancomycin	no	therapeutic	all	adult,olderadult	phase3	0.853821
https://pubmed.ncbi.nlm.nih.gov/24277020	2014	sustained	n/a	goldensyrian	m	58	111	hamster		clindamycin+challenge	cumulativemortality	t	t	87	vpi10463	100000	cfu	spores	300	1500	300	mg/kg	qd	5	vancomycin	0.8	sustained	500	5000	125	mg	qid	10	antibiotic	vancomycin	no	therapeutic	all	adult,olderadult	phase3	0.61794
https://pubmed.ncbi.nlm.nih.gov/24277020	2014	sustained	n/a	goldensyrian	m	58	111	hamster		clindamycin+challenge	cumulativemortality	t	t	87	vpi10463	100000	cfu	spores	300	1500	300	mg/kg	qd	5	vancomycin	0.8	acute	500	5000	125	mg	qid	10	antibiotic	vancomycin	no	therapeutic	all	adult,olderadult	phase3	0.849057
https://pubmed.ncbi.nlm.nih.gov/24277020	2014	sustained	n/a	goldensyrian	m	58	111	hamster		clindamycin+challenge	cumulativemortality	t	t	87	vpi10463	100000	cfu	spores	300	1500	300	mg/kg	qd	5	vancomycin	0.8	sustained	500	5000	125	mg	qid	10	antibiotic	vancomycin	no	therapeutic	all	adult,olderadult	phase3	0.622642
https://pubmed.ncbi.nlm.nih.gov/24277020	2014	sustained	n/a	goldensyrian	m	58	111	hamster		clindamycin+challenge	cumulativemortality	t	t	87	vpi10463	100000	cfu	spores	300	1500	300	mg/kg	qd	5	vancomycin	0.8	acute	500	5000	125	mg	qid	10	antibiotic	vancomycin	no	therapeutic	all	adult,olderadult	phase4	0.821229
https://pubmed.ncbi.nlm.nih.gov/24277020	2014	sustained	n/a	goldensyrian	m	58	111	hamster		clindamycin+challenge	cumulativemortality	t	t	87	vpi10463	100000	cfu	spores	300	1500	300	mg/kg	qd	5	vancomycin	0.8	sustained	500	5000	125	mg	qid	10	antibiotic	vancomycin	no	therapeutic	all	adult,olderadult	phase4	0.592179
https://pubmed.ncbi.nlm.nih.gov/24277020	2014	sustained	n/a	goldensyrian	m	58	111	hamster		clindamycin+challenge	cumulativemortality	t	t	87	vpi10463	100000	cfu	spores	300	1500	300	mg/kg	qd	5	vancomycin	0.8	acute	500	5000	125	mg	qid	10	antibiotic	vancomycin	no	therapeutic	all	adult,olderadult	phase3	0.835714
https://pubmed.ncbi.nlm.nih.gov/24277020	2014	sustained	n/a	goldensyrian	m	58	111	hamster		clindamycin+challenge	cumulativemortality	t	t	87	vpi10463	100000	cfu	spores	300	1500	300	mg/kg	qd	5	vancomycin	0.8	sustained	500	5000	125	mg	qid	10	antibiotic	vancomycin	no	therapeutic	all	adult,olderadult	phase3	0.610714
https://pubmed.ncbi.nlm.nih.gov/24277020	2014	sustained	n/a	goldensyrian	m	58	111	hamster		clindamycin+challenge	cumulativemortality	t	t	87	vpi10463	100000	cfu	spores	300	1500	300	mg/kg	qd	5	vancomycin	0.8	acute	500	5000	125	mg	qid	10	antibiotic	vancomycin	no	therapeutic	all	adult,olderadult	phase3	0.818493
https://pubmed.ncbi.nlm.nih.gov/24277020	2014	sustained	n/a	goldensyrian	m	58	111	hamster		clindamycin+challenge	cumulativemortality	t	t	87	vpi10463	100000	cfu	spores	300	1500	300	mg/kg	qd	5	vancomycin	0.8	sustained	500	5000	125	mg	qid	10	antibiotic	vancomycin	no	therapeutic	all	adult,olderadult	phase3	0.589041
https://pubmed.ncbi.nlm.nih.gov/24277020	2014	sustained	n/a	goldensyrian	m	58	111	hamster		clindamycin+challenge	cumulativemortality	t	t	87	vpi10463	100000	cfu	spores	300	1500	300	mg/kg	qd	5	vancomycin	0.8	acute	500	5000	125	mg	qid	10	antibiotic	vancomycin	no	therapeutic	all	adult,olderadult	phase3	0.87963
https://pubmed.ncbi.nlm.nih.gov/24277020	2014	sustained	n/a	goldensyrian	m	58	111	hamster		clindamycin+challenge	cumulativemortality	t	t	87	vpi10463	100000	cfu	spores	300	1500	300	mg/kg	qd	5	vancomycin	0.8	sustained	500	5000	125	mg	qid	10	antibiotic	vancomycin	no	therapeutic	all	adult,olderadult	phase3	0.657407
https://pubmed.ncbi.nlm.nih.gov/24277020	2014	sustained	n/a	goldensyrian	m	58	111	hamster		clindamycin+challenge	cumulativemortality	t	t	87	vpi10463	100000	cfu	spores	300	1500	300	mg/kg	qd	5	vancomycin	0.8	acute	500	5000	125	mg	qid	10	antibiotic	vancomycin	no	therapeutic	all	adult,olderadult	phase3	0.1875
https://pubmed.ncbi.nlm.nih.gov/24277020	2014	sustained	n/a	goldensyrian	m	58	111	hamster		clindamycin+challenge	cumulativemortality	t	t	87	vpi10463	100000	cfu	spores	300	1500	300	mg/kg	qd	5	vancomycin	0.8	sustained	500	5000	125	mg	qid	10	antibiotic	vancomycin	no	therapeutic	all	adult,olderadult	phase3	0.3125
https://pubmed.ncbi.nlm.nih.gov/24277020	2014	sustained	n/a	goldensyrian	m	58	111	hamster		clindamycin+challenge	cumulativemortality	t	t	87	vpi10463	100000	cfu	spores	300	1500	300	mg/kg	qd	5	vancomycin	0.8	acute	500	5000	125	mg	qid	10	antibiotic	vancomycin	yes	therapeutic	all	adult,olderadult	phase2	0.863636
https://pubmed.ncbi.nlm.nih.gov/24277020	2014	sustained	n/a	goldensyrian	m	58	111	hamster		clindamycin+challenge	cumulativemortality	t	t	87	vpi10463	100000	cfu	spores	300	1500	300	mg/kg	qd	5	vancomycin	0.8	sustained	500	5000	125	mg	qid	10	antibiotic	vancomycin	yes	therapeutic	all	adult,olderadult	phase2	0.545455
https://pubmed.ncbi.nlm.nih.gov/24277020	2014	sustained	n/a	goldensyrian	m	58	111	hamster		clindamycin+challenge	cumulativemortality	t	t	87	vpi10463	100000	cfu	spores	300	1500	300	mg/kg	qd	5	vancomycin	0.8	acute	500	5000	125	mg	qid	10	antibiotic	vancomycin	no	therapeutic	all	child	phase3	0.704545
https://pubmed.ncbi.nlm.nih.gov/24277020	2014	sustained	n/a	goldensyrian	m	58	111	hamster		clindamycin+challenge	cumulativemortality	t	t	87	vpi10463	100000	cfu	spores	300	1500	300	mg/kg	qd	5	vancomycin	0.8	sustained	500	5000	125	mg	qid	10	antibiotic	vancomycin	no	therapeutic	all	child	phase3	0.741935
https://pubmed.ncbi.nlm.nih.gov/24277020	2014	sustained	n/a	goldensyrian	m	58	111	hamster		clindamycin+challenge	cumulativemortality	t	t	87	vpi10463	100000	cfu	spores	300	1500	300	mg/kg	qd	5	vancomycin	0.8	acute	500	5000	125	mg	qid	10	antibiotic	vancomycin	no	therapeutic	all	child,adult,olderadult	phase3	0.863281
https://pubmed.ncbi.nlm.nih.gov/24277020	2014	sustained	n/a	goldensyrian	m	58	111	hamster		clindamycin+challenge	cumulativemortality	t	t	87	vpi10463	100000	cfu	spores	300	1500	300	mg/kg	qd	5	vancomycin	0.8	sustained	500	5000	125	mg	qid	10	antibiotic	vancomycin	no	therapeutic	all	child,adult,olderadult	phase3	0.779279
https://pubmed.ncbi.nlm.nih.gov/24277020	2014	sustained	n/a	goldensyrian	m	58	111	hamster		clindamycin+challenge	cumulativemortality	t	t	87	vpi10463	100000	cfu	spores	300	1500	300	mg/kg	qd	5	vancomycin	0.8	acute	500	5000	125	mg	qid	10	antibiotic	vancomycin	no	therapeutic	all	child,adult,olderadult	phase3	0.856678
https://pubmed.ncbi.nlm.nih.gov/24277020	2014	sustained	n/a	goldensyrian	m	58	111	hamster		clindamycin+challenge	cumulativemortality	t	t	87	vpi10463	100000	cfu	spores	300	1500	300	mg/kg	qd	5	vancomycin	0.8	sustained	500	5000	125	mg	qid	10	antibiotic	vancomycin	no	therapeutic	all	child,adult,olderadult	phase3	0.745247
https://pubmed.ncbi.nlm.nih.gov/24277020	2014	sustained	n/a	goldensyrian	m	58	111	hamster		clindamycin+challenge	cumulativemortality	t	t	87	vpi10463	100000	cfu	spores	300	1500	300	mg/kg	qd	5	vancomycin	0.8	acute	500	5000	125	mg	qid	10	antibiotic	vancomycin	no	therapeutic	all	adult,olderadult	phase3	0.634783
https://pubmed.ncbi.nlm.nih.gov/24277020	2014	sustained	n/a	goldensyrian	m	58	111	hamster		clindamycin+challenge	cumulativemortality	t	t	87	vpi10463	100000	cfu	spores	300	1500	300	mg/kg	qd	5	vancomycin	0.8	sustained	500	5000	125	mg	qid	10	antibiotic	vancomycin	no	therapeutic	all	adult,olderadult	phase3	0.863014
https://pubmed.ncbi.nlm.nih.gov/24277020	2014	sustained	n/a	goldensyrian	m	58	111	hamster		clindamycin+challenge	cumulativemortality	t	t	87	vpi10463	100000	cfu	spores	300	1500	300	mg/kg	qd	5	vancomycin	0.8	acute	500	5000	125	mg	qid	10	antibiotic	vancomycin	no	therapeutic	all	adult,olderadult	phase3	0.808
https://pubmed.ncbi.nlm.nih.gov/24277020	2014	sustained	n/a	goldensyrian	m	58	111	hamster		clindamycin+challenge	cumulativemortality	t	t	87	vpi10463	100000	cfu	spores	300	1500	300	mg/kg	qd	5	vancomycin	0.8	sustained	500	5000	125	mg	qid	10	antibiotic	vancomycin	no	therapeutic	all	adult,olderadult	phase3	0.823529
https://pubmed.ncbi.nlm.nih.gov/24277020	2014	sustained	n/a	goldensyrian	m	58	111	hamster		clindamycin+challenge	cumulativemortality	t	t	87	vpi10463	100000	cfu	spores	300	1500	300	mg/kg	qd	5	vancomycin	0.8	acute	500	5000	125	mg	qid	10	antibiotic	vancomycin	no	therapeutic	all	adult,olderadult	phase3	0.80597
https://pubmed.ncbi.nlm.nih.gov/24277020	2014	sustained	n/a	goldensyrian	m	58	111	hamster		clindamycin+challenge	cumulativemortality	t	t	87	vpi10463	100000	cfu	spores	300	1500	300	mg/kg	qd	5	vancomycin	0.8	sustained	500	5000	125	mg	qid	10	antibiotic	vancomycin	no	therapeutic	all	adult,olderadult	phase3	0.757009
https://pubmed.ncbi.nlm.nih.gov/24277020	2014	sustained	n/a	goldensyrian	m	58	111	hamster		clindamycin+challenge	cumulativemortality	t	t	87	vpi10463	100000	cfu	spores	300	1500	300	mg/kg	qd	5	vancomycin	0.8	acute	500	5000	125	mg	qid	10	antibiotic	vancomycin	no	therapeutic	all	adult,olderadult	phase2	0.69697
https://pubmed.ncbi.nlm.nih.gov/24277020	2014	sustained	n/a	goldensyrian	m	58	111	hamster		clindamycin+challenge	cumulativemortality	t	t	87	vpi10463	100000	cfu	spores	300	1500	300	mg/kg	qd	5	vancomycin	0.8	sustained	500	5000	125	mg	qid	10	antibiotic	vancomycin	no	therapeutic	all	adult,olderadult	phase2	0.608696
https://pubmed.ncbi.nlm.nih.gov/24277020	2014	sustained	n/a	goldensyrian	m	58	111	hamster		clindamycin+challenge	cumulativemortality	t	t	87	vpi10463	100000	cfu	spores	300	1500	300	mg/kg	qd	5	vancomycin	0.8	acute	500	5000	125	mg	qid	10	antibiotic	vancomycin	no	therapeutic	all	adult,olderadult	phase4	0.666667
https://pubmed.ncbi.nlm.nih.gov/24277020	2014	sustained	n/a	goldensyrian	m	58	111	hamster		clindamycin+challenge	cumulativemortality	t	t	87	vpi10463	100000	cfu	spores	300	1500	300	mg/kg	qd	5	vancomycin	0.8	acute	500	5000	125	mg	qid	10	antibiotic	vancomycin	no	therapeutic	all	adult,olderadult	phase4	1
https://pubmed.ncbi.nlm.nih.gov/24277020	2014	sustained	n/a	goldensyrian	m	58	111	hamster		clindamycin+challenge	cumulativemortality	t	t	87	vpi10463	100000	cfu	spores	300	1500	300	mg/kg	qd	5	vancomycin	0.8	sustained							control	vancomycin	no	therapeutic	all	adult,olderadult	phase3	0.740741
https://pubmed.ncbi.nlm.nih.gov/24277020	2014	sustained	n/a	goldensyrian	m	58	111	hamster		clindamycin+challenge	cumulativemortality	t	t	87	vpi10463	100000	cfu	spores	300	1500	300	mg/kg	qd	5	vancomycin	0.8	sustained							antibiotic	vancomycin	no	therapeutic	all	adult,olderadult	phase3	0.721519
https://pubmed.ncbi.nlm.nih.gov/24277020	2014	sustained	n/a	goldensyrian	m	58	111	hamster		clindamycin+challenge	cumulativemortality	t	t	87	vpi10463	100000	cfu	spores	300	1500	300	mg/kg	qd	5	vancomycin	0.8	sustained							antibiotic	vancomycin	no	therapeutic	all	adult,olderadult	phase2	0.263158
https://pubmed.ncbi.nlm.nih.gov/24277020	2014	sustained	n/a	goldensyrian	m	58	111	hamster		clindamycin+challenge	cumulativemortality	t	t	87	vpi10463	100000	cfu	spores	300	1500	300	mg/kg	qd	5	vancomycin	0.8	acute							antibiotic	vancomycin	no	therapeutic	all	adult,olderadult	phase2	0.306667
https://pubmed.ncbi.nlm.nih.gov/24277020	2014	sustained	n/a	goldensyrian	m	58	111	hamster		clindamycin+challenge	cumulativemortality	t	t	87	vpi10463	100000	cfu	spores	300	1500	300	mg/kg	qd	5	vancomycin	0.8	sustained							antibiotic	vancomycin	no	therapeutic	all	adult,olderadult	phase2	0.306667
https://pubmed.ncbi.nlm.nih.gov/24277020	2014	sustained	n/a	goldensyrian	m	58	111	hamster		clindamycin+challenge	cumulativemortality	t	t	87	vpi10463	100000	cfu	spores	50	250	50	mg/kg	qd	5	vancomycin	1	acute	500	5000	125	mg	qid	10	antibiotic	vancomycin	yes	therapeutic	all	adult,olderadult	phase2	0.893939
https://pubmed.ncbi.nlm.nih.gov/24277020	2014	sustained	n/a	goldensyrian	m	58	111	hamster		clindamycin+challenge	cumulativemortality	t	t	87	vpi10463	100000	cfu	spores	50	250	50	mg/kg	qd	5	vancomycin	1	sustained	500	5000	125	mg	qid	10	antibiotic	vancomycin	yes	therapeutic	all	adult,olderadult	phase2	0.644068
https://pubmed.ncbi.nlm.nih.gov/24277020	2014	sustained	n/a	goldensyrian	m	58	111	hamster		clindamycin+challenge	cumulativemortality	t	t	87	vpi10463	100000	cfu	spores	50	250	50	mg/kg	qd	5	vancomycin	1	sustained	125		125	mg	qd		antibiotic	vancomycin	no	prophylactic	all	olderadult	phase4	1
https://pubmed.ncbi.nlm.nih.gov/24277020	2014	sustained	n/a	goldensyrian	m	58	111	hamster		clindamycin+challenge	cumulativemortality	t	t	87	vpi10463	100000	cfu	spores	50	250	50	mg/kg	qd	5	vancomycin	1	acute	500	5000	125	mg	qid	10	antibiotic	vancomycin	no	therapeutic	all	adult,olderadult	phase3	0.853821
https://pubmed.ncbi.nlm.nih.gov/24277020	2014	sustained	n/a	goldensyrian	m	58	111	hamster		clindamycin+challenge	cumulativemortality	t	t	87	vpi10463	100000	cfu	spores	50	250	50	mg/kg	qd	5	vancomycin	1	sustained	500	5000	125	mg	qid	10	antibiotic	vancomycin	no	therapeutic	all	adult,olderadult	phase3	0.61794
https://pubmed.ncbi.nlm.nih.gov/24277020	2014	sustained	n/a	goldensyrian	m	58	111	hamster		clindamycin+challenge	cumulativemortality	t	t	87	vpi10463	100000	cfu	spores	50	250	50	mg/kg	qd	5	vancomycin	1	acute	500	5000	125	mg	qid	10	antibiotic	vancomycin	no	therapeutic	all	adult,olderadult	phase3	0.849057
https://pubmed.ncbi.nlm.nih.gov/24277020	2014	sustained	n/a	goldensyrian	m	58	111	hamster		clindamycin+challenge	cumulativemortality	t	t	87	vpi10463	100000	cfu	spores	50	250	50	mg/kg	qd	5	vancomycin	1	sustained	500	5000	125	mg	qid	10	antibiotic	vancomycin	no	therapeutic	all	adult,olderadult	phase3	0.622642
https://pubmed.ncbi.nlm.nih.gov/24277020	2014	sustained	n/a	goldensyrian	m	58	111	hamster		clindamycin+challenge	cumulativemortality	t	t	87	vpi10463	100000	cfu	spores	50	250	50	mg/kg	qd	5	vancomycin	1	acute	500	5000	125	mg	qid	10	antibiotic	vancomycin	no	therapeutic	all	adult,olderadult	phase4	0.821229
https://pubmed.ncbi.nlm.nih.gov/24277020	2014	sustained	n/a	goldensyrian	m	58	111	hamster		clindamycin+challenge	cumulativemortality	t	t	87	vpi10463	100000	cfu	spores	50	250	50	mg/kg	qd	5	vancomycin	1	sustained	500	5000	125	mg	qid	10	antibiotic	vancomycin	no	therapeutic	all	adult,olderadult	phase4	0.592179
https://pubmed.ncbi.nlm.nih.gov/24277020	2014	sustained	n/a	goldensyrian	m	58	111	hamster		clindamycin+challenge	cumulativemortality	t	t	87	vpi10463	100000	cfu	spores	50	250	50	mg/kg	qd	5	vancomycin	1	acute	500	5000	125	mg	qid	10	antibiotic	vancomycin	no	therapeutic	all	adult,olderadult	phase3	0.835714
https://pubmed.ncbi.nlm.nih.gov/24277020	2014	sustained	n/a	goldensyrian	m	58	111	hamster		clindamycin+challenge	cumulativemortality	t	t	87	vpi10463	100000	cfu	spores	50	250	50	mg/kg	qd	5	vancomycin	1	sustained	500	5000	125	mg	qid	10	antibiotic	vancomycin	no	therapeutic	all	adult,olderadult	phase3	0.610714
https://pubmed.ncbi.nlm.nih.gov/24277020	2014	sustained	n/a	goldensyrian	m	58	111	hamster		clindamycin+challenge	cumulativemortality	t	t	87	vpi10463	100000	cfu	spores	50	250	50	mg/kg	qd	5	vancomycin	1	acute	500	5000	125	mg	qid	10	antibiotic	vancomycin	no	therapeutic	all	adult,olderadult	phase3	0.818493
https://pubmed.ncbi.nlm.nih.gov/24277020	2014	sustained	n/a	goldensyrian	m	58	111	hamster		clindamycin+challenge	cumulativemortality	t	t	87	vpi10463	100000	cfu	spores	50	250	50	mg/kg	qd	5	vancomycin	1	sustained	500	5000	125	mg	qid	10	antibiotic	vancomycin	no	therapeutic	all	adult,olderadult	phase3	0.589041
https://pubmed.ncbi.nlm.nih.gov/24277020	2014	sustained	n/a	goldensyrian	m	58	111	hamster		clindamycin+challenge	cumulativemortality	t	t	87	vpi10463	100000	cfu	spores	50	250	50	mg/kg	qd	5	vancomycin	1	acute	500	5000	125	mg	qid	10	antibiotic	vancomycin	no	therapeutic	all	adult,olderadult	phase3	0.87963
https://pubmed.ncbi.nlm.nih.gov/24277020	2014	sustained	n/a	goldensyrian	m	58	111	hamster		clindamycin+challenge	cumulativemortality	t	t	87	vpi10463	100000	cfu	spores	50	250	50	mg/kg	qd	5	vancomycin	1	sustained	500	5000	125	mg	qid	10	antibiotic	vancomycin	no	therapeutic	all	adult,olderadult	phase3	0.657407
https://pubmed.ncbi.nlm.nih.gov/24277020	2014	sustained	n/a	goldensyrian	m	58	111	hamster		clindamycin+challenge	cumulativemortality	t	t	87	vpi10463	100000	cfu	spores	50	250	50	mg/kg	qd	5	vancomycin	1	acute	500	5000	125	mg	qid	10	antibiotic	vancomycin	no	therapeutic	all	adult,olderadult	phase3	0.1875
https://pubmed.ncbi.nlm.nih.gov/24277020	2014	sustained	n/a	goldensyrian	m	58	111	hamster		clindamycin+challenge	cumulativemortality	t	t	87	vpi10463	100000	cfu	spores	50	250	50	mg/kg	qd	5	vancomycin	1	sustained	500	5000	125	mg	qid	10	antibiotic	vancomycin	no	therapeutic	all	adult,olderadult	phase3	0.3125
https://pubmed.ncbi.nlm.nih.gov/24277020	2014	sustained	n/a	goldensyrian	m	58	111	hamster		clindamycin+challenge	cumulativemortality	t	t	87	vpi10463	100000	cfu	spores	50	250	50	mg/kg	qd	5	vancomycin	1	acute	500	5000	125	mg	qid	10	antibiotic	vancomycin	yes	therapeutic	all	adult,olderadult	phase2	0.863636
https://pubmed.ncbi.nlm.nih.gov/24277020	2014	sustained	n/a	goldensyrian	m	58	111	hamster		clindamycin+challenge	cumulativemortality	t	t	87	vpi10463	100000	cfu	spores	50	250	50	mg/kg	qd	5	vancomycin	1	sustained	500	5000	125	mg	qid	10	antibiotic	vancomycin	yes	therapeutic	all	adult,olderadult	phase2	0.545455
https://pubmed.ncbi.nlm.nih.gov/24277020	2014	sustained	n/a	goldensyrian	m	58	111	hamster		clindamycin+challenge	cumulativemortality	t	t	87	vpi10463	100000	cfu	spores	50	250	50	mg/kg	qd	5	vancomycin	1	acute	500	5000	125	mg	qid	10	antibiotic	vancomycin	no	therapeutic	all	child	phase3	0.704545
https://pubmed.ncbi.nlm.nih.gov/24277020	2014	sustained	n/a	goldensyrian	m	58	111	hamster		clindamycin+challenge	cumulativemortality	t	t	87	vpi10463	100000	cfu	spores	50	250	50	mg/kg	qd	5	vancomycin	1	sustained	500	5000	125	mg	qid	10	antibiotic	vancomycin	no	therapeutic	all	child	phase3	0.741935
https://pubmed.ncbi.nlm.nih.gov/24277020	2014	sustained	n/a	goldensyrian	m	58	111	hamster		clindamycin+challenge	cumulativemortality	t	t	87	vpi10463	100000	cfu	spores	50	250	50	mg/kg	qd	5	vancomycin	1	acute	500	5000	125	mg	qid	10	antibiotic	vancomycin	no	therapeutic	all	child,adult,olderadult	phase3	0.863281
https://pubmed.ncbi.nlm.nih.gov/24277020	2014	sustained	n/a	goldensyrian	m	58	111	hamster		clindamycin+challenge	cumulativemortality	t	t	87	vpi10463	100000	cfu	spores	50	250	50	mg/kg	qd	5	vancomycin	1	sustained	500	5000	125	mg	qid	10	antibiotic	vancomycin	no	therapeutic	all	child,adult,olderadult	phase3	0.779279
https://pubmed.ncbi.nlm.nih.gov/24277020	2014	sustained	n/a	goldensyrian	m	58	111	hamster		clindamycin+challenge	cumulativemortality	t	t	87	vpi10463	100000	cfu	spores	50	250	50	mg/kg	qd	5	vancomycin	1	acute	500	5000	125	mg	qid	10	antibiotic	vancomycin	no	therapeutic	all	child,adult,olderadult	phase3	0.856678
https://pubmed.ncbi.nlm.nih.gov/24277020	2014	sustained	n/a	goldensyrian	m	58	111	hamster		clindamycin+challenge	cumulativemortality	t	t	87	vpi10463	100000	cfu	spores	50	250	50	mg/kg	qd	5	vancomycin	1	sustained	500	5000	125	mg	qid	10	antibiotic	vancomycin	no	therapeutic	all	child,adult,olderadult	phase3	0.745247
https://pubmed.ncbi.nlm.nih.gov/24277020	2014	sustained	n/a	goldensyrian	m	58	111	hamster		clindamycin+challenge	cumulativemortality	t	t	87	vpi10463	100000	cfu	spores	50	250	50	mg/kg	qd	5	vancomycin	1	acute	500	5000	125	mg	qid	10	antibiotic	vancomycin	no	therapeutic	all	adult,olderadult	phase3	0.634783
https://pubmed.ncbi.nlm.nih.gov/24277020	2014	sustained	n/a	goldensyrian	m	58	111	hamster		clindamycin+challenge	cumulativemortality	t	t	87	vpi10463	100000	cfu	spores	50	250	50	mg/kg	qd	5	vancomycin	1	sustained	500	5000	125	mg	qid	10	antibiotic	vancomycin	no	therapeutic	all	adult,olderadult	phase3	0.863014
https://pubmed.ncbi.nlm.nih.gov/24277020	2014	sustained	n/a	goldensyrian	m	58	111	hamster		clindamycin+challenge	cumulativemortality	t	t	87	vpi10463	100000	cfu	spores	50	250	50	mg/kg	qd	5	vancomycin	1	acute	500	5000	125	mg	qid	10	antibiotic	vancomycin	no	therapeutic	all	adult,olderadult	phase3	0.808
https://pubmed.ncbi.nlm.nih.gov/24277020	2014	sustained	n/a	goldensyrian	m	58	111	hamster		clindamycin+challenge	cumulativemortality	t	t	87	vpi10463	100000	cfu	spores	50	250	50	mg/kg	qd	5	vancomycin	1	sustained	500	5000	125	mg	qid	10	antibiotic	vancomycin	no	therapeutic	all	adult,olderadult	phase3	0.823529
https://pubmed.ncbi.nlm.nih.gov/24277020	2014	sustained	n/a	goldensyrian	m	58	111	hamster		clindamycin+challenge	cumulativemortality	t	t	87	vpi10463	100000	cfu	spores	50	250	50	mg/kg	qd	5	vancomycin	1	acute	500	5000	125	mg	qid	10	antibiotic	vancomycin	no	therapeutic	all	adult,olderadult	phase3	0.80597
https://pubmed.ncbi.nlm.nih.gov/24277020	2014	sustained	n/a	goldensyrian	m	58	111	hamster		clindamycin+challenge	cumulativemortality	t	t	87	vpi10463	100000	cfu	spores	50	250	50	mg/kg	qd	5	vancomycin	1	sustained	500	5000	125	mg	qid	10	antibiotic	vancomycin	no	therapeutic	all	adult,olderadult	phase3	0.757009
https://pubmed.ncbi.nlm.nih.gov/24277020	2014	sustained	n/a	goldensyrian	m	58	111	hamster		clindamycin+challenge	cumulativemortality	t	t	87	vpi10463	100000	cfu	spores	50	250	50	mg/kg	qd	5	vancomycin	1	acute	500	5000	125	mg	qid	10	antibiotic	vancomycin	no	therapeutic	all	adult,olderadult	phase2	0.69697
https://pubmed.ncbi.nlm.nih.gov/24277020	2014	sustained	n/a	goldensyrian	m	58	111	hamster		clindamycin+challenge	cumulativemortality	t	t	87	vpi10463	100000	cfu	spores	50	250	50	mg/kg	qd	5	vancomycin	1	sustained	500	5000	125	mg	qid	10	antibiotic	vancomycin	no	therapeutic	all	adult,olderadult	phase2	0.608696
https://pubmed.ncbi.nlm.nih.gov/24277020	2014	sustained	n/a	goldensyrian	m	58	111	hamster		clindamycin+challenge	cumulativemortality	t	t	87	vpi10463	100000	cfu	spores	50	250	50	mg/kg	qd	5	vancomycin	1	acute	500	5000	125	mg	qid	10	antibiotic	vancomycin	no	therapeutic	all	adult,olderadult	phase4	0.666667
https://pubmed.ncbi.nlm.nih.gov/24277020	2014	sustained	n/a	goldensyrian	m	58	111	hamster		clindamycin+challenge	cumulativemortality	t	t	87	vpi10463	100000	cfu	spores	50	250	50	mg/kg	qd	5	vancomycin	1	acute	500	5000	125	mg	qid	10	antibiotic	vancomycin	no	therapeutic	all	adult,olderadult	phase4	1
https://pubmed.ncbi.nlm.nih.gov/24277020	2014	sustained	n/a	goldensyrian	m	58	111	hamster		clindamycin+challenge	cumulativemortality	t	t	87	vpi10463	100000	cfu	spores	50	250	50	mg/kg	qd	5	vancomycin	1	sustained							control	vancomycin	no	therapeutic	all	adult,olderadult	phase3	0.740741
https://pubmed.ncbi.nlm.nih.gov/24277020	2014	sustained	n/a	goldensyrian	m	58	111	hamster		clindamycin+challenge	cumulativemortality	t	t	87	vpi10463	100000	cfu	spores	50	250	50	mg/kg	qd	5	vancomycin	1	sustained							antibiotic	vancomycin	no	therapeutic	all	adult,olderadult	phase3	0.721519
https://pubmed.ncbi.nlm.nih.gov/24277020	2014	sustained	n/a	goldensyrian	m	58	111	hamster		clindamycin+challenge	cumulativemortality	t	t	87	vpi10463	100000	cfu	spores	50	250	50	mg/kg	qd	5	vancomycin	1	sustained							antibiotic	vancomycin	no	therapeutic	all	adult,olderadult	phase2	0.263158
https://pubmed.ncbi.nlm.nih.gov/24277020	2014	sustained	n/a	goldensyrian	m	58	111	hamster		clindamycin+challenge	cumulativemortality	t	t	87	vpi10463	100000	cfu	spores	50	250	50	mg/kg	qd	5	vancomycin	1	acute							antibiotic	vancomycin	no	therapeutic	all	adult,olderadult	phase2	0.306667
https://pubmed.ncbi.nlm.nih.gov/24277020	2014	sustained	n/a	goldensyrian	m	58	111	hamster		clindamycin+challenge	cumulativemortality	t	t	87	vpi10463	100000	cfu	spores	50	250	50	mg/kg	qd	5	vancomycin	1	sustained							antibiotic	vancomycin	no	therapeutic	all	adult,olderadult	phase2	0.306667
https://pubmed.ncbi.nlm.nih.gov/23689716	2013	acute	axenic	n/a	n/a	5		pig		challenge	cumulativemortality	t	t	27	uk6	1000000		spores	40	280	20	mg/kg	bid	7	vancomycin	1	acute	500	5000	125	mg	qid	10	antibiotic	vancomycin	yes	therapeutic	all	adult,olderadult	phase2	0.893939
https://pubmed.ncbi.nlm.nih.gov/23689716	2013	acute	axenic	n/a	n/a	5		pig		challenge	cumulativemortality	t	t	27	uk6	1000000		spores	40	280	20	mg/kg	bid	7	vancomycin	1	sustained	500	5000	125	mg	qid	10	antibiotic	vancomycin	yes	therapeutic	all	adult,olderadult	phase2	0.644068
https://pubmed.ncbi.nlm.nih.gov/23689716	2013	acute	axenic	n/a	n/a	5		pig		challenge	cumulativemortality	t	t	27	uk6	1000000		spores	40	280	20	mg/kg	bid	7	vancomycin	1	sustained	125		125	mg	qd		antibiotic	vancomycin	no	prophylactic	all	olderadult	phase4	1
https://pubmed.ncbi.nlm.nih.gov/23689716	2013	acute	axenic	n/a	n/a	5		pig		challenge	cumulativemortality	t	t	27	uk6	1000000		spores	40	280	20	mg/kg	bid	7	vancomycin	1	acute	500	5000	125	mg	qid	10	antibiotic	vancomycin	no	therapeutic	all	adult,olderadult	phase3	0.853821
https://pubmed.ncbi.nlm.nih.gov/23689716	2013	acute	axenic	n/a	n/a	5		pig		challenge	cumulativemortality	t	t	27	uk6	1000000		spores	40	280	20	mg/kg	bid	7	vancomycin	1	sustained	500	5000	125	mg	qid	10	antibiotic	vancomycin	no	therapeutic	all	adult,olderadult	phase3	0.61794
https://pubmed.ncbi.nlm.nih.gov/23689716	2013	acute	axenic	n/a	n/a	5		pig		challenge	cumulativemortality	t	t	27	uk6	1000000		spores	40	280	20	mg/kg	bid	7	vancomycin	1	acute	500	5000	125	mg	qid	10	antibiotic	vancomycin	no	therapeutic	all	adult,olderadult	phase3	0.849057
https://pubmed.ncbi.nlm.nih.gov/23689716	2013	acute	axenic	n/a	n/a	5		pig		challenge	cumulativemortality	t	t	27	uk6	1000000		spores	40	280	20	mg/kg	bid	7	vancomycin	1	sustained	500	5000	125	mg	qid	10	antibiotic	vancomycin	no	therapeutic	all	adult,olderadult	phase3	0.622642
https://pubmed.ncbi.nlm.nih.gov/23689716	2013	acute	axenic	n/a	n/a	5		pig		challenge	cumulativemortality	t	t	27	uk6	1000000		spores	40	280	20	mg/kg	bid	7	vancomycin	1	acute	500	5000	125	mg	qid	10	antibiotic	vancomycin	no	therapeutic	all	adult,olderadult	phase4	0.821229
https://pubmed.ncbi.nlm.nih.gov/23689716	2013	acute	axenic	n/a	n/a	5		pig		challenge	cumulativemortality	t	t	27	uk6	1000000		spores	40	280	20	mg/kg	bid	7	vancomycin	1	sustained	500	5000	125	mg	qid	10	antibiotic	vancomycin	no	therapeutic	all	adult,olderadult	phase4	0.592179
https://pubmed.ncbi.nlm.nih.gov/23689716	2013	acute	axenic	n/a	n/a	5		pig		challenge	cumulativemortality	t	t	27	uk6	1000000		spores	40	280	20	mg/kg	bid	7	vancomycin	1	acute	500	5000	125	mg	qid	10	antibiotic	vancomycin	no	therapeutic	all	adult,olderadult	phase3	0.835714
https://pubmed.ncbi.nlm.nih.gov/23689716	2013	acute	axenic	n/a	n/a	5		pig		challenge	cumulativemortality	t	t	27	uk6	1000000		spores	40	280	20	mg/kg	bid	7	vancomycin	1	sustained	500	5000	125	mg	qid	10	antibiotic	vancomycin	no	therapeutic	all	adult,olderadult	phase3	0.610714
https://pubmed.ncbi.nlm.nih.gov/23689716	2013	acute	axenic	n/a	n/a	5		pig		challenge	cumulativemortality	t	t	27	uk6	1000000		spores	40	280	20	mg/kg	bid	7	vancomycin	1	acute	500	5000	125	mg	qid	10	antibiotic	vancomycin	no	therapeutic	all	adult,olderadult	phase3	0.818493
https://pubmed.ncbi.nlm.nih.gov/23689716	2013	acute	axenic	n/a	n/a	5		pig		challenge	cumulativemortality	t	t	27	uk6	1000000		spores	40	280	20	mg/kg	bid	7	vancomycin	1	sustained	500	5000	125	mg	qid	10	antibiotic	vancomycin	no	therapeutic	all	adult,olderadult	phase3	0.589041
https://pubmed.ncbi.nlm.nih.gov/23689716	2013	acute	axenic	n/a	n/a	5		pig		challenge	cumulativemortality	t	t	27	uk6	1000000		spores	40	280	20	mg/kg	bid	7	vancomycin	1	acute	500	5000	125	mg	qid	10	antibiotic	vancomycin	no	therapeutic	all	adult,olderadult	phase3	0.87963
https://pubmed.ncbi.nlm.nih.gov/23689716	2013	acute	axenic	n/a	n/a	5		pig		challenge	cumulativemortality	t	t	27	uk6	1000000		spores	40	280	20	mg/kg	bid	7	vancomycin	1	sustained	500	5000	125	mg	qid	10	antibiotic	vancomycin	no	therapeutic	all	adult,olderadult	phase3	0.657407
https://pubmed.ncbi.nlm.nih.gov/23689716	2013	acute	axenic	n/a	n/a	5		pig		challenge	cumulativemortality	t	t	27	uk6	1000000		spores	40	280	20	mg/kg	bid	7	vancomycin	1	acute	500	5000	125	mg	qid	10	antibiotic	vancomycin	no	therapeutic	all	adult,olderadult	phase3	0.1875
https://pubmed.ncbi.nlm.nih.gov/23689716	2013	acute	axenic	n/a	n/a	5		pig		challenge	cumulativemortality	t	t	27	uk6	1000000		spores	40	280	20	mg/kg	bid	7	vancomycin	1	sustained	500	5000	125	mg	qid	10	antibiotic	vancomycin	no	therapeutic	all	adult,olderadult	phase3	0.3125
https://pubmed.ncbi.nlm.nih.gov/23689716	2013	acute	axenic	n/a	n/a	5		pig		challenge	cumulativemortality	t	t	27	uk6	1000000		spores	40	280	20	mg/kg	bid	7	vancomycin	1	acute	500	5000	125	mg	qid	10	antibiotic	vancomycin	yes	therapeutic	all	adult,olderadult	phase2	0.863636
https://pubmed.ncbi.nlm.nih.gov/23689716	2013	acute	axenic	n/a	n/a	5		pig		challenge	cumulativemortality	t	t	27	uk6	1000000		spores	40	280	20	mg/kg	bid	7	vancomycin	1	sustained	500	5000	125	mg	qid	10	antibiotic	vancomycin	yes	therapeutic	all	adult,olderadult	phase2	0.545455
https://pubmed.ncbi.nlm.nih.gov/23689716	2013	acute	axenic	n/a	n/a	5		pig		challenge	cumulativemortality	t	t	27	uk6	1000000		spores	40	280	20	mg/kg	bid	7	vancomycin	1	acute	500	5000	125	mg	qid	10	antibiotic	vancomycin	no	therapeutic	all	child	phase3	0.704545
https://pubmed.ncbi.nlm.nih.gov/23689716	2013	acute	axenic	n/a	n/a	5		pig		challenge	cumulativemortality	t	t	27	uk6	1000000		spores	40	280	20	mg/kg	bid	7	vancomycin	1	sustained	500	5000	125	mg	qid	10	antibiotic	vancomycin	no	therapeutic	all	child	phase3	0.741935
https://pubmed.ncbi.nlm.nih.gov/23689716	2013	acute	axenic	n/a	n/a	5		pig		challenge	cumulativemortality	t	t	27	uk6	1000000		spores	40	280	20	mg/kg	bid	7	vancomycin	1	acute	500	5000	125	mg	qid	10	antibiotic	vancomycin	no	therapeutic	all	child,adult,olderadult	phase3	0.863281
https://pubmed.ncbi.nlm.nih.gov/23689716	2013	acute	axenic	n/a	n/a	5		pig		challenge	cumulativemortality	t	t	27	uk6	1000000		spores	40	280	20	mg/kg	bid	7	vancomycin	1	sustained	500	5000	125	mg	qid	10	antibiotic	vancomycin	no	therapeutic	all	child,adult,olderadult	phase3	0.779279
https://pubmed.ncbi.nlm.nih.gov/23689716	2013	acute	axenic	n/a	n/a	5		pig		challenge	cumulativemortality	t	t	27	uk6	1000000		spores	40	280	20	mg/kg	bid	7	vancomycin	1	acute	500	5000	125	mg	qid	10	antibiotic	vancomycin	no	therapeutic	all	child,adult,olderadult	phase3	0.856678
https://pubmed.ncbi.nlm.nih.gov/23689716	2013	acute	axenic	n/a	n/a	5		pig		challenge	cumulativemortality	t	t	27	uk6	1000000		spores	40	280	20	mg/kg	bid	7	vancomycin	1	sustained	500	5000	125	mg	qid	10	antibiotic	vancomycin	no	therapeutic	all	child,adult,olderadult	phase3	0.745247
https://pubmed.ncbi.nlm.nih.gov/23689716	2013	acute	axenic	n/a	n/a	5		pig		challenge	cumulativemortality	t	t	27	uk6	1000000		spores	40	280	20	mg/kg	bid	7	vancomycin	1	acute	500	5000	125	mg	qid	10	antibiotic	vancomycin	no	therapeutic	all	adult,olderadult	phase3	0.634783
https://pubmed.ncbi.nlm.nih.gov/23689716	2013	acute	axenic	n/a	n/a	5		pig		challenge	cumulativemortality	t	t	27	uk6	1000000		spores	40	280	20	mg/kg	bid	7	vancomycin	1	sustained	500	5000	125	mg	qid	10	antibiotic	vancomycin	no	therapeutic	all	adult,olderadult	phase3	0.863014
https://pubmed.ncbi.nlm.nih.gov/23689716	2013	acute	axenic	n/a	n/a	5		pig		challenge	cumulativemortality	t	t	27	uk6	1000000		spores	40	280	20	mg/kg	bid	7	vancomycin	1	acute	500	5000	125	mg	qid	10	antibiotic	vancomycin	no	therapeutic	all	adult,olderadult	phase3	0.808
https://pubmed.ncbi.nlm.nih.gov/23689716	2013	acute	axenic	n/a	n/a	5		pig		challenge	cumulativemortality	t	t	27	uk6	1000000		spores	40	280	20	mg/kg	bid	7	vancomycin	1	sustained	500	5000	125	mg	qid	10	antibiotic	vancomycin	no	therapeutic	all	adult,olderadult	phase3	0.823529
https://pubmed.ncbi.nlm.nih.gov/23689716	2013	acute	axenic	n/a	n/a	5		pig		challenge	cumulativemortality	t	t	27	uk6	1000000		spores	40	280	20	mg/kg	bid	7	vancomycin	1	acute	500	5000	125	mg	qid	10	antibiotic	vancomycin	no	therapeutic	all	adult,olderadult	phase3	0.80597
https://pubmed.ncbi.nlm.nih.gov/23689716	2013	acute	axenic	n/a	n/a	5		pig		challenge	cumulativemortality	t	t	27	uk6	1000000		spores	40	280	20	mg/kg	bid	7	vancomycin	1	sustained	500	5000	125	mg	qid	10	antibiotic	vancomycin	no	therapeutic	all	adult,olderadult	phase3	0.757009
https://pubmed.ncbi.nlm.nih.gov/23689716	2013	acute	axenic	n/a	n/a	5		pig		challenge	cumulativemortality	t	t	27	uk6	1000000		spores	40	280	20	mg/kg	bid	7	vancomycin	1	acute	500	5000	125	mg	qid	10	antibiotic	vancomycin	no	therapeutic	all	adult,olderadult	phase2	0.69697
https://pubmed.ncbi.nlm.nih.gov/23689716	2013	acute	axenic	n/a	n/a	5		pig		challenge	cumulativemortality	t	t	27	uk6	1000000		spores	40	280	20	mg/kg	bid	7	vancomycin	1	sustained	500	5000	125	mg	qid	10	antibiotic	vancomycin	no	therapeutic	all	adult,olderadult	phase2	0.608696
https://pubmed.ncbi.nlm.nih.gov/23689716	2013	acute	axenic	n/a	n/a	5		pig		challenge	cumulativemortality	t	t	27	uk6	1000000		spores	40	280	20	mg/kg	bid	7	vancomycin	1	acute	500	5000	125	mg	qid	10	antibiotic	vancomycin	no	therapeutic	all	adult,olderadult	phase4	0.666667
https://pubmed.ncbi.nlm.nih.gov/23689716	2013	acute	axenic	n/a	n/a	5		pig		challenge	cumulativemortality	t	t	27	uk6	1000000		spores	40	280	20	mg/kg	bid	7	vancomycin	1	acute	500	5000	125	mg	qid	10	antibiotic	vancomycin	no	therapeutic	all	adult,olderadult	phase4	1
https://pubmed.ncbi.nlm.nih.gov/23689716	2013	acute	axenic	n/a	n/a	5		pig		challenge	cumulativemortality	t	t	27	uk6	1000000		spores	40	280	20	mg/kg	bid	7	vancomycin	1	sustained							control	vancomycin	no	therapeutic	all	adult,olderadult	phase3	0.740741
https://pubmed.ncbi.nlm.nih.gov/23689716	2013	acute	axenic	n/a	n/a	5		pig		challenge	cumulativemortality	t	t	27	uk6	1000000		spores	40	280	20	mg/kg	bid	7	vancomycin	1	sustained							antibiotic	vancomycin	no	therapeutic	all	adult,olderadult	phase3	0.721519
https://pubmed.ncbi.nlm.nih.gov/23689716	2013	acute	axenic	n/a	n/a	5		pig		challenge	cumulativemortality	t	t	27	uk6	1000000		spores	40	280	20	mg/kg	bid	7	vancomycin	1	sustained							antibiotic	vancomycin	no	therapeutic	all	adult,olderadult	phase2	0.263158
https://pubmed.ncbi.nlm.nih.gov/23689716	2013	acute	axenic	n/a	n/a	5		pig		challenge	cumulativemortality	t	t	27	uk6	1000000		spores	40	280	20	mg/kg	bid	7	vancomycin	1	acute							antibiotic	vancomycin	no	therapeutic	all	adult,olderadult	phase2	0.306667
https://pubmed.ncbi.nlm.nih.gov/23689716	2013	acute	axenic	n/a	n/a	5		pig		challenge	cumulativemortality	t	t	27	uk6	1000000		spores	40	280	20	mg/kg	bid	7	vancomycin	1	sustained							antibiotic	vancomycin	no	therapeutic	all	adult,olderadult	phase2	0.306667
https://pubmed.ncbi.nlm.nih.gov/33495229	2021	acute	spf	goldensyrian	m	39		hamster		challenge+clindamycin	survival	t	t	87	vpi10463	1000000	cfu		0.04	0.2	0.04	mg/kg	qd	5	vancomycin	0	acute	500	5000	125	mg	qid	10	antibiotic	vancomycin	yes	therapeutic	all	adult,olderadult	phase2	0.893939
https://pubmed.ncbi.nlm.nih.gov/33495229	2021	acute	spf	goldensyrian	m	39		hamster		challenge+clindamycin	survival	t	t	87	vpi10463	1000000	cfu		0.04	0.2	0.04	mg/kg	qd	5	vancomycin	0	sustained	500	5000	125	mg	qid	10	antibiotic	vancomycin	yes	therapeutic	all	adult,olderadult	phase2	0.644068
https://pubmed.ncbi.nlm.nih.gov/33495229	2021	acute	spf	goldensyrian	m	39		hamster		challenge+clindamycin	survival	t	t	87	vpi10463	1000000	cfu		0.04	0.2	0.04	mg/kg	qd	5	vancomycin	0	sustained	125		125	mg	qd		antibiotic	vancomycin	no	prophylactic	all	olderadult	phase4	1
https://pubmed.ncbi.nlm.nih.gov/33495229	2021	acute	spf	goldensyrian	m	39		hamster		challenge+clindamycin	survival	t	t	87	vpi10463	1000000	cfu		0.04	0.2	0.04	mg/kg	qd	5	vancomycin	0	acute	500	5000	125	mg	qid	10	antibiotic	vancomycin	no	therapeutic	all	adult,olderadult	phase3	0.853821
https://pubmed.ncbi.nlm.nih.gov/33495229	2021	acute	spf	goldensyrian	m	39		hamster		challenge+clindamycin	survival	t	t	87	vpi10463	1000000	cfu		0.04	0.2	0.04	mg/kg	qd	5	vancomycin	0	sustained	500	5000	125	mg	qid	10	antibiotic	vancomycin	no	therapeutic	all	adult,olderadult	phase3	0.61794
https://pubmed.ncbi.nlm.nih.gov/33495229	2021	acute	spf	goldensyrian	m	39		hamster		challenge+clindamycin	survival	t	t	87	vpi10463	1000000	cfu		0.04	0.2	0.04	mg/kg	qd	5	vancomycin	0	acute	500	5000	125	mg	qid	10	antibiotic	vancomycin	no	therapeutic	all	adult,olderadult	phase3	0.849057
https://pubmed.ncbi.nlm.nih.gov/33495229	2021	acute	spf	goldensyrian	m	39		hamster		challenge+clindamycin	survival	t	t	87	vpi10463	1000000	cfu		0.04	0.2	0.04	mg/kg	qd	5	vancomycin	0	sustained	500	5000	125	mg	qid	10	antibiotic	vancomycin	no	therapeutic	all	adult,olderadult	phase3	0.622642
https://pubmed.ncbi.nlm.nih.gov/33495229	2021	acute	spf	goldensyrian	m	39		hamster		challenge+clindamycin	survival	t	t	87	vpi10463	1000000	cfu		0.04	0.2	0.04	mg/kg	qd	5	vancomycin	0	acute	500	5000	125	mg	qid	10	antibiotic	vancomycin	no	therapeutic	all	adult,olderadult	phase4	0.821229
https://pubmed.ncbi.nlm.nih.gov/33495229	2021	acute	spf	goldensyrian	m	39		hamster		challenge+clindamycin	survival	t	t	87	vpi10463	1000000	cfu		0.04	0.2	0.04	mg/kg	qd	5	vancomycin	0	sustained	500	5000	125	mg	qid	10	antibiotic	vancomycin	no	therapeutic	all	adult,olderadult	phase4	0.592179
https://pubmed.ncbi.nlm.nih.gov/33495229	2021	acute	spf	goldensyrian	m	39		hamster		challenge+clindamycin	survival	t	t	87	vpi10463	1000000	cfu		0.04	0.2	0.04	mg/kg	qd	5	vancomycin	0	acute	500	5000	125	mg	qid	10	antibiotic	vancomycin	no	therapeutic	all	adult,olderadult	phase3	0.835714
https://pubmed.ncbi.nlm.nih.gov/33495229	2021	acute	spf	goldensyrian	m	39		hamster		challenge+clindamycin	survival	t	t	87	vpi10463	1000000	cfu		0.04	0.2	0.04	mg/kg	qd	5	vancomycin	0	sustained	500	5000	125	mg	qid	10	antibiotic	vancomycin	no	therapeutic	all	adult,olderadult	phase3	0.610714
https://pubmed.ncbi.nlm.nih.gov/33495229	2021	acute	spf	goldensyrian	m	39		hamster		challenge+clindamycin	survival	t	t	87	vpi10463	1000000	cfu		0.04	0.2	0.04	mg/kg	qd	5	vancomycin	0	acute	500	5000	125	mg	qid	10	antibiotic	vancomycin	no	therapeutic	all	adult,olderadult	phase3	0.818493
https://pubmed.ncbi.nlm.nih.gov/33495229	2021	acute	spf	goldensyrian	m	39		hamster		challenge+clindamycin	survival	t	t	87	vpi10463	1000000	cfu		0.04	0.2	0.04	mg/kg	qd	5	vancomycin	0	sustained	500	5000	125	mg	qid	10	antibiotic	vancomycin	no	therapeutic	all	adult,olderadult	phase3	0.589041
https://pubmed.ncbi.nlm.nih.gov/33495229	2021	acute	spf	goldensyrian	m	39		hamster		challenge+clindamycin	survival	t	t	87	vpi10463	1000000	cfu		0.04	0.2	0.04	mg/kg	qd	5	vancomycin	0	acute	500	5000	125	mg	qid	10	antibiotic	vancomycin	no	therapeutic	all	adult,olderadult	phase3	0.87963
https://pubmed.ncbi.nlm.nih.gov/33495229	2021	acute	spf	goldensyrian	m	39		hamster		challenge+clindamycin	survival	t	t	87	vpi10463	1000000	cfu		0.04	0.2	0.04	mg/kg	qd	5	vancomycin	0	sustained	500	5000	125	mg	qid	10	antibiotic	vancomycin	no	therapeutic	all	adult,olderadult	phase3	0.657407
https://pubmed.ncbi.nlm.nih.gov/33495229	2021	acute	spf	goldensyrian	m	39		hamster		challenge+clindamycin	survival	t	t	87	vpi10463	1000000	cfu		0.04	0.2	0.04	mg/kg	qd	5	vancomycin	0	acute	500	5000	125	mg	qid	10	antibiotic	vancomycin	no	therapeutic	all	adult,olderadult	phase3	0.1875
https://pubmed.ncbi.nlm.nih.gov/33495229	2021	acute	spf	goldensyrian	m	39		hamster		challenge+clindamycin	survival	t	t	87	vpi10463	1000000	cfu		0.04	0.2	0.04	mg/kg	qd	5	vancomycin	0	sustained	500	5000	125	mg	qid	10	antibiotic	vancomycin	no	therapeutic	all	adult,olderadult	phase3	0.3125
https://pubmed.ncbi.nlm.nih.gov/33495229	2021	acute	spf	goldensyrian	m	39		hamster		challenge+clindamycin	survival	t	t	87	vpi10463	1000000	cfu		0.04	0.2	0.04	mg/kg	qd	5	vancomycin	0	acute	500	5000	125	mg	qid	10	antibiotic	vancomycin	yes	therapeutic	all	adult,olderadult	phase2	0.863636
https://pubmed.ncbi.nlm.nih.gov/33495229	2021	acute	spf	goldensyrian	m	39		hamster		challenge+clindamycin	survival	t	t	87	vpi10463	1000000	cfu		0.04	0.2	0.04	mg/kg	qd	5	vancomycin	0	sustained	500	5000	125	mg	qid	10	antibiotic	vancomycin	yes	therapeutic	all	adult,olderadult	phase2	0.545455
https://pubmed.ncbi.nlm.nih.gov/33495229	2021	acute	spf	goldensyrian	m	39		hamster		challenge+clindamycin	survival	t	t	87	vpi10463	1000000	cfu		0.04	0.2	0.04	mg/kg	qd	5	vancomycin	0	acute	500	5000	125	mg	qid	10	antibiotic	vancomycin	no	therapeutic	all	child	phase3	0.704545
https://pubmed.ncbi.nlm.nih.gov/33495229	2021	acute	spf	goldensyrian	m	39		hamster		challenge+clindamycin	survival	t	t	87	vpi10463	1000000	cfu		0.04	0.2	0.04	mg/kg	qd	5	vancomycin	0	sustained	500	5000	125	mg	qid	10	antibiotic	vancomycin	no	therapeutic	all	child	phase3	0.741935
https://pubmed.ncbi.nlm.nih.gov/33495229	2021	acute	spf	goldensyrian	m	39		hamster		challenge+clindamycin	survival	t	t	87	vpi10463	1000000	cfu		0.04	0.2	0.04	mg/kg	qd	5	vancomycin	0	acute	500	5000	125	mg	qid	10	antibiotic	vancomycin	no	therapeutic	all	child,adult,olderadult	phase3	0.863281
https://pubmed.ncbi.nlm.nih.gov/33495229	2021	acute	spf	goldensyrian	m	39		hamster		challenge+clindamycin	survival	t	t	87	vpi10463	1000000	cfu		0.04	0.2	0.04	mg/kg	qd	5	vancomycin	0	sustained	500	5000	125	mg	qid	10	antibiotic	vancomycin	no	therapeutic	all	child,adult,olderadult	phase3	0.779279
https://pubmed.ncbi.nlm.nih.gov/33495229	2021	acute	spf	goldensyrian	m	39		hamster		challenge+clindamycin	survival	t	t	87	vpi10463	1000000	cfu		0.04	0.2	0.04	mg/kg	qd	5	vancomycin	0	acute	500	5000	125	mg	qid	10	antibiotic	vancomycin	no	therapeutic	all	child,adult,olderadult	phase3	0.856678
https://pubmed.ncbi.nlm.nih.gov/33495229	2021	acute	spf	goldensyrian	m	39		hamster		challenge+clindamycin	survival	t	t	87	vpi10463	1000000	cfu		0.04	0.2	0.04	mg/kg	qd	5	vancomycin	0	sustained	500	5000	125	mg	qid	10	antibiotic	vancomycin	no	therapeutic	all	child,adult,olderadult	phase3	0.745247
https://pubmed.ncbi.nlm.nih.gov/33495229	2021	acute	spf	goldensyrian	m	39		hamster		challenge+clindamycin	survival	t	t	87	vpi10463	1000000	cfu		0.04	0.2	0.04	mg/kg	qd	5	vancomycin	0	acute	500	5000	125	mg	qid	10	antibiotic	vancomycin	no	therapeutic	all	adult,olderadult	phase3	0.634783
https://pubmed.ncbi.nlm.nih.gov/33495229	2021	acute	spf	goldensyrian	m	39		hamster		challenge+clindamycin	survival	t	t	87	vpi10463	1000000	cfu		0.04	0.2	0.04	mg/kg	qd	5	vancomycin	0	sustained	500	5000	125	mg	qid	10	antibiotic	vancomycin	no	therapeutic	all	adult,olderadult	phase3	0.863014
https://pubmed.ncbi.nlm.nih.gov/33495229	2021	acute	spf	goldensyrian	m	39		hamster		challenge+clindamycin	survival	t	t	87	vpi10463	1000000	cfu		0.04	0.2	0.04	mg/kg	qd	5	vancomycin	0	acute	500	5000	125	mg	qid	10	antibiotic	vancomycin	no	therapeutic	all	adult,olderadult	phase3	0.808
https://pubmed.ncbi.nlm.nih.gov/33495229	2021	acute	spf	goldensyrian	m	39		hamster		challenge+clindamycin	survival	t	t	87	vpi10463	1000000	cfu		0.04	0.2	0.04	mg/kg	qd	5	vancomycin	0	sustained	500	5000	125	mg	qid	10	antibiotic	vancomycin	no	therapeutic	all	adult,olderadult	phase3	0.823529
https://pubmed.ncbi.nlm.nih.gov/33495229	2021	acute	spf	goldensyrian	m	39		hamster		challenge+clindamycin	survival	t	t	87	vpi10463	1000000	cfu		0.04	0.2	0.04	mg/kg	qd	5	vancomycin	0	acute	500	5000	125	mg	qid	10	antibiotic	vancomycin	no	therapeutic	all	adult,olderadult	phase3	0.80597
https://pubmed.ncbi.nlm.nih.gov/33495229	2021	acute	spf	goldensyrian	m	39		hamster		challenge+clindamycin	survival	t	t	87	vpi10463	1000000	cfu		0.04	0.2	0.04	mg/kg	qd	5	vancomycin	0	sustained	500	5000	125	mg	qid	10	antibiotic	vancomycin	no	therapeutic	all	adult,olderadult	phase3	0.757009
https://pubmed.ncbi.nlm.nih.gov/33495229	2021	acute	spf	goldensyrian	m	39		hamster		challenge+clindamycin	survival	t	t	87	vpi10463	1000000	cfu		0.04	0.2	0.04	mg/kg	qd	5	vancomycin	0	acute	500	5000	125	mg	qid	10	antibiotic	vancomycin	no	therapeutic	all	adult,olderadult	phase2	0.69697
https://pubmed.ncbi.nlm.nih.gov/33495229	2021	acute	spf	goldensyrian	m	39		hamster		challenge+clindamycin	survival	t	t	87	vpi10463	1000000	cfu		0.04	0.2	0.04	mg/kg	qd	5	vancomycin	0	sustained	500	5000	125	mg	qid	10	antibiotic	vancomycin	no	therapeutic	all	adult,olderadult	phase2	0.608696
https://pubmed.ncbi.nlm.nih.gov/33495229	2021	acute	spf	goldensyrian	m	39		hamster		challenge+clindamycin	survival	t	t	87	vpi10463	1000000	cfu		0.04	0.2	0.04	mg/kg	qd	5	vancomycin	0	acute	500	5000	125	mg	qid	10	antibiotic	vancomycin	no	therapeutic	all	adult,olderadult	phase4	0.666667
https://pubmed.ncbi.nlm.nih.gov/33495229	2021	acute	spf	goldensyrian	m	39		hamster		challenge+clindamycin	survival	t	t	87	vpi10463	1000000	cfu		0.04	0.2	0.04	mg/kg	qd	5	vancomycin	0	acute	500	5000	125	mg	qid	10	antibiotic	vancomycin	no	therapeutic	all	adult,olderadult	phase4	1
https://pubmed.ncbi.nlm.nih.gov/33495229	2021	acute	spf	goldensyrian	m	39		hamster		challenge+clindamycin	survival	t	t	87	vpi10463	1000000	cfu		0.04	0.2	0.04	mg/kg	qd	5	vancomycin	0	sustained							control	vancomycin	no	therapeutic	all	adult,olderadult	phase3	0.740741
https://pubmed.ncbi.nlm.nih.gov/33495229	2021	acute	spf	goldensyrian	m	39		hamster		challenge+clindamycin	survival	t	t	87	vpi10463	1000000	cfu		0.04	0.2	0.04	mg/kg	qd	5	vancomycin	0	sustained							antibiotic	vancomycin	no	therapeutic	all	adult,olderadult	phase3	0.721519
https://pubmed.ncbi.nlm.nih.gov/33495229	2021	acute	spf	goldensyrian	m	39		hamster		challenge+clindamycin	survival	t	t	87	vpi10463	1000000	cfu		0.04	0.2	0.04	mg/kg	qd	5	vancomycin	0	sustained							antibiotic	vancomycin	no	therapeutic	all	adult,olderadult	phase2	0.263158
https://pubmed.ncbi.nlm.nih.gov/33495229	2021	acute	spf	goldensyrian	m	39		hamster		challenge+clindamycin	survival	t	t	87	vpi10463	1000000	cfu		0.04	0.2	0.04	mg/kg	qd	5	vancomycin	0	acute							antibiotic	vancomycin	no	therapeutic	all	adult,olderadult	phase2	0.306667
https://pubmed.ncbi.nlm.nih.gov/33495229	2021	acute	spf	goldensyrian	m	39		hamster		challenge+clindamycin	survival	t	t	87	vpi10463	1000000	cfu		0.04	0.2	0.04	mg/kg	qd	5	vancomycin	0	sustained							antibiotic	vancomycin	no	therapeutic	all	adult,olderadult	phase2	0.306667
https://pubmed.ncbi.nlm.nih.gov/33495229	2021	acute	spf	goldensyrian	m	39		hamster		challenge+clindamycin	survival	t	t	87	vpi10463	1000000	cfu		0.2	1	0.2	mg/kg	qd	5	vancomycin	0	acute	500	5000	125	mg	qid	10	antibiotic	vancomycin	yes	therapeutic	all	adult,olderadult	phase2	0.893939
https://pubmed.ncbi.nlm.nih.gov/33495229	2021	acute	spf	goldensyrian	m	39		hamster		challenge+clindamycin	survival	t	t	87	vpi10463	1000000	cfu		0.2	1	0.2	mg/kg	qd	5	vancomycin	0	sustained	500	5000	125	mg	qid	10	antibiotic	vancomycin	yes	therapeutic	all	adult,olderadult	phase2	0.644068
https://pubmed.ncbi.nlm.nih.gov/33495229	2021	acute	spf	goldensyrian	m	39		hamster		challenge+clindamycin	survival	t	t	87	vpi10463	1000000	cfu		0.2	1	0.2	mg/kg	qd	5	vancomycin	0	sustained	125		125	mg	qd		antibiotic	vancomycin	no	prophylactic	all	olderadult	phase4	1
https://pubmed.ncbi.nlm.nih.gov/33495229	2021	acute	spf	goldensyrian	m	39		hamster		challenge+clindamycin	survival	t	t	87	vpi10463	1000000	cfu		0.2	1	0.2	mg/kg	qd	5	vancomycin	0	acute	500	5000	125	mg	qid	10	antibiotic	vancomycin	no	therapeutic	all	adult,olderadult	phase3	0.853821
https://pubmed.ncbi.nlm.nih.gov/33495229	2021	acute	spf	goldensyrian	m	39		hamster		challenge+clindamycin	survival	t	t	87	vpi10463	1000000	cfu		0.2	1	0.2	mg/kg	qd	5	vancomycin	0	sustained	500	5000	125	mg	qid	10	antibiotic	vancomycin	no	therapeutic	all	adult,olderadult	phase3	0.61794
https://pubmed.ncbi.nlm.nih.gov/33495229	2021	acute	spf	goldensyrian	m	39		hamster		challenge+clindamycin	survival	t	t	87	vpi10463	1000000	cfu		0.2	1	0.2	mg/kg	qd	5	vancomycin	0	acute	500	5000	125	mg	qid	10	antibiotic	vancomycin	no	therapeutic	all	adult,olderadult	phase3	0.849057
https://pubmed.ncbi.nlm.nih.gov/33495229	2021	acute	spf	goldensyrian	m	39		hamster		challenge+clindamycin	survival	t	t	87	vpi10463	1000000	cfu		0.2	1	0.2	mg/kg	qd	5	vancomycin	0	sustained	500	5000	125	mg	qid	10	antibiotic	vancomycin	no	therapeutic	all	adult,olderadult	phase3	0.622642
https://pubmed.ncbi.nlm.nih.gov/33495229	2021	acute	spf	goldensyrian	m	39		hamster		challenge+clindamycin	survival	t	t	87	vpi10463	1000000	cfu		0.2	1	0.2	mg/kg	qd	5	vancomycin	0	acute	500	5000	125	mg	qid	10	antibiotic	vancomycin	no	therapeutic	all	adult,olderadult	phase4	0.821229
https://pubmed.ncbi.nlm.nih.gov/33495229	2021	acute	spf	goldensyrian	m	39		hamster		challenge+clindamycin	survival	t	t	87	vpi10463	1000000	cfu		0.2	1	0.2	mg/kg	qd	5	vancomycin	0	sustained	500	5000	125	mg	qid	10	antibiotic	vancomycin	no	therapeutic	all	adult,olderadult	phase4	0.592179
https://pubmed.ncbi.nlm.nih.gov/33495229	2021	acute	spf	goldensyrian	m	39		hamster		challenge+clindamycin	survival	t	t	87	vpi10463	1000000	cfu		0.2	1	0.2	mg/kg	qd	5	vancomycin	0	acute	500	5000	125	mg	qid	10	antibiotic	vancomycin	no	therapeutic	all	adult,olderadult	phase3	0.835714
https://pubmed.ncbi.nlm.nih.gov/33495229	2021	acute	spf	goldensyrian	m	39		hamster		challenge+clindamycin	survival	t	t	87	vpi10463	1000000	cfu		0.2	1	0.2	mg/kg	qd	5	vancomycin	0	sustained	500	5000	125	mg	qid	10	antibiotic	vancomycin	no	therapeutic	all	adult,olderadult	phase3	0.610714
https://pubmed.ncbi.nlm.nih.gov/33495229	2021	acute	spf	goldensyrian	m	39		hamster		challenge+clindamycin	survival	t	t	87	vpi10463	1000000	cfu		0.2	1	0.2	mg/kg	qd	5	vancomycin	0	acute	500	5000	125	mg	qid	10	antibiotic	vancomycin	no	therapeutic	all	adult,olderadult	phase3	0.818493
https://pubmed.ncbi.nlm.nih.gov/33495229	2021	acute	spf	goldensyrian	m	39		hamster		challenge+clindamycin	survival	t	t	87	vpi10463	1000000	cfu		0.2	1	0.2	mg/kg	qd	5	vancomycin	0	sustained	500	5000	125	mg	qid	10	antibiotic	vancomycin	no	therapeutic	all	adult,olderadult	phase3	0.589041
https://pubmed.ncbi.nlm.nih.gov/33495229	2021	acute	spf	goldensyrian	m	39		hamster		challenge+clindamycin	survival	t	t	87	vpi10463	1000000	cfu		0.2	1	0.2	mg/kg	qd	5	vancomycin	0	acute	500	5000	125	mg	qid	10	antibiotic	vancomycin	no	therapeutic	all	adult,olderadult	phase3	0.87963
https://pubmed.ncbi.nlm.nih.gov/33495229	2021	acute	spf	goldensyrian	m	39		hamster		challenge+clindamycin	survival	t	t	87	vpi10463	1000000	cfu		0.2	1	0.2	mg/kg	qd	5	vancomycin	0	sustained	500	5000	125	mg	qid	10	antibiotic	vancomycin	no	therapeutic	all	adult,olderadult	phase3	0.657407
https://pubmed.ncbi.nlm.nih.gov/33495229	2021	acute	spf	goldensyrian	m	39		hamster		challenge+clindamycin	survival	t	t	87	vpi10463	1000000	cfu		0.2	1	0.2	mg/kg	qd	5	vancomycin	0	acute	500	5000	125	mg	qid	10	antibiotic	vancomycin	no	therapeutic	all	adult,olderadult	phase3	0.1875
https://pubmed.ncbi.nlm.nih.gov/33495229	2021	acute	spf	goldensyrian	m	39		hamster		challenge+clindamycin	survival	t	t	87	vpi10463	1000000	cfu		0.2	1	0.2	mg/kg	qd	5	vancomycin	0	sustained	500	5000	125	mg	qid	10	antibiotic	vancomycin	no	therapeutic	all	adult,olderadult	phase3	0.3125
https://pubmed.ncbi.nlm.nih.gov/33495229	2021	acute	spf	goldensyrian	m	39		hamster		challenge+clindamycin	survival	t	t	87	vpi10463	1000000	cfu		0.2	1	0.2	mg/kg	qd	5	vancomycin	0	acute	500	5000	125	mg	qid	10	antibiotic	vancomycin	yes	therapeutic	all	adult,olderadult	phase2	0.863636
https://pubmed.ncbi.nlm.nih.gov/33495229	2021	acute	spf	goldensyrian	m	39		hamster		challenge+clindamycin	survival	t	t	87	vpi10463	1000000	cfu		0.2	1	0.2	mg/kg	qd	5	vancomycin	0	sustained	500	5000	125	mg	qid	10	antibiotic	vancomycin	yes	therapeutic	all	adult,olderadult	phase2	0.545455
https://pubmed.ncbi.nlm.nih.gov/33495229	2021	acute	spf	goldensyrian	m	39		hamster		challenge+clindamycin	survival	t	t	87	vpi10463	1000000	cfu		0.2	1	0.2	mg/kg	qd	5	vancomycin	0	acute	500	5000	125	mg	qid	10	antibiotic	vancomycin	no	therapeutic	all	child	phase3	0.704545
https://pubmed.ncbi.nlm.nih.gov/33495229	2021	acute	spf	goldensyrian	m	39		hamster		challenge+clindamycin	survival	t	t	87	vpi10463	1000000	cfu		0.2	1	0.2	mg/kg	qd	5	vancomycin	0	sustained	500	5000	125	mg	qid	10	antibiotic	vancomycin	no	therapeutic	all	child	phase3	0.741935
https://pubmed.ncbi.nlm.nih.gov/33495229	2021	acute	spf	goldensyrian	m	39		hamster		challenge+clindamycin	survival	t	t	87	vpi10463	1000000	cfu		0.2	1	0.2	mg/kg	qd	5	vancomycin	0	acute	500	5000	125	mg	qid	10	antibiotic	vancomycin	no	therapeutic	all	child,adult,olderadult	phase3	0.863281
https://pubmed.ncbi.nlm.nih.gov/33495229	2021	acute	spf	goldensyrian	m	39		hamster		challenge+clindamycin	survival	t	t	87	vpi10463	1000000	cfu		0.2	1	0.2	mg/kg	qd	5	vancomycin	0	sustained	500	5000	125	mg	qid	10	antibiotic	vancomycin	no	therapeutic	all	child,adult,olderadult	phase3	0.779279
https://pubmed.ncbi.nlm.nih.gov/33495229	2021	acute	spf	goldensyrian	m	39		hamster		challenge+clindamycin	survival	t	t	87	vpi10463	1000000	cfu		0.2	1	0.2	mg/kg	qd	5	vancomycin	0	acute	500	5000	125	mg	qid	10	antibiotic	vancomycin	no	therapeutic	all	child,adult,olderadult	phase3	0.856678
https://pubmed.ncbi.nlm.nih.gov/33495229	2021	acute	spf	goldensyrian	m	39		hamster		challenge+clindamycin	survival	t	t	87	vpi10463	1000000	cfu		0.2	1	0.2	mg/kg	qd	5	vancomycin	0	sustained	500	5000	125	mg	qid	10	antibiotic	vancomycin	no	therapeutic	all	child,adult,olderadult	phase3	0.745247
https://pubmed.ncbi.nlm.nih.gov/33495229	2021	acute	spf	goldensyrian	m	39		hamster		challenge+clindamycin	survival	t	t	87	vpi10463	1000000	cfu		0.2	1	0.2	mg/kg	qd	5	vancomycin	0	acute	500	5000	125	mg	qid	10	antibiotic	vancomycin	no	therapeutic	all	adult,olderadult	phase3	0.634783
https://pubmed.ncbi.nlm.nih.gov/33495229	2021	acute	spf	goldensyrian	m	39		hamster		challenge+clindamycin	survival	t	t	87	vpi10463	1000000	cfu		0.2	1	0.2	mg/kg	qd	5	vancomycin	0	sustained	500	5000	125	mg	qid	10	antibiotic	vancomycin	no	therapeutic	all	adult,olderadult	phase3	0.863014
https://pubmed.ncbi.nlm.nih.gov/33495229	2021	acute	spf	goldensyrian	m	39		hamster		challenge+clindamycin	survival	t	t	87	vpi10463	1000000	cfu		0.2	1	0.2	mg/kg	qd	5	vancomycin	0	acute	500	5000	125	mg	qid	10	antibiotic	vancomycin	no	therapeutic	all	adult,olderadult	phase3	0.808
https://pubmed.ncbi.nlm.nih.gov/33495229	2021	acute	spf	goldensyrian	m	39		hamster		challenge+clindamycin	survival	t	t	87	vpi10463	1000000	cfu		0.2	1	0.2	mg/kg	qd	5	vancomycin	0	sustained	500	5000	125	mg	qid	10	antibiotic	vancomycin	no	therapeutic	all	adult,olderadult	phase3	0.823529
https://pubmed.ncbi.nlm.nih.gov/33495229	2021	acute	spf	goldensyrian	m	39		hamster		challenge+clindamycin	survival	t	t	87	vpi10463	1000000	cfu		0.2	1	0.2	mg/kg	qd	5	vancomycin	0	acute	500	5000	125	mg	qid	10	antibiotic	vancomycin	no	therapeutic	all	adult,olderadult	phase3	0.80597
https://pubmed.ncbi.nlm.nih.gov/33495229	2021	acute	spf	goldensyrian	m	39		hamster		challenge+clindamycin	survival	t	t	87	vpi10463	1000000	cfu		0.2	1	0.2	mg/kg	qd	5	vancomycin	0	sustained	500	5000	125	mg	qid	10	antibiotic	vancomycin	no	therapeutic	all	adult,olderadult	phase3	0.757009
https://pubmed.ncbi.nlm.nih.gov/33495229	2021	acute	spf	goldensyrian	m	39		hamster		challenge+clindamycin	survival	t	t	87	vpi10463	1000000	cfu		0.2	1	0.2	mg/kg	qd	5	vancomycin	0	acute	500	5000	125	mg	qid	10	antibiotic	vancomycin	no	therapeutic	all	adult,olderadult	phase2	0.69697
https://pubmed.ncbi.nlm.nih.gov/33495229	2021	acute	spf	goldensyrian	m	39		hamster		challenge+clindamycin	survival	t	t	87	vpi10463	1000000	cfu		0.2	1	0.2	mg/kg	qd	5	vancomycin	0	sustained	500	5000	125	mg	qid	10	antibiotic	vancomycin	no	therapeutic	all	adult,olderadult	phase2	0.608696
https://pubmed.ncbi.nlm.nih.gov/33495229	2021	acute	spf	goldensyrian	m	39		hamster		challenge+clindamycin	survival	t	t	87	vpi10463	1000000	cfu		0.2	1	0.2	mg/kg	qd	5	vancomycin	0	acute	500	5000	125	mg	qid	10	antibiotic	vancomycin	no	therapeutic	all	adult,olderadult	phase4	0.666667
https://pubmed.ncbi.nlm.nih.gov/33495229	2021	acute	spf	goldensyrian	m	39		hamster		challenge+clindamycin	survival	t	t	87	vpi10463	1000000	cfu		0.2	1	0.2	mg/kg	qd	5	vancomycin	0	acute	500	5000	125	mg	qid	10	antibiotic	vancomycin	no	therapeutic	all	adult,olderadult	phase4	1
https://pubmed.ncbi.nlm.nih.gov/33495229	2021	acute	spf	goldensyrian	m	39		hamster		challenge+clindamycin	survival	t	t	87	vpi10463	1000000	cfu		0.2	1	0.2	mg/kg	qd	5	vancomycin	0	sustained							control	vancomycin	no	therapeutic	all	adult,olderadult	phase3	0.740741
https://pubmed.ncbi.nlm.nih.gov/33495229	2021	acute	spf	goldensyrian	m	39		hamster		challenge+clindamycin	survival	t	t	87	vpi10463	1000000	cfu		0.2	1	0.2	mg/kg	qd	5	vancomycin	0	sustained							antibiotic	vancomycin	no	therapeutic	all	adult,olderadult	phase3	0.721519
https://pubmed.ncbi.nlm.nih.gov/33495229	2021	acute	spf	goldensyrian	m	39		hamster		challenge+clindamycin	survival	t	t	87	vpi10463	1000000	cfu		0.2	1	0.2	mg/kg	qd	5	vancomycin	0	sustained							antibiotic	vancomycin	no	therapeutic	all	adult,olderadult	phase2	0.263158
https://pubmed.ncbi.nlm.nih.gov/33495229	2021	acute	spf	goldensyrian	m	39		hamster		challenge+clindamycin	survival	t	t	87	vpi10463	1000000	cfu		0.2	1	0.2	mg/kg	qd	5	vancomycin	0	acute							antibiotic	vancomycin	no	therapeutic	all	adult,olderadult	phase2	0.306667
https://pubmed.ncbi.nlm.nih.gov/33495229	2021	acute	spf	goldensyrian	m	39		hamster		challenge+clindamycin	survival	t	t	87	vpi10463	1000000	cfu		0.2	1	0.2	mg/kg	qd	5	vancomycin	0	sustained							antibiotic	vancomycin	no	therapeutic	all	adult,olderadult	phase2	0.306667
https://pubmed.ncbi.nlm.nih.gov/33495229	2021	acute	spf	goldensyrian	m	39		hamster		challenge+clindamycin	survival	t	t	87	vpi10463	1000000	cfu		1	5	1	mg/kg	qd	5	vancomycin	0.5	acute	500	5000	125	mg	qid	10	antibiotic	vancomycin	yes	therapeutic	all	adult,olderadult	phase2	0.893939
https://pubmed.ncbi.nlm.nih.gov/33495229	2021	acute	spf	goldensyrian	m	39		hamster		challenge+clindamycin	survival	t	t	87	vpi10463	1000000	cfu		1	5	1	mg/kg	qd	5	vancomycin	0.5	sustained	500	5000	125	mg	qid	10	antibiotic	vancomycin	yes	therapeutic	all	adult,olderadult	phase2	0.644068
https://pubmed.ncbi.nlm.nih.gov/33495229	2021	acute	spf	goldensyrian	m	39		hamster		challenge+clindamycin	survival	t	t	87	vpi10463	1000000	cfu		1	5	1	mg/kg	qd	5	vancomycin	0.5	sustained	125		125	mg	qd		antibiotic	vancomycin	no	prophylactic	all	olderadult	phase4	1
https://pubmed.ncbi.nlm.nih.gov/33495229	2021	acute	spf	goldensyrian	m	39		hamster		challenge+clindamycin	survival	t	t	87	vpi10463	1000000	cfu		1	5	1	mg/kg	qd	5	vancomycin	0.5	acute	500	5000	125	mg	qid	10	antibiotic	vancomycin	no	therapeutic	all	adult,olderadult	phase3	0.853821
https://pubmed.ncbi.nlm.nih.gov/33495229	2021	acute	spf	goldensyrian	m	39		hamster		challenge+clindamycin	survival	t	t	87	vpi10463	1000000	cfu		1	5	1	mg/kg	qd	5	vancomycin	0.5	sustained	500	5000	125	mg	qid	10	antibiotic	vancomycin	no	therapeutic	all	adult,olderadult	phase3	0.61794
https://pubmed.ncbi.nlm.nih.gov/33495229	2021	acute	spf	goldensyrian	m	39		hamster		challenge+clindamycin	survival	t	t	87	vpi10463	1000000	cfu		1	5	1	mg/kg	qd	5	vancomycin	0.5	acute	500	5000	125	mg	qid	10	antibiotic	vancomycin	no	therapeutic	all	adult,olderadult	phase3	0.849057
https://pubmed.ncbi.nlm.nih.gov/33495229	2021	acute	spf	goldensyrian	m	39		hamster		challenge+clindamycin	survival	t	t	87	vpi10463	1000000	cfu		1	5	1	mg/kg	qd	5	vancomycin	0.5	sustained	500	5000	125	mg	qid	10	antibiotic	vancomycin	no	therapeutic	all	adult,olderadult	phase3	0.622642
https://pubmed.ncbi.nlm.nih.gov/33495229	2021	acute	spf	goldensyrian	m	39		hamster		challenge+clindamycin	survival	t	t	87	vpi10463	1000000	cfu		1	5	1	mg/kg	qd	5	vancomycin	0.5	acute	500	5000	125	mg	qid	10	antibiotic	vancomycin	no	therapeutic	all	adult,olderadult	phase4	0.821229
https://pubmed.ncbi.nlm.nih.gov/33495229	2021	acute	spf	goldensyrian	m	39		hamster		challenge+clindamycin	survival	t	t	87	vpi10463	1000000	cfu		1	5	1	mg/kg	qd	5	vancomycin	0.5	sustained	500	5000	125	mg	qid	10	antibiotic	vancomycin	no	therapeutic	all	adult,olderadult	phase4	0.592179
https://pubmed.ncbi.nlm.nih.gov/33495229	2021	acute	spf	goldensyrian	m	39		hamster		challenge+clindamycin	survival	t	t	87	vpi10463	1000000	cfu		1	5	1	mg/kg	qd	5	vancomycin	0.5	acute	500	5000	125	mg	qid	10	antibiotic	vancomycin	no	therapeutic	all	adult,olderadult	phase3	0.835714
https://pubmed.ncbi.nlm.nih.gov/33495229	2021	acute	spf	goldensyrian	m	39		hamster		challenge+clindamycin	survival	t	t	87	vpi10463	1000000	cfu		1	5	1	mg/kg	qd	5	vancomycin	0.5	sustained	500	5000	125	mg	qid	10	antibiotic	vancomycin	no	therapeutic	all	adult,olderadult	phase3	0.610714
https://pubmed.ncbi.nlm.nih.gov/33495229	2021	acute	spf	goldensyrian	m	39		hamster		challenge+clindamycin	survival	t	t	87	vpi10463	1000000	cfu		1	5	1	mg/kg	qd	5	vancomycin	0.5	acute	500	5000	125	mg	qid	10	antibiotic	vancomycin	no	therapeutic	all	adult,olderadult	phase3	0.818493
https://pubmed.ncbi.nlm.nih.gov/33495229	2021	acute	spf	goldensyrian	m	39		hamster		challenge+clindamycin	survival	t	t	87	vpi10463	1000000	cfu		1	5	1	mg/kg	qd	5	vancomycin	0.5	sustained	500	5000	125	mg	qid	10	antibiotic	vancomycin	no	therapeutic	all	adult,olderadult	phase3	0.589041
https://pubmed.ncbi.nlm.nih.gov/33495229	2021	acute	spf	goldensyrian	m	39		hamster		challenge+clindamycin	survival	t	t	87	vpi10463	1000000	cfu		1	5	1	mg/kg	qd	5	vancomycin	0.5	acute	500	5000	125	mg	qid	10	antibiotic	vancomycin	no	therapeutic	all	adult,olderadult	phase3	0.87963
https://pubmed.ncbi.nlm.nih.gov/33495229	2021	acute	spf	goldensyrian	m	39		hamster		challenge+clindamycin	survival	t	t	87	vpi10463	1000000	cfu		1	5	1	mg/kg	qd	5	vancomycin	0.5	sustained	500	5000	125	mg	qid	10	antibiotic	vancomycin	no	therapeutic	all	adult,olderadult	phase3	0.657407
https://pubmed.ncbi.nlm.nih.gov/33495229	2021	acute	spf	goldensyrian	m	39		hamster		challenge+clindamycin	survival	t	t	87	vpi10463	1000000	cfu		1	5	1	mg/kg	qd	5	vancomycin	0.5	acute	500	5000	125	mg	qid	10	antibiotic	vancomycin	no	therapeutic	all	adult,olderadult	phase3	0.1875
https://pubmed.ncbi.nlm.nih.gov/33495229	2021	acute	spf	goldensyrian	m	39		hamster		challenge+clindamycin	survival	t	t	87	vpi10463	1000000	cfu		1	5	1	mg/kg	qd	5	vancomycin	0.5	sustained	500	5000	125	mg	qid	10	antibiotic	vancomycin	no	therapeutic	all	adult,olderadult	phase3	0.3125
https://pubmed.ncbi.nlm.nih.gov/33495229	2021	acute	spf	goldensyrian	m	39		hamster		challenge+clindamycin	survival	t	t	87	vpi10463	1000000	cfu		1	5	1	mg/kg	qd	5	vancomycin	0.5	acute	500	5000	125	mg	qid	10	antibiotic	vancomycin	yes	therapeutic	all	adult,olderadult	phase2	0.863636
https://pubmed.ncbi.nlm.nih.gov/33495229	2021	acute	spf	goldensyrian	m	39		hamster		challenge+clindamycin	survival	t	t	87	vpi10463	1000000	cfu		1	5	1	mg/kg	qd	5	vancomycin	0.5	sustained	500	5000	125	mg	qid	10	antibiotic	vancomycin	yes	therapeutic	all	adult,olderadult	phase2	0.545455
https://pubmed.ncbi.nlm.nih.gov/33495229	2021	acute	spf	goldensyrian	m	39		hamster		challenge+clindamycin	survival	t	t	87	vpi10463	1000000	cfu		1	5	1	mg/kg	qd	5	vancomycin	0.5	acute	500	5000	125	mg	qid	10	antibiotic	vancomycin	no	therapeutic	all	child	phase3	0.704545
https://pubmed.ncbi.nlm.nih.gov/33495229	2021	acute	spf	goldensyrian	m	39		hamster		challenge+clindamycin	survival	t	t	87	vpi10463	1000000	cfu		1	5	1	mg/kg	qd	5	vancomycin	0.5	sustained	500	5000	125	mg	qid	10	antibiotic	vancomycin	no	therapeutic	all	child	phase3	0.741935
https://pubmed.ncbi.nlm.nih.gov/33495229	2021	acute	spf	goldensyrian	m	39		hamster		challenge+clindamycin	survival	t	t	87	vpi10463	1000000	cfu		1	5	1	mg/kg	qd	5	vancomycin	0.5	acute	500	5000	125	mg	qid	10	antibiotic	vancomycin	no	therapeutic	all	child,adult,olderadult	phase3	0.863281
https://pubmed.ncbi.nlm.nih.gov/33495229	2021	acute	spf	goldensyrian	m	39		hamster		challenge+clindamycin	survival	t	t	87	vpi10463	1000000	cfu		1	5	1	mg/kg	qd	5	vancomycin	0.5	sustained	500	5000	125	mg	qid	10	antibiotic	vancomycin	no	therapeutic	all	child,adult,olderadult	phase3	0.779279
https://pubmed.ncbi.nlm.nih.gov/33495229	2021	acute	spf	goldensyrian	m	39		hamster		challenge+clindamycin	survival	t	t	87	vpi10463	1000000	cfu		1	5	1	mg/kg	qd	5	vancomycin	0.5	acute	500	5000	125	mg	qid	10	antibiotic	vancomycin	no	therapeutic	all	child,adult,olderadult	phase3	0.856678
https://pubmed.ncbi.nlm.nih.gov/33495229	2021	acute	spf	goldensyrian	m	39		hamster		challenge+clindamycin	survival	t	t	87	vpi10463	1000000	cfu		1	5	1	mg/kg	qd	5	vancomycin	0.5	sustained	500	5000	125	mg	qid	10	antibiotic	vancomycin	no	therapeutic	all	child,adult,olderadult	phase3	0.745247
https://pubmed.ncbi.nlm.nih.gov/33495229	2021	acute	spf	goldensyrian	m	39		hamster		challenge+clindamycin	survival	t	t	87	vpi10463	1000000	cfu		1	5	1	mg/kg	qd	5	vancomycin	0.5	acute	500	5000	125	mg	qid	10	antibiotic	vancomycin	no	therapeutic	all	adult,olderadult	phase3	0.634783
https://pubmed.ncbi.nlm.nih.gov/33495229	2021	acute	spf	goldensyrian	m	39		hamster		challenge+clindamycin	survival	t	t	87	vpi10463	1000000	cfu		1	5	1	mg/kg	qd	5	vancomycin	0.5	sustained	500	5000	125	mg	qid	10	antibiotic	vancomycin	no	therapeutic	all	adult,olderadult	phase3	0.863014
https://pubmed.ncbi.nlm.nih.gov/33495229	2021	acute	spf	goldensyrian	m	39		hamster		challenge+clindamycin	survival	t	t	87	vpi10463	1000000	cfu		1	5	1	mg/kg	qd	5	vancomycin	0.5	acute	500	5000	125	mg	qid	10	antibiotic	vancomycin	no	therapeutic	all	adult,olderadult	phase3	0.808
https://pubmed.ncbi.nlm.nih.gov/33495229	2021	acute	spf	goldensyrian	m	39		hamster		challenge+clindamycin	survival	t	t	87	vpi10463	1000000	cfu		1	5	1	mg/kg	qd	5	vancomycin	0.5	sustained	500	5000	125	mg	qid	10	antibiotic	vancomycin	no	therapeutic	all	adult,olderadult	phase3	0.823529
https://pubmed.ncbi.nlm.nih.gov/33495229	2021	acute	spf	goldensyrian	m	39		hamster		challenge+clindamycin	survival	t	t	87	vpi10463	1000000	cfu		1	5	1	mg/kg	qd	5	vancomycin	0.5	acute	500	5000	125	mg	qid	10	antibiotic	vancomycin	no	therapeutic	all	adult,olderadult	phase3	0.80597
https://pubmed.ncbi.nlm.nih.gov/33495229	2021	acute	spf	goldensyrian	m	39		hamster		challenge+clindamycin	survival	t	t	87	vpi10463	1000000	cfu		1	5	1	mg/kg	qd	5	vancomycin	0.5	sustained	500	5000	125	mg	qid	10	antibiotic	vancomycin	no	therapeutic	all	adult,olderadult	phase3	0.757009
https://pubmed.ncbi.nlm.nih.gov/33495229	2021	acute	spf	goldensyrian	m	39		hamster		challenge+clindamycin	survival	t	t	87	vpi10463	1000000	cfu		1	5	1	mg/kg	qd	5	vancomycin	0.5	acute	500	5000	125	mg	qid	10	antibiotic	vancomycin	no	therapeutic	all	adult,olderadult	phase2	0.69697
https://pubmed.ncbi.nlm.nih.gov/33495229	2021	acute	spf	goldensyrian	m	39		hamster		challenge+clindamycin	survival	t	t	87	vpi10463	1000000	cfu		1	5	1	mg/kg	qd	5	vancomycin	0.5	sustained	500	5000	125	mg	qid	10	antibiotic	vancomycin	no	therapeutic	all	adult,olderadult	phase2	0.608696
https://pubmed.ncbi.nlm.nih.gov/33495229	2021	acute	spf	goldensyrian	m	39		hamster		challenge+clindamycin	survival	t	t	87	vpi10463	1000000	cfu		1	5	1	mg/kg	qd	5	vancomycin	0.5	acute	500	5000	125	mg	qid	10	antibiotic	vancomycin	no	therapeutic	all	adult,olderadult	phase4	0.666667
https://pubmed.ncbi.nlm.nih.gov/33495229	2021	acute	spf	goldensyrian	m	39		hamster		challenge+clindamycin	survival	t	t	87	vpi10463	1000000	cfu		1	5	1	mg/kg	qd	5	vancomycin	0.5	acute	500	5000	125	mg	qid	10	antibiotic	vancomycin	no	therapeutic	all	adult,olderadult	phase4	1
https://pubmed.ncbi.nlm.nih.gov/33495229	2021	acute	spf	goldensyrian	m	39		hamster		challenge+clindamycin	survival	t	t	87	vpi10463	1000000	cfu		1	5	1	mg/kg	qd	5	vancomycin	0.5	sustained							control	vancomycin	no	therapeutic	all	adult,olderadult	phase3	0.740741
https://pubmed.ncbi.nlm.nih.gov/33495229	2021	acute	spf	goldensyrian	m	39		hamster		challenge+clindamycin	survival	t	t	87	vpi10463	1000000	cfu		1	5	1	mg/kg	qd	5	vancomycin	0.5	sustained							antibiotic	vancomycin	no	therapeutic	all	adult,olderadult	phase3	0.721519
https://pubmed.ncbi.nlm.nih.gov/33495229	2021	acute	spf	goldensyrian	m	39		hamster		challenge+clindamycin	survival	t	t	87	vpi10463	1000000	cfu		1	5	1	mg/kg	qd	5	vancomycin	0.5	sustained							antibiotic	vancomycin	no	therapeutic	all	adult,olderadult	phase2	0.263158
https://pubmed.ncbi.nlm.nih.gov/33495229	2021	acute	spf	goldensyrian	m	39		hamster		challenge+clindamycin	survival	t	t	87	vpi10463	1000000	cfu		1	5	1	mg/kg	qd	5	vancomycin	0.5	acute							antibiotic	vancomycin	no	therapeutic	all	adult,olderadult	phase2	0.306667
https://pubmed.ncbi.nlm.nih.gov/33495229	2021	acute	spf	goldensyrian	m	39		hamster		challenge+clindamycin	survival	t	t	87	vpi10463	1000000	cfu		1	5	1	mg/kg	qd	5	vancomycin	0.5	sustained							antibiotic	vancomycin	no	therapeutic	all	adult,olderadult	phase2	0.306667
https://pubmed.ncbi.nlm.nih.gov/33495229	2021	acute	spf	goldensyrian	m	39		hamster		challenge+clindamycin	survival	t	t	87	vpi10463	1000000	cfu		5	25	5	mg/kg	qd	5	vancomycin	1	acute	500	5000	125	mg	qid	10	antibiotic	vancomycin	yes	therapeutic	all	adult,olderadult	phase2	0.893939
https://pubmed.ncbi.nlm.nih.gov/33495229	2021	acute	spf	goldensyrian	m	39		hamster		challenge+clindamycin	survival	t	t	87	vpi10463	1000000	cfu		5	25	5	mg/kg	qd	5	vancomycin	1	sustained	500	5000	125	mg	qid	10	antibiotic	vancomycin	yes	therapeutic	all	adult,olderadult	phase2	0.644068
https://pubmed.ncbi.nlm.nih.gov/33495229	2021	acute	spf	goldensyrian	m	39		hamster		challenge+clindamycin	survival	t	t	87	vpi10463	1000000	cfu		5	25	5	mg/kg	qd	5	vancomycin	1	sustained	125		125	mg	qd		antibiotic	vancomycin	no	prophylactic	all	olderadult	phase4	1
https://pubmed.ncbi.nlm.nih.gov/33495229	2021	acute	spf	goldensyrian	m	39		hamster		challenge+clindamycin	survival	t	t	87	vpi10463	1000000	cfu		5	25	5	mg/kg	qd	5	vancomycin	1	acute	500	5000	125	mg	qid	10	antibiotic	vancomycin	no	therapeutic	all	adult,olderadult	phase3	0.853821
https://pubmed.ncbi.nlm.nih.gov/33495229	2021	acute	spf	goldensyrian	m	39		hamster		challenge+clindamycin	survival	t	t	87	vpi10463	1000000	cfu		5	25	5	mg/kg	qd	5	vancomycin	1	sustained	500	5000	125	mg	qid	10	antibiotic	vancomycin	no	therapeutic	all	adult,olderadult	phase3	0.61794
https://pubmed.ncbi.nlm.nih.gov/33495229	2021	acute	spf	goldensyrian	m	39		hamster		challenge+clindamycin	survival	t	t	87	vpi10463	1000000	cfu		5	25	5	mg/kg	qd	5	vancomycin	1	acute	500	5000	125	mg	qid	10	antibiotic	vancomycin	no	therapeutic	all	adult,olderadult	phase3	0.849057
https://pubmed.ncbi.nlm.nih.gov/33495229	2021	acute	spf	goldensyrian	m	39		hamster		challenge+clindamycin	survival	t	t	87	vpi10463	1000000	cfu		5	25	5	mg/kg	qd	5	vancomycin	1	sustained	500	5000	125	mg	qid	10	antibiotic	vancomycin	no	therapeutic	all	adult,olderadult	phase3	0.622642
https://pubmed.ncbi.nlm.nih.gov/33495229	2021	acute	spf	goldensyrian	m	39		hamster		challenge+clindamycin	survival	t	t	87	vpi10463	1000000	cfu		5	25	5	mg/kg	qd	5	vancomycin	1	acute	500	5000	125	mg	qid	10	antibiotic	vancomycin	no	therapeutic	all	adult,olderadult	phase4	0.821229
https://pubmed.ncbi.nlm.nih.gov/33495229	2021	acute	spf	goldensyrian	m	39		hamster		challenge+clindamycin	survival	t	t	87	vpi10463	1000000	cfu		5	25	5	mg/kg	qd	5	vancomycin	1	sustained	500	5000	125	mg	qid	10	antibiotic	vancomycin	no	therapeutic	all	adult,olderadult	phase4	0.592179
https://pubmed.ncbi.nlm.nih.gov/33495229	2021	acute	spf	goldensyrian	m	39		hamster		challenge+clindamycin	survival	t	t	87	vpi10463	1000000	cfu		5	25	5	mg/kg	qd	5	vancomycin	1	acute	500	5000	125	mg	qid	10	antibiotic	vancomycin	no	therapeutic	all	adult,olderadult	phase3	0.835714
https://pubmed.ncbi.nlm.nih.gov/33495229	2021	acute	spf	goldensyrian	m	39		hamster		challenge+clindamycin	survival	t	t	87	vpi10463	1000000	cfu		5	25	5	mg/kg	qd	5	vancomycin	1	sustained	500	5000	125	mg	qid	10	antibiotic	vancomycin	no	therapeutic	all	adult,olderadult	phase3	0.610714
https://pubmed.ncbi.nlm.nih.gov/33495229	2021	acute	spf	goldensyrian	m	39		hamster		challenge+clindamycin	survival	t	t	87	vpi10463	1000000	cfu		5	25	5	mg/kg	qd	5	vancomycin	1	acute	500	5000	125	mg	qid	10	antibiotic	vancomycin	no	therapeutic	all	adult,olderadult	phase3	0.818493
https://pubmed.ncbi.nlm.nih.gov/33495229	2021	acute	spf	goldensyrian	m	39		hamster		challenge+clindamycin	survival	t	t	87	vpi10463	1000000	cfu		5	25	5	mg/kg	qd	5	vancomycin	1	sustained	500	5000	125	mg	qid	10	antibiotic	vancomycin	no	therapeutic	all	adult,olderadult	phase3	0.589041
https://pubmed.ncbi.nlm.nih.gov/33495229	2021	acute	spf	goldensyrian	m	39		hamster		challenge+clindamycin	survival	t	t	87	vpi10463	1000000	cfu		5	25	5	mg/kg	qd	5	vancomycin	1	acute	500	5000	125	mg	qid	10	antibiotic	vancomycin	no	therapeutic	all	adult,olderadult	phase3	0.87963
https://pubmed.ncbi.nlm.nih.gov/33495229	2021	acute	spf	goldensyrian	m	39		hamster		challenge+clindamycin	survival	t	t	87	vpi10463	1000000	cfu		5	25	5	mg/kg	qd	5	vancomycin	1	sustained	500	5000	125	mg	qid	10	antibiotic	vancomycin	no	therapeutic	all	adult,olderadult	phase3	0.657407
https://pubmed.ncbi.nlm.nih.gov/33495229	2021	acute	spf	goldensyrian	m	39		hamster		challenge+clindamycin	survival	t	t	87	vpi10463	1000000	cfu		5	25	5	mg/kg	qd	5	vancomycin	1	acute	500	5000	125	mg	qid	10	antibiotic	vancomycin	no	therapeutic	all	adult,olderadult	phase3	0.1875
https://pubmed.ncbi.nlm.nih.gov/33495229	2021	acute	spf	goldensyrian	m	39		hamster		challenge+clindamycin	survival	t	t	87	vpi10463	1000000	cfu		5	25	5	mg/kg	qd	5	vancomycin	1	sustained	500	5000	125	mg	qid	10	antibiotic	vancomycin	no	therapeutic	all	adult,olderadult	phase3	0.3125
https://pubmed.ncbi.nlm.nih.gov/33495229	2021	acute	spf	goldensyrian	m	39		hamster		challenge+clindamycin	survival	t	t	87	vpi10463	1000000	cfu		5	25	5	mg/kg	qd	5	vancomycin	1	acute	500	5000	125	mg	qid	10	antibiotic	vancomycin	yes	therapeutic	all	adult,olderadult	phase2	0.863636
https://pubmed.ncbi.nlm.nih.gov/33495229	2021	acute	spf	goldensyrian	m	39		hamster		challenge+clindamycin	survival	t	t	87	vpi10463	1000000	cfu		5	25	5	mg/kg	qd	5	vancomycin	1	sustained	500	5000	125	mg	qid	10	antibiotic	vancomycin	yes	therapeutic	all	adult,olderadult	phase2	0.545455
https://pubmed.ncbi.nlm.nih.gov/33495229	2021	acute	spf	goldensyrian	m	39		hamster		challenge+clindamycin	survival	t	t	87	vpi10463	1000000	cfu		5	25	5	mg/kg	qd	5	vancomycin	1	acute	500	5000	125	mg	qid	10	antibiotic	vancomycin	no	therapeutic	all	child	phase3	0.704545
https://pubmed.ncbi.nlm.nih.gov/33495229	2021	acute	spf	goldensyrian	m	39		hamster		challenge+clindamycin	survival	t	t	87	vpi10463	1000000	cfu		5	25	5	mg/kg	qd	5	vancomycin	1	sustained	500	5000	125	mg	qid	10	antibiotic	vancomycin	no	therapeutic	all	child	phase3	0.741935
https://pubmed.ncbi.nlm.nih.gov/33495229	2021	acute	spf	goldensyrian	m	39		hamster		challenge+clindamycin	survival	t	t	87	vpi10463	1000000	cfu		5	25	5	mg/kg	qd	5	vancomycin	1	acute	500	5000	125	mg	qid	10	antibiotic	vancomycin	no	therapeutic	all	child,adult,olderadult	phase3	0.863281
https://pubmed.ncbi.nlm.nih.gov/33495229	2021	acute	spf	goldensyrian	m	39		hamster		challenge+clindamycin	survival	t	t	87	vpi10463	1000000	cfu		5	25	5	mg/kg	qd	5	vancomycin	1	sustained	500	5000	125	mg	qid	10	antibiotic	vancomycin	no	therapeutic	all	child,adult,olderadult	phase3	0.779279
https://pubmed.ncbi.nlm.nih.gov/33495229	2021	acute	spf	goldensyrian	m	39		hamster		challenge+clindamycin	survival	t	t	87	vpi10463	1000000	cfu		5	25	5	mg/kg	qd	5	vancomycin	1	acute	500	5000	125	mg	qid	10	antibiotic	vancomycin	no	therapeutic	all	child,adult,olderadult	phase3	0.856678
https://pubmed.ncbi.nlm.nih.gov/33495229	2021	acute	spf	goldensyrian	m	39		hamster		challenge+clindamycin	survival	t	t	87	vpi10463	1000000	cfu		5	25	5	mg/kg	qd	5	vancomycin	1	sustained	500	5000	125	mg	qid	10	antibiotic	vancomycin	no	therapeutic	all	child,adult,olderadult	phase3	0.745247
https://pubmed.ncbi.nlm.nih.gov/33495229	2021	acute	spf	goldensyrian	m	39		hamster		challenge+clindamycin	survival	t	t	87	vpi10463	1000000	cfu		5	25	5	mg/kg	qd	5	vancomycin	1	acute	500	5000	125	mg	qid	10	antibiotic	vancomycin	no	therapeutic	all	adult,olderadult	phase3	0.634783
https://pubmed.ncbi.nlm.nih.gov/33495229	2021	acute	spf	goldensyrian	m	39		hamster		challenge+clindamycin	survival	t	t	87	vpi10463	1000000	cfu		5	25	5	mg/kg	qd	5	vancomycin	1	sustained	500	5000	125	mg	qid	10	antibiotic	vancomycin	no	therapeutic	all	adult,olderadult	phase3	0.863014
https://pubmed.ncbi.nlm.nih.gov/33495229	2021	acute	spf	goldensyrian	m	39		hamster		challenge+clindamycin	survival	t	t	87	vpi10463	1000000	cfu		5	25	5	mg/kg	qd	5	vancomycin	1	acute	500	5000	125	mg	qid	10	antibiotic	vancomycin	no	therapeutic	all	adult,olderadult	phase3	0.808
https://pubmed.ncbi.nlm.nih.gov/33495229	2021	acute	spf	goldensyrian	m	39		hamster		challenge+clindamycin	survival	t	t	87	vpi10463	1000000	cfu		5	25	5	mg/kg	qd	5	vancomycin	1	sustained	500	5000	125	mg	qid	10	antibiotic	vancomycin	no	therapeutic	all	adult,olderadult	phase3	0.823529
https://pubmed.ncbi.nlm.nih.gov/33495229	2021	acute	spf	goldensyrian	m	39		hamster		challenge+clindamycin	survival	t	t	87	vpi10463	1000000	cfu		5	25	5	mg/kg	qd	5	vancomycin	1	acute	500	5000	125	mg	qid	10	antibiotic	vancomycin	no	therapeutic	all	adult,olderadult	phase3	0.80597
https://pubmed.ncbi.nlm.nih.gov/33495229	2021	acute	spf	goldensyrian	m	39		hamster		challenge+clindamycin	survival	t	t	87	vpi10463	1000000	cfu		5	25	5	mg/kg	qd	5	vancomycin	1	sustained	500	5000	125	mg	qid	10	antibiotic	vancomycin	no	therapeutic	all	adult,olderadult	phase3	0.757009
https://pubmed.ncbi.nlm.nih.gov/33495229	2021	acute	spf	goldensyrian	m	39		hamster		challenge+clindamycin	survival	t	t	87	vpi10463	1000000	cfu		5	25	5	mg/kg	qd	5	vancomycin	1	acute	500	5000	125	mg	qid	10	antibiotic	vancomycin	no	therapeutic	all	adult,olderadult	phase2	0.69697
https://pubmed.ncbi.nlm.nih.gov/33495229	2021	acute	spf	goldensyrian	m	39		hamster		challenge+clindamycin	survival	t	t	87	vpi10463	1000000	cfu		5	25	5	mg/kg	qd	5	vancomycin	1	sustained	500	5000	125	mg	qid	10	antibiotic	vancomycin	no	therapeutic	all	adult,olderadult	phase2	0.608696
https://pubmed.ncbi.nlm.nih.gov/33495229	2021	acute	spf	goldensyrian	m	39		hamster		challenge+clindamycin	survival	t	t	87	vpi10463	1000000	cfu		5	25	5	mg/kg	qd	5	vancomycin	1	acute	500	5000	125	mg	qid	10	antibiotic	vancomycin	no	therapeutic	all	adult,olderadult	phase4	0.666667
https://pubmed.ncbi.nlm.nih.gov/33495229	2021	acute	spf	goldensyrian	m	39		hamster		challenge+clindamycin	survival	t	t	87	vpi10463	1000000	cfu		5	25	5	mg/kg	qd	5	vancomycin	1	acute	500	5000	125	mg	qid	10	antibiotic	vancomycin	no	therapeutic	all	adult,olderadult	phase4	1
https://pubmed.ncbi.nlm.nih.gov/33495229	2021	acute	spf	goldensyrian	m	39		hamster		challenge+clindamycin	survival	t	t	87	vpi10463	1000000	cfu		5	25	5	mg/kg	qd	5	vancomycin	1	sustained							control	vancomycin	no	therapeutic	all	adult,olderadult	phase3	0.740741
https://pubmed.ncbi.nlm.nih.gov/33495229	2021	acute	spf	goldensyrian	m	39		hamster		challenge+clindamycin	survival	t	t	87	vpi10463	1000000	cfu		5	25	5	mg/kg	qd	5	vancomycin	1	sustained							antibiotic	vancomycin	no	therapeutic	all	adult,olderadult	phase3	0.721519
https://pubmed.ncbi.nlm.nih.gov/33495229	2021	acute	spf	goldensyrian	m	39		hamster		challenge+clindamycin	survival	t	t	87	vpi10463	1000000	cfu		5	25	5	mg/kg	qd	5	vancomycin	1	sustained							antibiotic	vancomycin	no	therapeutic	all	adult,olderadult	phase2	0.263158
https://pubmed.ncbi.nlm.nih.gov/33495229	2021	acute	spf	goldensyrian	m	39		hamster		challenge+clindamycin	survival	t	t	87	vpi10463	1000000	cfu		5	25	5	mg/kg	qd	5	vancomycin	1	acute							antibiotic	vancomycin	no	therapeutic	all	adult,olderadult	phase2	0.306667
https://pubmed.ncbi.nlm.nih.gov/33495229	2021	acute	spf	goldensyrian	m	39		hamster		challenge+clindamycin	survival	t	t	87	vpi10463	1000000	cfu		5	25	5	mg/kg	qd	5	vancomycin	1	sustained							antibiotic	vancomycin	no	therapeutic	all	adult,olderadult	phase2	0.306667
https://pubmed.ncbi.nlm.nih.gov/33495229	2021	sustained	spf	goldensyrian	m	39		hamster		challenge+clindamycin	survival	t	t	87	vpi10463	1000000	cfu		0.04	0.2	0.04	mg/kg	qd	5	vancomycin	0	acute	500	5000	125	mg	qid	10	antibiotic	vancomycin	yes	therapeutic	all	adult,olderadult	phase2	0.893939
https://pubmed.ncbi.nlm.nih.gov/33495229	2021	sustained	spf	goldensyrian	m	39		hamster		challenge+clindamycin	survival	t	t	87	vpi10463	1000000	cfu		0.04	0.2	0.04	mg/kg	qd	5	vancomycin	0	sustained	500	5000	125	mg	qid	10	antibiotic	vancomycin	yes	therapeutic	all	adult,olderadult	phase2	0.644068
https://pubmed.ncbi.nlm.nih.gov/33495229	2021	sustained	spf	goldensyrian	m	39		hamster		challenge+clindamycin	survival	t	t	87	vpi10463	1000000	cfu		0.04	0.2	0.04	mg/kg	qd	5	vancomycin	0	sustained	125		125	mg	qd		antibiotic	vancomycin	no	prophylactic	all	olderadult	phase4	1
https://pubmed.ncbi.nlm.nih.gov/33495229	2021	sustained	spf	goldensyrian	m	39		hamster		challenge+clindamycin	survival	t	t	87	vpi10463	1000000	cfu		0.04	0.2	0.04	mg/kg	qd	5	vancomycin	0	acute	500	5000	125	mg	qid	10	antibiotic	vancomycin	no	therapeutic	all	adult,olderadult	phase3	0.853821
https://pubmed.ncbi.nlm.nih.gov/33495229	2021	sustained	spf	goldensyrian	m	39		hamster		challenge+clindamycin	survival	t	t	87	vpi10463	1000000	cfu		0.04	0.2	0.04	mg/kg	qd	5	vancomycin	0	sustained	500	5000	125	mg	qid	10	antibiotic	vancomycin	no	therapeutic	all	adult,olderadult	phase3	0.61794
https://pubmed.ncbi.nlm.nih.gov/33495229	2021	sustained	spf	goldensyrian	m	39		hamster		challenge+clindamycin	survival	t	t	87	vpi10463	1000000	cfu		0.04	0.2	0.04	mg/kg	qd	5	vancomycin	0	acute	500	5000	125	mg	qid	10	antibiotic	vancomycin	no	therapeutic	all	adult,olderadult	phase3	0.849057
https://pubmed.ncbi.nlm.nih.gov/33495229	2021	sustained	spf	goldensyrian	m	39		hamster		challenge+clindamycin	survival	t	t	87	vpi10463	1000000	cfu		0.04	0.2	0.04	mg/kg	qd	5	vancomycin	0	sustained	500	5000	125	mg	qid	10	antibiotic	vancomycin	no	therapeutic	all	adult,olderadult	phase3	0.622642
https://pubmed.ncbi.nlm.nih.gov/33495229	2021	sustained	spf	goldensyrian	m	39		hamster		challenge+clindamycin	survival	t	t	87	vpi10463	1000000	cfu		0.04	0.2	0.04	mg/kg	qd	5	vancomycin	0	acute	500	5000	125	mg	qid	10	antibiotic	vancomycin	no	therapeutic	all	adult,olderadult	phase4	0.821229
https://pubmed.ncbi.nlm.nih.gov/33495229	2021	sustained	spf	goldensyrian	m	39		hamster		challenge+clindamycin	survival	t	t	87	vpi10463	1000000	cfu		0.04	0.2	0.04	mg/kg	qd	5	vancomycin	0	sustained	500	5000	125	mg	qid	10	antibiotic	vancomycin	no	therapeutic	all	adult,olderadult	phase4	0.592179
https://pubmed.ncbi.nlm.nih.gov/33495229	2021	sustained	spf	goldensyrian	m	39		hamster		challenge+clindamycin	survival	t	t	87	vpi10463	1000000	cfu		0.04	0.2	0.04	mg/kg	qd	5	vancomycin	0	acute	500	5000	125	mg	qid	10	antibiotic	vancomycin	no	therapeutic	all	adult,olderadult	phase3	0.835714
https://pubmed.ncbi.nlm.nih.gov/33495229	2021	sustained	spf	goldensyrian	m	39		hamster		challenge+clindamycin	survival	t	t	87	vpi10463	1000000	cfu		0.04	0.2	0.04	mg/kg	qd	5	vancomycin	0	sustained	500	5000	125	mg	qid	10	antibiotic	vancomycin	no	therapeutic	all	adult,olderadult	phase3	0.610714
https://pubmed.ncbi.nlm.nih.gov/33495229	2021	sustained	spf	goldensyrian	m	39		hamster		challenge+clindamycin	survival	t	t	87	vpi10463	1000000	cfu		0.04	0.2	0.04	mg/kg	qd	5	vancomycin	0	acute	500	5000	125	mg	qid	10	antibiotic	vancomycin	no	therapeutic	all	adult,olderadult	phase3	0.818493
https://pubmed.ncbi.nlm.nih.gov/33495229	2021	sustained	spf	goldensyrian	m	39		hamster		challenge+clindamycin	survival	t	t	87	vpi10463	1000000	cfu		0.04	0.2	0.04	mg/kg	qd	5	vancomycin	0	sustained	500	5000	125	mg	qid	10	antibiotic	vancomycin	no	therapeutic	all	adult,olderadult	phase3	0.589041
https://pubmed.ncbi.nlm.nih.gov/33495229	2021	sustained	spf	goldensyrian	m	39		hamster		challenge+clindamycin	survival	t	t	87	vpi10463	1000000	cfu		0.04	0.2	0.04	mg/kg	qd	5	vancomycin	0	acute	500	5000	125	mg	qid	10	antibiotic	vancomycin	no	therapeutic	all	adult,olderadult	phase3	0.87963
https://pubmed.ncbi.nlm.nih.gov/33495229	2021	sustained	spf	goldensyrian	m	39		hamster		challenge+clindamycin	survival	t	t	87	vpi10463	1000000	cfu		0.04	0.2	0.04	mg/kg	qd	5	vancomycin	0	sustained	500	5000	125	mg	qid	10	antibiotic	vancomycin	no	therapeutic	all	adult,olderadult	phase3	0.657407
https://pubmed.ncbi.nlm.nih.gov/33495229	2021	sustained	spf	goldensyrian	m	39		hamster		challenge+clindamycin	survival	t	t	87	vpi10463	1000000	cfu		0.04	0.2	0.04	mg/kg	qd	5	vancomycin	0	acute	500	5000	125	mg	qid	10	antibiotic	vancomycin	no	therapeutic	all	adult,olderadult	phase3	0.1875
https://pubmed.ncbi.nlm.nih.gov/33495229	2021	sustained	spf	goldensyrian	m	39		hamster		challenge+clindamycin	survival	t	t	87	vpi10463	1000000	cfu		0.04	0.2	0.04	mg/kg	qd	5	vancomycin	0	sustained	500	5000	125	mg	qid	10	antibiotic	vancomycin	no	therapeutic	all	adult,olderadult	phase3	0.3125
https://pubmed.ncbi.nlm.nih.gov/33495229	2021	sustained	spf	goldensyrian	m	39		hamster		challenge+clindamycin	survival	t	t	87	vpi10463	1000000	cfu		0.04	0.2	0.04	mg/kg	qd	5	vancomycin	0	acute	500	5000	125	mg	qid	10	antibiotic	vancomycin	yes	therapeutic	all	adult,olderadult	phase2	0.863636
https://pubmed.ncbi.nlm.nih.gov/33495229	2021	sustained	spf	goldensyrian	m	39		hamster		challenge+clindamycin	survival	t	t	87	vpi10463	1000000	cfu		0.04	0.2	0.04	mg/kg	qd	5	vancomycin	0	sustained	500	5000	125	mg	qid	10	antibiotic	vancomycin	yes	therapeutic	all	adult,olderadult	phase2	0.545455
https://pubmed.ncbi.nlm.nih.gov/33495229	2021	sustained	spf	goldensyrian	m	39		hamster		challenge+clindamycin	survival	t	t	87	vpi10463	1000000	cfu		0.04	0.2	0.04	mg/kg	qd	5	vancomycin	0	acute	500	5000	125	mg	qid	10	antibiotic	vancomycin	no	therapeutic	all	child	phase3	0.704545
https://pubmed.ncbi.nlm.nih.gov/33495229	2021	sustained	spf	goldensyrian	m	39		hamster		challenge+clindamycin	survival	t	t	87	vpi10463	1000000	cfu		0.04	0.2	0.04	mg/kg	qd	5	vancomycin	0	sustained	500	5000	125	mg	qid	10	antibiotic	vancomycin	no	therapeutic	all	child	phase3	0.741935
https://pubmed.ncbi.nlm.nih.gov/33495229	2021	sustained	spf	goldensyrian	m	39		hamster		challenge+clindamycin	survival	t	t	87	vpi10463	1000000	cfu		0.04	0.2	0.04	mg/kg	qd	5	vancomycin	0	acute	500	5000	125	mg	qid	10	antibiotic	vancomycin	no	therapeutic	all	child,adult,olderadult	phase3	0.863281
https://pubmed.ncbi.nlm.nih.gov/33495229	2021	sustained	spf	goldensyrian	m	39		hamster		challenge+clindamycin	survival	t	t	87	vpi10463	1000000	cfu		0.04	0.2	0.04	mg/kg	qd	5	vancomycin	0	sustained	500	5000	125	mg	qid	10	antibiotic	vancomycin	no	therapeutic	all	child,adult,olderadult	phase3	0.779279
https://pubmed.ncbi.nlm.nih.gov/33495229	2021	sustained	spf	goldensyrian	m	39		hamster		challenge+clindamycin	survival	t	t	87	vpi10463	1000000	cfu		0.04	0.2	0.04	mg/kg	qd	5	vancomycin	0	acute	500	5000	125	mg	qid	10	antibiotic	vancomycin	no	therapeutic	all	child,adult,olderadult	phase3	0.856678
https://pubmed.ncbi.nlm.nih.gov/33495229	2021	sustained	spf	goldensyrian	m	39		hamster		challenge+clindamycin	survival	t	t	87	vpi10463	1000000	cfu		0.04	0.2	0.04	mg/kg	qd	5	vancomycin	0	sustained	500	5000	125	mg	qid	10	antibiotic	vancomycin	no	therapeutic	all	child,adult,olderadult	phase3	0.745247
https://pubmed.ncbi.nlm.nih.gov/33495229	2021	sustained	spf	goldensyrian	m	39		hamster		challenge+clindamycin	survival	t	t	87	vpi10463	1000000	cfu		0.04	0.2	0.04	mg/kg	qd	5	vancomycin	0	acute	500	5000	125	mg	qid	10	antibiotic	vancomycin	no	therapeutic	all	adult,olderadult	phase3	0.634783
https://pubmed.ncbi.nlm.nih.gov/33495229	2021	sustained	spf	goldensyrian	m	39		hamster		challenge+clindamycin	survival	t	t	87	vpi10463	1000000	cfu		0.04	0.2	0.04	mg/kg	qd	5	vancomycin	0	sustained	500	5000	125	mg	qid	10	antibiotic	vancomycin	no	therapeutic	all	adult,olderadult	phase3	0.863014
https://pubmed.ncbi.nlm.nih.gov/33495229	2021	sustained	spf	goldensyrian	m	39		hamster		challenge+clindamycin	survival	t	t	87	vpi10463	1000000	cfu		0.04	0.2	0.04	mg/kg	qd	5	vancomycin	0	acute	500	5000	125	mg	qid	10	antibiotic	vancomycin	no	therapeutic	all	adult,olderadult	phase3	0.808
https://pubmed.ncbi.nlm.nih.gov/33495229	2021	sustained	spf	goldensyrian	m	39		hamster		challenge+clindamycin	survival	t	t	87	vpi10463	1000000	cfu		0.04	0.2	0.04	mg/kg	qd	5	vancomycin	0	sustained	500	5000	125	mg	qid	10	antibiotic	vancomycin	no	therapeutic	all	adult,olderadult	phase3	0.823529
https://pubmed.ncbi.nlm.nih.gov/33495229	2021	sustained	spf	goldensyrian	m	39		hamster		challenge+clindamycin	survival	t	t	87	vpi10463	1000000	cfu		0.04	0.2	0.04	mg/kg	qd	5	vancomycin	0	acute	500	5000	125	mg	qid	10	antibiotic	vancomycin	no	therapeutic	all	adult,olderadult	phase3	0.80597
https://pubmed.ncbi.nlm.nih.gov/33495229	2021	sustained	spf	goldensyrian	m	39		hamster		challenge+clindamycin	survival	t	t	87	vpi10463	1000000	cfu		0.04	0.2	0.04	mg/kg	qd	5	vancomycin	0	sustained	500	5000	125	mg	qid	10	antibiotic	vancomycin	no	therapeutic	all	adult,olderadult	phase3	0.757009
https://pubmed.ncbi.nlm.nih.gov/33495229	2021	sustained	spf	goldensyrian	m	39		hamster		challenge+clindamycin	survival	t	t	87	vpi10463	1000000	cfu		0.04	0.2	0.04	mg/kg	qd	5	vancomycin	0	acute	500	5000	125	mg	qid	10	antibiotic	vancomycin	no	therapeutic	all	adult,olderadult	phase2	0.69697
https://pubmed.ncbi.nlm.nih.gov/33495229	2021	sustained	spf	goldensyrian	m	39		hamster		challenge+clindamycin	survival	t	t	87	vpi10463	1000000	cfu		0.04	0.2	0.04	mg/kg	qd	5	vancomycin	0	sustained	500	5000	125	mg	qid	10	antibiotic	vancomycin	no	therapeutic	all	adult,olderadult	phase2	0.608696
https://pubmed.ncbi.nlm.nih.gov/33495229	2021	sustained	spf	goldensyrian	m	39		hamster		challenge+clindamycin	survival	t	t	87	vpi10463	1000000	cfu		0.04	0.2	0.04	mg/kg	qd	5	vancomycin	0	acute	500	5000	125	mg	qid	10	antibiotic	vancomycin	no	therapeutic	all	adult,olderadult	phase4	0.666667
https://pubmed.ncbi.nlm.nih.gov/33495229	2021	sustained	spf	goldensyrian	m	39		hamster		challenge+clindamycin	survival	t	t	87	vpi10463	1000000	cfu		0.04	0.2	0.04	mg/kg	qd	5	vancomycin	0	acute	500	5000	125	mg	qid	10	antibiotic	vancomycin	no	therapeutic	all	adult,olderadult	phase4	1
https://pubmed.ncbi.nlm.nih.gov/33495229	2021	sustained	spf	goldensyrian	m	39		hamster		challenge+clindamycin	survival	t	t	87	vpi10463	1000000	cfu		0.04	0.2	0.04	mg/kg	qd	5	vancomycin	0	sustained							control	vancomycin	no	therapeutic	all	adult,olderadult	phase3	0.740741
https://pubmed.ncbi.nlm.nih.gov/33495229	2021	sustained	spf	goldensyrian	m	39		hamster		challenge+clindamycin	survival	t	t	87	vpi10463	1000000	cfu		0.04	0.2	0.04	mg/kg	qd	5	vancomycin	0	sustained							antibiotic	vancomycin	no	therapeutic	all	adult,olderadult	phase3	0.721519
https://pubmed.ncbi.nlm.nih.gov/33495229	2021	sustained	spf	goldensyrian	m	39		hamster		challenge+clindamycin	survival	t	t	87	vpi10463	1000000	cfu		0.04	0.2	0.04	mg/kg	qd	5	vancomycin	0	sustained							antibiotic	vancomycin	no	therapeutic	all	adult,olderadult	phase2	0.263158
https://pubmed.ncbi.nlm.nih.gov/33495229	2021	sustained	spf	goldensyrian	m	39		hamster		challenge+clindamycin	survival	t	t	87	vpi10463	1000000	cfu		0.04	0.2	0.04	mg/kg	qd	5	vancomycin	0	acute							antibiotic	vancomycin	no	therapeutic	all	adult,olderadult	phase2	0.306667
https://pubmed.ncbi.nlm.nih.gov/33495229	2021	sustained	spf	goldensyrian	m	39		hamster		challenge+clindamycin	survival	t	t	87	vpi10463	1000000	cfu		0.04	0.2	0.04	mg/kg	qd	5	vancomycin	0	sustained							antibiotic	vancomycin	no	therapeutic	all	adult,olderadult	phase2	0.306667
https://pubmed.ncbi.nlm.nih.gov/33495229	2021	sustained	spf	goldensyrian	m	39		hamster		challenge+clindamycin	survival	t	t	87	vpi10463	1000000	cfu		0.2	1	0.2	mg/kg	qd	5	vancomycin	0	acute	500	5000	125	mg	qid	10	antibiotic	vancomycin	yes	therapeutic	all	adult,olderadult	phase2	0.893939
https://pubmed.ncbi.nlm.nih.gov/33495229	2021	sustained	spf	goldensyrian	m	39		hamster		challenge+clindamycin	survival	t	t	87	vpi10463	1000000	cfu		0.2	1	0.2	mg/kg	qd	5	vancomycin	0	sustained	500	5000	125	mg	qid	10	antibiotic	vancomycin	yes	therapeutic	all	adult,olderadult	phase2	0.644068
https://pubmed.ncbi.nlm.nih.gov/33495229	2021	sustained	spf	goldensyrian	m	39		hamster		challenge+clindamycin	survival	t	t	87	vpi10463	1000000	cfu		0.2	1	0.2	mg/kg	qd	5	vancomycin	0	sustained	125		125	mg	qd		antibiotic	vancomycin	no	prophylactic	all	olderadult	phase4	1
https://pubmed.ncbi.nlm.nih.gov/33495229	2021	sustained	spf	goldensyrian	m	39		hamster		challenge+clindamycin	survival	t	t	87	vpi10463	1000000	cfu		0.2	1	0.2	mg/kg	qd	5	vancomycin	0	acute	500	5000	125	mg	qid	10	antibiotic	vancomycin	no	therapeutic	all	adult,olderadult	phase3	0.853821
https://pubmed.ncbi.nlm.nih.gov/33495229	2021	sustained	spf	goldensyrian	m	39		hamster		challenge+clindamycin	survival	t	t	87	vpi10463	1000000	cfu		0.2	1	0.2	mg/kg	qd	5	vancomycin	0	sustained	500	5000	125	mg	qid	10	antibiotic	vancomycin	no	therapeutic	all	adult,olderadult	phase3	0.61794
https://pubmed.ncbi.nlm.nih.gov/33495229	2021	sustained	spf	goldensyrian	m	39		hamster		challenge+clindamycin	survival	t	t	87	vpi10463	1000000	cfu		0.2	1	0.2	mg/kg	qd	5	vancomycin	0	acute	500	5000	125	mg	qid	10	antibiotic	vancomycin	no	therapeutic	all	adult,olderadult	phase3	0.849057
https://pubmed.ncbi.nlm.nih.gov/33495229	2021	sustained	spf	goldensyrian	m	39		hamster		challenge+clindamycin	survival	t	t	87	vpi10463	1000000	cfu		0.2	1	0.2	mg/kg	qd	5	vancomycin	0	sustained	500	5000	125	mg	qid	10	antibiotic	vancomycin	no	therapeutic	all	adult,olderadult	phase3	0.622642
https://pubmed.ncbi.nlm.nih.gov/33495229	2021	sustained	spf	goldensyrian	m	39		hamster		challenge+clindamycin	survival	t	t	87	vpi10463	1000000	cfu		0.2	1	0.2	mg/kg	qd	5	vancomycin	0	acute	500	5000	125	mg	qid	10	antibiotic	vancomycin	no	therapeutic	all	adult,olderadult	phase4	0.821229
https://pubmed.ncbi.nlm.nih.gov/33495229	2021	sustained	spf	goldensyrian	m	39		hamster		challenge+clindamycin	survival	t	t	87	vpi10463	1000000	cfu		0.2	1	0.2	mg/kg	qd	5	vancomycin	0	sustained	500	5000	125	mg	qid	10	antibiotic	vancomycin	no	therapeutic	all	adult,olderadult	phase4	0.592179
https://pubmed.ncbi.nlm.nih.gov/33495229	2021	sustained	spf	goldensyrian	m	39		hamster		challenge+clindamycin	survival	t	t	87	vpi10463	1000000	cfu		0.2	1	0.2	mg/kg	qd	5	vancomycin	0	acute	500	5000	125	mg	qid	10	antibiotic	vancomycin	no	therapeutic	all	adult,olderadult	phase3	0.835714
https://pubmed.ncbi.nlm.nih.gov/33495229	2021	sustained	spf	goldensyrian	m	39		hamster		challenge+clindamycin	survival	t	t	87	vpi10463	1000000	cfu		0.2	1	0.2	mg/kg	qd	5	vancomycin	0	sustained	500	5000	125	mg	qid	10	antibiotic	vancomycin	no	therapeutic	all	adult,olderadult	phase3	0.610714
https://pubmed.ncbi.nlm.nih.gov/33495229	2021	sustained	spf	goldensyrian	m	39		hamster		challenge+clindamycin	survival	t	t	87	vpi10463	1000000	cfu		0.2	1	0.2	mg/kg	qd	5	vancomycin	0	acute	500	5000	125	mg	qid	10	antibiotic	vancomycin	no	therapeutic	all	adult,olderadult	phase3	0.818493
https://pubmed.ncbi.nlm.nih.gov/33495229	2021	sustained	spf	goldensyrian	m	39		hamster		challenge+clindamycin	survival	t	t	87	vpi10463	1000000	cfu		0.2	1	0.2	mg/kg	qd	5	vancomycin	0	sustained	500	5000	125	mg	qid	10	antibiotic	vancomycin	no	therapeutic	all	adult,olderadult	phase3	0.589041
https://pubmed.ncbi.nlm.nih.gov/33495229	2021	sustained	spf	goldensyrian	m	39		hamster		challenge+clindamycin	survival	t	t	87	vpi10463	1000000	cfu		0.2	1	0.2	mg/kg	qd	5	vancomycin	0	acute	500	5000	125	mg	qid	10	antibiotic	vancomycin	no	therapeutic	all	adult,olderadult	phase3	0.87963
https://pubmed.ncbi.nlm.nih.gov/33495229	2021	sustained	spf	goldensyrian	m	39		hamster		challenge+clindamycin	survival	t	t	87	vpi10463	1000000	cfu		0.2	1	0.2	mg/kg	qd	5	vancomycin	0	sustained	500	5000	125	mg	qid	10	antibiotic	vancomycin	no	therapeutic	all	adult,olderadult	phase3	0.657407
https://pubmed.ncbi.nlm.nih.gov/33495229	2021	sustained	spf	goldensyrian	m	39		hamster		challenge+clindamycin	survival	t	t	87	vpi10463	1000000	cfu		0.2	1	0.2	mg/kg	qd	5	vancomycin	0	acute	500	5000	125	mg	qid	10	antibiotic	vancomycin	no	therapeutic	all	adult,olderadult	phase3	0.1875
https://pubmed.ncbi.nlm.nih.gov/33495229	2021	sustained	spf	goldensyrian	m	39		hamster		challenge+clindamycin	survival	t	t	87	vpi10463	1000000	cfu		0.2	1	0.2	mg/kg	qd	5	vancomycin	0	sustained	500	5000	125	mg	qid	10	antibiotic	vancomycin	no	therapeutic	all	adult,olderadult	phase3	0.3125
https://pubmed.ncbi.nlm.nih.gov/33495229	2021	sustained	spf	goldensyrian	m	39		hamster		challenge+clindamycin	survival	t	t	87	vpi10463	1000000	cfu		0.2	1	0.2	mg/kg	qd	5	vancomycin	0	acute	500	5000	125	mg	qid	10	antibiotic	vancomycin	yes	therapeutic	all	adult,olderadult	phase2	0.863636
https://pubmed.ncbi.nlm.nih.gov/33495229	2021	sustained	spf	goldensyrian	m	39		hamster		challenge+clindamycin	survival	t	t	87	vpi10463	1000000	cfu		0.2	1	0.2	mg/kg	qd	5	vancomycin	0	sustained	500	5000	125	mg	qid	10	antibiotic	vancomycin	yes	therapeutic	all	adult,olderadult	phase2	0.545455
https://pubmed.ncbi.nlm.nih.gov/33495229	2021	sustained	spf	goldensyrian	m	39		hamster		challenge+clindamycin	survival	t	t	87	vpi10463	1000000	cfu		0.2	1	0.2	mg/kg	qd	5	vancomycin	0	acute	500	5000	125	mg	qid	10	antibiotic	vancomycin	no	therapeutic	all	child	phase3	0.704545
https://pubmed.ncbi.nlm.nih.gov/33495229	2021	sustained	spf	goldensyrian	m	39		hamster		challenge+clindamycin	survival	t	t	87	vpi10463	1000000	cfu		0.2	1	0.2	mg/kg	qd	5	vancomycin	0	sustained	500	5000	125	mg	qid	10	antibiotic	vancomycin	no	therapeutic	all	child	phase3	0.741935
https://pubmed.ncbi.nlm.nih.gov/33495229	2021	sustained	spf	goldensyrian	m	39		hamster		challenge+clindamycin	survival	t	t	87	vpi10463	1000000	cfu		0.2	1	0.2	mg/kg	qd	5	vancomycin	0	acute	500	5000	125	mg	qid	10	antibiotic	vancomycin	no	therapeutic	all	child,adult,olderadult	phase3	0.863281
https://pubmed.ncbi.nlm.nih.gov/33495229	2021	sustained	spf	goldensyrian	m	39		hamster		challenge+clindamycin	survival	t	t	87	vpi10463	1000000	cfu		0.2	1	0.2	mg/kg	qd	5	vancomycin	0	sustained	500	5000	125	mg	qid	10	antibiotic	vancomycin	no	therapeutic	all	child,adult,olderadult	phase3	0.779279
https://pubmed.ncbi.nlm.nih.gov/33495229	2021	sustained	spf	goldensyrian	m	39		hamster		challenge+clindamycin	survival	t	t	87	vpi10463	1000000	cfu		0.2	1	0.2	mg/kg	qd	5	vancomycin	0	acute	500	5000	125	mg	qid	10	antibiotic	vancomycin	no	therapeutic	all	child,adult,olderadult	phase3	0.856678
https://pubmed.ncbi.nlm.nih.gov/33495229	2021	sustained	spf	goldensyrian	m	39		hamster		challenge+clindamycin	survival	t	t	87	vpi10463	1000000	cfu		0.2	1	0.2	mg/kg	qd	5	vancomycin	0	sustained	500	5000	125	mg	qid	10	antibiotic	vancomycin	no	therapeutic	all	child,adult,olderadult	phase3	0.745247
https://pubmed.ncbi.nlm.nih.gov/33495229	2021	sustained	spf	goldensyrian	m	39		hamster		challenge+clindamycin	survival	t	t	87	vpi10463	1000000	cfu		0.2	1	0.2	mg/kg	qd	5	vancomycin	0	acute	500	5000	125	mg	qid	10	antibiotic	vancomycin	no	therapeutic	all	adult,olderadult	phase3	0.634783
https://pubmed.ncbi.nlm.nih.gov/33495229	2021	sustained	spf	goldensyrian	m	39		hamster		challenge+clindamycin	survival	t	t	87	vpi10463	1000000	cfu		0.2	1	0.2	mg/kg	qd	5	vancomycin	0	sustained	500	5000	125	mg	qid	10	antibiotic	vancomycin	no	therapeutic	all	adult,olderadult	phase3	0.863014
https://pubmed.ncbi.nlm.nih.gov/33495229	2021	sustained	spf	goldensyrian	m	39		hamster		challenge+clindamycin	survival	t	t	87	vpi10463	1000000	cfu		0.2	1	0.2	mg/kg	qd	5	vancomycin	0	acute	500	5000	125	mg	qid	10	antibiotic	vancomycin	no	therapeutic	all	adult,olderadult	phase3	0.808
https://pubmed.ncbi.nlm.nih.gov/33495229	2021	sustained	spf	goldensyrian	m	39		hamster		challenge+clindamycin	survival	t	t	87	vpi10463	1000000	cfu		0.2	1	0.2	mg/kg	qd	5	vancomycin	0	sustained	500	5000	125	mg	qid	10	antibiotic	vancomycin	no	therapeutic	all	adult,olderadult	phase3	0.823529
https://pubmed.ncbi.nlm.nih.gov/33495229	2021	sustained	spf	goldensyrian	m	39		hamster		challenge+clindamycin	survival	t	t	87	vpi10463	1000000	cfu		0.2	1	0.2	mg/kg	qd	5	vancomycin	0	acute	500	5000	125	mg	qid	10	antibiotic	vancomycin	no	therapeutic	all	adult,olderadult	phase3	0.80597
https://pubmed.ncbi.nlm.nih.gov/33495229	2021	sustained	spf	goldensyrian	m	39		hamster		challenge+clindamycin	survival	t	t	87	vpi10463	1000000	cfu		0.2	1	0.2	mg/kg	qd	5	vancomycin	0	sustained	500	5000	125	mg	qid	10	antibiotic	vancomycin	no	therapeutic	all	adult,olderadult	phase3	0.757009
https://pubmed.ncbi.nlm.nih.gov/33495229	2021	sustained	spf	goldensyrian	m	39		hamster		challenge+clindamycin	survival	t	t	87	vpi10463	1000000	cfu		0.2	1	0.2	mg/kg	qd	5	vancomycin	0	acute	500	5000	125	mg	qid	10	antibiotic	vancomycin	no	therapeutic	all	adult,olderadult	phase2	0.69697
https://pubmed.ncbi.nlm.nih.gov/33495229	2021	sustained	spf	goldensyrian	m	39		hamster		challenge+clindamycin	survival	t	t	87	vpi10463	1000000	cfu		0.2	1	0.2	mg/kg	qd	5	vancomycin	0	sustained	500	5000	125	mg	qid	10	antibiotic	vancomycin	no	therapeutic	all	adult,olderadult	phase2	0.608696
https://pubmed.ncbi.nlm.nih.gov/33495229	2021	sustained	spf	goldensyrian	m	39		hamster		challenge+clindamycin	survival	t	t	87	vpi10463	1000000	cfu		0.2	1	0.2	mg/kg	qd	5	vancomycin	0	acute	500	5000	125	mg	qid	10	antibiotic	vancomycin	no	therapeutic	all	adult,olderadult	phase4	0.666667
https://pubmed.ncbi.nlm.nih.gov/33495229	2021	sustained	spf	goldensyrian	m	39		hamster		challenge+clindamycin	survival	t	t	87	vpi10463	1000000	cfu		0.2	1	0.2	mg/kg	qd	5	vancomycin	0	acute	500	5000	125	mg	qid	10	antibiotic	vancomycin	no	therapeutic	all	adult,olderadult	phase4	1
https://pubmed.ncbi.nlm.nih.gov/33495229	2021	sustained	spf	goldensyrian	m	39		hamster		challenge+clindamycin	survival	t	t	87	vpi10463	1000000	cfu		0.2	1	0.2	mg/kg	qd	5	vancomycin	0	sustained							control	vancomycin	no	therapeutic	all	adult,olderadult	phase3	0.740741
https://pubmed.ncbi.nlm.nih.gov/33495229	2021	sustained	spf	goldensyrian	m	39		hamster		challenge+clindamycin	survival	t	t	87	vpi10463	1000000	cfu		0.2	1	0.2	mg/kg	qd	5	vancomycin	0	sustained							antibiotic	vancomycin	no	therapeutic	all	adult,olderadult	phase3	0.721519
https://pubmed.ncbi.nlm.nih.gov/33495229	2021	sustained	spf	goldensyrian	m	39		hamster		challenge+clindamycin	survival	t	t	87	vpi10463	1000000	cfu		0.2	1	0.2	mg/kg	qd	5	vancomycin	0	sustained							antibiotic	vancomycin	no	therapeutic	all	adult,olderadult	phase2	0.263158
https://pubmed.ncbi.nlm.nih.gov/33495229	2021	sustained	spf	goldensyrian	m	39		hamster		challenge+clindamycin	survival	t	t	87	vpi10463	1000000	cfu		0.2	1	0.2	mg/kg	qd	5	vancomycin	0	acute							antibiotic	vancomycin	no	therapeutic	all	adult,olderadult	phase2	0.306667
https://pubmed.ncbi.nlm.nih.gov/33495229	2021	sustained	spf	goldensyrian	m	39		hamster		challenge+clindamycin	survival	t	t	87	vpi10463	1000000	cfu		0.2	1	0.2	mg/kg	qd	5	vancomycin	0	sustained							antibiotic	vancomycin	no	therapeutic	all	adult,olderadult	phase2	0.306667
https://pubmed.ncbi.nlm.nih.gov/33495229	2021	sustained	spf	goldensyrian	m	39		hamster		challenge+clindamycin	survival	t	t	87	vpi10463	1000000	cfu		1	5	1	mg/kg	qd	5	vancomycin	0.5	acute	500	5000	125	mg	qid	10	antibiotic	vancomycin	yes	therapeutic	all	adult,olderadult	phase2	0.893939
https://pubmed.ncbi.nlm.nih.gov/33495229	2021	sustained	spf	goldensyrian	m	39		hamster		challenge+clindamycin	survival	t	t	87	vpi10463	1000000	cfu		1	5	1	mg/kg	qd	5	vancomycin	0.5	sustained	500	5000	125	mg	qid	10	antibiotic	vancomycin	yes	therapeutic	all	adult,olderadult	phase2	0.644068
https://pubmed.ncbi.nlm.nih.gov/33495229	2021	sustained	spf	goldensyrian	m	39		hamster		challenge+clindamycin	survival	t	t	87	vpi10463	1000000	cfu		1	5	1	mg/kg	qd	5	vancomycin	0.5	sustained	125		125	mg	qd		antibiotic	vancomycin	no	prophylactic	all	olderadult	phase4	1
https://pubmed.ncbi.nlm.nih.gov/33495229	2021	sustained	spf	goldensyrian	m	39		hamster		challenge+clindamycin	survival	t	t	87	vpi10463	1000000	cfu		1	5	1	mg/kg	qd	5	vancomycin	0.5	acute	500	5000	125	mg	qid	10	antibiotic	vancomycin	no	therapeutic	all	adult,olderadult	phase3	0.853821
https://pubmed.ncbi.nlm.nih.gov/33495229	2021	sustained	spf	goldensyrian	m	39		hamster		challenge+clindamycin	survival	t	t	87	vpi10463	1000000	cfu		1	5	1	mg/kg	qd	5	vancomycin	0.5	sustained	500	5000	125	mg	qid	10	antibiotic	vancomycin	no	therapeutic	all	adult,olderadult	phase3	0.61794
https://pubmed.ncbi.nlm.nih.gov/33495229	2021	sustained	spf	goldensyrian	m	39		hamster		challenge+clindamycin	survival	t	t	87	vpi10463	1000000	cfu		1	5	1	mg/kg	qd	5	vancomycin	0.5	acute	500	5000	125	mg	qid	10	antibiotic	vancomycin	no	therapeutic	all	adult,olderadult	phase3	0.849057
https://pubmed.ncbi.nlm.nih.gov/33495229	2021	sustained	spf	goldensyrian	m	39		hamster		challenge+clindamycin	survival	t	t	87	vpi10463	1000000	cfu		1	5	1	mg/kg	qd	5	vancomycin	0.5	sustained	500	5000	125	mg	qid	10	antibiotic	vancomycin	no	therapeutic	all	adult,olderadult	phase3	0.622642
https://pubmed.ncbi.nlm.nih.gov/33495229	2021	sustained	spf	goldensyrian	m	39		hamster		challenge+clindamycin	survival	t	t	87	vpi10463	1000000	cfu		1	5	1	mg/kg	qd	5	vancomycin	0.5	acute	500	5000	125	mg	qid	10	antibiotic	vancomycin	no	therapeutic	all	adult,olderadult	phase4	0.821229
https://pubmed.ncbi.nlm.nih.gov/33495229	2021	sustained	spf	goldensyrian	m	39		hamster		challenge+clindamycin	survival	t	t	87	vpi10463	1000000	cfu		1	5	1	mg/kg	qd	5	vancomycin	0.5	sustained	500	5000	125	mg	qid	10	antibiotic	vancomycin	no	therapeutic	all	adult,olderadult	phase4	0.592179
https://pubmed.ncbi.nlm.nih.gov/33495229	2021	sustained	spf	goldensyrian	m	39		hamster		challenge+clindamycin	survival	t	t	87	vpi10463	1000000	cfu		1	5	1	mg/kg	qd	5	vancomycin	0.5	acute	500	5000	125	mg	qid	10	antibiotic	vancomycin	no	therapeutic	all	adult,olderadult	phase3	0.835714
https://pubmed.ncbi.nlm.nih.gov/33495229	2021	sustained	spf	goldensyrian	m	39		hamster		challenge+clindamycin	survival	t	t	87	vpi10463	1000000	cfu		1	5	1	mg/kg	qd	5	vancomycin	0.5	sustained	500	5000	125	mg	qid	10	antibiotic	vancomycin	no	therapeutic	all	adult,olderadult	phase3	0.610714
https://pubmed.ncbi.nlm.nih.gov/33495229	2021	sustained	spf	goldensyrian	m	39		hamster		challenge+clindamycin	survival	t	t	87	vpi10463	1000000	cfu		1	5	1	mg/kg	qd	5	vancomycin	0.5	acute	500	5000	125	mg	qid	10	antibiotic	vancomycin	no	therapeutic	all	adult,olderadult	phase3	0.818493
https://pubmed.ncbi.nlm.nih.gov/33495229	2021	sustained	spf	goldensyrian	m	39		hamster		challenge+clindamycin	survival	t	t	87	vpi10463	1000000	cfu		1	5	1	mg/kg	qd	5	vancomycin	0.5	sustained	500	5000	125	mg	qid	10	antibiotic	vancomycin	no	therapeutic	all	adult,olderadult	phase3	0.589041
https://pubmed.ncbi.nlm.nih.gov/33495229	2021	sustained	spf	goldensyrian	m	39		hamster		challenge+clindamycin	survival	t	t	87	vpi10463	1000000	cfu		1	5	1	mg/kg	qd	5	vancomycin	0.5	acute	500	5000	125	mg	qid	10	antibiotic	vancomycin	no	therapeutic	all	adult,olderadult	phase3	0.87963
https://pubmed.ncbi.nlm.nih.gov/33495229	2021	sustained	spf	goldensyrian	m	39		hamster		challenge+clindamycin	survival	t	t	87	vpi10463	1000000	cfu		1	5	1	mg/kg	qd	5	vancomycin	0.5	sustained	500	5000	125	mg	qid	10	antibiotic	vancomycin	no	therapeutic	all	adult,olderadult	phase3	0.657407
https://pubmed.ncbi.nlm.nih.gov/33495229	2021	sustained	spf	goldensyrian	m	39		hamster		challenge+clindamycin	survival	t	t	87	vpi10463	1000000	cfu		1	5	1	mg/kg	qd	5	vancomycin	0.5	acute	500	5000	125	mg	qid	10	antibiotic	vancomycin	no	therapeutic	all	adult,olderadult	phase3	0.1875
https://pubmed.ncbi.nlm.nih.gov/33495229	2021	sustained	spf	goldensyrian	m	39		hamster		challenge+clindamycin	survival	t	t	87	vpi10463	1000000	cfu		1	5	1	mg/kg	qd	5	vancomycin	0.5	sustained	500	5000	125	mg	qid	10	antibiotic	vancomycin	no	therapeutic	all	adult,olderadult	phase3	0.3125
https://pubmed.ncbi.nlm.nih.gov/33495229	2021	sustained	spf	goldensyrian	m	39		hamster		challenge+clindamycin	survival	t	t	87	vpi10463	1000000	cfu		1	5	1	mg/kg	qd	5	vancomycin	0.5	acute	500	5000	125	mg	qid	10	antibiotic	vancomycin	yes	therapeutic	all	adult,olderadult	phase2	0.863636
https://pubmed.ncbi.nlm.nih.gov/33495229	2021	sustained	spf	goldensyrian	m	39		hamster		challenge+clindamycin	survival	t	t	87	vpi10463	1000000	cfu		1	5	1	mg/kg	qd	5	vancomycin	0.5	sustained	500	5000	125	mg	qid	10	antibiotic	vancomycin	yes	therapeutic	all	adult,olderadult	phase2	0.545455
https://pubmed.ncbi.nlm.nih.gov/33495229	2021	sustained	spf	goldensyrian	m	39		hamster		challenge+clindamycin	survival	t	t	87	vpi10463	1000000	cfu		1	5	1	mg/kg	qd	5	vancomycin	0.5	acute	500	5000	125	mg	qid	10	antibiotic	vancomycin	no	therapeutic	all	child	phase3	0.704545
https://pubmed.ncbi.nlm.nih.gov/33495229	2021	sustained	spf	goldensyrian	m	39		hamster		challenge+clindamycin	survival	t	t	87	vpi10463	1000000	cfu		1	5	1	mg/kg	qd	5	vancomycin	0.5	sustained	500	5000	125	mg	qid	10	antibiotic	vancomycin	no	therapeutic	all	child	phase3	0.741935
https://pubmed.ncbi.nlm.nih.gov/33495229	2021	sustained	spf	goldensyrian	m	39		hamster		challenge+clindamycin	survival	t	t	87	vpi10463	1000000	cfu		1	5	1	mg/kg	qd	5	vancomycin	0.5	acute	500	5000	125	mg	qid	10	antibiotic	vancomycin	no	therapeutic	all	child,adult,olderadult	phase3	0.863281
https://pubmed.ncbi.nlm.nih.gov/33495229	2021	sustained	spf	goldensyrian	m	39		hamster		challenge+clindamycin	survival	t	t	87	vpi10463	1000000	cfu		1	5	1	mg/kg	qd	5	vancomycin	0.5	sustained	500	5000	125	mg	qid	10	antibiotic	vancomycin	no	therapeutic	all	child,adult,olderadult	phase3	0.779279
https://pubmed.ncbi.nlm.nih.gov/33495229	2021	sustained	spf	goldensyrian	m	39		hamster		challenge+clindamycin	survival	t	t	87	vpi10463	1000000	cfu		1	5	1	mg/kg	qd	5	vancomycin	0.5	acute	500	5000	125	mg	qid	10	antibiotic	vancomycin	no	therapeutic	all	child,adult,olderadult	phase3	0.856678
https://pubmed.ncbi.nlm.nih.gov/33495229	2021	sustained	spf	goldensyrian	m	39		hamster		challenge+clindamycin	survival	t	t	87	vpi10463	1000000	cfu		1	5	1	mg/kg	qd	5	vancomycin	0.5	sustained	500	5000	125	mg	qid	10	antibiotic	vancomycin	no	therapeutic	all	child,adult,olderadult	phase3	0.745247
https://pubmed.ncbi.nlm.nih.gov/33495229	2021	sustained	spf	goldensyrian	m	39		hamster		challenge+clindamycin	survival	t	t	87	vpi10463	1000000	cfu		1	5	1	mg/kg	qd	5	vancomycin	0.5	acute	500	5000	125	mg	qid	10	antibiotic	vancomycin	no	therapeutic	all	adult,olderadult	phase3	0.634783
https://pubmed.ncbi.nlm.nih.gov/33495229	2021	sustained	spf	goldensyrian	m	39		hamster		challenge+clindamycin	survival	t	t	87	vpi10463	1000000	cfu		1	5	1	mg/kg	qd	5	vancomycin	0.5	sustained	500	5000	125	mg	qid	10	antibiotic	vancomycin	no	therapeutic	all	adult,olderadult	phase3	0.863014
https://pubmed.ncbi.nlm.nih.gov/33495229	2021	sustained	spf	goldensyrian	m	39		hamster		challenge+clindamycin	survival	t	t	87	vpi10463	1000000	cfu		1	5	1	mg/kg	qd	5	vancomycin	0.5	acute	500	5000	125	mg	qid	10	antibiotic	vancomycin	no	therapeutic	all	adult,olderadult	phase3	0.808
https://pubmed.ncbi.nlm.nih.gov/33495229	2021	sustained	spf	goldensyrian	m	39		hamster		challenge+clindamycin	survival	t	t	87	vpi10463	1000000	cfu		1	5	1	mg/kg	qd	5	vancomycin	0.5	sustained	500	5000	125	mg	qid	10	antibiotic	vancomycin	no	therapeutic	all	adult,olderadult	phase3	0.823529
https://pubmed.ncbi.nlm.nih.gov/33495229	2021	sustained	spf	goldensyrian	m	39		hamster		challenge+clindamycin	survival	t	t	87	vpi10463	1000000	cfu		1	5	1	mg/kg	qd	5	vancomycin	0.5	acute	500	5000	125	mg	qid	10	antibiotic	vancomycin	no	therapeutic	all	adult,olderadult	phase3	0.80597
https://pubmed.ncbi.nlm.nih.gov/33495229	2021	sustained	spf	goldensyrian	m	39		hamster		challenge+clindamycin	survival	t	t	87	vpi10463	1000000	cfu		1	5	1	mg/kg	qd	5	vancomycin	0.5	sustained	500	5000	125	mg	qid	10	antibiotic	vancomycin	no	therapeutic	all	adult,olderadult	phase3	0.757009
https://pubmed.ncbi.nlm.nih.gov/33495229	2021	sustained	spf	goldensyrian	m	39		hamster		challenge+clindamycin	survival	t	t	87	vpi10463	1000000	cfu		1	5	1	mg/kg	qd	5	vancomycin	0.5	acute	500	5000	125	mg	qid	10	antibiotic	vancomycin	no	therapeutic	all	adult,olderadult	phase2	0.69697
https://pubmed.ncbi.nlm.nih.gov/33495229	2021	sustained	spf	goldensyrian	m	39		hamster		challenge+clindamycin	survival	t	t	87	vpi10463	1000000	cfu		1	5	1	mg/kg	qd	5	vancomycin	0.5	sustained	500	5000	125	mg	qid	10	antibiotic	vancomycin	no	therapeutic	all	adult,olderadult	phase2	0.608696
https://pubmed.ncbi.nlm.nih.gov/33495229	2021	sustained	spf	goldensyrian	m	39		hamster		challenge+clindamycin	survival	t	t	87	vpi10463	1000000	cfu		1	5	1	mg/kg	qd	5	vancomycin	0.5	acute	500	5000	125	mg	qid	10	antibiotic	vancomycin	no	therapeutic	all	adult,olderadult	phase4	0.666667
https://pubmed.ncbi.nlm.nih.gov/33495229	2021	sustained	spf	goldensyrian	m	39		hamster		challenge+clindamycin	survival	t	t	87	vpi10463	1000000	cfu		1	5	1	mg/kg	qd	5	vancomycin	0.5	acute	500	5000	125	mg	qid	10	antibiotic	vancomycin	no	therapeutic	all	adult,olderadult	phase4	1
https://pubmed.ncbi.nlm.nih.gov/33495229	2021	sustained	spf	goldensyrian	m	39		hamster		challenge+clindamycin	survival	t	t	87	vpi10463	1000000	cfu		1	5	1	mg/kg	qd	5	vancomycin	0.5	sustained							control	vancomycin	no	therapeutic	all	adult,olderadult	phase3	0.740741
https://pubmed.ncbi.nlm.nih.gov/33495229	2021	sustained	spf	goldensyrian	m	39		hamster		challenge+clindamycin	survival	t	t	87	vpi10463	1000000	cfu		1	5	1	mg/kg	qd	5	vancomycin	0.5	sustained							antibiotic	vancomycin	no	therapeutic	all	adult,olderadult	phase3	0.721519
https://pubmed.ncbi.nlm.nih.gov/33495229	2021	sustained	spf	goldensyrian	m	39		hamster		challenge+clindamycin	survival	t	t	87	vpi10463	1000000	cfu		1	5	1	mg/kg	qd	5	vancomycin	0.5	sustained							antibiotic	vancomycin	no	therapeutic	all	adult,olderadult	phase2	0.263158
https://pubmed.ncbi.nlm.nih.gov/33495229	2021	sustained	spf	goldensyrian	m	39		hamster		challenge+clindamycin	survival	t	t	87	vpi10463	1000000	cfu		1	5	1	mg/kg	qd	5	vancomycin	0.5	acute							antibiotic	vancomycin	no	therapeutic	all	adult,olderadult	phase2	0.306667
https://pubmed.ncbi.nlm.nih.gov/33495229	2021	sustained	spf	goldensyrian	m	39		hamster		challenge+clindamycin	survival	t	t	87	vpi10463	1000000	cfu		1	5	1	mg/kg	qd	5	vancomycin	0.5	sustained							antibiotic	vancomycin	no	therapeutic	all	adult,olderadult	phase2	0.306667
https://pubmed.ncbi.nlm.nih.gov/33495229	2021	sustained	spf	goldensyrian	m	39		hamster		challenge+clindamycin	survival	t	t	87	vpi10463	1000000	cfu		5	25	5	mg/kg	qd	5	vancomycin	0.9	acute	500	5000	125	mg	qid	10	antibiotic	vancomycin	yes	therapeutic	all	adult,olderadult	phase2	0.893939
https://pubmed.ncbi.nlm.nih.gov/33495229	2021	sustained	spf	goldensyrian	m	39		hamster		challenge+clindamycin	survival	t	t	87	vpi10463	1000000	cfu		5	25	5	mg/kg	qd	5	vancomycin	0.9	sustained	500	5000	125	mg	qid	10	antibiotic	vancomycin	yes	therapeutic	all	adult,olderadult	phase2	0.644068
https://pubmed.ncbi.nlm.nih.gov/33495229	2021	sustained	spf	goldensyrian	m	39		hamster		challenge+clindamycin	survival	t	t	87	vpi10463	1000000	cfu		5	25	5	mg/kg	qd	5	vancomycin	0.9	sustained	125		125	mg	qd		antibiotic	vancomycin	no	prophylactic	all	olderadult	phase4	1
https://pubmed.ncbi.nlm.nih.gov/33495229	2021	sustained	spf	goldensyrian	m	39		hamster		challenge+clindamycin	survival	t	t	87	vpi10463	1000000	cfu		5	25	5	mg/kg	qd	5	vancomycin	0.9	acute	500	5000	125	mg	qid	10	antibiotic	vancomycin	no	therapeutic	all	adult,olderadult	phase3	0.853821
https://pubmed.ncbi.nlm.nih.gov/33495229	2021	sustained	spf	goldensyrian	m	39		hamster		challenge+clindamycin	survival	t	t	87	vpi10463	1000000	cfu		5	25	5	mg/kg	qd	5	vancomycin	0.9	sustained	500	5000	125	mg	qid	10	antibiotic	vancomycin	no	therapeutic	all	adult,olderadult	phase3	0.61794
https://pubmed.ncbi.nlm.nih.gov/33495229	2021	sustained	spf	goldensyrian	m	39		hamster		challenge+clindamycin	survival	t	t	87	vpi10463	1000000	cfu		5	25	5	mg/kg	qd	5	vancomycin	0.9	acute	500	5000	125	mg	qid	10	antibiotic	vancomycin	no	therapeutic	all	adult,olderadult	phase3	0.849057
https://pubmed.ncbi.nlm.nih.gov/33495229	2021	sustained	spf	goldensyrian	m	39		hamster		challenge+clindamycin	survival	t	t	87	vpi10463	1000000	cfu		5	25	5	mg/kg	qd	5	vancomycin	0.9	sustained	500	5000	125	mg	qid	10	antibiotic	vancomycin	no	therapeutic	all	adult,olderadult	phase3	0.622642
https://pubmed.ncbi.nlm.nih.gov/33495229	2021	sustained	spf	goldensyrian	m	39		hamster		challenge+clindamycin	survival	t	t	87	vpi10463	1000000	cfu		5	25	5	mg/kg	qd	5	vancomycin	0.9	acute	500	5000	125	mg	qid	10	antibiotic	vancomycin	no	therapeutic	all	adult,olderadult	phase4	0.821229
https://pubmed.ncbi.nlm.nih.gov/33495229	2021	sustained	spf	goldensyrian	m	39		hamster		challenge+clindamycin	survival	t	t	87	vpi10463	1000000	cfu		5	25	5	mg/kg	qd	5	vancomycin	0.9	sustained	500	5000	125	mg	qid	10	antibiotic	vancomycin	no	therapeutic	all	adult,olderadult	phase4	0.592179
https://pubmed.ncbi.nlm.nih.gov/33495229	2021	sustained	spf	goldensyrian	m	39		hamster		challenge+clindamycin	survival	t	t	87	vpi10463	1000000	cfu		5	25	5	mg/kg	qd	5	vancomycin	0.9	acute	500	5000	125	mg	qid	10	antibiotic	vancomycin	no	therapeutic	all	adult,olderadult	phase3	0.835714
https://pubmed.ncbi.nlm.nih.gov/33495229	2021	sustained	spf	goldensyrian	m	39		hamster		challenge+clindamycin	survival	t	t	87	vpi10463	1000000	cfu		5	25	5	mg/kg	qd	5	vancomycin	0.9	sustained	500	5000	125	mg	qid	10	antibiotic	vancomycin	no	therapeutic	all	adult,olderadult	phase3	0.610714
https://pubmed.ncbi.nlm.nih.gov/33495229	2021	sustained	spf	goldensyrian	m	39		hamster		challenge+clindamycin	survival	t	t	87	vpi10463	1000000	cfu		5	25	5	mg/kg	qd	5	vancomycin	0.9	acute	500	5000	125	mg	qid	10	antibiotic	vancomycin	no	therapeutic	all	adult,olderadult	phase3	0.818493
https://pubmed.ncbi.nlm.nih.gov/33495229	2021	sustained	spf	goldensyrian	m	39		hamster		challenge+clindamycin	survival	t	t	87	vpi10463	1000000	cfu		5	25	5	mg/kg	qd	5	vancomycin	0.9	sustained	500	5000	125	mg	qid	10	antibiotic	vancomycin	no	therapeutic	all	adult,olderadult	phase3	0.589041
https://pubmed.ncbi.nlm.nih.gov/33495229	2021	sustained	spf	goldensyrian	m	39		hamster		challenge+clindamycin	survival	t	t	87	vpi10463	1000000	cfu		5	25	5	mg/kg	qd	5	vancomycin	0.9	acute	500	5000	125	mg	qid	10	antibiotic	vancomycin	no	therapeutic	all	adult,olderadult	phase3	0.87963
https://pubmed.ncbi.nlm.nih.gov/33495229	2021	sustained	spf	goldensyrian	m	39		hamster		challenge+clindamycin	survival	t	t	87	vpi10463	1000000	cfu		5	25	5	mg/kg	qd	5	vancomycin	0.9	sustained	500	5000	125	mg	qid	10	antibiotic	vancomycin	no	therapeutic	all	adult,olderadult	phase3	0.657407
https://pubmed.ncbi.nlm.nih.gov/33495229	2021	sustained	spf	goldensyrian	m	39		hamster		challenge+clindamycin	survival	t	t	87	vpi10463	1000000	cfu		5	25	5	mg/kg	qd	5	vancomycin	0.9	acute	500	5000	125	mg	qid	10	antibiotic	vancomycin	no	therapeutic	all	adult,olderadult	phase3	0.1875
https://pubmed.ncbi.nlm.nih.gov/33495229	2021	sustained	spf	goldensyrian	m	39		hamster		challenge+clindamycin	survival	t	t	87	vpi10463	1000000	cfu		5	25	5	mg/kg	qd	5	vancomycin	0.9	sustained	500	5000	125	mg	qid	10	antibiotic	vancomycin	no	therapeutic	all	adult,olderadult	phase3	0.3125
https://pubmed.ncbi.nlm.nih.gov/33495229	2021	sustained	spf	goldensyrian	m	39		hamster		challenge+clindamycin	survival	t	t	87	vpi10463	1000000	cfu		5	25	5	mg/kg	qd	5	vancomycin	0.9	acute	500	5000	125	mg	qid	10	antibiotic	vancomycin	yes	therapeutic	all	adult,olderadult	phase2	0.863636
https://pubmed.ncbi.nlm.nih.gov/33495229	2021	sustained	spf	goldensyrian	m	39		hamster		challenge+clindamycin	survival	t	t	87	vpi10463	1000000	cfu		5	25	5	mg/kg	qd	5	vancomycin	0.9	sustained	500	5000	125	mg	qid	10	antibiotic	vancomycin	yes	therapeutic	all	adult,olderadult	phase2	0.545455
https://pubmed.ncbi.nlm.nih.gov/33495229	2021	sustained	spf	goldensyrian	m	39		hamster		challenge+clindamycin	survival	t	t	87	vpi10463	1000000	cfu		5	25	5	mg/kg	qd	5	vancomycin	0.9	acute	500	5000	125	mg	qid	10	antibiotic	vancomycin	no	therapeutic	all	child	phase3	0.704545
https://pubmed.ncbi.nlm.nih.gov/33495229	2021	sustained	spf	goldensyrian	m	39		hamster		challenge+clindamycin	survival	t	t	87	vpi10463	1000000	cfu		5	25	5	mg/kg	qd	5	vancomycin	0.9	sustained	500	5000	125	mg	qid	10	antibiotic	vancomycin	no	therapeutic	all	child	phase3	0.741935
https://pubmed.ncbi.nlm.nih.gov/33495229	2021	sustained	spf	goldensyrian	m	39		hamster		challenge+clindamycin	survival	t	t	87	vpi10463	1000000	cfu		5	25	5	mg/kg	qd	5	vancomycin	0.9	acute	500	5000	125	mg	qid	10	antibiotic	vancomycin	no	therapeutic	all	child,adult,olderadult	phase3	0.863281
https://pubmed.ncbi.nlm.nih.gov/33495229	2021	sustained	spf	goldensyrian	m	39		hamster		challenge+clindamycin	survival	t	t	87	vpi10463	1000000	cfu		5	25	5	mg/kg	qd	5	vancomycin	0.9	sustained	500	5000	125	mg	qid	10	antibiotic	vancomycin	no	therapeutic	all	child,adult,olderadult	phase3	0.779279
https://pubmed.ncbi.nlm.nih.gov/33495229	2021	sustained	spf	goldensyrian	m	39		hamster		challenge+clindamycin	survival	t	t	87	vpi10463	1000000	cfu		5	25	5	mg/kg	qd	5	vancomycin	0.9	acute	500	5000	125	mg	qid	10	antibiotic	vancomycin	no	therapeutic	all	child,adult,olderadult	phase3	0.856678
https://pubmed.ncbi.nlm.nih.gov/33495229	2021	sustained	spf	goldensyrian	m	39		hamster		challenge+clindamycin	survival	t	t	87	vpi10463	1000000	cfu		5	25	5	mg/kg	qd	5	vancomycin	0.9	sustained	500	5000	125	mg	qid	10	antibiotic	vancomycin	no	therapeutic	all	child,adult,olderadult	phase3	0.745247
https://pubmed.ncbi.nlm.nih.gov/33495229	2021	sustained	spf	goldensyrian	m	39		hamster		challenge+clindamycin	survival	t	t	87	vpi10463	1000000	cfu		5	25	5	mg/kg	qd	5	vancomycin	0.9	acute	500	5000	125	mg	qid	10	antibiotic	vancomycin	no	therapeutic	all	adult,olderadult	phase3	0.634783
https://pubmed.ncbi.nlm.nih.gov/33495229	2021	sustained	spf	goldensyrian	m	39		hamster		challenge+clindamycin	survival	t	t	87	vpi10463	1000000	cfu		5	25	5	mg/kg	qd	5	vancomycin	0.9	sustained	500	5000	125	mg	qid	10	antibiotic	vancomycin	no	therapeutic	all	adult,olderadult	phase3	0.863014
https://pubmed.ncbi.nlm.nih.gov/33495229	2021	sustained	spf	goldensyrian	m	39		hamster		challenge+clindamycin	survival	t	t	87	vpi10463	1000000	cfu		5	25	5	mg/kg	qd	5	vancomycin	0.9	acute	500	5000	125	mg	qid	10	antibiotic	vancomycin	no	therapeutic	all	adult,olderadult	phase3	0.808
https://pubmed.ncbi.nlm.nih.gov/33495229	2021	sustained	spf	goldensyrian	m	39		hamster		challenge+clindamycin	survival	t	t	87	vpi10463	1000000	cfu		5	25	5	mg/kg	qd	5	vancomycin	0.9	sustained	500	5000	125	mg	qid	10	antibiotic	vancomycin	no	therapeutic	all	adult,olderadult	phase3	0.823529
https://pubmed.ncbi.nlm.nih.gov/33495229	2021	sustained	spf	goldensyrian	m	39		hamster		challenge+clindamycin	survival	t	t	87	vpi10463	1000000	cfu		5	25	5	mg/kg	qd	5	vancomycin	0.9	acute	500	5000	125	mg	qid	10	antibiotic	vancomycin	no	therapeutic	all	adult,olderadult	phase3	0.80597
https://pubmed.ncbi.nlm.nih.gov/33495229	2021	sustained	spf	goldensyrian	m	39		hamster		challenge+clindamycin	survival	t	t	87	vpi10463	1000000	cfu		5	25	5	mg/kg	qd	5	vancomycin	0.9	sustained	500	5000	125	mg	qid	10	antibiotic	vancomycin	no	therapeutic	all	adult,olderadult	phase3	0.757009
https://pubmed.ncbi.nlm.nih.gov/33495229	2021	sustained	spf	goldensyrian	m	39		hamster		challenge+clindamycin	survival	t	t	87	vpi10463	1000000	cfu		5	25	5	mg/kg	qd	5	vancomycin	0.9	acute	500	5000	125	mg	qid	10	antibiotic	vancomycin	no	therapeutic	all	adult,olderadult	phase2	0.69697
https://pubmed.ncbi.nlm.nih.gov/33495229	2021	sustained	spf	goldensyrian	m	39		hamster		challenge+clindamycin	survival	t	t	87	vpi10463	1000000	cfu		5	25	5	mg/kg	qd	5	vancomycin	0.9	sustained	500	5000	125	mg	qid	10	antibiotic	vancomycin	no	therapeutic	all	adult,olderadult	phase2	0.608696
https://pubmed.ncbi.nlm.nih.gov/33495229	2021	sustained	spf	goldensyrian	m	39		hamster		challenge+clindamycin	survival	t	t	87	vpi10463	1000000	cfu		5	25	5	mg/kg	qd	5	vancomycin	0.9	acute	500	5000	125	mg	qid	10	antibiotic	vancomycin	no	therapeutic	all	adult,olderadult	phase4	0.666667
https://pubmed.ncbi.nlm.nih.gov/33495229	2021	sustained	spf	goldensyrian	m	39		hamster		challenge+clindamycin	survival	t	t	87	vpi10463	1000000	cfu		5	25	5	mg/kg	qd	5	vancomycin	0.9	acute	500	5000	125	mg	qid	10	antibiotic	vancomycin	no	therapeutic	all	adult,olderadult	phase4	1
https://pubmed.ncbi.nlm.nih.gov/33495229	2021	sustained	spf	goldensyrian	m	39		hamster		challenge+clindamycin	survival	t	t	87	vpi10463	1000000	cfu		5	25	5	mg/kg	qd	5	vancomycin	0.9	sustained							control	vancomycin	no	therapeutic	all	adult,olderadult	phase3	0.740741
https://pubmed.ncbi.nlm.nih.gov/33495229	2021	sustained	spf	goldensyrian	m	39		hamster		challenge+clindamycin	survival	t	t	87	vpi10463	1000000	cfu		5	25	5	mg/kg	qd	5	vancomycin	0.9	sustained							antibiotic	vancomycin	no	therapeutic	all	adult,olderadult	phase3	0.721519
https://pubmed.ncbi.nlm.nih.gov/33495229	2021	sustained	spf	goldensyrian	m	39		hamster		challenge+clindamycin	survival	t	t	87	vpi10463	1000000	cfu		5	25	5	mg/kg	qd	5	vancomycin	0.9	sustained							antibiotic	vancomycin	no	therapeutic	all	adult,olderadult	phase2	0.263158
https://pubmed.ncbi.nlm.nih.gov/33495229	2021	sustained	spf	goldensyrian	m	39		hamster		challenge+clindamycin	survival	t	t	87	vpi10463	1000000	cfu		5	25	5	mg/kg	qd	5	vancomycin	0.9	acute							antibiotic	vancomycin	no	therapeutic	all	adult,olderadult	phase2	0.306667
https://pubmed.ncbi.nlm.nih.gov/33495229	2021	sustained	spf	goldensyrian	m	39		hamster		challenge+clindamycin	survival	t	t	87	vpi10463	1000000	cfu		5	25	5	mg/kg	qd	5	vancomycin	0.9	sustained							antibiotic	vancomycin	no	therapeutic	all	adult,olderadult	phase2	0.306667
https://pubmed.ncbi.nlm.nih.gov/25824219	2015	acute	spf	c57bl/6	m	39		mouse		kanamycin,gentamicin,colistin,metronidazole,vancomycin+clindamycin+challenge	cumulativemortality	f	t	87	vpi10463	10000	cfu		50	250	50	mg/kg	qd	5	vancomycin	0.9	acute	500	5000	125	mg	qid	10	antibiotic	vancomycin	yes	therapeutic	all	adult,olderadult	phase2	0.893939
https://pubmed.ncbi.nlm.nih.gov/25824219	2015	acute	spf	c57bl/6	m	39		mouse		kanamycin,gentamicin,colistin,metronidazole,vancomycin+clindamycin+challenge	cumulativemortality	f	t	87	vpi10463	10000	cfu		50	250	50	mg/kg	qd	5	vancomycin	0.9	sustained	500	5000	125	mg	qid	10	antibiotic	vancomycin	yes	therapeutic	all	adult,olderadult	phase2	0.644068
https://pubmed.ncbi.nlm.nih.gov/25824219	2015	acute	spf	c57bl/6	m	39		mouse		kanamycin,gentamicin,colistin,metronidazole,vancomycin+clindamycin+challenge	cumulativemortality	f	t	87	vpi10463	10000	cfu		50	250	50	mg/kg	qd	5	vancomycin	0.9	sustained	125		125	mg	qd		antibiotic	vancomycin	no	prophylactic	all	olderadult	phase4	1
https://pubmed.ncbi.nlm.nih.gov/25824219	2015	acute	spf	c57bl/6	m	39		mouse		kanamycin,gentamicin,colistin,metronidazole,vancomycin+clindamycin+challenge	cumulativemortality	f	t	87	vpi10463	10000	cfu		50	250	50	mg/kg	qd	5	vancomycin	0.9	acute	500	5000	125	mg	qid	10	antibiotic	vancomycin	no	therapeutic	all	adult,olderadult	phase3	0.853821
https://pubmed.ncbi.nlm.nih.gov/25824219	2015	acute	spf	c57bl/6	m	39		mouse		kanamycin,gentamicin,colistin,metronidazole,vancomycin+clindamycin+challenge	cumulativemortality	f	t	87	vpi10463	10000	cfu		50	250	50	mg/kg	qd	5	vancomycin	0.9	sustained	500	5000	125	mg	qid	10	antibiotic	vancomycin	no	therapeutic	all	adult,olderadult	phase3	0.61794
https://pubmed.ncbi.nlm.nih.gov/25824219	2015	acute	spf	c57bl/6	m	39		mouse		kanamycin,gentamicin,colistin,metronidazole,vancomycin+clindamycin+challenge	cumulativemortality	f	t	87	vpi10463	10000	cfu		50	250	50	mg/kg	qd	5	vancomycin	0.9	acute	500	5000	125	mg	qid	10	antibiotic	vancomycin	no	therapeutic	all	adult,olderadult	phase3	0.849057
https://pubmed.ncbi.nlm.nih.gov/25824219	2015	acute	spf	c57bl/6	m	39		mouse		kanamycin,gentamicin,colistin,metronidazole,vancomycin+clindamycin+challenge	cumulativemortality	f	t	87	vpi10463	10000	cfu		50	250	50	mg/kg	qd	5	vancomycin	0.9	sustained	500	5000	125	mg	qid	10	antibiotic	vancomycin	no	therapeutic	all	adult,olderadult	phase3	0.622642
https://pubmed.ncbi.nlm.nih.gov/25824219	2015	acute	spf	c57bl/6	m	39		mouse		kanamycin,gentamicin,colistin,metronidazole,vancomycin+clindamycin+challenge	cumulativemortality	f	t	87	vpi10463	10000	cfu		50	250	50	mg/kg	qd	5	vancomycin	0.9	acute	500	5000	125	mg	qid	10	antibiotic	vancomycin	no	therapeutic	all	adult,olderadult	phase4	0.821229
https://pubmed.ncbi.nlm.nih.gov/25824219	2015	acute	spf	c57bl/6	m	39		mouse		kanamycin,gentamicin,colistin,metronidazole,vancomycin+clindamycin+challenge	cumulativemortality	f	t	87	vpi10463	10000	cfu		50	250	50	mg/kg	qd	5	vancomycin	0.9	sustained	500	5000	125	mg	qid	10	antibiotic	vancomycin	no	therapeutic	all	adult,olderadult	phase4	0.592179
https://pubmed.ncbi.nlm.nih.gov/25824219	2015	acute	spf	c57bl/6	m	39		mouse		kanamycin,gentamicin,colistin,metronidazole,vancomycin+clindamycin+challenge	cumulativemortality	f	t	87	vpi10463	10000	cfu		50	250	50	mg/kg	qd	5	vancomycin	0.9	acute	500	5000	125	mg	qid	10	antibiotic	vancomycin	no	therapeutic	all	adult,olderadult	phase3	0.835714
https://pubmed.ncbi.nlm.nih.gov/25824219	2015	acute	spf	c57bl/6	m	39		mouse		kanamycin,gentamicin,colistin,metronidazole,vancomycin+clindamycin+challenge	cumulativemortality	f	t	87	vpi10463	10000	cfu		50	250	50	mg/kg	qd	5	vancomycin	0.9	sustained	500	5000	125	mg	qid	10	antibiotic	vancomycin	no	therapeutic	all	adult,olderadult	phase3	0.610714
https://pubmed.ncbi.nlm.nih.gov/25824219	2015	acute	spf	c57bl/6	m	39		mouse		kanamycin,gentamicin,colistin,metronidazole,vancomycin+clindamycin+challenge	cumulativemortality	f	t	87	vpi10463	10000	cfu		50	250	50	mg/kg	qd	5	vancomycin	0.9	acute	500	5000	125	mg	qid	10	antibiotic	vancomycin	no	therapeutic	all	adult,olderadult	phase3	0.818493
https://pubmed.ncbi.nlm.nih.gov/25824219	2015	acute	spf	c57bl/6	m	39		mouse		kanamycin,gentamicin,colistin,metronidazole,vancomycin+clindamycin+challenge	cumulativemortality	f	t	87	vpi10463	10000	cfu		50	250	50	mg/kg	qd	5	vancomycin	0.9	sustained	500	5000	125	mg	qid	10	antibiotic	vancomycin	no	therapeutic	all	adult,olderadult	phase3	0.589041
https://pubmed.ncbi.nlm.nih.gov/25824219	2015	acute	spf	c57bl/6	m	39		mouse		kanamycin,gentamicin,colistin,metronidazole,vancomycin+clindamycin+challenge	cumulativemortality	f	t	87	vpi10463	10000	cfu		50	250	50	mg/kg	qd	5	vancomycin	0.9	acute	500	5000	125	mg	qid	10	antibiotic	vancomycin	no	therapeutic	all	adult,olderadult	phase3	0.87963
https://pubmed.ncbi.nlm.nih.gov/25824219	2015	acute	spf	c57bl/6	m	39		mouse		kanamycin,gentamicin,colistin,metronidazole,vancomycin+clindamycin+challenge	cumulativemortality	f	t	87	vpi10463	10000	cfu		50	250	50	mg/kg	qd	5	vancomycin	0.9	sustained	500	5000	125	mg	qid	10	antibiotic	vancomycin	no	therapeutic	all	adult,olderadult	phase3	0.657407
https://pubmed.ncbi.nlm.nih.gov/25824219	2015	acute	spf	c57bl/6	m	39		mouse		kanamycin,gentamicin,colistin,metronidazole,vancomycin+clindamycin+challenge	cumulativemortality	f	t	87	vpi10463	10000	cfu		50	250	50	mg/kg	qd	5	vancomycin	0.9	acute	500	5000	125	mg	qid	10	antibiotic	vancomycin	no	therapeutic	all	adult,olderadult	phase3	0.1875
https://pubmed.ncbi.nlm.nih.gov/25824219	2015	acute	spf	c57bl/6	m	39		mouse		kanamycin,gentamicin,colistin,metronidazole,vancomycin+clindamycin+challenge	cumulativemortality	f	t	87	vpi10463	10000	cfu		50	250	50	mg/kg	qd	5	vancomycin	0.9	sustained	500	5000	125	mg	qid	10	antibiotic	vancomycin	no	therapeutic	all	adult,olderadult	phase3	0.3125
https://pubmed.ncbi.nlm.nih.gov/25824219	2015	acute	spf	c57bl/6	m	39		mouse		kanamycin,gentamicin,colistin,metronidazole,vancomycin+clindamycin+challenge	cumulativemortality	f	t	87	vpi10463	10000	cfu		50	250	50	mg/kg	qd	5	vancomycin	0.9	acute	500	5000	125	mg	qid	10	antibiotic	vancomycin	yes	therapeutic	all	adult,olderadult	phase2	0.863636
https://pubmed.ncbi.nlm.nih.gov/25824219	2015	acute	spf	c57bl/6	m	39		mouse		kanamycin,gentamicin,colistin,metronidazole,vancomycin+clindamycin+challenge	cumulativemortality	f	t	87	vpi10463	10000	cfu		50	250	50	mg/kg	qd	5	vancomycin	0.9	sustained	500	5000	125	mg	qid	10	antibiotic	vancomycin	yes	therapeutic	all	adult,olderadult	phase2	0.545455
https://pubmed.ncbi.nlm.nih.gov/25824219	2015	acute	spf	c57bl/6	m	39		mouse		kanamycin,gentamicin,colistin,metronidazole,vancomycin+clindamycin+challenge	cumulativemortality	f	t	87	vpi10463	10000	cfu		50	250	50	mg/kg	qd	5	vancomycin	0.9	acute	500	5000	125	mg	qid	10	antibiotic	vancomycin	no	therapeutic	all	child	phase3	0.704545
https://pubmed.ncbi.nlm.nih.gov/25824219	2015	acute	spf	c57bl/6	m	39		mouse		kanamycin,gentamicin,colistin,metronidazole,vancomycin+clindamycin+challenge	cumulativemortality	f	t	87	vpi10463	10000	cfu		50	250	50	mg/kg	qd	5	vancomycin	0.9	sustained	500	5000	125	mg	qid	10	antibiotic	vancomycin	no	therapeutic	all	child	phase3	0.741935
https://pubmed.ncbi.nlm.nih.gov/25824219	2015	acute	spf	c57bl/6	m	39		mouse		kanamycin,gentamicin,colistin,metronidazole,vancomycin+clindamycin+challenge	cumulativemortality	f	t	87	vpi10463	10000	cfu		50	250	50	mg/kg	qd	5	vancomycin	0.9	acute	500	5000	125	mg	qid	10	antibiotic	vancomycin	no	therapeutic	all	child,adult,olderadult	phase3	0.863281
https://pubmed.ncbi.nlm.nih.gov/25824219	2015	acute	spf	c57bl/6	m	39		mouse		kanamycin,gentamicin,colistin,metronidazole,vancomycin+clindamycin+challenge	cumulativemortality	f	t	87	vpi10463	10000	cfu		50	250	50	mg/kg	qd	5	vancomycin	0.9	sustained	500	5000	125	mg	qid	10	antibiotic	vancomycin	no	therapeutic	all	child,adult,olderadult	phase3	0.779279
https://pubmed.ncbi.nlm.nih.gov/25824219	2015	acute	spf	c57bl/6	m	39		mouse		kanamycin,gentamicin,colistin,metronidazole,vancomycin+clindamycin+challenge	cumulativemortality	f	t	87	vpi10463	10000	cfu		50	250	50	mg/kg	qd	5	vancomycin	0.9	acute	500	5000	125	mg	qid	10	antibiotic	vancomycin	no	therapeutic	all	child,adult,olderadult	phase3	0.856678
https://pubmed.ncbi.nlm.nih.gov/25824219	2015	acute	spf	c57bl/6	m	39		mouse		kanamycin,gentamicin,colistin,metronidazole,vancomycin+clindamycin+challenge	cumulativemortality	f	t	87	vpi10463	10000	cfu		50	250	50	mg/kg	qd	5	vancomycin	0.9	sustained	500	5000	125	mg	qid	10	antibiotic	vancomycin	no	therapeutic	all	child,adult,olderadult	phase3	0.745247
https://pubmed.ncbi.nlm.nih.gov/25824219	2015	acute	spf	c57bl/6	m	39		mouse		kanamycin,gentamicin,colistin,metronidazole,vancomycin+clindamycin+challenge	cumulativemortality	f	t	87	vpi10463	10000	cfu		50	250	50	mg/kg	qd	5	vancomycin	0.9	acute	500	5000	125	mg	qid	10	antibiotic	vancomycin	no	therapeutic	all	adult,olderadult	phase3	0.634783
https://pubmed.ncbi.nlm.nih.gov/25824219	2015	acute	spf	c57bl/6	m	39		mouse		kanamycin,gentamicin,colistin,metronidazole,vancomycin+clindamycin+challenge	cumulativemortality	f	t	87	vpi10463	10000	cfu		50	250	50	mg/kg	qd	5	vancomycin	0.9	sustained	500	5000	125	mg	qid	10	antibiotic	vancomycin	no	therapeutic	all	adult,olderadult	phase3	0.863014
https://pubmed.ncbi.nlm.nih.gov/25824219	2015	acute	spf	c57bl/6	m	39		mouse		kanamycin,gentamicin,colistin,metronidazole,vancomycin+clindamycin+challenge	cumulativemortality	f	t	87	vpi10463	10000	cfu		50	250	50	mg/kg	qd	5	vancomycin	0.9	acute	500	5000	125	mg	qid	10	antibiotic	vancomycin	no	therapeutic	all	adult,olderadult	phase3	0.808
https://pubmed.ncbi.nlm.nih.gov/25824219	2015	acute	spf	c57bl/6	m	39		mouse		kanamycin,gentamicin,colistin,metronidazole,vancomycin+clindamycin+challenge	cumulativemortality	f	t	87	vpi10463	10000	cfu		50	250	50	mg/kg	qd	5	vancomycin	0.9	sustained	500	5000	125	mg	qid	10	antibiotic	vancomycin	no	therapeutic	all	adult,olderadult	phase3	0.823529
https://pubmed.ncbi.nlm.nih.gov/25824219	2015	acute	spf	c57bl/6	m	39		mouse		kanamycin,gentamicin,colistin,metronidazole,vancomycin+clindamycin+challenge	cumulativemortality	f	t	87	vpi10463	10000	cfu		50	250	50	mg/kg	qd	5	vancomycin	0.9	acute	500	5000	125	mg	qid	10	antibiotic	vancomycin	no	therapeutic	all	adult,olderadult	phase3	0.80597
https://pubmed.ncbi.nlm.nih.gov/25824219	2015	acute	spf	c57bl/6	m	39		mouse		kanamycin,gentamicin,colistin,metronidazole,vancomycin+clindamycin+challenge	cumulativemortality	f	t	87	vpi10463	10000	cfu		50	250	50	mg/kg	qd	5	vancomycin	0.9	sustained	500	5000	125	mg	qid	10	antibiotic	vancomycin	no	therapeutic	all	adult,olderadult	phase3	0.757009
https://pubmed.ncbi.nlm.nih.gov/25824219	2015	acute	spf	c57bl/6	m	39		mouse		kanamycin,gentamicin,colistin,metronidazole,vancomycin+clindamycin+challenge	cumulativemortality	f	t	87	vpi10463	10000	cfu		50	250	50	mg/kg	qd	5	vancomycin	0.9	acute	500	5000	125	mg	qid	10	antibiotic	vancomycin	no	therapeutic	all	adult,olderadult	phase2	0.69697
https://pubmed.ncbi.nlm.nih.gov/25824219	2015	acute	spf	c57bl/6	m	39		mouse		kanamycin,gentamicin,colistin,metronidazole,vancomycin+clindamycin+challenge	cumulativemortality	f	t	87	vpi10463	10000	cfu		50	250	50	mg/kg	qd	5	vancomycin	0.9	sustained	500	5000	125	mg	qid	10	antibiotic	vancomycin	no	therapeutic	all	adult,olderadult	phase2	0.608696
https://pubmed.ncbi.nlm.nih.gov/25824219	2015	acute	spf	c57bl/6	m	39		mouse		kanamycin,gentamicin,colistin,metronidazole,vancomycin+clindamycin+challenge	cumulativemortality	f	t	87	vpi10463	10000	cfu		50	250	50	mg/kg	qd	5	vancomycin	0.9	acute	500	5000	125	mg	qid	10	antibiotic	vancomycin	no	therapeutic	all	adult,olderadult	phase4	0.666667
https://pubmed.ncbi.nlm.nih.gov/25824219	2015	acute	spf	c57bl/6	m	39		mouse		kanamycin,gentamicin,colistin,metronidazole,vancomycin+clindamycin+challenge	cumulativemortality	f	t	87	vpi10463	10000	cfu		50	250	50	mg/kg	qd	5	vancomycin	0.9	acute	500	5000	125	mg	qid	10	antibiotic	vancomycin	no	therapeutic	all	adult,olderadult	phase4	1
https://pubmed.ncbi.nlm.nih.gov/25824219	2015	acute	spf	c57bl/6	m	39		mouse		kanamycin,gentamicin,colistin,metronidazole,vancomycin+clindamycin+challenge	cumulativemortality	f	t	87	vpi10463	10000	cfu		50	250	50	mg/kg	qd	5	vancomycin	0.9	sustained							control	vancomycin	no	therapeutic	all	adult,olderadult	phase3	0.740741
https://pubmed.ncbi.nlm.nih.gov/25824219	2015	acute	spf	c57bl/6	m	39		mouse		kanamycin,gentamicin,colistin,metronidazole,vancomycin+clindamycin+challenge	cumulativemortality	f	t	87	vpi10463	10000	cfu		50	250	50	mg/kg	qd	5	vancomycin	0.9	sustained							antibiotic	vancomycin	no	therapeutic	all	adult,olderadult	phase3	0.721519
https://pubmed.ncbi.nlm.nih.gov/25824219	2015	acute	spf	c57bl/6	m	39		mouse		kanamycin,gentamicin,colistin,metronidazole,vancomycin+clindamycin+challenge	cumulativemortality	f	t	87	vpi10463	10000	cfu		50	250	50	mg/kg	qd	5	vancomycin	0.9	sustained							antibiotic	vancomycin	no	therapeutic	all	adult,olderadult	phase2	0.263158
https://pubmed.ncbi.nlm.nih.gov/25824219	2015	acute	spf	c57bl/6	m	39		mouse		kanamycin,gentamicin,colistin,metronidazole,vancomycin+clindamycin+challenge	cumulativemortality	f	t	87	vpi10463	10000	cfu		50	250	50	mg/kg	qd	5	vancomycin	0.9	acute							antibiotic	vancomycin	no	therapeutic	all	adult,olderadult	phase2	0.306667
https://pubmed.ncbi.nlm.nih.gov/25824219	2015	acute	spf	c57bl/6	m	39		mouse		kanamycin,gentamicin,colistin,metronidazole,vancomycin+clindamycin+challenge	cumulativemortality	f	t	87	vpi10463	10000	cfu		50	250	50	mg/kg	qd	5	vancomycin	0.9	sustained							antibiotic	vancomycin	no	therapeutic	all	adult,olderadult	phase2	0.306667
https://pubmed.ncbi.nlm.nih.gov/25824219	2015	sustained	spf	c57bl/6	m	39		mouse		kanamycin,gentamicin,colistin,metronidazole,vancomycin+clindamycin+challenge	cumulativemortality	f	t	87	vpi10463	10000	cfu		50	250	50	mg/kg	qd	5	vancomycin	0.3	acute	500	5000	125	mg	qid	10	antibiotic	vancomycin	yes	therapeutic	all	adult,olderadult	phase2	0.893939
https://pubmed.ncbi.nlm.nih.gov/25824219	2015	sustained	spf	c57bl/6	m	39		mouse		kanamycin,gentamicin,colistin,metronidazole,vancomycin+clindamycin+challenge	cumulativemortality	f	t	87	vpi10463	10000	cfu		50	250	50	mg/kg	qd	5	vancomycin	0.3	sustained	500	5000	125	mg	qid	10	antibiotic	vancomycin	yes	therapeutic	all	adult,olderadult	phase2	0.644068
https://pubmed.ncbi.nlm.nih.gov/25824219	2015	sustained	spf	c57bl/6	m	39		mouse		kanamycin,gentamicin,colistin,metronidazole,vancomycin+clindamycin+challenge	cumulativemortality	f	t	87	vpi10463	10000	cfu		50	250	50	mg/kg	qd	5	vancomycin	0.3	sustained	125		125	mg	qd		antibiotic	vancomycin	no	prophylactic	all	olderadult	phase4	1
https://pubmed.ncbi.nlm.nih.gov/25824219	2015	sustained	spf	c57bl/6	m	39		mouse		kanamycin,gentamicin,colistin,metronidazole,vancomycin+clindamycin+challenge	cumulativemortality	f	t	87	vpi10463	10000	cfu		50	250	50	mg/kg	qd	5	vancomycin	0.3	acute	500	5000	125	mg	qid	10	antibiotic	vancomycin	no	therapeutic	all	adult,olderadult	phase3	0.853821
https://pubmed.ncbi.nlm.nih.gov/25824219	2015	sustained	spf	c57bl/6	m	39		mouse		kanamycin,gentamicin,colistin,metronidazole,vancomycin+clindamycin+challenge	cumulativemortality	f	t	87	vpi10463	10000	cfu		50	250	50	mg/kg	qd	5	vancomycin	0.3	sustained	500	5000	125	mg	qid	10	antibiotic	vancomycin	no	therapeutic	all	adult,olderadult	phase3	0.61794
https://pubmed.ncbi.nlm.nih.gov/25824219	2015	sustained	spf	c57bl/6	m	39		mouse		kanamycin,gentamicin,colistin,metronidazole,vancomycin+clindamycin+challenge	cumulativemortality	f	t	87	vpi10463	10000	cfu		50	250	50	mg/kg	qd	5	vancomycin	0.3	acute	500	5000	125	mg	qid	10	antibiotic	vancomycin	no	therapeutic	all	adult,olderadult	phase3	0.849057
https://pubmed.ncbi.nlm.nih.gov/25824219	2015	sustained	spf	c57bl/6	m	39		mouse		kanamycin,gentamicin,colistin,metronidazole,vancomycin+clindamycin+challenge	cumulativemortality	f	t	87	vpi10463	10000	cfu		50	250	50	mg/kg	qd	5	vancomycin	0.3	sustained	500	5000	125	mg	qid	10	antibiotic	vancomycin	no	therapeutic	all	adult,olderadult	phase3	0.622642
https://pubmed.ncbi.nlm.nih.gov/25824219	2015	sustained	spf	c57bl/6	m	39		mouse		kanamycin,gentamicin,colistin,metronidazole,vancomycin+clindamycin+challenge	cumulativemortality	f	t	87	vpi10463	10000	cfu		50	250	50	mg/kg	qd	5	vancomycin	0.3	acute	500	5000	125	mg	qid	10	antibiotic	vancomycin	no	therapeutic	all	adult,olderadult	phase4	0.821229
https://pubmed.ncbi.nlm.nih.gov/25824219	2015	sustained	spf	c57bl/6	m	39		mouse		kanamycin,gentamicin,colistin,metronidazole,vancomycin+clindamycin+challenge	cumulativemortality	f	t	87	vpi10463	10000	cfu		50	250	50	mg/kg	qd	5	vancomycin	0.3	sustained	500	5000	125	mg	qid	10	antibiotic	vancomycin	no	therapeutic	all	adult,olderadult	phase4	0.592179
https://pubmed.ncbi.nlm.nih.gov/25824219	2015	sustained	spf	c57bl/6	m	39		mouse		kanamycin,gentamicin,colistin,metronidazole,vancomycin+clindamycin+challenge	cumulativemortality	f	t	87	vpi10463	10000	cfu		50	250	50	mg/kg	qd	5	vancomycin	0.3	acute	500	5000	125	mg	qid	10	antibiotic	vancomycin	no	therapeutic	all	adult,olderadult	phase3	0.835714
https://pubmed.ncbi.nlm.nih.gov/25824219	2015	sustained	spf	c57bl/6	m	39		mouse		kanamycin,gentamicin,colistin,metronidazole,vancomycin+clindamycin+challenge	cumulativemortality	f	t	87	vpi10463	10000	cfu		50	250	50	mg/kg	qd	5	vancomycin	0.3	sustained	500	5000	125	mg	qid	10	antibiotic	vancomycin	no	therapeutic	all	adult,olderadult	phase3	0.610714
https://pubmed.ncbi.nlm.nih.gov/25824219	2015	sustained	spf	c57bl/6	m	39		mouse		kanamycin,gentamicin,colistin,metronidazole,vancomycin+clindamycin+challenge	cumulativemortality	f	t	87	vpi10463	10000	cfu		50	250	50	mg/kg	qd	5	vancomycin	0.3	acute	500	5000	125	mg	qid	10	antibiotic	vancomycin	no	therapeutic	all	adult,olderadult	phase3	0.818493
https://pubmed.ncbi.nlm.nih.gov/25824219	2015	sustained	spf	c57bl/6	m	39		mouse		kanamycin,gentamicin,colistin,metronidazole,vancomycin+clindamycin+challenge	cumulativemortality	f	t	87	vpi10463	10000	cfu		50	250	50	mg/kg	qd	5	vancomycin	0.3	sustained	500	5000	125	mg	qid	10	antibiotic	vancomycin	no	therapeutic	all	adult,olderadult	phase3	0.589041
https://pubmed.ncbi.nlm.nih.gov/25824219	2015	sustained	spf	c57bl/6	m	39		mouse		kanamycin,gentamicin,colistin,metronidazole,vancomycin+clindamycin+challenge	cumulativemortality	f	t	87	vpi10463	10000	cfu		50	250	50	mg/kg	qd	5	vancomycin	0.3	acute	500	5000	125	mg	qid	10	antibiotic	vancomycin	no	therapeutic	all	adult,olderadult	phase3	0.87963
https://pubmed.ncbi.nlm.nih.gov/25824219	2015	sustained	spf	c57bl/6	m	39		mouse		kanamycin,gentamicin,colistin,metronidazole,vancomycin+clindamycin+challenge	cumulativemortality	f	t	87	vpi10463	10000	cfu		50	250	50	mg/kg	qd	5	vancomycin	0.3	sustained	500	5000	125	mg	qid	10	antibiotic	vancomycin	no	therapeutic	all	adult,olderadult	phase3	0.657407
https://pubmed.ncbi.nlm.nih.gov/25824219	2015	sustained	spf	c57bl/6	m	39		mouse		kanamycin,gentamicin,colistin,metronidazole,vancomycin+clindamycin+challenge	cumulativemortality	f	t	87	vpi10463	10000	cfu		50	250	50	mg/kg	qd	5	vancomycin	0.3	acute	500	5000	125	mg	qid	10	antibiotic	vancomycin	no	therapeutic	all	adult,olderadult	phase3	0.1875
https://pubmed.ncbi.nlm.nih.gov/25824219	2015	sustained	spf	c57bl/6	m	39		mouse		kanamycin,gentamicin,colistin,metronidazole,vancomycin+clindamycin+challenge	cumulativemortality	f	t	87	vpi10463	10000	cfu		50	250	50	mg/kg	qd	5	vancomycin	0.3	sustained	500	5000	125	mg	qid	10	antibiotic	vancomycin	no	therapeutic	all	adult,olderadult	phase3	0.3125
https://pubmed.ncbi.nlm.nih.gov/25824219	2015	sustained	spf	c57bl/6	m	39		mouse		kanamycin,gentamicin,colistin,metronidazole,vancomycin+clindamycin+challenge	cumulativemortality	f	t	87	vpi10463	10000	cfu		50	250	50	mg/kg	qd	5	vancomycin	0.3	acute	500	5000	125	mg	qid	10	antibiotic	vancomycin	yes	therapeutic	all	adult,olderadult	phase2	0.863636
https://pubmed.ncbi.nlm.nih.gov/25824219	2015	sustained	spf	c57bl/6	m	39		mouse		kanamycin,gentamicin,colistin,metronidazole,vancomycin+clindamycin+challenge	cumulativemortality	f	t	87	vpi10463	10000	cfu		50	250	50	mg/kg	qd	5	vancomycin	0.3	sustained	500	5000	125	mg	qid	10	antibiotic	vancomycin	yes	therapeutic	all	adult,olderadult	phase2	0.545455
https://pubmed.ncbi.nlm.nih.gov/25824219	2015	sustained	spf	c57bl/6	m	39		mouse		kanamycin,gentamicin,colistin,metronidazole,vancomycin+clindamycin+challenge	cumulativemortality	f	t	87	vpi10463	10000	cfu		50	250	50	mg/kg	qd	5	vancomycin	0.3	acute	500	5000	125	mg	qid	10	antibiotic	vancomycin	no	therapeutic	all	child	phase3	0.704545
https://pubmed.ncbi.nlm.nih.gov/25824219	2015	sustained	spf	c57bl/6	m	39		mouse		kanamycin,gentamicin,colistin,metronidazole,vancomycin+clindamycin+challenge	cumulativemortality	f	t	87	vpi10463	10000	cfu		50	250	50	mg/kg	qd	5	vancomycin	0.3	sustained	500	5000	125	mg	qid	10	antibiotic	vancomycin	no	therapeutic	all	child	phase3	0.741935
https://pubmed.ncbi.nlm.nih.gov/25824219	2015	sustained	spf	c57bl/6	m	39		mouse		kanamycin,gentamicin,colistin,metronidazole,vancomycin+clindamycin+challenge	cumulativemortality	f	t	87	vpi10463	10000	cfu		50	250	50	mg/kg	qd	5	vancomycin	0.3	acute	500	5000	125	mg	qid	10	antibiotic	vancomycin	no	therapeutic	all	child,adult,olderadult	phase3	0.863281
https://pubmed.ncbi.nlm.nih.gov/25824219	2015	sustained	spf	c57bl/6	m	39		mouse		kanamycin,gentamicin,colistin,metronidazole,vancomycin+clindamycin+challenge	cumulativemortality	f	t	87	vpi10463	10000	cfu		50	250	50	mg/kg	qd	5	vancomycin	0.3	sustained	500	5000	125	mg	qid	10	antibiotic	vancomycin	no	therapeutic	all	child,adult,olderadult	phase3	0.779279
https://pubmed.ncbi.nlm.nih.gov/25824219	2015	sustained	spf	c57bl/6	m	39		mouse		kanamycin,gentamicin,colistin,metronidazole,vancomycin+clindamycin+challenge	cumulativemortality	f	t	87	vpi10463	10000	cfu		50	250	50	mg/kg	qd	5	vancomycin	0.3	acute	500	5000	125	mg	qid	10	antibiotic	vancomycin	no	therapeutic	all	child,adult,olderadult	phase3	0.856678
https://pubmed.ncbi.nlm.nih.gov/25824219	2015	sustained	spf	c57bl/6	m	39		mouse		kanamycin,gentamicin,colistin,metronidazole,vancomycin+clindamycin+challenge	cumulativemortality	f	t	87	vpi10463	10000	cfu		50	250	50	mg/kg	qd	5	vancomycin	0.3	sustained	500	5000	125	mg	qid	10	antibiotic	vancomycin	no	therapeutic	all	child,adult,olderadult	phase3	0.745247
https://pubmed.ncbi.nlm.nih.gov/25824219	2015	sustained	spf	c57bl/6	m	39		mouse		kanamycin,gentamicin,colistin,metronidazole,vancomycin+clindamycin+challenge	cumulativemortality	f	t	87	vpi10463	10000	cfu		50	250	50	mg/kg	qd	5	vancomycin	0.3	acute	500	5000	125	mg	qid	10	antibiotic	vancomycin	no	therapeutic	all	adult,olderadult	phase3	0.634783
https://pubmed.ncbi.nlm.nih.gov/25824219	2015	sustained	spf	c57bl/6	m	39		mouse		kanamycin,gentamicin,colistin,metronidazole,vancomycin+clindamycin+challenge	cumulativemortality	f	t	87	vpi10463	10000	cfu		50	250	50	mg/kg	qd	5	vancomycin	0.3	sustained	500	5000	125	mg	qid	10	antibiotic	vancomycin	no	therapeutic	all	adult,olderadult	phase3	0.863014
https://pubmed.ncbi.nlm.nih.gov/25824219	2015	sustained	spf	c57bl/6	m	39		mouse		kanamycin,gentamicin,colistin,metronidazole,vancomycin+clindamycin+challenge	cumulativemortality	f	t	87	vpi10463	10000	cfu		50	250	50	mg/kg	qd	5	vancomycin	0.3	acute	500	5000	125	mg	qid	10	antibiotic	vancomycin	no	therapeutic	all	adult,olderadult	phase3	0.808
https://pubmed.ncbi.nlm.nih.gov/25824219	2015	sustained	spf	c57bl/6	m	39		mouse		kanamycin,gentamicin,colistin,metronidazole,vancomycin+clindamycin+challenge	cumulativemortality	f	t	87	vpi10463	10000	cfu		50	250	50	mg/kg	qd	5	vancomycin	0.3	sustained	500	5000	125	mg	qid	10	antibiotic	vancomycin	no	therapeutic	all	adult,olderadult	phase3	0.823529
https://pubmed.ncbi.nlm.nih.gov/25824219	2015	sustained	spf	c57bl/6	m	39		mouse		kanamycin,gentamicin,colistin,metronidazole,vancomycin+clindamycin+challenge	cumulativemortality	f	t	87	vpi10463	10000	cfu		50	250	50	mg/kg	qd	5	vancomycin	0.3	acute	500	5000	125	mg	qid	10	antibiotic	vancomycin	no	therapeutic	all	adult,olderadult	phase3	0.80597
https://pubmed.ncbi.nlm.nih.gov/25824219	2015	sustained	spf	c57bl/6	m	39		mouse		kanamycin,gentamicin,colistin,metronidazole,vancomycin+clindamycin+challenge	cumulativemortality	f	t	87	vpi10463	10000	cfu		50	250	50	mg/kg	qd	5	vancomycin	0.3	sustained	500	5000	125	mg	qid	10	antibiotic	vancomycin	no	therapeutic	all	adult,olderadult	phase3	0.757009
https://pubmed.ncbi.nlm.nih.gov/25824219	2015	sustained	spf	c57bl/6	m	39		mouse		kanamycin,gentamicin,colistin,metronidazole,vancomycin+clindamycin+challenge	cumulativemortality	f	t	87	vpi10463	10000	cfu		50	250	50	mg/kg	qd	5	vancomycin	0.3	acute	500	5000	125	mg	qid	10	antibiotic	vancomycin	no	therapeutic	all	adult,olderadult	phase2	0.69697
https://pubmed.ncbi.nlm.nih.gov/25824219	2015	sustained	spf	c57bl/6	m	39		mouse		kanamycin,gentamicin,colistin,metronidazole,vancomycin+clindamycin+challenge	cumulativemortality	f	t	87	vpi10463	10000	cfu		50	250	50	mg/kg	qd	5	vancomycin	0.3	sustained	500	5000	125	mg	qid	10	antibiotic	vancomycin	no	therapeutic	all	adult,olderadult	phase2	0.608696
https://pubmed.ncbi.nlm.nih.gov/25824219	2015	sustained	spf	c57bl/6	m	39		mouse		kanamycin,gentamicin,colistin,metronidazole,vancomycin+clindamycin+challenge	cumulativemortality	f	t	87	vpi10463	10000	cfu		50	250	50	mg/kg	qd	5	vancomycin	0.3	acute	500	5000	125	mg	qid	10	antibiotic	vancomycin	no	therapeutic	all	adult,olderadult	phase4	0.666667
https://pubmed.ncbi.nlm.nih.gov/25824219	2015	sustained	spf	c57bl/6	m	39		mouse		kanamycin,gentamicin,colistin,metronidazole,vancomycin+clindamycin+challenge	cumulativemortality	f	t	87	vpi10463	10000	cfu		50	250	50	mg/kg	qd	5	vancomycin	0.3	acute	500	5000	125	mg	qid	10	antibiotic	vancomycin	no	therapeutic	all	adult,olderadult	phase4	1
https://pubmed.ncbi.nlm.nih.gov/25824219	2015	sustained	spf	c57bl/6	m	39		mouse		kanamycin,gentamicin,colistin,metronidazole,vancomycin+clindamycin+challenge	cumulativemortality	f	t	87	vpi10463	10000	cfu		50	250	50	mg/kg	qd	5	vancomycin	0.3	sustained							control	vancomycin	no	therapeutic	all	adult,olderadult	phase3	0.740741
https://pubmed.ncbi.nlm.nih.gov/25824219	2015	sustained	spf	c57bl/6	m	39		mouse		kanamycin,gentamicin,colistin,metronidazole,vancomycin+clindamycin+challenge	cumulativemortality	f	t	87	vpi10463	10000	cfu		50	250	50	mg/kg	qd	5	vancomycin	0.3	sustained							antibiotic	vancomycin	no	therapeutic	all	adult,olderadult	phase3	0.721519
https://pubmed.ncbi.nlm.nih.gov/25824219	2015	sustained	spf	c57bl/6	m	39		mouse		kanamycin,gentamicin,colistin,metronidazole,vancomycin+clindamycin+challenge	cumulativemortality	f	t	87	vpi10463	10000	cfu		50	250	50	mg/kg	qd	5	vancomycin	0.3	sustained							antibiotic	vancomycin	no	therapeutic	all	adult,olderadult	phase2	0.263158
https://pubmed.ncbi.nlm.nih.gov/25824219	2015	sustained	spf	c57bl/6	m	39		mouse		kanamycin,gentamicin,colistin,metronidazole,vancomycin+clindamycin+challenge	cumulativemortality	f	t	87	vpi10463	10000	cfu		50	250	50	mg/kg	qd	5	vancomycin	0.3	acute							antibiotic	vancomycin	no	therapeutic	all	adult,olderadult	phase2	0.306667
https://pubmed.ncbi.nlm.nih.gov/25824219	2015	sustained	spf	c57bl/6	m	39		mouse		kanamycin,gentamicin,colistin,metronidazole,vancomycin+clindamycin+challenge	cumulativemortality	f	t	87	vpi10463	10000	cfu		50	250	50	mg/kg	qd	5	vancomycin	0.3	sustained							antibiotic	vancomycin	no	therapeutic	all	adult,olderadult	phase2	0.306667
https://pubmed.ncbi.nlm.nih.gov/23324518	2013	acute	n/a	goldensyrian	m	54	93	hamster	antibody	clindamycin+challenge	cumulativemortality	t	t	12	atcc43596	3400000	cfu	vegetative	10	50	5	mg/kg	bid	5	vancomycin	1	acute	500	5000	125	mg	qid	10	antibiotic	vancomycin	yes	therapeutic	all	adult,olderadult	phase2	0.893939
https://pubmed.ncbi.nlm.nih.gov/23324518	2013	acute	n/a	goldensyrian	m	54	93	hamster	antibody	clindamycin+challenge	cumulativemortality	t	t	12	atcc43596	3400000	cfu	vegetative	10	50	5	mg/kg	bid	5	vancomycin	1	sustained	500	5000	125	mg	qid	10	antibiotic	vancomycin	yes	therapeutic	all	adult,olderadult	phase2	0.644068
https://pubmed.ncbi.nlm.nih.gov/23324518	2013	acute	n/a	goldensyrian	m	54	93	hamster	antibody	clindamycin+challenge	cumulativemortality	t	t	12	atcc43596	3400000	cfu	vegetative	10	50	5	mg/kg	bid	5	vancomycin	1	sustained	125		125	mg	qd		antibiotic	vancomycin	no	prophylactic	all	olderadult	phase4	1
https://pubmed.ncbi.nlm.nih.gov/23324518	2013	acute	n/a	goldensyrian	m	54	93	hamster	antibody	clindamycin+challenge	cumulativemortality	t	t	12	atcc43596	3400000	cfu	vegetative	10	50	5	mg/kg	bid	5	vancomycin	1	acute	500	5000	125	mg	qid	10	antibiotic	vancomycin	no	therapeutic	all	adult,olderadult	phase3	0.853821
https://pubmed.ncbi.nlm.nih.gov/23324518	2013	acute	n/a	goldensyrian	m	54	93	hamster	antibody	clindamycin+challenge	cumulativemortality	t	t	12	atcc43596	3400000	cfu	vegetative	10	50	5	mg/kg	bid	5	vancomycin	1	sustained	500	5000	125	mg	qid	10	antibiotic	vancomycin	no	therapeutic	all	adult,olderadult	phase3	0.61794
https://pubmed.ncbi.nlm.nih.gov/23324518	2013	acute	n/a	goldensyrian	m	54	93	hamster	antibody	clindamycin+challenge	cumulativemortality	t	t	12	atcc43596	3400000	cfu	vegetative	10	50	5	mg/kg	bid	5	vancomycin	1	acute	500	5000	125	mg	qid	10	antibiotic	vancomycin	no	therapeutic	all	adult,olderadult	phase3	0.849057
https://pubmed.ncbi.nlm.nih.gov/23324518	2013	acute	n/a	goldensyrian	m	54	93	hamster	antibody	clindamycin+challenge	cumulativemortality	t	t	12	atcc43596	3400000	cfu	vegetative	10	50	5	mg/kg	bid	5	vancomycin	1	sustained	500	5000	125	mg	qid	10	antibiotic	vancomycin	no	therapeutic	all	adult,olderadult	phase3	0.622642
https://pubmed.ncbi.nlm.nih.gov/23324518	2013	acute	n/a	goldensyrian	m	54	93	hamster	antibody	clindamycin+challenge	cumulativemortality	t	t	12	atcc43596	3400000	cfu	vegetative	10	50	5	mg/kg	bid	5	vancomycin	1	acute	500	5000	125	mg	qid	10	antibiotic	vancomycin	no	therapeutic	all	adult,olderadult	phase4	0.821229
https://pubmed.ncbi.nlm.nih.gov/23324518	2013	acute	n/a	goldensyrian	m	54	93	hamster	antibody	clindamycin+challenge	cumulativemortality	t	t	12	atcc43596	3400000	cfu	vegetative	10	50	5	mg/kg	bid	5	vancomycin	1	sustained	500	5000	125	mg	qid	10	antibiotic	vancomycin	no	therapeutic	all	adult,olderadult	phase4	0.592179
https://pubmed.ncbi.nlm.nih.gov/23324518	2013	acute	n/a	goldensyrian	m	54	93	hamster	antibody	clindamycin+challenge	cumulativemortality	t	t	12	atcc43596	3400000	cfu	vegetative	10	50	5	mg/kg	bid	5	vancomycin	1	acute	500	5000	125	mg	qid	10	antibiotic	vancomycin	no	therapeutic	all	adult,olderadult	phase3	0.835714
https://pubmed.ncbi.nlm.nih.gov/23324518	2013	acute	n/a	goldensyrian	m	54	93	hamster	antibody	clindamycin+challenge	cumulativemortality	t	t	12	atcc43596	3400000	cfu	vegetative	10	50	5	mg/kg	bid	5	vancomycin	1	sustained	500	5000	125	mg	qid	10	antibiotic	vancomycin	no	therapeutic	all	adult,olderadult	phase3	0.610714
https://pubmed.ncbi.nlm.nih.gov/23324518	2013	acute	n/a	goldensyrian	m	54	93	hamster	antibody	clindamycin+challenge	cumulativemortality	t	t	12	atcc43596	3400000	cfu	vegetative	10	50	5	mg/kg	bid	5	vancomycin	1	acute	500	5000	125	mg	qid	10	antibiotic	vancomycin	no	therapeutic	all	adult,olderadult	phase3	0.818493
https://pubmed.ncbi.nlm.nih.gov/23324518	2013	acute	n/a	goldensyrian	m	54	93	hamster	antibody	clindamycin+challenge	cumulativemortality	t	t	12	atcc43596	3400000	cfu	vegetative	10	50	5	mg/kg	bid	5	vancomycin	1	sustained	500	5000	125	mg	qid	10	antibiotic	vancomycin	no	therapeutic	all	adult,olderadult	phase3	0.589041
https://pubmed.ncbi.nlm.nih.gov/23324518	2013	acute	n/a	goldensyrian	m	54	93	hamster	antibody	clindamycin+challenge	cumulativemortality	t	t	12	atcc43596	3400000	cfu	vegetative	10	50	5	mg/kg	bid	5	vancomycin	1	acute	500	5000	125	mg	qid	10	antibiotic	vancomycin	no	therapeutic	all	adult,olderadult	phase3	0.87963
https://pubmed.ncbi.nlm.nih.gov/23324518	2013	acute	n/a	goldensyrian	m	54	93	hamster	antibody	clindamycin+challenge	cumulativemortality	t	t	12	atcc43596	3400000	cfu	vegetative	10	50	5	mg/kg	bid	5	vancomycin	1	sustained	500	5000	125	mg	qid	10	antibiotic	vancomycin	no	therapeutic	all	adult,olderadult	phase3	0.657407
https://pubmed.ncbi.nlm.nih.gov/23324518	2013	acute	n/a	goldensyrian	m	54	93	hamster	antibody	clindamycin+challenge	cumulativemortality	t	t	12	atcc43596	3400000	cfu	vegetative	10	50	5	mg/kg	bid	5	vancomycin	1	acute	500	5000	125	mg	qid	10	antibiotic	vancomycin	no	therapeutic	all	adult,olderadult	phase3	0.1875
https://pubmed.ncbi.nlm.nih.gov/23324518	2013	acute	n/a	goldensyrian	m	54	93	hamster	antibody	clindamycin+challenge	cumulativemortality	t	t	12	atcc43596	3400000	cfu	vegetative	10	50	5	mg/kg	bid	5	vancomycin	1	sustained	500	5000	125	mg	qid	10	antibiotic	vancomycin	no	therapeutic	all	adult,olderadult	phase3	0.3125
https://pubmed.ncbi.nlm.nih.gov/23324518	2013	acute	n/a	goldensyrian	m	54	93	hamster	antibody	clindamycin+challenge	cumulativemortality	t	t	12	atcc43596	3400000	cfu	vegetative	10	50	5	mg/kg	bid	5	vancomycin	1	acute	500	5000	125	mg	qid	10	antibiotic	vancomycin	yes	therapeutic	all	adult,olderadult	phase2	0.863636
https://pubmed.ncbi.nlm.nih.gov/23324518	2013	acute	n/a	goldensyrian	m	54	93	hamster	antibody	clindamycin+challenge	cumulativemortality	t	t	12	atcc43596	3400000	cfu	vegetative	10	50	5	mg/kg	bid	5	vancomycin	1	sustained	500	5000	125	mg	qid	10	antibiotic	vancomycin	yes	therapeutic	all	adult,olderadult	phase2	0.545455
https://pubmed.ncbi.nlm.nih.gov/23324518	2013	acute	n/a	goldensyrian	m	54	93	hamster	antibody	clindamycin+challenge	cumulativemortality	t	t	12	atcc43596	3400000	cfu	vegetative	10	50	5	mg/kg	bid	5	vancomycin	1	acute	500	5000	125	mg	qid	10	antibiotic	vancomycin	no	therapeutic	all	child	phase3	0.704545
https://pubmed.ncbi.nlm.nih.gov/23324518	2013	acute	n/a	goldensyrian	m	54	93	hamster	antibody	clindamycin+challenge	cumulativemortality	t	t	12	atcc43596	3400000	cfu	vegetative	10	50	5	mg/kg	bid	5	vancomycin	1	sustained	500	5000	125	mg	qid	10	antibiotic	vancomycin	no	therapeutic	all	child	phase3	0.741935
https://pubmed.ncbi.nlm.nih.gov/23324518	2013	acute	n/a	goldensyrian	m	54	93	hamster	antibody	clindamycin+challenge	cumulativemortality	t	t	12	atcc43596	3400000	cfu	vegetative	10	50	5	mg/kg	bid	5	vancomycin	1	acute	500	5000	125	mg	qid	10	antibiotic	vancomycin	no	therapeutic	all	child,adult,olderadult	phase3	0.863281
https://pubmed.ncbi.nlm.nih.gov/23324518	2013	acute	n/a	goldensyrian	m	54	93	hamster	antibody	clindamycin+challenge	cumulativemortality	t	t	12	atcc43596	3400000	cfu	vegetative	10	50	5	mg/kg	bid	5	vancomycin	1	sustained	500	5000	125	mg	qid	10	antibiotic	vancomycin	no	therapeutic	all	child,adult,olderadult	phase3	0.779279
https://pubmed.ncbi.nlm.nih.gov/23324518	2013	acute	n/a	goldensyrian	m	54	93	hamster	antibody	clindamycin+challenge	cumulativemortality	t	t	12	atcc43596	3400000	cfu	vegetative	10	50	5	mg/kg	bid	5	vancomycin	1	acute	500	5000	125	mg	qid	10	antibiotic	vancomycin	no	therapeutic	all	child,adult,olderadult	phase3	0.856678
https://pubmed.ncbi.nlm.nih.gov/23324518	2013	acute	n/a	goldensyrian	m	54	93	hamster	antibody	clindamycin+challenge	cumulativemortality	t	t	12	atcc43596	3400000	cfu	vegetative	10	50	5	mg/kg	bid	5	vancomycin	1	sustained	500	5000	125	mg	qid	10	antibiotic	vancomycin	no	therapeutic	all	child,adult,olderadult	phase3	0.745247
https://pubmed.ncbi.nlm.nih.gov/23324518	2013	acute	n/a	goldensyrian	m	54	93	hamster	antibody	clindamycin+challenge	cumulativemortality	t	t	12	atcc43596	3400000	cfu	vegetative	10	50	5	mg/kg	bid	5	vancomycin	1	acute	500	5000	125	mg	qid	10	antibiotic	vancomycin	no	therapeutic	all	adult,olderadult	phase3	0.634783
https://pubmed.ncbi.nlm.nih.gov/23324518	2013	acute	n/a	goldensyrian	m	54	93	hamster	antibody	clindamycin+challenge	cumulativemortality	t	t	12	atcc43596	3400000	cfu	vegetative	10	50	5	mg/kg	bid	5	vancomycin	1	sustained	500	5000	125	mg	qid	10	antibiotic	vancomycin	no	therapeutic	all	adult,olderadult	phase3	0.863014
https://pubmed.ncbi.nlm.nih.gov/23324518	2013	acute	n/a	goldensyrian	m	54	93	hamster	antibody	clindamycin+challenge	cumulativemortality	t	t	12	atcc43596	3400000	cfu	vegetative	10	50	5	mg/kg	bid	5	vancomycin	1	acute	500	5000	125	mg	qid	10	antibiotic	vancomycin	no	therapeutic	all	adult,olderadult	phase3	0.808
https://pubmed.ncbi.nlm.nih.gov/23324518	2013	acute	n/a	goldensyrian	m	54	93	hamster	antibody	clindamycin+challenge	cumulativemortality	t	t	12	atcc43596	3400000	cfu	vegetative	10	50	5	mg/kg	bid	5	vancomycin	1	sustained	500	5000	125	mg	qid	10	antibiotic	vancomycin	no	therapeutic	all	adult,olderadult	phase3	0.823529
https://pubmed.ncbi.nlm.nih.gov/23324518	2013	acute	n/a	goldensyrian	m	54	93	hamster	antibody	clindamycin+challenge	cumulativemortality	t	t	12	atcc43596	3400000	cfu	vegetative	10	50	5	mg/kg	bid	5	vancomycin	1	acute	500	5000	125	mg	qid	10	antibiotic	vancomycin	no	therapeutic	all	adult,olderadult	phase3	0.80597
https://pubmed.ncbi.nlm.nih.gov/23324518	2013	acute	n/a	goldensyrian	m	54	93	hamster	antibody	clindamycin+challenge	cumulativemortality	t	t	12	atcc43596	3400000	cfu	vegetative	10	50	5	mg/kg	bid	5	vancomycin	1	sustained	500	5000	125	mg	qid	10	antibiotic	vancomycin	no	therapeutic	all	adult,olderadult	phase3	0.757009
https://pubmed.ncbi.nlm.nih.gov/23324518	2013	acute	n/a	goldensyrian	m	54	93	hamster	antibody	clindamycin+challenge	cumulativemortality	t	t	12	atcc43596	3400000	cfu	vegetative	10	50	5	mg/kg	bid	5	vancomycin	1	acute	500	5000	125	mg	qid	10	antibiotic	vancomycin	no	therapeutic	all	adult,olderadult	phase2	0.69697
https://pubmed.ncbi.nlm.nih.gov/23324518	2013	acute	n/a	goldensyrian	m	54	93	hamster	antibody	clindamycin+challenge	cumulativemortality	t	t	12	atcc43596	3400000	cfu	vegetative	10	50	5	mg/kg	bid	5	vancomycin	1	sustained	500	5000	125	mg	qid	10	antibiotic	vancomycin	no	therapeutic	all	adult,olderadult	phase2	0.608696
https://pubmed.ncbi.nlm.nih.gov/23324518	2013	acute	n/a	goldensyrian	m	54	93	hamster	antibody	clindamycin+challenge	cumulativemortality	t	t	12	atcc43596	3400000	cfu	vegetative	10	50	5	mg/kg	bid	5	vancomycin	1	acute	500	5000	125	mg	qid	10	antibiotic	vancomycin	no	therapeutic	all	adult,olderadult	phase4	0.666667
https://pubmed.ncbi.nlm.nih.gov/23324518	2013	acute	n/a	goldensyrian	m	54	93	hamster	antibody	clindamycin+challenge	cumulativemortality	t	t	12	atcc43596	3400000	cfu	vegetative	10	50	5	mg/kg	bid	5	vancomycin	1	acute	500	5000	125	mg	qid	10	antibiotic	vancomycin	no	therapeutic	all	adult,olderadult	phase4	1
https://pubmed.ncbi.nlm.nih.gov/23324518	2013	acute	n/a	goldensyrian	m	54	93	hamster	antibody	clindamycin+challenge	cumulativemortality	t	t	12	atcc43596	3400000	cfu	vegetative	10	50	5	mg/kg	bid	5	vancomycin	1	sustained							control	vancomycin	no	therapeutic	all	adult,olderadult	phase3	0.740741
https://pubmed.ncbi.nlm.nih.gov/23324518	2013	acute	n/a	goldensyrian	m	54	93	hamster	antibody	clindamycin+challenge	cumulativemortality	t	t	12	atcc43596	3400000	cfu	vegetative	10	50	5	mg/kg	bid	5	vancomycin	1	sustained							antibiotic	vancomycin	no	therapeutic	all	adult,olderadult	phase3	0.721519
https://pubmed.ncbi.nlm.nih.gov/23324518	2013	acute	n/a	goldensyrian	m	54	93	hamster	antibody	clindamycin+challenge	cumulativemortality	t	t	12	atcc43596	3400000	cfu	vegetative	10	50	5	mg/kg	bid	5	vancomycin	1	sustained							antibiotic	vancomycin	no	therapeutic	all	adult,olderadult	phase2	0.263158
https://pubmed.ncbi.nlm.nih.gov/23324518	2013	acute	n/a	goldensyrian	m	54	93	hamster	antibody	clindamycin+challenge	cumulativemortality	t	t	12	atcc43596	3400000	cfu	vegetative	10	50	5	mg/kg	bid	5	vancomycin	1	acute							antibiotic	vancomycin	no	therapeutic	all	adult,olderadult	phase2	0.306667
https://pubmed.ncbi.nlm.nih.gov/23324518	2013	acute	n/a	goldensyrian	m	54	93	hamster	antibody	clindamycin+challenge	cumulativemortality	t	t	12	atcc43596	3400000	cfu	vegetative	10	50	5	mg/kg	bid	5	vancomycin	1	sustained							antibiotic	vancomycin	no	therapeutic	all	adult,olderadult	phase2	0.306667
https://pubmed.ncbi.nlm.nih.gov/23324518	2013	sustained	n/a	goldensyrian	m	54	93	hamster	antibody	clindamycin+challenge	cumulativemortality	t	t	12	atcc43596	3400000	cfu	vegetative	10	50	5	mg/kg	bid	5	vancomycin	0	acute	500	5000	125	mg	qid	10	antibiotic	vancomycin	yes	therapeutic	all	adult,olderadult	phase2	0.893939
https://pubmed.ncbi.nlm.nih.gov/23324518	2013	sustained	n/a	goldensyrian	m	54	93	hamster	antibody	clindamycin+challenge	cumulativemortality	t	t	12	atcc43596	3400000	cfu	vegetative	10	50	5	mg/kg	bid	5	vancomycin	0	sustained	500	5000	125	mg	qid	10	antibiotic	vancomycin	yes	therapeutic	all	adult,olderadult	phase2	0.644068
https://pubmed.ncbi.nlm.nih.gov/23324518	2013	sustained	n/a	goldensyrian	m	54	93	hamster	antibody	clindamycin+challenge	cumulativemortality	t	t	12	atcc43596	3400000	cfu	vegetative	10	50	5	mg/kg	bid	5	vancomycin	0	sustained	125		125	mg	qd		antibiotic	vancomycin	no	prophylactic	all	olderadult	phase4	1
https://pubmed.ncbi.nlm.nih.gov/23324518	2013	sustained	n/a	goldensyrian	m	54	93	hamster	antibody	clindamycin+challenge	cumulativemortality	t	t	12	atcc43596	3400000	cfu	vegetative	10	50	5	mg/kg	bid	5	vancomycin	0	acute	500	5000	125	mg	qid	10	antibiotic	vancomycin	no	therapeutic	all	adult,olderadult	phase3	0.853821
https://pubmed.ncbi.nlm.nih.gov/23324518	2013	sustained	n/a	goldensyrian	m	54	93	hamster	antibody	clindamycin+challenge	cumulativemortality	t	t	12	atcc43596	3400000	cfu	vegetative	10	50	5	mg/kg	bid	5	vancomycin	0	sustained	500	5000	125	mg	qid	10	antibiotic	vancomycin	no	therapeutic	all	adult,olderadult	phase3	0.61794
https://pubmed.ncbi.nlm.nih.gov/23324518	2013	sustained	n/a	goldensyrian	m	54	93	hamster	antibody	clindamycin+challenge	cumulativemortality	t	t	12	atcc43596	3400000	cfu	vegetative	10	50	5	mg/kg	bid	5	vancomycin	0	acute	500	5000	125	mg	qid	10	antibiotic	vancomycin	no	therapeutic	all	adult,olderadult	phase3	0.849057
https://pubmed.ncbi.nlm.nih.gov/23324518	2013	sustained	n/a	goldensyrian	m	54	93	hamster	antibody	clindamycin+challenge	cumulativemortality	t	t	12	atcc43596	3400000	cfu	vegetative	10	50	5	mg/kg	bid	5	vancomycin	0	sustained	500	5000	125	mg	qid	10	antibiotic	vancomycin	no	therapeutic	all	adult,olderadult	phase3	0.622642
https://pubmed.ncbi.nlm.nih.gov/23324518	2013	sustained	n/a	goldensyrian	m	54	93	hamster	antibody	clindamycin+challenge	cumulativemortality	t	t	12	atcc43596	3400000	cfu	vegetative	10	50	5	mg/kg	bid	5	vancomycin	0	acute	500	5000	125	mg	qid	10	antibiotic	vancomycin	no	therapeutic	all	adult,olderadult	phase4	0.821229
https://pubmed.ncbi.nlm.nih.gov/23324518	2013	sustained	n/a	goldensyrian	m	54	93	hamster	antibody	clindamycin+challenge	cumulativemortality	t	t	12	atcc43596	3400000	cfu	vegetative	10	50	5	mg/kg	bid	5	vancomycin	0	sustained	500	5000	125	mg	qid	10	antibiotic	vancomycin	no	therapeutic	all	adult,olderadult	phase4	0.592179
https://pubmed.ncbi.nlm.nih.gov/23324518	2013	sustained	n/a	goldensyrian	m	54	93	hamster	antibody	clindamycin+challenge	cumulativemortality	t	t	12	atcc43596	3400000	cfu	vegetative	10	50	5	mg/kg	bid	5	vancomycin	0	acute	500	5000	125	mg	qid	10	antibiotic	vancomycin	no	therapeutic	all	adult,olderadult	phase3	0.835714
https://pubmed.ncbi.nlm.nih.gov/23324518	2013	sustained	n/a	goldensyrian	m	54	93	hamster	antibody	clindamycin+challenge	cumulativemortality	t	t	12	atcc43596	3400000	cfu	vegetative	10	50	5	mg/kg	bid	5	vancomycin	0	sustained	500	5000	125	mg	qid	10	antibiotic	vancomycin	no	therapeutic	all	adult,olderadult	phase3	0.610714
https://pubmed.ncbi.nlm.nih.gov/23324518	2013	sustained	n/a	goldensyrian	m	54	93	hamster	antibody	clindamycin+challenge	cumulativemortality	t	t	12	atcc43596	3400000	cfu	vegetative	10	50	5	mg/kg	bid	5	vancomycin	0	acute	500	5000	125	mg	qid	10	antibiotic	vancomycin	no	therapeutic	all	adult,olderadult	phase3	0.818493
https://pubmed.ncbi.nlm.nih.gov/23324518	2013	sustained	n/a	goldensyrian	m	54	93	hamster	antibody	clindamycin+challenge	cumulativemortality	t	t	12	atcc43596	3400000	cfu	vegetative	10	50	5	mg/kg	bid	5	vancomycin	0	sustained	500	5000	125	mg	qid	10	antibiotic	vancomycin	no	therapeutic	all	adult,olderadult	phase3	0.589041
https://pubmed.ncbi.nlm.nih.gov/23324518	2013	sustained	n/a	goldensyrian	m	54	93	hamster	antibody	clindamycin+challenge	cumulativemortality	t	t	12	atcc43596	3400000	cfu	vegetative	10	50	5	mg/kg	bid	5	vancomycin	0	acute	500	5000	125	mg	qid	10	antibiotic	vancomycin	no	therapeutic	all	adult,olderadult	phase3	0.87963
https://pubmed.ncbi.nlm.nih.gov/23324518	2013	sustained	n/a	goldensyrian	m	54	93	hamster	antibody	clindamycin+challenge	cumulativemortality	t	t	12	atcc43596	3400000	cfu	vegetative	10	50	5	mg/kg	bid	5	vancomycin	0	sustained	500	5000	125	mg	qid	10	antibiotic	vancomycin	no	therapeutic	all	adult,olderadult	phase3	0.657407
https://pubmed.ncbi.nlm.nih.gov/23324518	2013	sustained	n/a	goldensyrian	m	54	93	hamster	antibody	clindamycin+challenge	cumulativemortality	t	t	12	atcc43596	3400000	cfu	vegetative	10	50	5	mg/kg	bid	5	vancomycin	0	acute	500	5000	125	mg	qid	10	antibiotic	vancomycin	no	therapeutic	all	adult,olderadult	phase3	0.1875
https://pubmed.ncbi.nlm.nih.gov/23324518	2013	sustained	n/a	goldensyrian	m	54	93	hamster	antibody	clindamycin+challenge	cumulativemortality	t	t	12	atcc43596	3400000	cfu	vegetative	10	50	5	mg/kg	bid	5	vancomycin	0	sustained	500	5000	125	mg	qid	10	antibiotic	vancomycin	no	therapeutic	all	adult,olderadult	phase3	0.3125
https://pubmed.ncbi.nlm.nih.gov/23324518	2013	sustained	n/a	goldensyrian	m	54	93	hamster	antibody	clindamycin+challenge	cumulativemortality	t	t	12	atcc43596	3400000	cfu	vegetative	10	50	5	mg/kg	bid	5	vancomycin	0	acute	500	5000	125	mg	qid	10	antibiotic	vancomycin	yes	therapeutic	all	adult,olderadult	phase2	0.863636
https://pubmed.ncbi.nlm.nih.gov/23324518	2013	sustained	n/a	goldensyrian	m	54	93	hamster	antibody	clindamycin+challenge	cumulativemortality	t	t	12	atcc43596	3400000	cfu	vegetative	10	50	5	mg/kg	bid	5	vancomycin	0	sustained	500	5000	125	mg	qid	10	antibiotic	vancomycin	yes	therapeutic	all	adult,olderadult	phase2	0.545455
https://pubmed.ncbi.nlm.nih.gov/23324518	2013	sustained	n/a	goldensyrian	m	54	93	hamster	antibody	clindamycin+challenge	cumulativemortality	t	t	12	atcc43596	3400000	cfu	vegetative	10	50	5	mg/kg	bid	5	vancomycin	0	acute	500	5000	125	mg	qid	10	antibiotic	vancomycin	no	therapeutic	all	child	phase3	0.704545
https://pubmed.ncbi.nlm.nih.gov/23324518	2013	sustained	n/a	goldensyrian	m	54	93	hamster	antibody	clindamycin+challenge	cumulativemortality	t	t	12	atcc43596	3400000	cfu	vegetative	10	50	5	mg/kg	bid	5	vancomycin	0	sustained	500	5000	125	mg	qid	10	antibiotic	vancomycin	no	therapeutic	all	child	phase3	0.741935
https://pubmed.ncbi.nlm.nih.gov/23324518	2013	sustained	n/a	goldensyrian	m	54	93	hamster	antibody	clindamycin+challenge	cumulativemortality	t	t	12	atcc43596	3400000	cfu	vegetative	10	50	5	mg/kg	bid	5	vancomycin	0	acute	500	5000	125	mg	qid	10	antibiotic	vancomycin	no	therapeutic	all	child,adult,olderadult	phase3	0.863281
https://pubmed.ncbi.nlm.nih.gov/23324518	2013	sustained	n/a	goldensyrian	m	54	93	hamster	antibody	clindamycin+challenge	cumulativemortality	t	t	12	atcc43596	3400000	cfu	vegetative	10	50	5	mg/kg	bid	5	vancomycin	0	sustained	500	5000	125	mg	qid	10	antibiotic	vancomycin	no	therapeutic	all	child,adult,olderadult	phase3	0.779279
https://pubmed.ncbi.nlm.nih.gov/23324518	2013	sustained	n/a	goldensyrian	m	54	93	hamster	antibody	clindamycin+challenge	cumulativemortality	t	t	12	atcc43596	3400000	cfu	vegetative	10	50	5	mg/kg	bid	5	vancomycin	0	acute	500	5000	125	mg	qid	10	antibiotic	vancomycin	no	therapeutic	all	child,adult,olderadult	phase3	0.856678
https://pubmed.ncbi.nlm.nih.gov/23324518	2013	sustained	n/a	goldensyrian	m	54	93	hamster	antibody	clindamycin+challenge	cumulativemortality	t	t	12	atcc43596	3400000	cfu	vegetative	10	50	5	mg/kg	bid	5	vancomycin	0	sustained	500	5000	125	mg	qid	10	antibiotic	vancomycin	no	therapeutic	all	child,adult,olderadult	phase3	0.745247
https://pubmed.ncbi.nlm.nih.gov/23324518	2013	sustained	n/a	goldensyrian	m	54	93	hamster	antibody	clindamycin+challenge	cumulativemortality	t	t	12	atcc43596	3400000	cfu	vegetative	10	50	5	mg/kg	bid	5	vancomycin	0	acute	500	5000	125	mg	qid	10	antibiotic	vancomycin	no	therapeutic	all	adult,olderadult	phase3	0.634783
https://pubmed.ncbi.nlm.nih.gov/23324518	2013	sustained	n/a	goldensyrian	m	54	93	hamster	antibody	clindamycin+challenge	cumulativemortality	t	t	12	atcc43596	3400000	cfu	vegetative	10	50	5	mg/kg	bid	5	vancomycin	0	sustained	500	5000	125	mg	qid	10	antibiotic	vancomycin	no	therapeutic	all	adult,olderadult	phase3	0.863014
https://pubmed.ncbi.nlm.nih.gov/23324518	2013	sustained	n/a	goldensyrian	m	54	93	hamster	antibody	clindamycin+challenge	cumulativemortality	t	t	12	atcc43596	3400000	cfu	vegetative	10	50	5	mg/kg	bid	5	vancomycin	0	acute	500	5000	125	mg	qid	10	antibiotic	vancomycin	no	therapeutic	all	adult,olderadult	phase3	0.808
https://pubmed.ncbi.nlm.nih.gov/23324518	2013	sustained	n/a	goldensyrian	m	54	93	hamster	antibody	clindamycin+challenge	cumulativemortality	t	t	12	atcc43596	3400000	cfu	vegetative	10	50	5	mg/kg	bid	5	vancomycin	0	sustained	500	5000	125	mg	qid	10	antibiotic	vancomycin	no	therapeutic	all	adult,olderadult	phase3	0.823529
https://pubmed.ncbi.nlm.nih.gov/23324518	2013	sustained	n/a	goldensyrian	m	54	93	hamster	antibody	clindamycin+challenge	cumulativemortality	t	t	12	atcc43596	3400000	cfu	vegetative	10	50	5	mg/kg	bid	5	vancomycin	0	acute	500	5000	125	mg	qid	10	antibiotic	vancomycin	no	therapeutic	all	adult,olderadult	phase3	0.80597
https://pubmed.ncbi.nlm.nih.gov/23324518	2013	sustained	n/a	goldensyrian	m	54	93	hamster	antibody	clindamycin+challenge	cumulativemortality	t	t	12	atcc43596	3400000	cfu	vegetative	10	50	5	mg/kg	bid	5	vancomycin	0	sustained	500	5000	125	mg	qid	10	antibiotic	vancomycin	no	therapeutic	all	adult,olderadult	phase3	0.757009
https://pubmed.ncbi.nlm.nih.gov/23324518	2013	sustained	n/a	goldensyrian	m	54	93	hamster	antibody	clindamycin+challenge	cumulativemortality	t	t	12	atcc43596	3400000	cfu	vegetative	10	50	5	mg/kg	bid	5	vancomycin	0	acute	500	5000	125	mg	qid	10	antibiotic	vancomycin	no	therapeutic	all	adult,olderadult	phase2	0.69697
https://pubmed.ncbi.nlm.nih.gov/23324518	2013	sustained	n/a	goldensyrian	m	54	93	hamster	antibody	clindamycin+challenge	cumulativemortality	t	t	12	atcc43596	3400000	cfu	vegetative	10	50	5	mg/kg	bid	5	vancomycin	0	sustained	500	5000	125	mg	qid	10	antibiotic	vancomycin	no	therapeutic	all	adult,olderadult	phase2	0.608696
https://pubmed.ncbi.nlm.nih.gov/23324518	2013	sustained	n/a	goldensyrian	m	54	93	hamster	antibody	clindamycin+challenge	cumulativemortality	t	t	12	atcc43596	3400000	cfu	vegetative	10	50	5	mg/kg	bid	5	vancomycin	0	acute	500	5000	125	mg	qid	10	antibiotic	vancomycin	no	therapeutic	all	adult,olderadult	phase4	0.666667
https://pubmed.ncbi.nlm.nih.gov/23324518	2013	sustained	n/a	goldensyrian	m	54	93	hamster	antibody	clindamycin+challenge	cumulativemortality	t	t	12	atcc43596	3400000	cfu	vegetative	10	50	5	mg/kg	bid	5	vancomycin	0	acute	500	5000	125	mg	qid	10	antibiotic	vancomycin	no	therapeutic	all	adult,olderadult	phase4	1
https://pubmed.ncbi.nlm.nih.gov/23324518	2013	sustained	n/a	goldensyrian	m	54	93	hamster	antibody	clindamycin+challenge	cumulativemortality	t	t	12	atcc43596	3400000	cfu	vegetative	10	50	5	mg/kg	bid	5	vancomycin	0	sustained							control	vancomycin	no	therapeutic	all	adult,olderadult	phase3	0.740741
https://pubmed.ncbi.nlm.nih.gov/23324518	2013	sustained	n/a	goldensyrian	m	54	93	hamster	antibody	clindamycin+challenge	cumulativemortality	t	t	12	atcc43596	3400000	cfu	vegetative	10	50	5	mg/kg	bid	5	vancomycin	0	sustained							antibiotic	vancomycin	no	therapeutic	all	adult,olderadult	phase3	0.721519
https://pubmed.ncbi.nlm.nih.gov/23324518	2013	sustained	n/a	goldensyrian	m	54	93	hamster	antibody	clindamycin+challenge	cumulativemortality	t	t	12	atcc43596	3400000	cfu	vegetative	10	50	5	mg/kg	bid	5	vancomycin	0	sustained							antibiotic	vancomycin	no	therapeutic	all	adult,olderadult	phase2	0.263158
https://pubmed.ncbi.nlm.nih.gov/23324518	2013	sustained	n/a	goldensyrian	m	54	93	hamster	antibody	clindamycin+challenge	cumulativemortality	t	t	12	atcc43596	3400000	cfu	vegetative	10	50	5	mg/kg	bid	5	vancomycin	0	acute							antibiotic	vancomycin	no	therapeutic	all	adult,olderadult	phase2	0.306667
https://pubmed.ncbi.nlm.nih.gov/23324518	2013	sustained	n/a	goldensyrian	m	54	93	hamster	antibody	clindamycin+challenge	cumulativemortality	t	t	12	atcc43596	3400000	cfu	vegetative	10	50	5	mg/kg	bid	5	vancomycin	0	sustained							antibiotic	vancomycin	no	therapeutic	all	adult,olderadult	phase2	0.306667
https://pubmed.ncbi.nlm.nih.gov/29483125	2018	acute	n/a	goldensyrian	f	42	100	hamster		clindamycin+challenge	survival	f	t	12	630	100		spores	10	50	5	mg/kg	bid	5	vancomycin	1	acute	500	5000	125	mg	qid	10	antibiotic	vancomycin	yes	therapeutic	all	adult,olderadult	phase2	0.893939
https://pubmed.ncbi.nlm.nih.gov/29483125	2018	acute	n/a	goldensyrian	f	42	100	hamster		clindamycin+challenge	survival	f	t	12	630	100		spores	10	50	5	mg/kg	bid	5	vancomycin	1	sustained	500	5000	125	mg	qid	10	antibiotic	vancomycin	yes	therapeutic	all	adult,olderadult	phase2	0.644068
https://pubmed.ncbi.nlm.nih.gov/29483125	2018	acute	n/a	goldensyrian	f	42	100	hamster		clindamycin+challenge	survival	f	t	12	630	100		spores	10	50	5	mg/kg	bid	5	vancomycin	1	sustained	125		125	mg	qd		antibiotic	vancomycin	no	prophylactic	all	olderadult	phase4	1
https://pubmed.ncbi.nlm.nih.gov/29483125	2018	acute	n/a	goldensyrian	f	42	100	hamster		clindamycin+challenge	survival	f	t	12	630	100		spores	10	50	5	mg/kg	bid	5	vancomycin	1	acute	500	5000	125	mg	qid	10	antibiotic	vancomycin	no	therapeutic	all	adult,olderadult	phase3	0.853821
https://pubmed.ncbi.nlm.nih.gov/29483125	2018	acute	n/a	goldensyrian	f	42	100	hamster		clindamycin+challenge	survival	f	t	12	630	100		spores	10	50	5	mg/kg	bid	5	vancomycin	1	sustained	500	5000	125	mg	qid	10	antibiotic	vancomycin	no	therapeutic	all	adult,olderadult	phase3	0.61794
https://pubmed.ncbi.nlm.nih.gov/29483125	2018	acute	n/a	goldensyrian	f	42	100	hamster		clindamycin+challenge	survival	f	t	12	630	100		spores	10	50	5	mg/kg	bid	5	vancomycin	1	acute	500	5000	125	mg	qid	10	antibiotic	vancomycin	no	therapeutic	all	adult,olderadult	phase3	0.849057
https://pubmed.ncbi.nlm.nih.gov/29483125	2018	acute	n/a	goldensyrian	f	42	100	hamster		clindamycin+challenge	survival	f	t	12	630	100		spores	10	50	5	mg/kg	bid	5	vancomycin	1	sustained	500	5000	125	mg	qid	10	antibiotic	vancomycin	no	therapeutic	all	adult,olderadult	phase3	0.622642
https://pubmed.ncbi.nlm.nih.gov/29483125	2018	acute	n/a	goldensyrian	f	42	100	hamster		clindamycin+challenge	survival	f	t	12	630	100		spores	10	50	5	mg/kg	bid	5	vancomycin	1	acute	500	5000	125	mg	qid	10	antibiotic	vancomycin	no	therapeutic	all	adult,olderadult	phase4	0.821229
https://pubmed.ncbi.nlm.nih.gov/29483125	2018	acute	n/a	goldensyrian	f	42	100	hamster		clindamycin+challenge	survival	f	t	12	630	100		spores	10	50	5	mg/kg	bid	5	vancomycin	1	sustained	500	5000	125	mg	qid	10	antibiotic	vancomycin	no	therapeutic	all	adult,olderadult	phase4	0.592179
https://pubmed.ncbi.nlm.nih.gov/29483125	2018	acute	n/a	goldensyrian	f	42	100	hamster		clindamycin+challenge	survival	f	t	12	630	100		spores	10	50	5	mg/kg	bid	5	vancomycin	1	acute	500	5000	125	mg	qid	10	antibiotic	vancomycin	no	therapeutic	all	adult,olderadult	phase3	0.835714
https://pubmed.ncbi.nlm.nih.gov/29483125	2018	acute	n/a	goldensyrian	f	42	100	hamster		clindamycin+challenge	survival	f	t	12	630	100		spores	10	50	5	mg/kg	bid	5	vancomycin	1	sustained	500	5000	125	mg	qid	10	antibiotic	vancomycin	no	therapeutic	all	adult,olderadult	phase3	0.610714
https://pubmed.ncbi.nlm.nih.gov/29483125	2018	acute	n/a	goldensyrian	f	42	100	hamster		clindamycin+challenge	survival	f	t	12	630	100		spores	10	50	5	mg/kg	bid	5	vancomycin	1	acute	500	5000	125	mg	qid	10	antibiotic	vancomycin	no	therapeutic	all	adult,olderadult	phase3	0.818493
https://pubmed.ncbi.nlm.nih.gov/29483125	2018	acute	n/a	goldensyrian	f	42	100	hamster		clindamycin+challenge	survival	f	t	12	630	100		spores	10	50	5	mg/kg	bid	5	vancomycin	1	sustained	500	5000	125	mg	qid	10	antibiotic	vancomycin	no	therapeutic	all	adult,olderadult	phase3	0.589041
https://pubmed.ncbi.nlm.nih.gov/29483125	2018	acute	n/a	goldensyrian	f	42	100	hamster		clindamycin+challenge	survival	f	t	12	630	100		spores	10	50	5	mg/kg	bid	5	vancomycin	1	acute	500	5000	125	mg	qid	10	antibiotic	vancomycin	no	therapeutic	all	adult,olderadult	phase3	0.87963
https://pubmed.ncbi.nlm.nih.gov/29483125	2018	acute	n/a	goldensyrian	f	42	100	hamster		clindamycin+challenge	survival	f	t	12	630	100		spores	10	50	5	mg/kg	bid	5	vancomycin	1	sustained	500	5000	125	mg	qid	10	antibiotic	vancomycin	no	therapeutic	all	adult,olderadult	phase3	0.657407
https://pubmed.ncbi.nlm.nih.gov/29483125	2018	acute	n/a	goldensyrian	f	42	100	hamster		clindamycin+challenge	survival	f	t	12	630	100		spores	10	50	5	mg/kg	bid	5	vancomycin	1	acute	500	5000	125	mg	qid	10	antibiotic	vancomycin	no	therapeutic	all	adult,olderadult	phase3	0.1875
https://pubmed.ncbi.nlm.nih.gov/29483125	2018	acute	n/a	goldensyrian	f	42	100	hamster		clindamycin+challenge	survival	f	t	12	630	100		spores	10	50	5	mg/kg	bid	5	vancomycin	1	sustained	500	5000	125	mg	qid	10	antibiotic	vancomycin	no	therapeutic	all	adult,olderadult	phase3	0.3125
https://pubmed.ncbi.nlm.nih.gov/29483125	2018	acute	n/a	goldensyrian	f	42	100	hamster		clindamycin+challenge	survival	f	t	12	630	100		spores	10	50	5	mg/kg	bid	5	vancomycin	1	acute	500	5000	125	mg	qid	10	antibiotic	vancomycin	yes	therapeutic	all	adult,olderadult	phase2	0.863636
[truncated: 5,620 more rows]
